# Supplementary material for: Ubiquitination-dependent control of sexual differentiation in fission yeast
Source: eLife journal article supplement (doi:10.7554/elife.28046), 2017-08-25
Supplement: supp [file elife-28046-supp-v1.zip]

**A**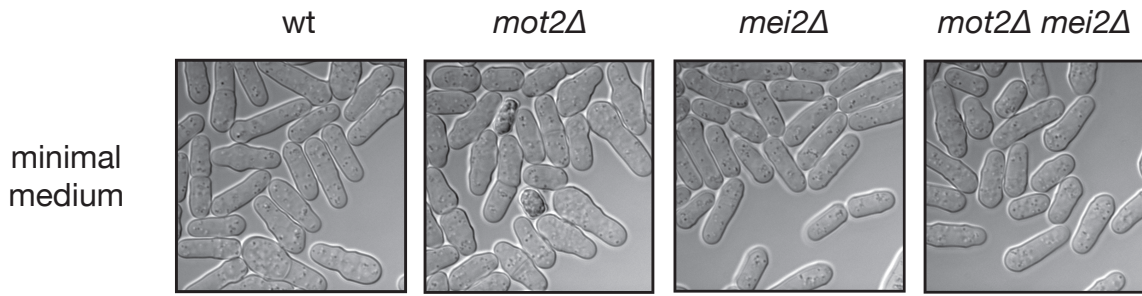**B**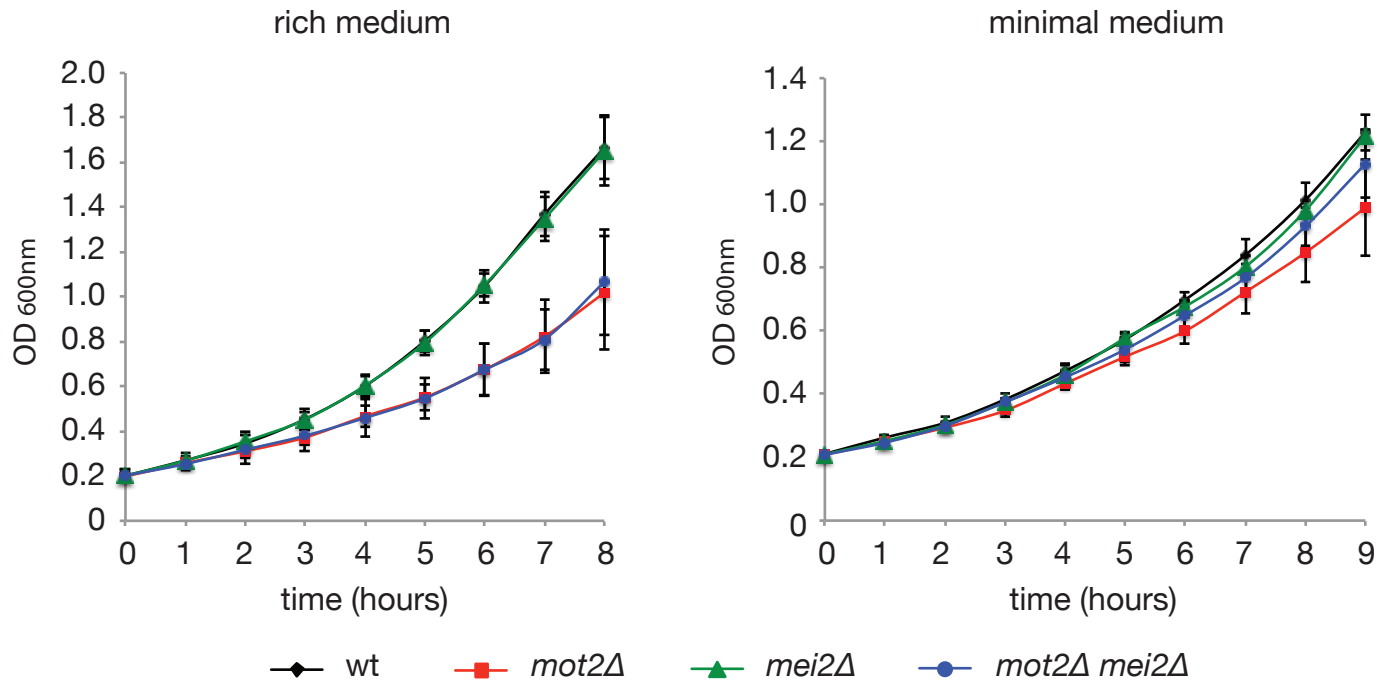

**Figure 4-figure supplement 1. Phenotypic characterization of the *mot2Δ* mutant.**

(A) Phase contrast images of exponentially growing wild type, *mot2Δ*, *mei2Δ* and *mot2Δ mei2Δ* cells cultured in minimal medium (EMM0.5X).

(B) Cells of the indicated genotypes were grown in rich (YE; left panel) and minimal (EMM0.5X; right panel) media, and the optical density (OD<sub>600nm</sub>) was measured over time.
