# Supplementary material for: Ubiquitination-dependent control of sexual differentiation in fission yeast
Source: eLife journal article supplement (doi:10.7554/elife.28046), 2017-08-25
Supplement: supp [file elife-28046-supp-v1.zip]

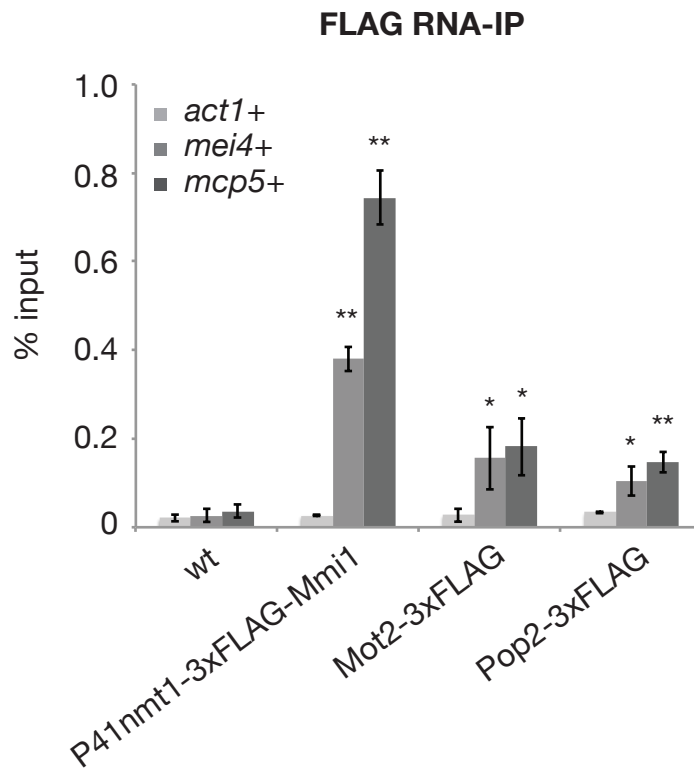

**Figure 2-figure supplement 1. The E3 ubiquitin ligase Mot2 binds to meiotic mRNAs.**

RNA-immunoprecipitation experiments in wild type cells. Shown are the enrichments (% input) of *act1+*, *mei4+* and *mcp5+* transcripts upon pulldown of 3xFLAG-tagged Mmi1, Mot2 and Pop2. Error bars represent the standard deviation of three or four independent immunoprecipitations from biological duplicates. Stars denote statistical significance (t-test p-values for 3xFLAG-tagged Mmi1, Mot2 and Pop2 strains: *mei4+* = 2.3E-4, 3.2E-2 and 3.7E-2; *mcp5+* = 1.5E-3, 1.7E-2 and 3.5E-3).
