# Supplementary material for: Ubiquitination-dependent control of sexual differentiation in fission yeast
Source: eLife journal article supplement (doi:10.7554/elife.28046), 2017-08-25
Supplement: supp [file elife-28046-supp-v1.zip]

**A**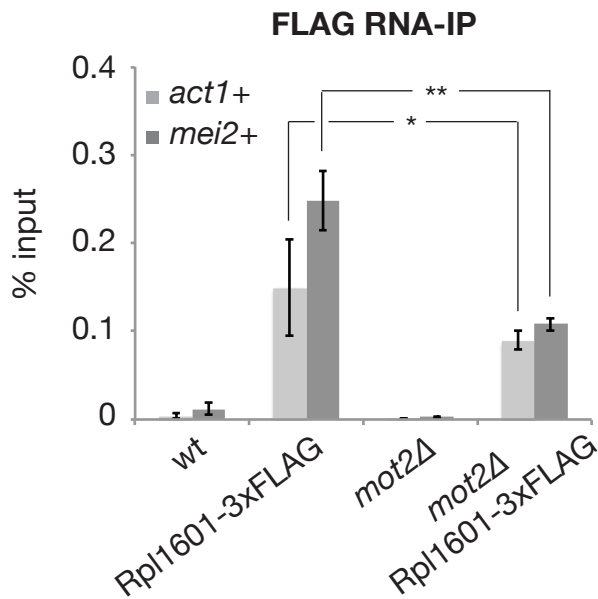**B**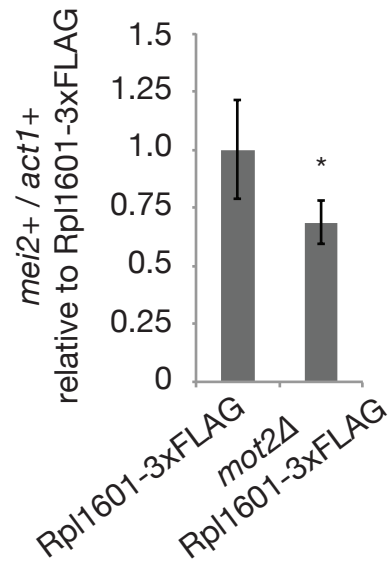**C**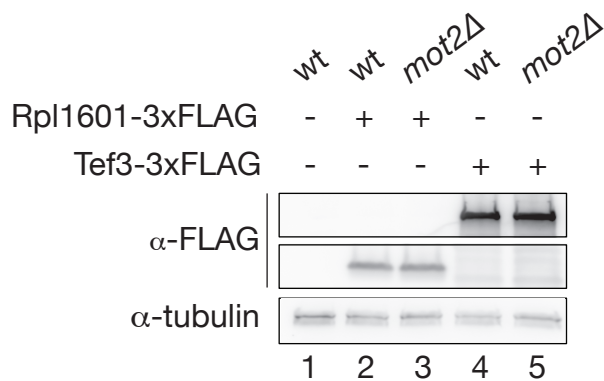

**Figure 5-figure supplement 1. Mot2 does not repress *mei2+* mRNA translation.**

**(A)** RNA-immunoprecipitation experiments in wild type and *mot2*Δ cells. Shown are the enrichments (% input) of *act1+* and *mei2+* mRNAs upon pulldown of the 3xFLAG-tagged 60S ribosomal subunit Rpl1601. Error bars represent the standard deviation of six independent immunoprecipitations from at least three biological replicates. Stars denote statistical significance between samples (t-test p-values: *act1+* = 4.29E-2; *mei2+* = 1.08E-4).

**(B)** Quantification of *mei2+* mRNA levels normalized to *act1+* transcripts and expressed relative to the wild type tagged strain (Rpl1601-3xFLAG). Error bars represent the standard deviation of six independent immunoprecipitations from at least three biological replicates. The star denotes statistical significance between samples (t-test p-value = 1.39E-2).

**(C)** Western blot showing that total levels of Rpl1601 and Tef3 are not affected by the deletion of *mot2+*. 3xFLAG-tagged proteins were detected with an anti-FLAG antibody and an anti-tubulin antibody was used as a loading control.
