# Supplementary material for: Ubiquitination-dependent control of sexual differentiation in fission yeast
Source: eLife journal article supplement (doi:10.7554/elife.28046), 2017-08-25
Supplement: supp [file elife-28046-supp-v1.zip]

Archive with 12 entries (12 files):
- elife_poa_e28046_Figure_2_figure_supplement_1.pdf
- elife_poa_e28046_Figure_1_figure_supplement_1.pdf
- elife_poa_e28046_Figure_5_figure_supplement_1.pdf
- elife_poa_e28046_Figure_6_figure_supplement_1.pdf
- elife_poa_e28046_Figure_1_source_data_1.xlsx
- elife_poa_e28046_Figure_2_source_data_1.xlsx
- elife_poa_e28046_Figure_3_figure_supplement_1.pdf
- elife_poa_e28046_Figure_4_figure_supplement_1.pdf
- elife_poa_e28046_Supplementary_file_1.docx
- elife_poa_e28046_Supplementary_file_2.docx
- elife_poa_e28046_Transparent_Reporting_File.pdf
- elife_poa_e28046_Figure_6_figure_supplement_2.pdf
