# Supplementary material for: Ubiquitination-dependent control of sexual differentiation in fission yeast
Source: eLife journal article supplement (doi:10.7554/elife.28046), 2017-08-25
Supplement: supp [file elife-28046-supp-v1.zip › elife_poa_e28046_Figure_1_source_data_1.xlsx]

## Sheet: Sheet1
							wt (untagged) +RNaseA/T1				Mmi1-TAP -RNaseA/T1				Mmi1-TAP +RNaseA/T1				mot2∆ Mmi1-TAP -RNaseA/T1				mot2∆ Mmi1-TAP +RNaseA/T1
Accession	Description	ΣCoverage	Σ# Proteins	Σ# Unique Peptides	Σ# Peptides	Σ# PSMs	Score A2	Coverage A2	# Peptides A2	# PSM A2	Score B2	Coverage B2	# Peptides B2	# PSM B2	Score C2	Coverage C2	# Peptides C2	# PSM C2	Score D2	Coverage D2	# Peptides D2	# PSM D2	Score E2	Coverage E2	# Peptides E2	# PSM E2	# AAs	MW [kDa]	calc. pI
P87112	General negative regulator of transcription subunit 1 OS=Schizosaccharomyces pombe (strain 972 / ATCC 24843) GN=not1 PE=1 SV=1 - [NOT1_SCHPO]	66.52	1	104	104	679	21.81	1.1	1	1	3103.49	55.33	83	147	3975.59	63.52	97	194	2765.36	56.86	89	143	3976.77	59.62	90	194	2100	236.985	5.2876
	Sequence	# PSMs	# Proteins	# Protein Groups	Protein Group Accessions	Modifications	MH+ [Da]	q-Value	PEP	A2	IonScore A2	Exp Value A2	B2	IonScore B2	Exp Value B2	C2	IonScore C2	Exp Value C2	D2	IonScore D2	Exp Value D2	E2	IonScore E2	Exp Value E2	# Missed Cleavages
	NPLPQLSIISHIILSPTSMFDIR	14	1	1	P87112		2592.42	0	5.236e-06	High	21.81	0.276853	High	36.08	0.00979018	High	32.66	0.0242274	High	27.78	0.0677736	High	37.01	0.00826129	0
	NITQLIIQQSVLEIISAVVR	9	1	1	P87112		2237.32	0	1.671e-07				High	101.72	6.49422e-10	High	97.79	1.56361e-09	High	94.04	3.7079e-09	High	100.89	7.82116e-10	0
	LFSSILSELDDAK	4	1	1	P87112		1437.75	0	7.424e-06				High	90.39	4.96821e-08	High	90.81	4.10776e-08	High	89.9	5.26996e-08	High	81.96	3.21263e-07	0
	SVSPASEILSDLDNK	8	1	1	P87112		1574.79	0	2.076e-06				High	85.53	1.74377e-07	High	75.06	1.96178e-06	High	54.68	0.0002165	High	51.96	0.000386535	0
	NTFQSLLNQLSDPTQQQSIDKNDLDLLR	7	1	1	P87112		3244.65	0	2.257e-08				High	83.23	7.56971e-07	High	60.82	0.000127048	High	48.29	0.00247506	High	65.32	4.9235e-05	1
	INDLFSEILMSFLK	8	1	1	P87112		1669.89	0	3.738e-06				High	77.69	9.78741e-07	High	94.54	1.91952e-08	High	58.99	7.38169e-05	High	57.64	9.41001e-05	0
	DTLQAILDIMNNNAETLSPSEK	7	1	1	P87112		2417.19	0	2.162e-06				High	76.56	3.26122e-06	High	59.81	0.000153469	High	54.68	0.000524909	High	41.39	0.010721	0
	FALEIAALAAAR	13	1	1	P87112		1216.71	0	2.377e-06				High	75.75	6.39904e-07	High	75.58	6.58532e-07	High	74.93	7.71279e-07	High	75.29	6.46326e-07	0
	LSLSTIMSNNSFTSLNGLR	8	1	1	P87112		2055.05	0	3.185e-08				High	75.59	2.38238e-06	High	78.04	1.32774e-06	High	47.5	0.00146886	High	62.1	5.27497e-05	0
	SEQGSGPVTDFAIELLR	5	1	1	P87112		1818.92	0	1.932e-09				High	74.87	2.67023e-06	High	84.49	3.02464e-07	High	52.09	0.000512954	High	60.09	8.43341e-05	0
	YFLLTAIANQLR	8	1	1	P87112		1422.81	0	2.765e-05				High	71.26	1.26067e-06	High	55.77	4.423e-05	High	59.91	1.63861e-05	High	53.87	6.85041e-05	0
	EFNVNPVVSVDSLK	4	1	1	P87112		1546.81	0	2.047e-06				High	68.6	6.97094e-06	High	68.91	6.81845e-06	High	68.36	7.44725e-06	High	69.03	6.45134e-06	0
	VLLVNNDKINDLFSEILMSFLK	6	1	1	P87112		2565.4	0	2.69e-19				High	68.6	6.19793e-06	High	57.46	8.15706e-05	High	82.96	2.31668e-07	High	58.05	6.85454e-05	1
	LSSELTPQQFQLYENFDR	8	1	1	P87112		2215.07	0	8.428e-07				High	68.41	1.88917e-05	High	50.77	0.00108753	High	47.2	0.00256475	High	47.06	0.00264877	0
	TNLLIGLTTSVKPTLAK	9	1	1	P87112		1770.07	0	7.419e-06				High	67.69	8.00014e-07	High	71.57	3.27414e-07	High	40.62	0.000498503	High	43.27	0.000273167	0
	FGILTSGEVDYHVAR	10	1	1	P87112		1663.84	0	1.168e-07				High	66.66	1.30867e-05	High	79.59	6.73141e-07	High	41.7	0.00419171	High	105.2	1.84972e-09	0
	AIVSSFENLNWEAMLSMFDNPK	6	1	1	P87112		2543.2	0	9.204e-07				High	64.68	6.28394e-05	High	71.2	1.39199e-05	High	60.48	0.00015642	High	37.1	0.0353214	0
	SSSNNPQELLIK	4	1	1	P87112		1329.7	0	2.877e-05				High	63.08	1.86483e-05	High	53.39	0.000173636	High	39.32	0.00442656	High	40.05	0.00374167	0
	LLVELYQFADFR	8	1	1	P87112		1513.81	0	2.275e-06				High	60.89	4.25683e-05	High	59.8	5.46601e-05	High	64.65	1.7584e-05	High	80.71	4.3563e-07	0
	APLISNSVSASLEK	4	1	1	P87112		1415.77	0	3.181e-07				High	60.12	3.34139e-05	High	90.76	2.88355e-08	High	75.3	1.25279e-06	High	75.8	1.2428e-06	0
	YVYQALLMPTDSK	6	1	1	P87112		1528.77	0	2.673e-05				High	58.52	8.35895e-05	High	54.35	0.000218349	High	56.93	0.000120951	High	27.99	0.0944391	0
	NKPITTLQVSFK	6	1	1	P87112		1375.79	0	0.0002337				High	57.84	2.26923e-05	High	42.1	0.000850901	High	46.84	0.00028568	High	33.45	0.00623561	0
	NESEQKEESVVLSIDTVNVLLTTLMDNVSISEEVSEHIK	6	1	1	P87112		4358.18	0	4.56e-07				High	57.45	0.000393953	High	46.26	0.0055812	High	34.02	0.0842289	High	66.14	5.06993e-05	1
	EGLFTTDYDR	4	1	1	P87112		1216.55	0	0.0003568				High	55.47	7.33602e-05	High	38.95	0.00345119	High	25.41	0.0847394	High	55.56	7.26895e-05	0
	LNLPIILSLIR	5	1	1	P87112		1264.84	0	8.359e-09				High	54.7	3.38041e-06	High	34.6	0.000345915	High	73.77	4.18765e-08	High	69.62	1.08885e-07	0
	ALSFQDWLDKK	6	1	1	P87112		1350.71	0	0.0008903				High	53.72	0.000212734	High	51.9	0.000340905	High	41.42	0.00361275	High	21.73	0.336386	1
	LLSEVVTYETSLFLNFLDEK	8	1	1	P87112		2360.22	0	1.951e-06				High	53.51	0.000466825	High	73.86	4.32118e-06	High	37.97	0.0155439	High	68.38	1.41436e-05	0
	TNPQFLFAFLR	10	1	1	P87112		1353.73	0	0.0005368				High	53.45	0.000122905	High	45.79	0.0007329	High	36.75	0.00617139	High	53.41	0.000128146	0
	YTEGSTEGTVSSK	4	1	1	P87112		1345.61	0	3.546e-05				High	53.45	0.00019588	High	12.95	2.6617	High	23.8	0.179879	High	28.58	0.0728047	0
	DLLLEGIDSGR	4	1	1	P87112		1187.63	0	0.0002178				High	52.92	0.000155449	High	52.91	0.000155807	High	52.92	0.000155449	High	42.32	0.00178479	0
	APLISNSVSASLEK	7	1	1	P87112	N6(Deamidated)	1416.76	0	5.561e-05				High	52.77	0.000215077	High	25.13	0.139487	High	46.54	0.00100706	High	33.27	0.0214295	0
	NMVLSAFPSDLHLPDPFAQGLK	4	1	1	P87112		2397.23	0	9.829e-07				High	52.52	0.000652957	High	44.93	0.00342416	High	24.34	0.417642	High	46.38	0.00265356	0
	NLGSWLGSITLLR	13	1	1	P87112		1429.82	0	3.058e-05				High	52.41	0.000150706	High	50.37	0.000241062	High	48.78	0.00034764	High	65.35	8.57724e-06	0
	EPLQMLMINNFR	8	1	1	P87112		1505.76	0	6.854e-08				High	51.12	0.000436178	High	45.45	0.0016094	High	60.5	5.04894e-05	High	56.89	0.000115522	0
	SSSTSESGHPISLDSK	8	1	1	P87112		1618.76	0	6.202e-09				High	50.36	0.000653979	High	67.51	1.23838e-05	High	67.06	1.39031e-05	High	85.84	1.83213e-07	0
	TTPNLPFVDPAGAANLHLNLPSVLK	6	1	1	P87112		2599.43	0	2.397e-07				High	50.33	0.000420781	High	36.83	0.00915037	High	10.19	3.88142	High	43.09	0.00231218	0
	FLDLKDDIDK	6	1	1	P87112		1221.64	0	0.001841				High	50.3	0.000287442	High	45.74	0.000821392	High	50.74	0.000256374	High	50.53	0.000273943	1
	LDSFSALANPASPK	4	1	1	P87112		1417.73	0	3.767e-06				High	50.14	0.000454606	High	51.73	0.000315236	High	77.96	7.30198e-07	High	90.09	4.58891e-08	0
	EQMTTVLLER	3	1	1	P87112		1219.64	0	0.0007763				High	49.38	0.000425048				High	45.99	0.000927764	High	49.5	0.000412903	0
	EMIASNENTEVEK	1	1	1	P87112		1493.68	0	3.661e-05				High	49.32	0.000526275										0
	ALSFQDWLDK	4	1	1	P87112		1222.61	0	0.001113				High	47.65	0.00056691	High	25.71	0.116141	High	43.24	0.00156263	High	34.78	0.0112605	0
	IVLTLQNFK	4	1	1	P87112		1075.65	0	0.0006923				High	47.43	0.000106623	High	64.37	2.15701e-06	High	47.01	0.000126408	High	64.17	2.25867e-06	0
	INDLFSEILMSFLK	3	1	1	P87112	M10(Oxidation)	1685.88	0	4.503e-06				High	47.27	0.00113437	High	49.91	0.000663611				High	43.26	0.00287722	0
	LSLSTIMSNNSFTSLNGLR	11	1	1	P87112	N16(Deamidated)	2056.03	0	7.216e-08				High	45.11	0.00314793	High	80.99	8.40346e-07	High	80.1	1.00362e-06	High	64.94	3.24154e-05	0
	DFAAESNPSR	4	1	1	P87112		1093.49	0	7.809e-08				High	44.86	0.000563364	High	47.45	0.000310305	High	57.82	2.68444e-05	High	46.49	0.000364631	0
	AQILFLLSTLR	4	1	1	P87112		1274.78	0	6.866e-05				High	44.2	0.000133066	High	63.12	1.60884e-06	High	59.02	4.38599e-06	High	33.73	0.00148275	0
	DSSSVNQVVEFIIENDFTSHIGNIQPNR	2	1	1	P87112	N15(Deamidated)	3160.52	0	9.425e-05				High	43.46	0.0103801							High	43.71	0.0102314	0
	DSSSVNQVVEFIIENDFTSHIGNIQPNR	9	1	1	P87112		3159.53	0	1.231e-18				High	42.87	0.0120377	High	67.25	4.40115e-05	High	92.38	1.35072e-07	High	66.94	4.50021e-05	0
	LFSLGHDR	4	1	1	P87112		944.495	0	0.007148				High	42.38	0.000997216	High	46.08	0.000425392	High	42.13	0.0010563	High	46.48	0.000387962	0
	ILLTDSK	4	1	1	P87112		789.472	0	0.006668				High	41.34	0.000378275	High	45.7	0.000138614	High	27.21	0.00979055	High	40.74	0.000434317	0
	LFSLGHDRDSIVIATNTTNSFSPDVESEVESYFQALYER	1	1	1	P87112	Q34(Deamidated)	4438.11	0	0.0001273				High	39.59	0.0378717										1
	TDSADSTDALNSNLNNTVENEANQTALNYAR	3	1	1	P87112		3326.5	0	6.785e-07				High	39.53	0.0335793				High	46.42	0.00684559	High	63.43	0.000136773	0
	QTNFTLDFLWVLWR	5	1	1	P87112		1838.96	0	4.056e-06				High	38.4	0.00995908	High	27.96	0.110689	High	38.28	0.0103347	High	73.41	3.18086e-06	0
	EESVVLSIDTVNVLLTTLMDNVSISEEVSEHIK	5	1	1	P87112		3642.86	0	5.03e-08				High	38.21	0.0222133	High	58.9	0.000192078	High	41.48	0.0102593	High	54.54	0.000503259	0
	MDNIEPSEMYR	4	1	1	P87112		1384.59	0	0.004457				High	37.96	0.00551048	High	33.15	0.0160261	High	32.02	0.0207573	High	21.83	0.217184	0
	EGLFTTDYDRIPLIK	6	1	1	P87112		1780.95	0	9.495e-05				High	37.77	0.00992628	High	34.61	0.0193553	High	36.9	0.0121279	High	37.05	0.0112823	1
	TAVGGENPMALPGNFVNSITSLYEISESFSGETK	5	1	1	P87112		3546.7	0	2.288e-06				High	37.74	0.0492687	High	31.17	0.221551	High	63.12	0.000138361	High	74.89	9.2453e-06	0
	SVGIAAITTK	4	1	1	P87112		960.572	0	1.139e-05				High	37.25	0.0020626	High	33.54	0.00484634	High	47.12	0.000212527	High	28.12	0.0168816	0
	FGMQALVQFQEK	4	1	1	P87112		1425.72	0	7.895e-06				High	36.97	0.0112409	High	44.44	0.00176637	High	38.02	0.00860587	High	68.22	7.38991e-06	0
	TDSADSTDALNSNLNNTVENEANQTALNYAR	8	1	1	P87112	N16(Deamidated)	3327.5	0	0.003853				High	36.85	0.0608151	High	22.06	1.83423	High	27.91	0.47879	High	15.71	7.86806	0
	DKLDSFSALANPASPK	4	1	1	P87112	S14(Phospho)	1740.82	0	1.444e-05				High	36.66	0.0169167				High	24.18	0.30059	High	24.95	0.251753	1
	KTTPNLPFVDPAGAANLHLNLPSVLK	4	1	1	P87112		2727.52	0	1.562e-09				High	35.32	0.00753507	High	18.43	0.381122	High	35.72	0.00764903	High	26.48	0.0655599	1
	TAVGGENPMALPGNFVNSITSLYEISESFSGETK	3	1	1	P87112	M9(Oxidation)	3562.67	0	0.0001676				High	34.46	0.115862	High	19.97	3.08927				High	26.61	0.650672	0
	LANSRPLTALFGPMK	4	1	1	P87112		1615.9	0	2.905e-05				High	34.37	0.015684	High	24.89	0.132331	High	19.96	0.432969	High	32.3	0.0240248	0
	VLLVNNDKINDLFSEILMSFLK	6	1	1	P87112	N10(Deamidated)	2566.4	0	9.173e-05				High	33.53	0.0263282	High	62.38	2.824e-05	High	32.04	0.0349784	High	36.36	0.0121152	1
	NTFQSLLNQLSDPTQQQSIDKNDLDLLR	6	1	1	P87112	N22(Deamidated)	3245.63	0	0.0035				High	33.47	0.0811853	High	59.64	0.000190179	High	18.06	2.95513				1
	NTFQSLLNQLSDPTQQQSIDK	4	1	1	P87112		2405.19	0	4.737e-05				High	33.08	0.0738305	High	35.68	0.0420871	High	21.87	0.958616				0
	LLLEVYSSQDTPTK	4	1	1	P87112		1593.84	0	5.745e-06				High	32.4	0.030412	High	58.47	8.43441e-05	High	40.88	0.00493624	High	43.83	0.00245502	0
	KYPPGTATETDVAYLINSLVAIHDYGAWDTVLMGK	3	1	1	P87112		3809.91	0	0.0002128				High	32.15	0.117214	High	47.74	0.00344696	High	31.22	0.153888				1
	FEIELLLNNLNVK	6	1	1	P87112		1558.88	0	2.944e-05				High	31.81	0.0201378	High	44.21	0.00126312	High	24.42	0.110411	High	47.16	0.000587505	0
	DNLTPAYLPWFSHYIVTQR	7	1	1	P87112		2321.17	0	4.688e-08				High	30.44	0.11517	High	11.6	8.7655	High	28.53	0.181454	High	38.07	0.019549	0
	LIQGNSYR	4	1	1	P87112		950.505	0	0.0089				High	29.24	0.0191194	High	29.31	0.0191654	High	20.68	0.139803	High	41.45	0.00117089	0
	NMVLSAFPSDLHLPDPFAQGLK	3	1	1	P87112	M2(Oxidation)	2413.22	0	2.142e-06				High	29.05	0.155067	High	54.97	0.000387039				High	39.86	0.0126668	0
	ASSSVIFKPPNPWLMGILK	2	1	1	P87112	M15(Oxidation)	2101.15	0	6.05e-05				High	28.25	0.0716697	High	15.97	1.2305							0
	AQILFLLSTLREDQYDTK	6	1	1	P87112		2154.14	0	7.362e-07				High	27.91	0.119819	High	24.77	0.246902	High	34.01	0.029412	High	17.75	1.10549	1
	FSDAISGSDSEVFEDFDIEAFLDHFQFSPLER	3	1	1	P87112		3696.67	0	4.535e-05				High	27.76	0.562613	High	26.31	0.779301	High	25.14	1.01979				0
	ASSSVIFKPPNPWLMGILK	4	1	1	P87112		2085.16	0	1.728e-09				High	27.5	0.0687305	High	27.82	0.0659133	High	50.72	0.000323217	High	32.87	0.0204759	0
	DTLQAILDIMNNNAETLSPSEK	14	1	1	P87112	N11(Deamidated)	2418.17	0	9.609e-07				High	27.17	0.310441	High	45.46	0.00450705	High	32.6	0.0871297	High	16.9	3.24024	0
	DSIVIATNTTNSFSPDVESEVESYFQALYER	5	1	1	P87112		3511.63	0	4.146e-05				High	27.03	0.619326	High	55.49	0.000901419	High	52.29	0.00185353	High	49.07	0.00385204	0
	EANFLSLYGK	3	1	1	P87112	N3(Deamidated)	1142.57	0	0.0007959				High	26.72	0.0511817				High	19.34	0.271241	High	16.98	0.46604	0
	NEDYNFWK	4	1	1	P87112		1115.48	0	0.003182				High	26.03	0.0406619	High	16.01	0.408496	High	26.36	0.0376867	High	12.09	1.00737	0
	LDSFSALANPASPK	3	1	1	P87112	S12(Phospho)	1497.7	0	2.637e-05				High	25.6	0.148591				High	25.09	0.169119	High	37.18	0.0103274	0
	DYSEELVNYAK	4	1	1	P87112		1330.62	0	7.88e-05				High	24.87	0.139947	High	40.62	0.0037236	High	28.24	0.0604373	High	51.71	0.000271498	0
	YPPGTATETDVAYLINSLVAIHDYGAWDTVLMGK	5	1	1	P87112		3681.82	0	7.25e-06				High	24.43	0.839067	High	20.64	2.00211	High	18.1	3.59868				0
	NPLPQLSIISHIILSPTSMFDIR	4	1	1	P87112	M19(Oxidation)	2608.43	0	0.002074				High	24.23	0.213895	High	16	1.26473	High	34.47	0.0174706	High	15.5	1.44865	0
	DSIVIATNTTNSFSPDVESEVESYFQALYER	7	1	1	P87112	Q26(Deamidated)	3512.64	0	9.345e-07				High	23.76	1.30573	High	30.43	0.283766	High	20.42	2.84647	High	87.31	5.84837e-07	0
	TAINVSLYWNFSNDLEK	6	1	1	P87112		2013.99	0	7.038e-05				High	23.72	0.484916	High	17.35	2.09664	High	16.53	2.40784	High	24.3	0.404045	0
	AIVSSFENLNWEAMLSMFDNPK	4	1	1	P87112	M17(Oxidation)	2559.19	0	0.0001752				High	23.15	0.92259	High	39.38	0.0217426	High	18.54	2.62633	High	26.08	0.472493	0
	NLGSWLGSITLLR	5	1	1	P87112	N1(Deamidated)	1430.8	0	1.857e-05				High	22.36	0.224756	High	40.76	0.00267788	High	12.08	1.97602	High	50.29	0.000291379	0
	QAYEQLVETMNK	4	1	1	P87112	M10(Oxidation)	1469.69	0	0.001311				High	22.32	0.283105	High	25.98	0.149264	High	10.91	4.513	High	33.88	0.0197673	0
	YPPGTATETDVAYLINSLVAIHDYGAWDTVLMGK	1	1	1	P87112	N16(Deamidated)	3682.82	0	0.0005131				High	22.09	1.5058										0
	MDNIEPSEMYR	3	1	1	P87112	M1(Oxidation)	1400.58	0	0.001933				High	20.63	0.254733	High	35.62	0.00848517	High	20.54	0.251236				0
	YINYCNLILGIPSLQLVRPDIYDSIR	4	1	1	P87112	Y1(Phospho); Q15(Deamidated)	3132.59	0	0.0001456				High	20.05	1.62271							High	39.41	0.018437	0
	SSDGLATYK	4	1	1	P87112		941.458	0	7.573e-10				High	18.43	0.167235	High	67.14	2.25074e-06	High	87.44	2.10052e-08	High	77.83	2.17557e-07	0
	NITQLIIQQSVLEIISAVVR	2	1	1	P87112	Q8(Deamidated)	2238.31	0	7.098e-06				High	13.98	0.57592	High	46.71	0.000252766							0
	LANSRPLTALFGPMK	7	1	1	P87112	N3(Deamidated)	1616.88	0	8.938e-05				High	13.67	2.07037	High	14.57	1.64794	High	16.91	1.01445	High	24.29	0.179493	0
	TDSADSTDALNSNLNNTVENEANQTALNYAR	4	1	1	P87112	N13(Deamidated); N15(Deamidated)	3328.48	0	6.874e-06				High	12.5	16.052	High	56.73	0.000600878							0
	AAFVYQLHK	4	1	1	P87112		1076.59	0	0.001074				High	11.46	1.88984				High	12.18	1.60113	High	42.54	0.00147097	0
	MLEFEDADGLNVFLVEVLDFLMSR	4	1	1	P87112		2802.37	0	1.337e-09							High	93.2	8.85226e-08				High	104.63	6.53921e-09	0
	LFSLGHDRDSIVIATNTTNSFSPDVESEVESYFQALYER	2	1	1	P87112		4437.11	0	5.502e-06							High	64.08	0.000139472				High	27.87	0.580713	1
	LNLKFEIELLLNNLNVK	3	1	1	P87112		2027.19	0	6.003e-05							High	63.36	4.98223e-06	High	31.69	0.00745406	High	24.62	0.0376207	1
	RFSDAISGSDSEVFEDFDIEAFLDHFQFSPLER	2	1	1	P87112		3852.76	0	2.585e-08							High	58.78	0.000475108	High	21.21	2.66254				1
	MLEFEDADGLNVFLVEVLDFLMSR	3	1	1	P87112	M22(Oxidation)	2818.37	0	1.228e-06							High	56.86	0.000400174				High	22.37	1.18319	0
	KYPPGTATETDVAYLINSLVAIHDYGAWDTVLMGK	2	1	1	P87112	N17(Deamidated)	3810.9	0	1.412e-05							High	55.33	0.000621496	High	12.42	11.37				1
	TTPNLPFVDPAGAANLHLNLPSVLK	2	1	1	P87112	N15(Deamidated)	2600.42	0	4.011e-07							High	53.07	0.000219216				High	17.73	0.750516	0
	FFPDYPLEALALTAVLFGSLIQFELLSFVPLGVALR	3	1	1	P87112		3967.21	0	8.95e-06							High	45.14	0.00102116				High	24.07	0.126924	0
	KALSFQDWLDKK	3	1	1	P87112		1478.8	0	1.916e-06							High	43.31	0.0019203	High	47.76	0.00066914	High	26.52	0.0917001	2
	EANFLSLYGK	2	1	1	P87112		1141.59	0	0.0005704							High	40.93	0.00172748				High	40.95	0.00171955	0
	EMIASNENTEVEKDKLDSFSALANPASPK	1	1	1	P87112		3135.52	0	0.0007573							High	39.43	0.0272292							2
	DKLDSFSALANPASPK	2	1	1	P87112		1660.86	0	0.0001567							High	38.92	0.00868779				High	34.85	0.0208352	1
	EFNVNPVVSVDSLKDYSEELVNYAK	3	1	1	P87112		2858.41	0	4.033e-05							High	37.66	0.0313311	High	14.72	6.15043	High	33.21	0.089489	1
	YFLLTAIANQLR	1	1	1	P87112	N9(Deamidated)	1423.8	0	0.002597							High	32.65	0.0117885							0
	KYPPGTATETDVAYLINSLVAIHDYGAWDTVLMGK	1	1	1	P87112	M33(Oxidation)	3825.91	0	0.002432							High	31.62	0.14441							1
	VLLVNNDKINDLFSEILMSFLK	2	1	1	P87112	M18(Oxidation)	2581.39	0	9.806e-05							High	31.54	0.0357041				High	34.12	0.0247264	1
	TAVGGENPMALPGNFVNSITSLYEISESFSGETK	8	1	1	P87112	N14(Deamidated)	3547.7	0	3.11e-07							High	31.15	0.23723	High	49.58	0.00321374	High	28.6	0.418671	0
	SVSPASEILSDLDNKQQLNDQIIIVFVSWVHLLR	4	1	1	P87112	Q16(Deamidated)	3878.08	0	0.003342							High	30.49	0.0510077							1
	DNLTPAYLPWFSHYIVTQR	1	1	1	P87112	N2(Deamidated)	2322.17	0	0.0004423							High	24.37	0.490628							0
	IIALIIGVFAELHNSMAEFVHQK	6	1	1	P87112		2580.4	0	4.199e-05							High	23.18	0.248594				High	23.9	0.212449	0
	LFDSLHEHVMAPSSANNVSTEEATELMGQV	3	1	1	P87112		3243.5	0	0.002179							High	17.97	4.50756	High	13.68	12.0336	High	16.49	6.37599	0
	FGMQALVQFQEK	3	1	1	P87112	M3(Oxidation)	1441.71	0	0.002224							High	17.95	0.769558	High	28.3	0.0808333	High	32.9	0.0267714	0
	FMITGTPSLVLFFTIFTNAYK	4	1	1	P87112		2411.27	0	2.271e-06							High	17.65	1.44218	High	13.21	4.10198	High	57.37	0.000153365	0
	KALSFQDWLDK	2	1	1	P87112		1350.71	0	0.005381							High	17.64	0.910868				High	36.12	0.0128402	1
	RFSDAISGSDSEVFEDFDIEAFLDHFQFSPLER	1	1	1	P87112	Q27(Deamidated)	3853.77	0	2.428e-05										High	36.48	0.0795716				1
	NMVLSAFPSDLHLPDPFAQGLK	2	1	1	P87112	N1(Deamidated)	2398.21	0	3.725e-05										High	31.66	0.0888746	High	37	0.0260082	0
	EMIASNENTEVEK	2	1	1	P87112	M2(Oxidation)	1509.67	0	3.296e-09										High	31.31	0.035649	High	14.63	1.83883	0
	MLEFEDADGLNVFLVEVLDFLMSR	1	1	1	P87112	N11(Deamidated)	2803.37	0	0.002041										High	10.05	19.173				0
	MLEFEDADGLNVFLVEVLDFLMSR	1	1	1	P87112	M1(Oxidation); N11(Deamidated)	2819.37	0	4.811e-07													High	67.3	3.80704e-05	0
	LSLSTIMSNNSFTSLNGLR	1	1	1	P87112	S11(Phospho)	2135.02	0	0.001027													High	56.63	0.000273434	0
	SNLNCIELVQILLR	1	1	1	P87112	S1(Phospho)	1707.87	0	0.002031													High	38.26	0.0109273	0
	TAINVSLYWNFSNDLEK	1	1	1	P87112	N10(Deamidated)	2014.98	0	4.619e-05													High	31.56	0.0783068	0
	QQLNDQIIIVFVSWVHLLR	1	1	1	P87112		2321.32	0	0.0001712													High	20.28	0.193607	0
	IICNRPHPWGLLITFTELLK	2	1	1	P87112	T14(Phospho)	2444.28	0	0.003051													High	11.19	7.07864	0
	FDAIIEK	4	1	1	P87112		835.456	0.001	0.01527				High	34.78	0.00392538	High	33.97	0.00473023	High	30.83	0.00974725	High	22.9	0.0605176	0
	LLYNGFLR	7	1	1	P87112	N4(Deamidated)	996.551	0.001	0.004982				High	32.04	0.00690816	High	28.42	0.0158268	High	27.54	0.0194698	High	27.64	0.0190266	0
	FLDLKDDIDKAQFK	5	1	1	P87112		1695.9	0.001	0.01547				High	29.54	0.0608673	High	27.43	0.0977681	High	13.78	2.2908				2
	FSDAISGSDSEVFEDFDIEAFLDHFQFSPLER	3	1	1	P87112	Q26(Deamidated)	3697.67	0.001	0.01508				High	20.45	3.01711	High	31.34	0.245805							0
	IVLTLQNFK	4	1	1	P87112	N7(Deamidated)	1076.63	0.001	0.009963				High	16.49	0.200827	High	24.7	0.0467605				High	30.46	0.0078706	0
	LIQGNSYR	4	1	1	P87112	N5(Deamidated)	951.489	0.001	0.01281				High	14.56	0.642149	High	25.94	0.0467343	High	23.12	0.0865363	High	24.36	0.0650427	0
	LSLSTIMSNNSFTSLNGLR	2	1	1	P87112	N10(Deamidated); N16(Deamidated)	2057.02	0.001	0.01168				High	13.39	5.19304							High	13.11	5.60973	0
	TAVGGENPMALPGNFVNSITSLYEISESFSGETK	1	1	1	P87112	N7(Deamidated); N14(Deamidated)	3548.68	0.001	0.01948				High	12.04	18.5457										0
	LFDSLHEHVMAPSSANNVSTEEATELMGQV	1	1	1	P87112	N16(Deamidated)	3244.49	0.001	0.02024				High	11.9	18.1364										0
	LLYNGFLR	2	1	1	P87112		995.567	0.001	0.03182							High	32.46	0.00524979				High	26.08	0.0228109	0
	EPLQMLMINNFR	2	1	1	P87112	M5(Oxidation)	1521.76	0.001	0.0245							High	25.98	0.147876				High	14.37	2.17894	0
	VLLVNNDK	2	1	1	P87112	N5(Deamidated)	915.515	0.001	0.007776							High	20.61	0.210723							0
	SVSPASEILSDLDNKQQLNDQIIIVFVSWVHLLR	1	1	1	P87112		3877.08	0.001	0.01659							High	17.13	0.984671							1
	SSSTSESGHPISLDSKTPPPNDSK	1	1	1	P87112	T17(Phospho)	2535.13	0.001	0.01305							High	12.92	8.75771							1
	YPPGTATETDVAYLINSLVAIHDYGAWDTVLMGK	1	1	1	P87112	M32(Oxidation)	3697.82	0.001	0.009571							High	11.55	17.9824							0
	INDLFSEILMSFLK	1	1	1	P87112	N2(Deamidated)	1670.88	0.001	0.01003										High	16.32	1.40708				0
	SSSTSESGHPISLDSK	3	1	1	P87112	S2(Phospho)	1698.72	0.001	0.02263													High	21.08	0.400833	0
	LSSELTPQQFQLYENFDR	1	1	1	P87112	Q11(Deamidated)	2216.06	0.001	0.03331													High	16.71	2.84122	0
	NDLDLLR	3	1	1	P87112		858.468	0.002	0.05122							High	32.57	0.0118694	High	32.88	0.0110517	High	35.34	0.00628693	0
	LPEVTR	3	1	1	P87112		714.415	0.003	0.04726				High	27.92	0.0155786	High	33.93	0.00390416	High	25.59	0.0266396				0
	YINYCNLILGIPSLQLVRPDIYDSIR	2	1	1	P87112	Y1(Phospho)	3131.59	0.003	0.04987				High	20.75	1.36054	High	22.05	0.986437							0
	NTFQSLLNQLSDPTQQQSIDKNDLDLLR	1	1	1	P87112	N1(Deamidated); N22(Deamidated)	3246.63	0.003	0.04271							High	16.32	4.21773							1
	SWVMAK	2	1	1	P87112		721.371	0.004	0.06534				High	28.23	0.015332	High	27.99	0.0162032							0
	LLLDELK	3	1	1	P87112		843.518	0.004	0.02914							High	24	0.0503606	High	27.29	0.0236097	High	26.76	0.0266741	0
	EMIASNENTEVEK	1	1	1	P87112	N8(Deamidated)	1494.66	0.006	0.08739							High	11.77	2.72429							0
	NPLPQLSIISHIILSPTSMFDIR	1	1	1	P87112	Q5(Deamidated)	2593.42	0.006	0.1019													High	12.31	2.5497	0
	ELPEDVLNAEFPDGTDVITQYIVAASSQITVTDAVAQVFGKPKPAIK	1	1	1	P87112	Q28(Deamidated)	4986.61	0.007	0.09631							High	18.26	1.54654							0
	NTFQSLLNQLSDPTQQQSIDK	1	1	1	P87112	Q16(Deamidated)	2406.19	0.007	0.08519										High	10.72	12.6703				0
	NESEQKEESVVLSIDTVNVLLTTLMDNVSISEEVSEHIK	1	1	1	P87112	N18(Deamidated)	4359.18	0.007	0.1252													High	11.16	16.4335	1
	FLEELK	1	1	1	P87112		778.435	0.008	0.09352										High	32.37	0.00457749				0
	TNLKNLGSWLGSITLLR	1	1	1	P87112		1886.09	0.008	0.1346													High	13.78	1.0072	1
O74958	YTH domain-containing protein mmi1 OS=Schizosaccharomyces pombe (strain 972 / ATCC 24843) GN=mmi1 PE=1 SV=3 - [MMI1_SCHPO]	87.5	1	38	38	478	22.43	5.53	1	1	2745.82	81.56	32	154	1938.34	82.99	30	111	1777.7	83.4	32	110	1733.67	84.84	29	102	488	54.5048	9.12939
	Sequence	# PSMs	# Proteins	# Protein Groups	Protein Group Accessions	Modifications	MH+ [Da]	q-Value	PEP	A2	IonScore A2	Exp Value A2	B2	IonScore B2	Exp Value B2	C2	IonScore C2	Exp Value C2	D2	IonScore D2	Exp Value D2	E2	IonScore E2	Exp Value E2	# Missed Cleavages
	RPPYTLASEVPSSASAYQAGYSSYPVR	8	1	1	O74958	Q18(Deamidated)	2905.42	0	2.788e-07	High	22.43	1.17125	High	51.5	0.00145518				High	27.55	0.364857	High	26.55	0.448041	0
	RPAPESHDAPIGR	14	1	1	O74958		1402.72	0	6.741e-07				High	94.27	1.95473e-08	High	82.75	2.75529e-07	High	83.03	2.58326e-07	High	85.77	1.37457e-07	0
	SSYLLSNSSNDSASR	10	1	1	O74958		1587.73	0	2.129e-08				High	89.86	6.13977e-08	High	77.22	1.14087e-06	High	68.86	7.89853e-06	High	56.12	0.000146361	0
	SSYLLSNSSNDSASR	15	1	1	O74958	N7(Deamidated)	1588.71	0	1.217e-06				High	79.53	5.98376e-07	High	78.01	8.72849e-07	High	79.79	5.69377e-07	High	68.41	7.82348e-06	0
	SVWTTHTGEPVASSVLSTSGSNNFSSPLK	14	1	1	O74958		2977.45	0	4.317e-11				High	78.66	2.83861e-06	High	85.69	5.62479e-07	High	50.53	0.00185564	High	74.89	7.01709e-06	0
	TCNLFSAEISEIVSHMDHGSEAR	4	1	1	O74958	T1(Phospho)	2613.11	0	8.209e-08				High	70.43	1.36403e-05	High	62.88	7.9474e-05	High	64.59	5.23911e-05	High	53.91	0.000615965	0
	SVWTTHTGEPVASSVLSTSGSNNFSSPLK	24	1	1	O74958	N23(Deamidated)	2978.43	0	6.799e-10				High	68.24	3.37279e-05	High	53.59	0.00093761	High	49.72	0.00233105	High	49.64	0.00241512	0
	RPPYTLASEVPSSASAYQAGYSSYPVR	17	1	1	O74958		2904.42	0	1.30743e-10				High	66.87	4.2413e-05	High	58.71	0.000277045	High	72.81	1.08438e-05	High	80.64	1.78205e-06	0
	VVLDENGISHR	16	1	1	O74958	N6(Deamidated)	1239.63	0	1.089e-05				High	66.04	9.79365e-06	High	62.17	2.39054e-05	High	63.05	1.81335e-05	High	60.53	3.48736e-05	0
	ESMLYHTSGSYPESQPPYSSYSTDAPHYYHAGSESSAYYDSR	6	1	1	O74958	Q15(Deamidated)	4755.98	0	1.264e-07				High	65.39	0.000107389	High	58.74	0.000500087	High	17.39	6.78216	High	30.38	0.341613	0
	DGMEMMYDEGSR	23	1	1	O74958	M5(Oxidation)	1436.51	0	0.000277				High	61.59	7.52367e-06	High	50.95	8.83879e-05	High	49.03	0.000133153	High	48.35	0.000158646	0
	LADPVVVGSSR	14	1	1	O74958		1099.61	0	4.03e-05				High	60.09	2.00306e-05	High	60.13	1.98469e-05	High	60.07	2.0123e-05	High	59.93	2.07823e-05	0
	DGMEMMYDEGSR	12	1	1	O74958		1420.52	0	2.373e-05				High	59.74	1.47576e-05	High	61.56	9.70543e-06	High	61.29	1.04394e-05	High	51.45	9.59632e-05	0
	ESMLYHTSGSYPESQPPYSSYSTDAPHYYHAGSESSAYYDSR	12	1	1	O74958		4754.97	0	3.157e-07				High	56.7	0.000741231	High	70	3.614e-05	High	67.61	6.42808e-05	High	59.42	0.000418179	0
	SLWPPPSLNESGDTR	19	1	1	O74958		1655.8	0	1.375e-06				High	56.38	0.000155923	High	66.67	1.46389e-05	High	51.48	0.000489315	High	61.66	5.21648e-05	0
	ASHSPSLLEPYAHSLPSSVAPVGAYPEK	11	1	1	O74958	S2(Phospho)	2971.42	0	5.404e-06				High	56.29	0.000535834	High	29.99	0.231533	High	50.14	0.00217814	High	35.55	0.0642201	0
	ISMINPR	32	1	1	O74958	M3(Oxidation)	846.449	0	0.006054				High	55.93	3.24193e-05	High	37.56	0.00222743	High	44.61	0.000439343	High	55.13	3.89766e-05	0
	YFIMLCDNETAIAHAK	4	1	1	O74958	Y1(Phospho)	1919.83	0	0.0003029				High	53.93	0.000326897	High	57.97	0.000128548	High	67.31	1.56334e-05	High	56.34	0.000196271	0
	VVLDENGISHR	12	1	1	O74958		1238.65	0	2.275e-10				High	53.9	0.000139528	High	55.77	8.89896e-05	High	74.8	1.17717e-06	High	51.45	0.000254589	0
	DGMEMMYDEGSR	4	1	1	O74958	M3(Oxidation); M5(Oxidation)	1452.51	0	0.0001585				High	52.74	5.24127e-05				High	17.7	0.167277	High	24.1	0.0389045	0
	ESMLYHTSGSYPESQPPYSSYSTDAPHYYHAGSESSAYYDSR	3	1	1	O74958	M3(Oxidation)	4770.98	0	5.336e-07				High	48.97	0.0046732				High	22.97	1.79887				0
	YVEEEVYR	13	1	1	O74958		1086.51	0	0.00334				High	48.1	0.000269494	High	48.29	0.000257217	High	44.46	0.000621297	High	47.51	0.000307822	0
	SSYLLSNSSNDSASRK	6	1	1	O74958		1715.82	0	5.428e-07				High	47.65	0.0013477	High	83.11	3.86768e-07	High	71.03	6.24383e-06	High	78.56	1.09293e-06	1
	SNTNFSTSR	28	1	1	O74958	N-Term(Acetyl)	1055.48	0	0.0005285				High	46.39	0.000564853	High	47.75	0.000462511	High	46.45	0.000614851	High	44.35	0.00100635	0
	ASTPPPLNFSR	6	1	1	O74958	T3(Phospho)	1266.59	0	0.006886				High	44.59	0.00117293	High	39.66	0.00364984	High	38.06	0.00527562	High	39.4	0.00387502	0
	KTSIWAVK	4	1	1	O74958		932.557	0	0.00207				High	43.41	0.000570046	High	42.44	0.000712705	High	45.26	0.000372315	High	44.78	0.000415824	1
	SIPELPNLEALR	7	1	1	O74958		1351.76	0	3.04e-06				High	42.45	0.000853279	High	44.3	0.000561018	High	45.26	0.000446777	High	39.89	0.00175899	0
	SVWTTHTGEPVASSVLSTSGSNNFSSPLK	1	1	1	O74958	N22(Deamidated); N23(Deamidated)	2979.44	0	2.71e-06				High	42.1	0.0134541										0
	LHGIQPPPK	4	1	1	O74958		986.578	0	0.0005759				High	41.42	0.00158644	High	41.54	0.0015432	High	28.32	0.0323909	High	27.2	0.0419201	0
	SSYLLSNSSNDSASR	6	1	1	O74958	N7(Deamidated); N10(Deamidated)	1589.7	0	0.0002575				High	39.23	0.00594606	High	36.48	0.0114814	High	27.34	0.094188				0
	RESMLYHTSGSYPESQPPYSSYSTDAPHYYHAGSESSAYYDSR	4	1	1	O74958		4911.07	0	3.756e-05				High	37.42	0.0690845	High	21.41	2.89795							1
	ASHSPSLLEPYAHSLPSSVAPVGAYPEK	13	1	1	O74958		2891.45	0	3.457e-07				High	37.03	0.0311496	High	19.54	1.76765	High	17.97	2.50633	High	51.48	0.00116746	0
	SLWPPPSLNESGDTR	8	1	1	O74958	N9(Deamidated)	1656.79	0	0.001958				High	36.41	0.0162163	High	30.57	0.0629248	High	21.01	0.555147	High	26.18	0.178453	0
	YPFVPANTR	6	1	1	O74958	N7(Deamidated)	1065.54	0	0.002768				High	36.04	0.00558748	High	30.79	0.0198833	High	27.63	0.037537				0
	ISMINPR	10	1	1	O74958		830.455	0	0.002418				High	34.53	0.00290706	High	34.47	0.00905687	High	33.1	0.0124159	High	33.28	0.00387663	0
	KASVYFIFVAQQTYNALGYAQVVSDLNSTELPFWSDSSHAGGVR	3	1	1	O74958		4823.38	0	1.516e-15				High	32.55	0.130971	High	56.54	0.000553551	High	58.77	0.000331251				1
	SNTNFSTSRSSK	2	1	1	O74958	N-Term(Acetyl)	1357.63	0	0.0001182				High	32.16	0.0274573										1
	RLADPVVVGSSR	5	1	1	O74958		1255.71	0	0.008448				High	29.12	0.0270028	High	22.24	0.131646	High	30.71	0.0194038	High	41.79	0.00151316	1
	ASVYFIFVAQQTYNALGYAQVVSDLNSTELPFWSDSSHAGGVR	8	1	1	O74958	N26(Deamidated)	4696.27	0	0.0004248				High	27.35	0.540175	High	10.55	25.6341	High	17.58	4.92846	High	14.91	9.76942	0
	HCTDYGHSYEWPYFR	7	1	1	O74958	T3(Phospho)	2040.77	0	0.001182				High	24.1	0.152895	High	22.04	0.249131				High	12.54	2.22039	0
	SNTNFSTSR	10	1	1	O74958	N-Term(Acetyl); N4(Deamidated)	1056.46	0	4.821e-05				High	17.38	0.39487	High	64.17	8.70926e-06	High	16.78	0.477509	High	45.46	0.000647115	0
	ASTPPPLNFSR	4	1	1	O74958		1186.62	0	0.0004444				High	15.01	1.0869	High	33.94	0.0138854	High	26.2	0.0825199	High	18.57	0.480229	0
	ASHSPSLLEPYAHSLPSSVAPVGAYPEK	1	1	1	O74958	N-Term(Acetyl)	2933.46	0	0.005705				High	14.84	5.89095										0
	ESMLYHTSGSYPESQPPYSSYSTDAPHYYHAGSESSAYYDSR	1	1	1	O74958	M3(Oxidation); Q15(Deamidated)	4771.99	0	0.00223				High	11.51	25.8865										0
	HGIASSGSTRYPFVPANTR	4	1	1	O74958		2018.02	0	0.005043				High	10.94	7.6511				High	18.61	1.30904	High	23.42	0.430419	1
	ASVYFIFVAQQTYNALGYAQVVSDLNSTELPFWSDSSHAGGVR	4	1	1	O74958		4695.28	0	8.241e-05							High	49.28	0.00348018	High	36.29	0.071887	High	30.99	0.245774	0
	SIPELPNLEALR	1	1	1	O74958	N7(Deamidated)	1352.74	0	0.0004838							High	45.4	0.000849347							0
	SSPQLSHEDTRHGIASSGSTR	3	1	1	O74958		2210.06	0	0.0002785							High	18.57	1.9084	High	19.25	1.61933	High	25.47	0.386666	1
	YFIMLCDNETAIAHAK	1	1	1	O74958		1839.87	0	0.002174										High	24.95	0.278464				0
	YVEEEVYRRPPYTLASEVPSSASAYQAGYSSYPVR	1	1	1	O74958		3971.91	0	3.523e-07										High	12.65	16.6696				1
	SSYLLSNSSNDSASR	1	1	1	O74958	Y3(Phospho)	1667.7	0	0.0005079													High	54.72	0.000173366	0
	TCNLFSAEISEIVSHMDHGSEAR	1	1	1	O74958	T1(Phospho); N3(Deamidated)	2614.11	0	7.326e-06													High	25.05	0.478446	0
	TLSPPPR	6	1	1	O74958	S3(Phospho)	847.408	0.001	0.03027				High	38.7	0.00181436	High	38.54	0.00183346	High	38.6	0.0018083	High	42.96	0.00066263	0
	YPFVPANTR	7	1	1	O74958		1064.55	0.001	0.01342				High	37.66	0.00341078	High	37.37	0.00364631	High	36.48	0.00447562	High	39.04	0.00248229	0
	RPPYTLASEVPSSASAYQAGYSSYPVRSSPQLSHEDTR	2	1	1	O74958	S28(Phospho)	4221.95	0.001	0.01773							High	15.87	9.85074							1
	SVWTTHTGEPVASSVLSTSGSNNFSSPLKRPAPESHDAPIGR	1	1	1	O74958	N23(Deamidated)	4362.16	0.001	0.01513										High	15.79	6.34829				1
	RTLSPPPR	1	1	1	O74958	S4(Phospho)	1003.51	0.002	0.04392				High	50.43	0.000218734										1
	HGIASSGSTR	1	1	1	O74958		972.486	0.003	0.0474				High	25.52	0.0590544										0
	TSIWAVK	5	1	1	O74958		804.462	0.003	0.05716				High	14.81	0.754894	High	25.89	0.0588689	High	27.48	0.0408212	High	27.67	0.0390738	0
	TCNLFSAEISEIVSHMDHGSEAR	1	1	1	O74958	T1(Phospho); M16(Oxidation)	2629.1	0.003	0.03847							High	12.37	8.36116							0
	ASTPPPLNFSR	2	1	1	O74958	T3(Phospho); N8(Deamidated)	1267.57	0.005	0.0681				High	13.98	1.12185										0
	LCTLINYAIMK	2	1	1	O74958	T3(Phospho)	1362.65	0.005	0.05104										High	34.99	0.0139144	High	33.11	0.0223314	0
	LMVDDPR	1	1	1	O74958		845.419	0.005	0.05089										High	19.22	0.182503				0
	TCNLFSAEISEIVSHMDHGSEAR	1	1	1	O74958	N3(Deamidated); S6(Phospho); M16(Oxidation)	2630.09	0.006	0.08212				High	11.6	9.66488										0
	RESMLYHTSGSYPESQPPYSSYSTDAPHYYHAGSESSAYYDSR	1	1	1	O74958	Q16(Deamidated)	4912.1	0.007	0.09639							High	22.94	2.06109							1
Q09794	Protein ura1 OS=Schizosaccharomyces pombe (strain 972 / ATCC 24843) GN=ura1 PE=1 SV=1 - [PYR1_SCHPO]	51.2	1	76	78	317	659.735	19.61	33	40	1657.95	44.43	67	79	1397.78	44.83	65	89	829.34	27.36	45	52	758.662	34.18	51	57	2244	248.152	5.90967
	Sequence	# PSMs	# Proteins	# Protein Groups	Protein Group Accessions	Modifications	MH+ [Da]	q-Value	PEP	A2	IonScore A2	Exp Value A2	B2	IonScore B2	Exp Value B2	C2	IonScore C2	Exp Value C2	D2	IonScore D2	Exp Value D2	E2	IonScore E2	Exp Value E2	# Missed Cleavages
	SGLLPSLSSSFPLVQSEALGMPR	20	1	1	Q09794	N-Term(Acetyl)	2415.26	0	5.023e-09	High	64.03	3.81924e-05	High	85.27	2.88103e-07	High	69.74	1.06063e-05	High	60.32	8.94595e-05	High	44.45	0.00347975	0
	FASVDEYEK	5	1	1	Q09794		1087.49	0	0.009206	High	59.09	2.50937e-05	High	44.58	0.000714091	High	21.86	0.133584	High	35.4	0.00591226	High	34.26	0.00768695	0
	SDLHVLFAIAHQMR	9	1	1	Q09794		1637.86	0	0.004191	High	57.57	0.000105778	High	51.47	0.000431989	High	25.51	0.170401	High	20.45	0.545	High	26.76	0.127783	0
	MLDDIGVDQPK	5	1	1	Q09794		1230.6	0	0.007582	High	55.85	0.000114537	High	50.39	0.000356047	High	54.4	0.000141419	High	56.08	9.60522e-05	High	51.4	0.00026623	0
	AIDYSNTGFNVK	4	1	1	Q09794		1328.65	0	3.755e-06	High	52.24	0.000198216	High	30.25	0.0318621	High	34.04	0.0133129	High	52.6	0.000188218				0
	LYGSIQSVQFDGHDVFFDGELNFEHTYGR	2	1	1	Q09794	Q9(Deamidated)	3378.55	0	0.001728	High	51.99	0.00192886													0
	ILGTSPEMIDGAENR	6	1	1	Q09794		1602.78	0	2.166e-06	High	45.93	0.00179327	High	85.63	1.97897e-07	High	54.96	0.000219578	High	36.26	0.0172239	High	46.03	0.00175245	0
	STTLASLLLLASLHNR	7	1	1	Q09794		1709.99	0	1.105e-07	High	45.17	0.00058537	High	76.89	4.21568e-07	High	37.76	0.00322427	High	63.96	8.27689e-06	High	55.42	5.91381e-05	0
	EAIPLLLTAVNEGR	7	1	1	Q09794		1495.85	0	0.001203	High	45.04	0.00041986	High	42.52	0.000982375	High	41.47	0.00125106	High	42.1	0.00100813	High	44.97	0.000547682	0
	VSTQLSSAMK	4	1	1	Q09794		1051.54	0	0.01234	High	44.61	0.000728202	High	24.45	0.0750147	High	40.49	0.00255039	High	22.5	0.117811				0
	LLAFWHVELHLVSPEQLALPDDVK	1	1	1	Q09794		2769.5	0	0.02561	High	40.26	0.00534993													0
	SASASSIEEAIK	5	1	1	Q09794		1192.61	0	6.593e-06	High	39.7	0.00353601	High	28.97	0.0432269	High	60.55	2.90746e-05	High	34.57	0.0108583	High	20.11	0.326622	0
	DALMSIDTELQTPSDQR	4	1	1	Q09794		1919.91	0	4.969e-07	High	38.37	0.0150058	High	17.82	1.70813	High	102.19	6.29314e-09				High	59.44	0.00011581	0
	TTAVNVIR	5	1	1	Q09794		873.515	0	0.004439	High	38.19	0.00472561	High	38.16	0.00477364	High	37.89	0.00506358	High	28.02	0.0491426	High	37	0.00621524	0
	LMALELEDK	4	1	1	Q09794		1061.55	0	0.02019	High	35.67	0.00933661				High	31.64	0.0237179	High	27.32	0.0638542	High	17.56	0.441978	0
	LYGSIQSVQFDGHDVFFDGELNFEHTYGR	5	1	1	Q09794		3377.56	0	1.427e-07	High	35.36	0.0894609	High	44.08	0.0119343	High	43.7	0.0129851	High	36.25	0.0726826	High	65.35	8.92587e-05	0
	ILVIDVGMK	5	1	1	Q09794		987.591	0	0.003773	High	33.37	0.0106089	High	32.67	0.0124644	High	32.26	0.0136984	High	22.15	0.140498	High	31.87	0.0149855	0
	DYSSASLADK	5	1	1	Q09794		1056.48	0	0.0003122	High	33.29	0.0111578	High	28.01	0.0369221	High	37.58	0.00412887	High	27.22	0.0442881	High	39.76	0.00246767	0
	DISFPVIVR	4	1	1	Q09794		1045.6	0	0.09671	High	32.8	0.0111784	High	23.04	0.0936077				High	14.3	0.785797	High	16.41	0.486833	0
	FVGNTAFTGFGVR	4	1	1	Q09794		1372.7	0	1.486e-05	High	32.63	0.0260872				High	48.74	0.000642902	High	36.97	0.00939251	High	32.55	0.0256828	0
	EQGIPGIFGIDTR	5	1	1	Q09794		1402.73	0	0.01101	High	32.54	0.0253798	High	24.12	0.175815	High	24.41	0.165002	High	29.4	0.0521262	High	26.58	0.0920903	0
	EIELDAVAR	5	1	1	Q09794		1015.54	0	0.004511	High	32	0.0132817	High	35.32	0.00649221	High	32.44	0.0143111	High	34.62	0.00762768	High	30.26	0.0198268	0
	TFEEAIQK	5	1	1	Q09794		965.494	0	0.002842	High	30.75	0.0134623	High	19.55	0.195769	High	35.97	0.00446421	High	34.53	0.00574365	High	31.38	0.0128453	0
	LGLNIPLNEVK	4	1	1	Q09794		1209.72	0	0.0002114	High	27.66	0.0101123	High	38.74	0.000788591	High	20.9	0.047957	High	16.8	0.123268				0
	DESPINPSSITGLGK	4	1	1	Q09794		1514.77	0	1.106e-05	High	27.24	0.109503	High	27.22	0.111526	High	52.25	0.000372885				High	28.62	0.0801753	0
	TSSSFDAAMQR	5	1	1	Q09794		1200.53	0	6.963e-06	High	24.42	0.0742697	High	59.33	2.4503e-05	High	62.62	1.10497e-05	High	48.25	0.00030224	High	38.42	0.00290637	0
	LFAIANAMASGYSVDR	5	1	1	Q09794		1685.83	0	2.175e-07	High	24.03	0.311351	High	85.8	1.99637e-07	High	43.34	0.00356622	High	43.55	0.00338022	High	32.81	0.0422807	0
	GQILVFTFPTVGNYGVPDR	6	1	1	Q09794		2080.09	0	1.038e-06	High	23.32	0.384574	High	43.44	0.00334465	High	27.81	0.120457	High	51.36	0.000554935	High	53.18	0.000374574	0
	LPGGTIEENR	5	1	1	Q09794		1085.56	0	0.0001062	High	21.72	0.18204	High	57.91	3.35752e-05	High	38.61	0.00285771	High	44.06	0.000814738	High	31.62	0.0142895	0
	VVAVTASASSVNK	5	1	1	Q09794		1232.69	0	1.453e-12	High	21.52	0.227264	High	70.94	2.59735e-06	High	61.15	2.47474e-05	High	81.54	2.26219e-07	High	58.71	4.3404e-05	0
	LHDQDDSGVQLEVDR	5	1	1	Q09794		1725.81	0	0.0001942	High	18.26	1.1293	High	35.71	0.0194956	High	52.18	0.000471258				High	27.11	0.148528	0
	FLPFSTSSTLADKDSLSAVK	2	1	1	Q09794		2114.1	0	0.002339	High	12.1	5.56477				High	12.31	5.27565							1
	TIMVNYNPETVSTDYDEADR	3	1	1	Q09794		2333.03	0	1.242e-08				High	110.04	1.35992e-09	High	18.61	1.83926				High	23.08	0.662777	0
	QLGFADVQIAAFMNSTELAVR	6	1	1	Q09794		2281.17	0	1.767e-09				High	98.7	1.49667e-08	High	77.27	2.08031e-06	High	45.92	0.00277479	High	57.43	0.00020647	0
	VIGVDMISMATDVIMGNPIQPYPDVDLPR	4	1	1	Q09794		3156.58	0	1.301e-08				High	75.43	5.57369e-06	High	37.94	0.0307247	High	17.82	3.20068				0
	ELFVNANDGSNEGIYNTEYPFFSVQFHPESTPGPR	3	1	1	Q09794		3959.82	0	2.313e-07				High	63.71	0.000154833	High	16.88	7.49392				High	13.04	18.287	0
	VVAVTASASSVNKGESLADTIR	1	1	1	Q09794		2175.16	0	5.997e-07				High	62.07	4.56028e-05										1
	VYFLPVNADFVR	3	1	1	Q09794		1439.77	0	0.0005006				High	56.32	8.47045e-05				High	55.44	0.000109589	High	43.85	0.00149591	0
	KNILISIGSYK	4	1	1	Q09794		1235.74	0	0.0003799				High	53.49	3.29069e-05	High	37.37	0.00200638				High	27.38	0.0134365	1
	VLGTPIDTIITTEDR	1	1	1	Q09794		1643.88	0	0.000331				High	49.43	0.000521664										0
	NILISIGSYK	3	1	1	Q09794		1107.64	0	0.0001307				High	46.98	0.000176394	High	47.2	0.000167681	High	41.73	0.0006345				0
	QIDTVAAEFPAFTNYLYTTYNAVEHDIHFNDK	5	1	1	Q09794	N21(Deamidated)	3748.77	0	6.711e-05				High	43.26	0.0155781	High	37.88	0.0543126	High	22.78	1.75119				0
	LAIDYSVPLVTNVK	4	1	1	Q09794		1531.87	0	0.0001588				High	42.12	0.00158351	High	20.78	0.221853	High	40.66	0.00211317	High	40.8	0.00215843	0
	EHPTQAFLDLYTIR	4	1	1	Q09794		1703.88	0	0.0002439				High	41.46	0.00482642	High	28.11	0.0985872	High	27.31	0.120014	High	18.43	0.962496	0
	GVMVLGSGVYR	4	1	1	Q09794		1137.61	0	1.326e-06				High	40.44	0.00392636	High	32.87	0.0200111	High	53.53	0.000192748	High	16.18	1.0471	0
	DTEFLFDVFIDVVK	6	1	1	Q09794		1686.86	0	0.0001182				High	38.07	0.0107843	High	27.57	0.128001	High	32.66	0.0407585	High	10.49	6.58813	0
	HIISVHQVTR	2	1	1	Q09794		1189.68	0	0.0001431				High	38.01	0.00368431	High	45.24	0.000697198							0
	VLILGSGGLSIGQAGEFDYSGSQAIK	3	1	1	Q09794		2567.34	0	7.195e-05				High	38	0.0152863	High	34.92	0.0293439							0
	ALREEGIYTILINPNIATIQTSK	4	1	1	Q09794		2558.41	0	5.538e-05				High	37.46	0.00734943	High	30.73	0.0330504	High	26.43	0.0762158	High	16.14	0.847623	1
	EISEEVDFDQR	2	1	1	Q09794		1366.61	0	0.001475				High	35.12	0.0111355	High	23.94	0.150156							0
	VSALMSPGLPHAAPSLAEAFGQAPENK	2	1	1	Q09794		2690.36	0	5.037e-05				High	34.12	0.0618838	High	34.78	0.0501318							0
	ILDEISGLPK	4	1	1	Q09794		1084.62	0	0.001271				High	32.44	0.0101204	High	33.88	0.00726438	High	22.74	0.0987061	High	21.34	0.136252	0
	QIDTVAAEFPAFTNYLYTTYNAVEHDIHFNDK	3	1	1	Q09794		3747.77	0	4.077e-06				High	30.26	0.293822	High	40.92	0.0260974	High	13.18	15.6802				0
	RPANYISSGYK	3	1	1	Q09794		1255.65	0	0.0007152				High	30.25	0.0262449	High	12.62	1.82703				High	13.57	1.21313	0
	DWSTAFEDIPWK	4	1	1	Q09794		1494.69	0	0.0003525				High	30.21	0.050927	High	47.65	0.000914786	High	14.02	2.023	High	43.83	0.00184437	0
	ETYDGLFISNGPGDPSLMDLVVDR	2	1	1	Q09794		2610.24	0	4.486e-06				High	29.84	0.193188	High	26.19	0.457069							0
	VLGTPIDTIITTEDRELFAR	2	1	1	Q09794		2260.22	0	0.008453				High	29.57	0.0682321	High	28.89	0.0760528							1
	DQGSMLGR	3	1	1	Q09794		863.404	0	0.002855				High	29.33	0.0152269	High	18.32	0.192137	High	23.99	0.080603				0
	VPQFSFSR	3	1	1	Q09794		967.499	0	0.002559				High	28.69	0.0325849				High	30.76	0.020147	High	25.77	0.0704501	0
	VIGVDMISMATDVIMGNPIQPYPDVDLPR	5	1	1	Q09794	N17(Deamidated)	3157.58	0	8.84e-06				High	25.77	0.507188	High	45.9	0.00467298	High	10.45	17.8691				0
	IAANFSPVPIINGGNGSK	3	1	1	Q09794	N12(Deamidated); N15(Deamidated)	1757.9	0	3.601e-06				High	24.42	0.279731	High	36.46	0.0164826				High	22.66	0.397287	0
	QERPDSIYVTFGGQTALNVGIELKDEFEQLGVK	3	1	1	Q09794		3680.88	0	0.005545				High	23.02	0.772273	High	22.11	0.928609				High	15.09	4.24037	1
	MVMHVISEHVENAGVHSGDATLVLPPQDLAPTTIER	2	1	1	Q09794	N12(Deamidated)	3864.94	0	0.001047				High	22.67	1.02662							High	10.31	18.4127	0
	ATGYPLAFTAAK	1	1	1	Q09794		1210.65	0	0.001742				High	19.04	0.33118										0
	SVLQGYSFGADHSVSGELVFQTGMVGYPESLTDPSYR	1	1	1	Q09794	Q21(Deamidated)	3981.87	0	0.005421				High	17.13	6.71648										0
	DSFIVDNSVLASAK	3	1	1	Q09794		1465.76	0	0.0004651				High	16.38	1.56038	High	24.97	0.201241	High	22.93	0.289809				0
	HDISSLPISLLK	4	1	1	Q09794		1322.77	0	0.005213				High	16.23	0.207262	High	13.98	0.347952	High	30.43	0.00787987	High	14.46	0.311544	0
	NPNTENLTSQVSIK	2	1	1	Q09794		1544.79	0	3.63e-07							High	70.16	5.87454e-06				High	26.76	0.117978	0
	EEGIYTILINPNIATIQTSK	1	1	1	Q09794		2218.19	0	0.0006319							High	37.21	0.0126041							0
	DDLNLIVLAK	1	1	1	Q09794		1113.65	0	0.001584							High	36.05	0.00530149							0
	LLAFWHVELHLVSPEQLALPDDVKDDIR	3	1	1	Q09794		3268.73	0	5.45e-07							High	33.79	0.0317133	High	43	0.00404208	High	11.14	6.55684	1
	LYFENIGLETVLDIYEQESSSGIIIAMGGQTANNIALPLHR	1	1	1	Q09794		4490.28	0	2.664e-06							High	33.17	0.0845577							0
	ELFVNANDGSNEGIYNTEYPFFSVQFHPESTPGPR	4	1	1	Q09794	N5(Deamidated)	3960.82	0	0.005151							High	28.33	0.540198				High	19.65	4.01161	0
	ETYDGLFISNGPGDPSLMDLVVDR	1	1	1	Q09794	N10(Deamidated)	2611.22	0	2.476e-05							High	21.6	1.33247							0
	LYFENIGLETVLDIYEQESSSGIIIAMGGQTANNIALPLHR	2	1	1	Q09794	Q17(Deamidated)	4491.3	0	9.799e-05							High	19.6	1.63101				High	10.55	13.5549	0
	LLAFWHVELHLVSPEQLALPDDVKDDIR	1	1	1	Q09794	Q16(Deamidated)	3269.74	0.001	0.01161				High	30.4	0.0647984										1
	DWTPFNGK	2	1	1	Q09794	N6(Deamidated)	965.437	0.001	0.0277				High	22.96	0.0639868	High	10.72	1.05903							0
	QERPDSIYVTFGGQTALNVGIELKDEFEQLGVK	1	1	1	Q09794	N18(Deamidated)	3681.89	0.001	0.0157							High	30.59	0.129505							1
	YLADLPAEEANNEYSLSAHLANNMIDMYINLPSNNR	1	1	1	Q09794		4080.91	0.001	0.009405							High	16.48	8.10784							0
	VSALMSPGLPHAAPSLAEAFGQAPENK	1	1	1	Q09794	Q22(Deamidated)	2691.36	0.001	0.01855							High	16.33	3.57478							0
	AELLPYVK	4	1	1	Q09794		932.545	0.002	0.03638	High	16.17	0.253623	High	18.31	0.154949	High	11.67	0.714808	High	18.99	0.127445				0
	GQILVFTFPTVGNYGVPDRR	3	1	1	Q09794		2236.18	0.002	0.04267				High	29.5	0.0846002				High	10.08	6.81824	High	14.88	2.34063	1
	ILGTSPEMIDGAENR	1	1	1	Q09794	M8(Oxidation)	1618.78	0.002	0.02129							High	12.91	3.76598							0
	IRDQGSMLGR	1	1	1	Q09794		1132.59	0.003	0.04338							High	21.56	0.281737							1
	AMISTGFR	3	1	1	Q09794		882.451	0.004	0.1838	High	25.83	0.0395742	High	23.97	0.105829	High	26.23	0.0628932							0
	YLADLPAEEANNEYSLSAHLANNMIDMYINLPSNNR	2	1	1	Q09794	N12(Deamidated)	4081.91	0.004	0.05173							High	26.85	0.735379							0
	DWTPFNGK	1	1	1	Q09794		964.453	0.004	0.08464													High	18.71	0.237544	0
	YGLYIR	2	1	1	Q09794		784.435	0.005	0.09209				High	21.58	0.0556019							High	25.13	0.0245522	0
	SFPFVSK	1	2	2	O94313;Q09794		811.435	0.006	0.1124													High	14.56	0.558163	0
	LMGLIR	1	1	2	Q09794;Q9HFR0		702.433	0.009	0.1439				High	16.66	0.0701267										0
O14187	Pre-mRNA-splicing factor spp42 OS=Schizosaccharomyces pombe (strain 972 / ATCC 24843) GN=spp42 PE=1 SV=1 - [SPP42_SCHPO]	59.59	1	107	107	563					3252.44	59.16	103	192	1250.02	45.66	80	101	2864.76	55.23	97	173	1388.19	46.25	79	97	2363	274.382	8.89502
	Sequence	# PSMs	# Proteins	# Protein Groups	Protein Group Accessions	Modifications	MH+ [Da]	q-Value	PEP	A2	IonScore A2	Exp Value A2	B2	IonScore B2	Exp Value B2	C2	IonScore C2	Exp Value C2	D2	IonScore D2	Exp Value D2	E2	IonScore E2	Exp Value E2	# Missed Cleavages
	AAVMNDILDMIPEGIR	8	1	1	O14187		1757.89	0	3.045e-07				High	90.38	8.01235e-08	High	53.29	0.000392397	High	82.43	4.91757e-07	High	76.8	1.6683e-06	0
	WNTALIALMTYYR	8	1	1	O14187		1615.83	0	6.51e-07				High	81.99	4.24981e-07	High	46.7	0.00137257	High	64.74	2.25616e-05	High	77.69	1.09449e-06	0
	VDVIQALGGVEGILEHTMFK	6	1	1	O14187		2156.14	0	8.142e-18				High	77.66	1.23405e-06	High	53.74	0.000314677	High	94.46	2.58904e-08	High	58.8	9.41235e-05	0
	FGDYDSHDIER	6	1	1	O14187		1353.57	0	1.031e-05				High	72.22	1.56545e-06	High	36.8	0.00532771	High	44.64	0.000876073				0
	SLTTLEWEDTFPSVYSK	3	1	1	O14187		2002.96	0	3.617e-07				High	71.62	7.74734e-06				High	49.6	0.00122202	High	33.74	0.0475291	0
	ADWWTSVAHFNR	7	1	1	O14187		1489.7	0	4.712e-06				High	71.56	4.36395e-06	High	49.85	0.000565705	High	54.84	0.00020506	High	32.11	0.0351881	0
	LGYQLLSDLR	4	1	1	O14187		1177.66	0	6.193e-08				High	69.71	2.42675e-06	High	62.83	1.18311e-05	High	83.21	1.08399e-07	High	64.48	8.09144e-06	0
	QTDTGITHFR	7	1	1	O14187		1175.58	0	7.891e-05				High	66.59	6.75384e-06	High	47.41	0.000559179	High	44.57	0.00107535	High	60.37	2.82846e-05	0
	IAFPYLYNSR	5	1	1	O14187	N8(Deamidated)	1244.63	0	0.0001134				High	66.44	1.00555e-05	High	16.78	0.92983	High	35.67	0.0100277				0
	ELGGLGMLSMGHVLIPQSDLR	6	1	1	O14187		2223.16	0	1.293e-07				High	65.91	2.24521e-05	High	63.22	4.04966e-05	High	50.87	0.000728843	High	43.65	0.003806	0
	LPHDLQPSILEDLEPLGWIHTQSSELPYLSSVDVTTHAK	6	1	1	O14187		4366.22	0	4.735e-08				High	64.44	5.71462e-05				High	60.59	0.000124529	High	40.43	0.0145098	0
	VTEDGINQFGNR	6	1	1	O14187		1349.65	0	6.685e-10				High	64.28	1.52473e-05	High	63.74	1.74139e-05	High	65.43	1.18291e-05	High	53	0.000198971	0
	LPHDLQPSILEDLEPLGWIHTQSSELPYLSSVDVTTHAK	5	1	1	O14187	Q22(Deamidated)	4367.23	0	1.204e-09				High	64.24	5.96699e-05				High	33.66	0.0664303	High	28.95	0.19752	0
	ATEPQMVLFNLYDDWLQSVSSYTAFSR	4	1	1	O14187		3168.49	0	4.148e-07				High	63.85	0.000109886	High	57.98	0.000423926	High	60.72	0.000225532	High	18.4	3.79139	0
	NIYVNSDNISETFPYTYILPQNLLR	7	1	1	O14187		2987.52	0	1.366e-06				High	62.21	9.32721e-05	High	43.65	0.00732719	High	33.35	0.0734492	High	25.05	0.497672	0
	KNNINVASLTNSEVR	4	1	1	O14187		1658.88	0	2.314e-05				High	61.22	4.28515e-05	High	14.56	2.03668	High	44.6	0.00196773	High	37.88	0.00825238	1
	TAEEVAALIR	4	1	1	O14187		1072.6	0	8.264e-05				High	60.8	2.15427e-05	High	42.55	0.00148982	High	60.55	2.28192e-05	High	47.18	0.000513021	0
	LGNIDAYQLADGLHYIFNHVGQLTGMYR	12	1	1	O14187	Q8(Deamidated)	3180.57	0	1.942e-18				High	59.27	0.000245185	High	24.1	0.783148	High	64.15	7.94759e-05	High	11.58	15.8848	0
	LRFPPFDDEEPPFSIDQLLDLEPLEAIR	3	1	1	O14187		3311.68	0	3.173e-06				High	58.61	0.000224485	High	26.9	0.338316	High	57.08	0.000312925				1
	DNPNLLFSMTGFEVR	6	1	1	O14187		1739.84	0	1.591e-06				High	57.54	0.000138932	High	57.83	0.000125343	High	47.46	0.00131823	High	63.17	3.59051e-05	0
	IQGFFLVPEEGVWNYNFNGASFSPK	6	1	1	O14187	N14(Deamidated)	2848.38	0	0.000114				High	57.46	0.000379227				High	57.45	0.000393233	High	26.62	0.485085	0
	VDSHQDLELR	6	1	1	O14187		1211.6	0	0.0009055				High	56.79	7.22469e-05				High	45.53	0.000965649				0
	FGNAFHLMR	6	1	1	O14187		1092.54	0	0.0005614				High	55.07	9.2418e-05	High	33.32	0.0138512	High	40.13	0.00282904	High	34.45	0.0106779	0
	VDVIQALGGVEGILEHTMFK	3	1	1	O14187	M18(Oxidation)	2172.14	0	1.329e-05				High	53.92	0.000334747	High	16.19	1.99081	High	43.75	0.00344526				0
	DGPYVTADEAVAIYTTFVHWLESR	4	1	1	O14187		2740.32	0	1.62e-07				High	53.6	0.000865174	High	62.85	0.000105187	High	55.13	0.000614418	High	53.81	0.000841179	0
	AISSISLPLR	4	1	1	O14187		1056.64	0	0.0003482				High	52.94	7.41913e-05	High	44.88	0.000474627	High	45.07	0.000454311	High	44.51	0.000516836	0
	RLTLEDLEDSWDR	7	1	1	O14187		1647.8	0	4.45e-05				High	52.69	0.000374636	High	42.75	0.00376397	High	56.26	0.000172002	High	32.87	0.0361233	1
	TFEGNLTTKPINGAIFIFNPR	5	1	1	O14187	N12(Deamidated)	2351.24	0	2.297e-08				High	52.04	0.000527021	High	20.91	0.560374	High	56.57	0.000185817				0
	VLYHVTGAITFVNESPR	5	1	1	O14187		1903.01	0	5.233e-06				High	51.6	0.000479785	High	41.8	0.00457861	High	41.29	0.00517141	High	48.55	0.000931378	0
	LIVDSHVQYR	6	1	1	O14187		1229.66	0	0.0003806				High	51.51	0.000250743	High	28.69	0.0479986	High	52.1	0.000204093	High	34.2	0.0134967	0
	VDLTLLNR	4	1	1	O14187		943.557	0	0.00636				High	51.17	0.000166516	High	41.48	0.00154689	High	48.03	0.000349424	High	45.35	0.00063454	0
	AVTLTVSYIPGSISLAAYTVSK	7	1	1	O14187		2241.24	0	1.2e-07				High	51.1	0.000345818	High	29.89	0.0457954	High	36.31	0.0105248	High	39.58	0.00496794	0
	FPPFDDEEPPFSIDQLLDLEPLEAIR	4	1	1	O14187		3042.49	0	3.108e-08				High	49.99	0.00217851	High	26.27	0.502782	High	41.79	0.0142542	High	18.29	3.0614	0
	ELGGLGMLSMGHVLIPQSDLR	1	1	1	O14187	M10(Oxidation)	2239.16	0	0.0001602				High	49.73	0.00100668										0
	FPPAVFYSPK	8	1	1	O14187		1152.61	0	8.527e-07				High	49.52	0.00053051	High	23.13	0.231287	High	54.81	0.000156926	High	21.8	0.296321	0
	LMSLLMDTNLASYASAK	3	1	1	O14187		1828.92	0	6.005e-15				High	48.4	0.00134426				High	86.1	2.14296e-07	High	70.17	8.39488e-06	0
	LGYQLLSDLRDDNYFYLFNDNSFFTAK	3	1	1	O14187	N19(Deamidated)	3280.57	0	1.147e-05				High	48.22	0.00391341				High	13.26	12.2453				1
	TILQHLSEAWR	9	1	1	O14187		1353.73	0	0.0001925				High	47.58	0.000510653	High	36.3	0.00639974	High	36.91	0.00595835	High	39.26	0.00350988	0
	ISLIQIFR	4	1	1	O14187		989.614	0	0.006814				High	47.29	7.65216e-05	High	34.43	0.00147837	High	43.05	0.000203135	High	41.52	0.000288924	0
	KGMLDPLEVHLLDFPNITIK	7	1	1	O14187		2293.26	0	2.998e-05				High	46.48	0.000898497	High	26.07	0.0987454	High	44.68	0.00134461	High	21.42	0.294212	1
	DMSHTNSYGLVR	5	1	1	O14187		1379.64	0	4.18e-05				High	46.46	0.000953482				High	41.07	0.00319295	High	29.03	0.0523859	0
	YIQPWESEFIDSQR	7	1	1	O14187		1797.84	0	0.000106				High	44.6	0.00300794	High	57.5	0.000153288	High	57.95	0.000144613	High	49.45	0.000994837	0
	FTLWWSPTINR	6	1	1	O14187		1420.74	0	2.358e-05				High	44.52	0.00181183	High	20.78	0.441198	High	47.59	0.000918803	High	21.03	0.415729	0
	EELALVEQAYDNPHEMLSQIK	4	1	1	O14187		2457.19	0	2.277e-06				High	44.13	0.00611812	High	38.04	0.0248745	High	48.24	0.0023815	High	61.9	0.000102853	0
	LTLEDLEDSWDR	4	1	1	O14187		1491.7	0	0.001598				High	43.87	0.00236893	High	44.39	0.00207432	High	36.35	0.0134641	High	41.15	0.00442384	0
	NNVVLSYK	3	1	1	O14187	N2(Deamidated)	937.499	0	0.002125				High	43.7	0.000607876				High	47.89	0.000258462				0
	LRFPPFDDEEPPFSIDQLLDLEPLEAIR	4	1	1	O14187	Q17(Deamidated)	3312.68	0	0.0002136				High	43.64	0.00741761	High	20.61	1.45942	High	20.39	1.49823				1
	EAAISTPELLDLLVK	6	1	1	O14187		1611.92	0	1.121e-05				High	43.42	0.00137634	High	14.04	1.19323	High	21.01	0.24409	High	27.31	0.0561986	0
	GLQLYASEPQEQYLSSSNYAELFSNQIQLFVDDTNVYR	24	1	1	O14187	Q10(Deamidated)	4431.11	0	2.538e-05				High	42.95	0.0179171	High	36.09	0.086445	High	14.38	13.3609				0
	ENAQVTAVTTK	4	1	1	O14187		1161.61	0	0.0001828				High	42.53	0.00203004	High	21.5	0.266188	High	24.81	0.114473	High	21.53	0.265058	0
	GSELQLPFQAIIK	3	1	1	O14187		1443.82	0	4.34e-05				High	42.27	0.00172541	High	31.02	0.0269226				High	16.24	0.705922	0
	ATEIAGPADAPNDFLHFK	4	1	1	O14187		1913.94	0	1.001e-06				High	41.49	0.00753217	High	31.02	0.0834957	High	18.9	1.30049	High	42.07	0.00651602	0
	VPGLPAPIENMILR	6	1	1	O14187		1519.87	0	0.0009893				High	40.62	0.00216307	High	35.57	0.00691943	High	32.83	0.0135511	High	21.53	0.165222	0
	ENHVWPNLDDQQWLDVEPK	2	1	1	O14187		2362.11	0	2.658e-06				High	40.23	0.0150751				High	33.51	0.0737561				0
	ALEDTPHVNGPTYR	4	1	1	O14187		1569.77	0	0.0002279				High	40.03	0.00627649	High	15.05	1.96318	High	27.01	0.124019				0
	EVGIEFMDMYSHLIPVYSVDPMEK	4	1	1	O14187		2829.32	0	1.166e-10				High	39.94	0.0235025	High	18.7	3.06349	High	44.22	0.0086758	High	16.57	5.15815	0
	QQIAEIEK	4	1	1	O14187		958.52	0	0.002181				High	39.05	0.00286238	High	41.5	0.00162828	High	42.18	0.00139228	High	15.94	0.585771	0
	FLNENPDPTNSNVVNYSK	4	1	1	O14187		2051.97	0	1.116e-05				High	38.99	0.0152113				High	20.12	1.1814	High	21.26	0.899674	0
	LLVLALER	4	1	1	O14187		926.604	0	0.002176				High	38.89	0.000387366	High	28.47	0.00426699	High	35.07	0.000933515	High	30.43	0.0027172	0
	FGNAFHLMR	4	1	1	O14187	N3(Deamidated)	1093.52	0	0.002841				High	38.59	0.00316837				High	38.64	0.00311158	High	22.53	0.12789	0
	SGLNQIPNR	4	1	1	O14187		998.538	0	0.002536				High	38.42	0.00146038	High	26.17	0.0245169	High	29.29	0.0119527	High	22.12	0.0690482	0
	FVTISDLR	3	1	1	O14187		950.531	0	0.002217				High	37.91	0.00221677				High	38.36	0.00193293	High	36.69	0.00286076	0
	VIEPHFIAQWGTMWMMMR	4	1	1	O14187		2264.06	0	3.093e-05				High	37.67	0.0233161	High	30.75	0.11586	High	37.28	0.0257593	High	39.75	0.0149673	0
	ANVYVGFQVQLDLTGIMMHGK	3	1	1	O14187		2321.18	0	2.34e-06				High	37.26	0.0233787				High	46.97	0.00248123	High	58.3	0.000177863	0
	ATEPQMVLFNLYDDWLQSVSSYTAFSR	1	1	1	O14187	M6(Oxidation)	3184.5	0	4.518e-05				High	36.65	0.0574094										0
	DGVWNLTDNR	3	1	1	O14187		1189.56	0	2.013e-05				High	36.35	0.00723027	High	29.16	0.0388891	High	37.11	0.00623488				0
	IQGFFLVPEEGVWNYNFNGASFSPK	4	1	1	O14187		2847.38	0	2.379e-05				High	36.27	0.0484606	High	24.56	0.704265	High	42.01	0.0132448	High	44.68	0.00702603	0
	GMLDPLEVHLLDFPNITIK	3	1	1	O14187		2165.17	0	6.918e-05				High	36.15	0.0131037	High	44.59	0.0018767	High	32.71	0.0284776				0
	GLQLYASEPQEQYLSSSNYAELFSNQIQLFVDDTNVYR	5	1	1	O14187		4430.11	0	3.098e-07				High	34.81	0.119842	High	29.32	0.402951	High	78.76	4.62532e-06				0
	MDLDEEDDAPVMDWFYENK	4	1	1	O14187		2361.95	0	0.0004291				High	34.65	0.0314661				High	27.62	0.161392				0
	TQVAGYMYGK	3	1	1	O14187		1117.53	0	0.002955				High	34.42	0.0120711	High	15.15	1.03562	High	27.48	0.0585075				0
	LGNIDAYQLADGLHYIFNHVGQLTGMYR	4	1	1	O14187	Q8(Deamidated); N18(Deamidated)	3181.56	0	2.372e-05				High	34.09	0.0857092				High	26	0.557513				0
	DIILGMTITAPSLQR	4	1	1	O14187		1628.9	0	3.947e-05				High	34.01	0.0172183	High	52.07	0.00027163	High	61.95	2.76687e-05	High	63.01	2.12765e-05	0
	DDNYFYLFNDNSFFTAK	1	1	1	O14187		2120.92	0	2.681e-05				High	33.34	0.0506084										0
	QGYNMLQLLIHR	4	1	1	O14187		1485.8	0	0.0001769				High	32.87	0.0280672	High	48.88	0.000698219	High	33.95	0.0217266	High	55.78	0.000144143	0
	KFVTISDLR	3	1	1	O14187		1078.63	0	0.002199				High	32.79	0.00515497				High	47.23	0.00018545	High	25.16	0.0298694	1
	SGMTTNGEHLIPNLYR	3	1	1	O14187		1802.89	0	1.544e-05				High	32.69	0.0455376				High	26.42	0.196451	High	20.31	0.796097	0
	NMDINSDEAIGYEPSMAEK	4	1	1	O14187		2113.9	0	1.176e-06				High	31.75	0.0635929	High	23.81	0.398442	High	40.82	0.0080062	High	15.71	2.59673	0
	FEPLYKDEAPEMEDWNEFNDIYK	2	1	1	O14187		2922.28	0	0.001077				High	31.36	0.164945	High	12.44	12.8715							1
	TTNVHGDEMVVTTTSAYENEK	4	1	1	O14187		2326.05	0	3.883e-09				High	31.21	0.112806	High	20.33	1.38051	High	47.91	0.002381	High	38.24	0.0225403	0
	DVLDNTTTNK	3	1	1	O14187		1120.55	0	4.152e-05				High	29.89	0.0251798	High	13.26	1.40203	High	40.03	0.00309356				0
	SGMTTNGEHLIPNLYR	4	1	1	O14187	N6(Deamidated)	1803.87	0	0.0003997				High	29.84	0.0941557				High	18.19	1.42982	High	15.44	2.63756	0
	SVALSEYHQPSNVFVPPEDPDLPAFFWDPIINPITSR	6	1	1	O14187		4195.08	0	1.226e-05				High	28.85	0.315497	High	29.54	0.292274	High	36.88	0.0508381	High	12.1	13.6668	0
	EGIEWGSK	3	1	1	O14187		905.436	0	0.008047				High	27.93	0.0306828	High	37.34	0.00351475				High	18.16	0.31086	0
	ASLPPGNPPPPPPPPGFEPPSQPPPPPPPGYVK	2	1	1	O14187	N-Term(Acetyl); Q22(Deamidated)	3343.72	0	0.0009748				High	27.71	0.229837										0
	LGNIDAYQLADGLHYIFNHVGQLTGMYR	8	1	1	O14187		3179.58	0	2.572e-12				High	27.56	0.386204	High	29.05	0.269251	High	45.78	0.0056574	High	38.96	0.0279463	0
	FNTGPVGK	4	1	1	O14187		819.436	0	0.004129				High	27.34	0.0367158	High	29.93	0.0202233	High	29.45	0.0225867	High	32.56	0.0110371	0
	ILSSHPEWDTK	5	1	1	O14187		1312.65	0	0.002426				High	27	0.0868937	High	23.28	0.204639	High	12.9	1.88989	High	17.65	0.639062	0
	ASGFEESMK	4	1	1	O14187		985.429	0	0.005625				High	26.36	0.0469349	High	23.44	0.0919382	High	24.28	0.0739035	High	26.01	0.0354614	0
	NNVVLSYK	3	1	1	O14187		936.515	0	0.002186				High	24.6	0.0499301				High	19.85	0.155271	High	20.8	0.124765	0
	ATGFPSWEGLFWEK	4	1	1	O14187		1654.79	0	0.002336				High	24.07	0.274023	High	15.06	2.17231	High	23.41	0.308053	High	34.47	0.0239551	0
	NIYVNSDNISETFPYTYILPQNLLR	12	1	1	O14187	N1(Deamidated)	2988.51	0	4.806e-05				High	22.49	1.10022	High	26.86	0.334646	High	31.97	0.106164	High	23.58	0.828823	0
	DMSHTNSYGLVR	2	1	1	O14187	M2(Oxidation)	1395.63	0	0.001731				High	20.36	0.360816				High	35.54	0.0110166				0
	HLFPSWVKPSDSEPPPLLVYK	3	1	1	O14187		2436.3	0	5.59e-06				High	19.12	0.931933				High	21.4	0.53898				0
	LNLPQMANLHR	3	1	1	O14187		1306.71	0	0.00121				High	18.38	0.617147	High	15.76	1.13352				High	13.46	1.93175	0
	ASLPPGNPPPPPPPPGFEPPSQPPPPPPPGYVK	2	1	1	O14187	N-Term(Acetyl)	3342.73	0	0.003617				High	17.92	2.05427										0
	ALEDTPHVNGPTYR	1	1	1	O14187	N9(Deamidated)	1570.75	0	0.003421				High	16.19	1.41978										0
	NNINVASLTNSEVR	4	1	1	O14187		1530.79	0	0.0007637				High	16.09	1.48852	High	25.54	0.160292	High	22.59	0.319193	High	33.16	0.0261576	0
	LLENMPMPWEEYR	4	1	1	O14187		1707.79	0	2.483e-05				High	15.56	2.04587	High	27.78	0.122709	High	33.82	0.0307273	High	22.59	0.405394	0
	LGYQLLSDLRDDNYFYLFNDNSFFTAK	3	1	1	O14187		3279.56	0	3.635e-07				High	14.46	9.54685	High	34.58	0.092083	High	38.78	0.0349163				1
	QILMSSGSTTFTK	2	1	1	O14187	M4(Oxidation)	1416.7	0	1.144e-05				High	14.09	2.0316				High	31.62	0.0358788				0
	TFEGNLTTKPINGAIFIFNPR	4	1	1	O14187		2350.25	0	1.83e-05				High	13.85	2.67039	High	49.55	0.000779195	High	39.87	0.00657386	High	50.87	0.000587658	0
	FPPFDDEEPPFSIDQLLDLEPLEAIR	2	1	1	O14187	Q15(Deamidated)	3043.5	0	0.0001306				High	13.49	9.56539							High	14.5	7.59655	0
	LGNIDAYQLADGLHYIFNHVGQLTGMYR	1	1	1	O14187	M26(Oxidation)	3195.57	0	0.0005746				High	11.61	15.7133										0
	VIHTSVWAGQK	4	1	1	O14187		1225.67	0	0.002173				High	10.66	1.54193	High	18.03	0.281743	High	28.33	0.023209				0
	ANVYVGFQVQLDLTGIMMHGK	1	1	1	O14187	Q10(Deamidated)	2322.18	0	3.944e-06										High	57.11	0.000247353				0
	QILMSSGSTTFTK	2	1	1	O14187		1400.71	0	1.471e-09										High	49.25	0.000575235	High	15.46	1.37672	0
	SVALSEYHQPSNVFVPPEDPDLPAFFWDPIINPITSR	1	1	1	O14187	N32(Deamidated)	4196.08	0	5.845e-05										High	36.35	0.0577611				0
	NIYVNSDNISETFPYTYILPQNLLR	1	1	1	O14187	N5(Deamidated); N8(Deamidated)	2989.5	0	1.021e-06										High	34.54	0.0597829				0
	NMDINSDEAIGYEPSMAEK	1	1	1	O14187	N5(Deamidated)	2114.9	0	1.379e-05										High	32.97	0.0477157				0
	SKADWWTSVAHFNR	1	1	1	O14187		1704.83	0	0.002069										High	11.37	5.31775				1
	SYLGALK	3	1	1	O14187		751.435	0.001	0.01623				High	37.56	0.00127156				High	37.1	0.00141364	High	35.98	0.00182952	0
	AVFWEIR	4	1	1	O14187		920.499	0.001	0.005001				High	37.07	0.00313156	High	36.94	0.00322672	High	33.91	0.00648277	High	33.69	0.00681963	0
	LWQLNNYR	3	1	1	O14187		1106.57	0.001	0.01766				High	33.48	0.00978265	High	32.86	0.0112838	High	33.34	0.0103812				0
	TAQAFIR	4	1	1	O14187		806.452	0.001	0.01811				High	29.56	0.0145521	High	34.83	0.0043244	High	27.6	0.0228521	High	29.62	0.0143524	0
	GIVPLLER	4	1	1	O14187		896.556	0.001	0.01073				High	29.38	0.00322967	High	31.02	0.0022139	High	31.63	0.00192379	High	19.1	0.0344475	0
	NNPFWWTSQR	4	1	1	O14187		1335.62	0.001	0.01826				High	28.66	0.0437704	High	20	0.319	High	23.3	0.145232	High	25.5	0.0900473	0
	NNINVASLTNSEVR	4	1	1	O14187	N2(Deamidated)	1531.78	0.001	0.0199				High	26.54	0.129432				High	24.81	0.201195				0
	WLGNLLAR	4	1	1	O14187		942.552	0.001	0.01162				High	24.8	0.0407291	High	36.56	0.00271585	High	22.85	0.0638124	High	23.88	0.0503391	0
	FLNENPDPTNSNVVNYSK	1	1	1	O14187	N12(Deamidated)	2052.95	0.001	0.01543				High	19.54	1.29739										0
	SLPVEEQPR	4	1	1	O14187		1054.55	0.001	0.02586				High	19.33	0.199524	High	16.17	0.394928	High	18.8	0.215535	High	12.63	0.892314	0
	TTNVHGDEMVVTTTSAYENEK	1	1	1	O14187	M9(Oxidation)	2342.05	0.001	0.02867				High	15.28	4.13742										0
	YLPHAVLK	2	1	1	O14187		940.562	0.001	0.01359				High	14.2	0.271835				High	16.12	0.174705				0
	DIILGMTITAPSLQR	2	1	1	O14187	M6(Oxidation)	1644.9	0.001	0.008635				High	13.03	2.18258				High	24.58	0.157274				0
	DLILADYAK	1	1	1	O14187		1021.56	0.001	0.01032							High	36.19	0.00387102							0
	INDLILR	2	1	1	O14187		856.525	0.002	0.04321				High	45.16	0.00029717				High	45.25	0.000291075				0
	LWQLNNYR	4	1	1	O14187	N5(Deamidated)	1107.56	0.002	0.03745				High	29.97	0.0225553				High	20.07	0.220418	High	15.72	0.636302	0
	INTLFQK	4	1	1	O14187		863.498	0.002	0.02289				High	28.62	0.0176564	High	24.08	0.0502231	High	28.77	0.017057	High	23.11	0.0627918	0
	VWAEYAMK	3	1	1	O14187		997.481	0.002	0.04326				High	27.19	0.0445951				High	19.95	0.247837	High	20.66	0.20058	0
	DNPNLLFSMTGFEVR	1	1	1	O14187	M9(Oxidation)	1755.85	0.002	0.02104										High	21.99	0.498341				0
	LNLPQMANLHR	1	1	1	O14187	M6(Oxidation)	1322.7	0.002	0.01962										High	17.14	0.880978				0
	TGQLFLK	4	1	1	O14187		806.477	0.003	0.02531				High	23.89	0.0424652	High	17.1	0.202784	High	25.29	0.0307633	High	20.37	0.0955066	0
	LRDLILADYAK	2	1	1	O14187		1290.74	0.003	0.02419				High	23.23	0.07439				High	25.85	0.0405625				1
	VWLFFLR	3	1	1	O14187		980.571	0.004	0.05996				High	23.06	0.0343546	High	24.36	0.0254674				High	20.6	0.060532	0
	YWIDVQLR	2	1	1	O14187		1092.58	0.005	0.04727				High	25.47	0.0739278				High	24.42	0.0910753				0
	FQPIPFPPLSYK	1	1	1	O14187		1433.78	0.005	0.06845				High	14.89	1.37844										0
	QRVDSHQDLELR	1	1	1	O14187		1495.76	0.007	0.07179										High	21.89	0.448793				1
	FEPLYKDEAPEMEDWNEFNDIYK	1	1	1	O14187	M12(Oxidation)	2938.28	0.008	0.1162				High	12.56	11.7636										1
	HLIYYR	1	1	1	O14187		864.473	0.008	0.122							High	18.64	0.124463							0
	RFQPIPFPPLSYK	1	1	1	O14187		1589.88	0.009	0.1326				High	16	0.866601										1
O14460	Elongation factor 2 OS=Schizosaccharomyces pombe (strain 972 / ATCC 24843) GN=eft201 PE=1 SV=2 - [EF2_SCHPO]	57.6	1	38	39	138	187.64	14.96	10	10	847.86	49.88	30	36	1135.48	51.66	36	45	343.751	33.37	19	22	444.971	38.12	23	25	842	93.1716	6.43018
	Sequence	# PSMs	# Proteins	# Protein Groups	Protein Group Accessions	Modifications	MH+ [Da]	q-Value	PEP	A2	IonScore A2	Exp Value A2	B2	IonScore B2	Exp Value B2	C2	IonScore C2	Exp Value C2	D2	IonScore D2	Exp Value D2	E2	IonScore E2	Exp Value E2	# Missed Cleavages
	EGPMFEENLR	5	1	1	O14460		1221.56	0	0.0001829	High	47.25	0.000498225	High	50.93	0.000213917	High	35.5	0.00746871	High	25.87	0.0692347	High	35.77	0.00758795	0
	AYLPVNESFGFTGELR	7	1	1	O14460		1799.9	0	3.944e-06	High	46.49	0.00190057	High	70.04	8.65492e-06	High	77.53	1.50908e-06	High	30.69	0.0743477				0
	VAFTPEEVR	5	1	1	O14460		1047.55	0	0.00246	High	40.04	0.00285855	High	48.9	0.000383254	High	49.67	0.000320987	High	45.9	0.000764693	High	41.41	0.00215024	0
	FSVSPVVQVAVEVK	6	1	1	O14460		1487.85	0	4.663e-05	High	39	0.00346204	High	42.15	0.00165184	High	36.32	0.00632367	High	23.74	0.114332	High	27.5	0.0479246	0
	AVAYLNEIKDSVVAAFAWASK	4	1	1	O14460		2253.19	0	3.876e-06	High	36.97	0.0165549	High	50.63	0.000678135	High	49.38	0.000929107				High	26.69	0.173788	1
	LWGENYFNPK	3	1	1	O14460		1267.61	0	0.001336	High	36.42	0.0118464	High	40.53	0.00458047	High	48.27	0.000773723							0
	NMSVIAHVDHGK	5	1	1	O14460		1307.65	0	0.1012	High	26.27	0.0984319	High	25.43	0.118147	High	22.09	0.257713	High	15.01	1.3109	High	12.81	2.18341	0
	DSVVAAFAWASK	5	1	1	O14460		1251.64	0	0.0001367	High	21.93	0.235003	High	37.83	0.00604052	High	24.58	0.127143	High	23.06	0.239741	High	33.85	0.0151034	0
	SGTLTTSEVAHNMK	7	1	1	O14460		1475.72	0	2.655e-11	High	18	0.833654	High	42.69	0.0028313	High	42.56	0.00294229	High	68.5	7.43701e-06	High	20.12	0.511665	0
	FLPAADALMEMIVLHLPSPK	6	1	1	O14460		2193.18	0	2.163e-06	High	15.67	1.61256	High	36.34	0.0129841	High	26.83	0.132691	High	30.09	0.0587204	High	16.69	1.29645	0
	IFMTAEPMSEELSVAIETGHVNPR	4	1	1	O14460		2658.3	0	1.39e-10				High	102.3	1.10055e-08	High	59.91	0.000191222	High	69.88	1.96094e-05	High	70.03	1.86309e-05	0
	EPADGTDFLVNLIDSPGHVDFSSEVTAALR	3	1	1	O14460	N11(Deamidated)	3173.53	0	1.748e-09				High	70.67	2.0736e-05	High	60.67	0.000207017	High	21.86	1.57075				0
	VVYASTLLASPIIQEPVFLVEIQVSENAMGGIYSVLNK	8	1	1	O14460		4092.2	0	3.688e-06				High	69.37	6.4222e-06	High	53.15	0.000278883	High	19.99	0.570813	High	24.39	0.207432	0
	KDEVFTLLSK	4	1	1	O14460		1179.66	0	0.0001136				High	60.49	2.00994e-05	High	22.75	0.11998	High	28.34	0.0312162	High	45.24	0.00067326	1
	STAISLFAEMTDDDMK	3	1	1	O14460		1774.79	0	3.297e-06				High	59.3	9.17595e-05	High	25.95	0.203532				High	32.66	0.0391325	0
	GTVAFASGLHGWAFTVR	4	1	1	O14460		1776.92	0	2.008e-08				High	58.89	9.12246e-05	High	55.05	0.000219607				High	37.92	0.0113812	0
	ALLELQISQEELYQNFAR	6	1	1	O14460		2165.12	0	4.062e-09				High	58.54	0.00013485	High	107.98	1.47518e-09	High	54.97	0.000288807	High	64.88	3.07533e-05	0
	FNILDVVLHADAIHR	3	1	1	O14460		1732.95	0	4.396e-05				High	50.66	0.000352625	High	43.29	0.00210263				High	29.14	0.0486377	0
	IFDAVMNSR	4	1	1	O14460		1052.52	0	0.0001218				High	48.46	0.000583786	High	47.62	0.00070836	High	59.68	4.5373e-05	High	47.32	0.000781264	0
	KFLPAADALMEMIVLHLPSPK	6	1	1	O14460		2321.28	0	1.437e-10				High	42.13	0.00242491	High	86.32	8.97215e-08	High	63.13	2.02345e-05	High	50.47	0.00038051	1
	VGTPLYNIK	4	1	1	O14460		1004.58	0	0.002089				High	39.06	0.00175694	High	38.85	0.00175928	High	39.2	0.00162306	High	35.73	0.00360856	0
	ESVSEPSSMTALSK	3	1	1	O14460		1452.69	0	6.248e-06				High	38.41	0.00809748	High	22.07	0.35731	High	14.44	1.94265				0
	AFNMFILDPIYR	3	1	1	O14460		1499.77	0	0.002095				High	30.64	0.0412072	High	42.75	0.00332865				High	43.18	0.00233928	0
	GGGQIIPTAR	2	2	2	O14460;O94316		969.548	0	0.008136				High	28.47	0.011023	High	23.79	0.0323819							0
	IQGPNYVPGK	1	1	1	O14460		1072.58	0	0.007074				High	21.59	0.292279										0
	VVESVNVVISTYYDK	4	1	1	O14460		1714.89	0	0.0002433				High	13.8	2.93476	High	13.3	3.45656	High	24.1	0.274277	High	34.16	0.0278188	0
	IMADEFGWDVTDAR	1	1	1	O14460		1625.73	0	1.073e-06							High	67.81	1.01995e-05							0
	EPADGTDFLVNLIDSPGHVDFSSEVTAALR	2	1	1	O14460		3172.54	0	4.657e-08							High	60.67	0.000205132				High	40.1	0.0229993	0
	ALLELQISQEELYQNFAR	1	1	1	O14460	Q6(Deamidated)	2166.12	0	1.464e-05							High	58.27	0.000139628							0
	IFMTAEPMSEELSVAIETGHVNPR	1	1	1	O14460	M8(Oxidation)	2674.28	0	0.0002191							High	46.32	0.00477309							0
	IMADEFGWDVTDAR	1	1	1	O14460	M2(Oxidation)	1641.72	0	0.0003074							High	40.58	0.0056349							0
	STAISLFAEMTDDDMKDMK	1	1	1	O14460		2148.95	0	8.062e-06							High	33.86	0.0469327							1
	DMKEPADGTDFLVNLIDSPGHVDFSSEVTAALR	1	1	1	O14460		3546.71	0	0.0007785							High	32.88	0.142873							1
	STLTDSLVQK	1	1	1	O14460		1091.6	0	0.001591							High	31.29	0.0213246							0
	RVVYASTLLASPIIQEPVFLVEIQVSENAMGGIYSVLNK	2	1	1	O14460		4248.29	0	0.001956							High	27.66	0.0873261				High	21.86	0.307243	1
	LEVTIKPDEK	1	1	1	O14460		1171.66	0	0.0004797							High	21.93	0.191722							0
	TVLMMGSR	1	1	1	O14460		894.454	0.001	0.0212				High	19.29	0.183118										0
	AVAYLNEIK	2	1	1	O14460		1020.57	0.001	0.01698				High	15.99	0.39024	High	10.65	1.27427							0
	ENVPDYTEYYDRL	1	1	1	O14460		1676.75	0.001	0.006439							High	48.01	0.00111241							1
	LEVTIKPDEKELEGK	1	1	1	O14460		1727.94	0.001	0.01083							High	35.53	0.0144707							1
	ISPPVVSYR	1	1	1	O14460		1017.57	0.001	0.006836							High	31.65	0.0192179							0
	FYAFGR	4	1	1	O14460		760.378	0.002	0.03075				High	31.35	0.0194199	High	27.95	0.0106616	High	21.76	0.0443427	High	23.09	0.0326454	0
	AETLYEGPMDDECAVGIRNCDANAPLMIYVSK	1	1	1	O14460		3488.57	0.005	0.07664				High	20.51	2.8699										1
O13370	ATP-dependent RNA helicase ded1 OS=Schizosaccharomyces pombe (strain 972 / ATCC 24843) GN=ded1 PE=1 SV=1 - [DED1_SCHPO]	67.77	1	35	36	210	110.395	21.54	9	9	1050.57	59.75	30	52	1063.26	62.11	31	52	815.557	60.53	28	45	790.954	55.82	26	52	636	69.7158	8.49951
	Sequence	# PSMs	# Proteins	# Protein Groups	Protein Group Accessions	Modifications	MH+ [Da]	q-Value	PEP	A2	IonScore A2	Exp Value A2	B2	IonScore B2	Exp Value B2	C2	IonScore C2	Exp Value C2	D2	IonScore D2	Exp Value D2	E2	IonScore E2	Exp Value E2	# Missed Cleavages
	AYPTTLILAPTR	6	1	1	O13370		1316.76	0	7.583e-05	High	47.35	0.000406811	High	49.67	0.000234131	High	39.94	0.00220019	High	33.46	0.00996305	High	50.18	0.00020819	0
	FLVLDEADR	5	1	1	O13370		1077.56	0	0.002344	High	36.52	0.00558223	High	44.33	0.000924289	High	60.72	2.14772e-05	High	42.78	0.00132071	High	44.78	0.000868241	0
	GLDIPNVTHVINYDLPTDIDDYVHR	9	1	1	O13370		2894.42	0	2.431e-07	High	31.91	0.125227	High	63.41	8.97937e-05	High	53.2	0.000916816	High	24.9	0.633435	High	37.9	0.0317713	0
	HIVEGADMTSVEER	8	1	1	O13370		1572.73	0	2.125e-09	High	29.02	0.0863414	High	63.71	2.87066e-05	High	63.62	2.93077e-05	High	66.15	1.57366e-05	High	45.3	0.00199059	0
	DKPSAGAAPAVGDDESVSSR	7	1	1	O13370		1915.9	0	1.465e-07	High	25.83	0.261086	High	55.69	0.000277058	High	33.13	0.0491514	High	26.68	0.219401	High	53	0.000505949	0
	GPAAVPVDQDAGMGYRPR	5	1	1	O13370		1856.91	0	5.1e-05	High	22.02	0.597912	High	35.21	0.0288495	High	36.67	0.0206021	High	25.76	0.244356	High	21.68	0.649998	0
	AGNTGQAVAFFNR	6	1	1	O13370		1352.67	0	2.257e-05	High	20.54	0.459643	High	57.59	8.43905e-05	High	37.23	0.00910217	High	44.28	0.00196889	High	28.57	0.0673432	0
	TSIMVATAVASR	5	1	1	O13370		1206.65	0	1.2e-05	High	18.83	0.329259	High	60.68	2.82172e-05	High	57.29	6.14039e-05	High	43.99	0.00131279	High	60.69	2.81523e-05	0
	SQTPSEFSSNYGGR	9	1	1	O13370		1516.67	0	9.199e-05	High	17.09	0.982056	High	44.04	0.00178886	High	46.12	0.00110565	High	33.03	0.0217013	High	36.36	0.0105546	0
	MADTLTDYLLNSNFPATSIHGDR	8	1	1	O13370		2552.21	0	4.28e-21				High	106.6	3.91062e-09	High	60.82	0.000146753	High	147.72	3.00476e-13	High	24.28	0.666252	0
	RPTNSSSGYSSGPSYSGYGGFESR	4	1	1	O13370		2487.08	0	2.459e-09				High	84.73	5.34044e-07	High	60.36	0.000146075	High	58.11	0.000246545	High	41.78	0.0105834	0
	EGGYSNGGGYR	9	1	1	O13370	N6(Deamidated)	1117.45	0	2.562e-05				High	60.71	1.27377e-05	High	50.65	0.000129149	High	51.56	0.000104735	High	23.41	0.0684055	0
	QLFGAVADGTK	4	1	1	O13370		1106.58	0	7.716e-05				High	57.77	4.38661e-05	High	51.93	0.000167035	High	57.68	4.47847e-05				0
	TAGFLFPILSLAFDK	16	1	1	O13370		1639.91	0	2.139e-08				High	52.44	0.000178176	High	47.91	0.00053073	High	58.12	5.07219e-05	High	49.24	0.000371668	0
	RPTNSSSGYSSGPSYSGYGGFESR	7	1	1	O13370	N4(Deamidated)	2488.07	0	6.855e-08				High	51.34	0.00108157	High	35.3	0.0415383	High	32.62	0.0801105	High	88.59	2.01032e-07	0
	TAGFLFPILSLAFDKGPAAVPVDQDAGMGYRPR	4	1	1	O13370		3477.81	0	5.294e-08				High	47.97	0.00196692	High	74.88	3.65886e-06	High	52.11	0.00074621	High	56.29	0.000292529	1
	TPHHGNTYNSGSAQSWW	2	1	1	O13370		1929.83	0	0.001596				High	47.47	0.00133042				High	41.75	0.00495243				0
	KAYPTTLILAPTR	5	1	1	O13370		1444.85	0	0.001072				High	43.34	0.000468081	High	24.15	0.0388438	High	35.48	0.00291633	High	60.67	8.65608e-06	1
	MLDMGFEPQIR	4	2	2	P24782;O13370		1336.64	0	0.0001				High	42.01	0.00206163	High	56.51	8.1302e-05	High	57.32	6.07032e-05	High	42.22	0.00196432	0
	TSIMVATAVASR	5	1	1	O13370	M4(Oxidation)	1222.65	0	0.0005063				High	37.15	0.00711257	High	37.31	0.00667881	High	32.44	0.0206114	High	20.39	0.428719	0
	DFLKDYVFLSVGR	6	1	1	O13370		1558.83	0	0.0003713				High	35.95	0.0158049	High	40.77	0.00490792				High	36.71	0.0132569	1
	SYLLDILHTLPPEGLTLIFVETK	6	1	1	O13370		2612.46	0	5.491e-09				High	35.59	0.00749497	High	57.03	5.62754e-05	High	20.57	0.27187	High	62	1.79507e-05	0
	QTLMFSATFPR	4	1	1	O13370		1298.66	0	7.07e-05				High	34.67	0.01317	High	48.34	0.000582555	High	49.3	0.000434125	High	64.38	1.4499e-05	0
	QTLMFSATFPR	4	1	1	O13370	M4(Oxidation)	1314.65	0	3.094e-05				High	34.04	0.0204132	High	32.86	0.0264497	High	41.16	0.00389689	High	23.08	0.255615	0
	YDDIPVEVSGGDIEPVNEFTSPPLNSHLLQNIK	4	1	1	O13370		3636.8	0	3.041e-05				High	29.54	0.240078	High	13.8	8.80011	High	16.74	4.53965	High	21.69	1.43457	0
	LSGYTQPTPVQK	4	1	1	O13370		1318.7	0	0.0002724				High	28.68	0.0469573	High	30.85	0.028614	High	26.62	0.0775265	High	14.85	1.12278	0
	NSIPIVTSGR	4	1	1	O13370		1043.58	0	0.001967				High	23.62	0.150992	High	22.6	0.190965	High	38.43	0.00498833	High	35.68	0.00939626	0
	DYVFLSVGR	4	1	1	O13370		1055.55	0	0.004804				High	23.12	0.0962869	High	32.05	0.0123188	High	35	0.00515451	High	25.18	0.0599194	0
	RMADTLTDYLLNSNFPATSIHGDR	1	1	1	O13370		2708.31	0	0.003764				High	16.6	4.13924										1
	MADTLTDYLLNSNFPATSIHGDR	3	1	1	O13370	M1(Oxidation)	2568.21	0	5.133e-05				High	14.91	5.92913	High	24.16	0.707364				High	17.57	3.20659	0
	SQTPSEFSSNYGGR	3	1	1	O13370	N10(Deamidated)	1517.65	0	0.0001345				High	14.83	1.27101	High	44.32	0.00146637	High	20.64	0.340877				0
	VSTGINFEK	1	1	1	O13370		994.52	0	0.0009665							High	56.71	4.27676e-05							0
	GLDIPNVTHVINYDLPTDIDDYVHR	1	1	1	O13370	N6(Deamidated)	2895.43	0	0.0001465							High	43.97	0.00753028							0
	SYLLDILHTLPPEGLTLIFVETKR	1	1	1	O13370		2768.56	0	0.0006618							High	37.43	0.00410229							1
	VGSTSENITQK	1	1	1	O13370		1163.59	0	0.0007688							High	36.77	0.00699506							0
	SDNVQQQVDSVGSVTEK	6	1	1	O13370	N-Term(Acetyl)	1861.88	0	1.884e-11							High	36.07	0.02295	High	48.18	0.00145973	High	30.82	0.0796894	0
	QLFGAVADGTK	1	1	1	O13370	Q1(Deamidated)	1107.56	0	0.00248										High	24.63	0.104338				0
	TAGFLFPILSLAFDKGPAAVPVDQDAGMGYRPR	1	1	1	O13370	Q24(Deamidated)	3478.8	0	2.563e-07													High	69.77	1.28372e-05	1
	TAGFLFPILSLAFDKGPAAVPVDQDAGMGYRPR	1	1	1	O13370	M28(Oxidation)	3493.8	0	0.003085													High	25.88	0.342408	1
	LVDLIDR	4	1	1	O13370		843.494	0.001	0.02379				High	49.11	0.000224008	High	35.13	0.00560097	High	30.86	0.0149714	High	34.3	0.00678052	0
	GPAAVPVDQDAGMGYRPR	3	1	1	O13370	M13(Oxidation)	1872.9	0.001	0.01379				High	33.42	0.0477055				High	18.46	1.47265	High	21.56	0.703818	0
	MLDMGFEPQIR	6	2	2	P24782;O13370	M1(Oxidation)	1352.63	0.001	0.01318				High	32.46	0.0227018	High	24.34	0.138048	High	31.89	0.0256592	High	12	2.34401	0
	ISLANIK	4	1	1	O13370		758.477	0.001	0.02562				High	28.77	0.0315256	High	32.42	0.0136039	High	33	0.0119032	High	34.73	0.00799215	0
	AGNTGQAVAFFNR	2	1	1	O13370	N12(Deamidated)	1353.66	0.001	0.004422				High	11.82	3.57437	High	22.22	0.329585							0
	NSIPIVTSGR	3	1	1	O13370	N1(Deamidated)	1044.57	0.003	0.02566				High	16.12	0.745246				High	18.96	0.387525	High	17.19	0.582505	0
	DIQLLAR	1	1	1	O13370		828.494	0.004	0.05967				High	31.26	0.0105866										0
	GFGQWR	1	1	1	O13370		750.368	0.004	0.03053										High	28.52	0.0119514				0
	ALELFR	1	1	1	O13370		748.435	0.006	0.08387				High	20.45	0.129826										0
	KYIPPFAR	1	1	1	O13370		991.572	0.008	0.1215							High	18.74	0.183782							1
O59855	Probable heat shock protein ssa2 OS=Schizosaccharomyces pombe (strain 972 / ATCC 24843) GN=ssa2 PE=1 SV=3 - [HSP72_SCHPO]	66.46	1	17	31	258	296.539	25.5	12	16	1375.44	63.21	29	71	1039.76	66.46	31	64	1138.92	63.68	29	55	825.771	60.43	29	52	647	70.1897	5.24951
	Sequence	# PSMs	# Proteins	# Protein Groups	Protein Group Accessions	Modifications	MH+ [Da]	q-Value	PEP	A2	IonScore A2	Exp Value A2	B2	IonScore B2	Exp Value B2	C2	IonScore C2	Exp Value C2	D2	IonScore D2	Exp Value D2	E2	IonScore E2	Exp Value E2	# Missed Cleavages
	TTPSYVAFTDTER	5	2	2	Q10265;O59855		1487.7	0	0.003651	High	71.96	3.1394e-06	High	57.01	9.85383e-05	High	57.17	9.49741e-05	High	57.14	9.56324e-05	High	43.54	0.00219966	0
	DAGLIAGLNVLR	8	2	2	Q10265;O59855		1211.71	0	3.485e-05	High	51.22	8.30601e-05	High	55.49	3.20624e-05	High	51.25	8.5113e-05	High	51.18	8.6496e-05	High	51.46	8.10953e-05	0
	IINEPTAAAIAYGLDR	10	2	2	Q10265;O59855		1687.9	0	7.701e-07	High	49.27	0.00068439	High	82.24	3.19115e-07	High	77.72	8.86636e-07	High	82.15	3.24274e-07	High	59.22	6.60601e-05	0
	ASVNEIVLVGGSTR	11	1	1	O59855		1401.77	0	1.05e-10	High	45.78	0.00101468	High	51.7	0.000259616	High	65.79	1.01235e-05	High	66.58	8.43978e-06	High	64.35	1.41036e-05	0
	VEIIANDQGNR	6	3	3	P36604;Q10265;O59855		1228.63	0	5.992e-05	High	45.49	0.000800853	High	45.97	0.000857432	High	31.16	0.0217047	High	46.21	0.000617475	High	51.04	0.000223127	0
	NQVAMNPHNTIFDAK	7	2	2	Q10265;O59855		1699.82	0	3.934e-08	High	44.71	0.00260479	High	37.04	0.0149953	High	46.86	0.00153414	High	54.63	0.000256369	High	45.04	0.0024142	0
	VTDAVVTVPAYFNDSQR	7	2	2	Q10265;O59855		1881.93	0	8.014e-06	High	35.12	0.0296228	High	43.29	0.00454749	High	20.95	0.777412	High	42.14	0.00601472	High	36.59	0.0212921	0
	NHLESYAYSLR	8	2	2	Q10265;O59855		1352.66	0	0.05385	High	33.09	0.027049	High	31.63	0.0408119	High	30.48	0.0499614	High	30.03	0.0593387	High	30.54	0.0524991	0
	LVNHFIQEFK	9	1	1	O59855		1274.69	0	8.517e-05	High	26.32	0.0954384	High	45.21	0.0012278	High	48.36	0.000617078	High	23.97	0.171571	High	41.33	0.00315097	0
	DGKPVLQVEYK	9	1	1	O59855		1275.7	0	0.0003049	High	25.09	0.0954005	High	34.69	0.0103586	High	43.25	0.00140053	High	31.93	0.0197493	High	42.01	0.00186334	0
	NSLDDPNLK	5	2	2	Q10265;O59855		1015.51	0	0.001115	High	22.58	0.0825356	High	34	0.0059318	High	47.31	0.000277742	High	18.37	0.200126	High	35.87	0.00386938	0
	NQVAMNPHNTIFDAK	7	2	2	Q10265;O59855	M5(Oxidation)	1715.82	0	0.00036	High	17.18	1.54385	High	50.6	0.00070069	High	37.07	0.0158738	High	31.46	0.0550519	High	26.71	0.172457	0
	SINPDEAVAYGAAVQAAVLTGDTSEK	9	1	1	O59855		2577.27	0	1.024e-17	High	13.63	7.02071	High	36.69	0.0356256	High	50.1	0.00160267	High	58.35	0.000237531	High	35.96	0.0411325	0
	SINPDEAVAYGAAVQAAVLTGDTSEK	1	1	1	O59855	N3(Deamidated)	2578.27	0	0.02511	High	12.83	8.55281													0
	TLSSSAQASIEIDSLFEGIDFYTSITR	17	1	1	O59855		2951.45	0	6.874e-10				High	127.69	3.52091e-11	High	88.17	3.23709e-07	High	70.51	1.90156e-05	High	44.34	0.00768101	0
	SNQGESNVLIFDLGGGTFDVSLLTIEEGIFEVK	4	1	1	O59855		3527.78	0	2.054e-10				High	114.33	6.66558e-10	High	87.38	3.41306e-07	High	72.05	1.21566e-05				0
	SEIFSTYSDNQPGVLIQVFEGER	6	1	1	O59855		2615.27	0	4.293e-06				High	54.19	0.000709926	High	51.14	0.00141097	High	52.24	0.00111377	High	48.25	0.00286454	0
	TFTPEEISSMVLMK	9	1	1	O59855		1612.8	0	1.48e-05				High	53.53	0.000281691	High	51.58	0.000459759	High	51.06	0.000490819	High	51.54	0.000447879	0
	FELSGIPPAPR	7	2	2	Q10265;O59855		1183.65	0	7.657e-05				High	52.82	9.11581e-05	High	36.99	0.00339977	High	45.32	0.00051262	High	52.91	8.69859e-05	0
	TQDLLLLDVAPLSMGIETAGGVMTPLIK	4	1	1	O59855	M14(Oxidation)	2912.57	0	2.983e-12				High	49.99	0.000600882	High	44.4	0.00200419	High	62.96	3.02736e-05	High	40.68	0.0051646	0
	ETIEWLDSNTTAAK	5	1	1	O59855		1578.76	0	3.225e-06				High	46.67	0.00125292	High	59.05	7.36753e-05	High	45.49	0.00167939	High	19.58	0.65817	0
	QKELESVANPIMAK	5	1	1	O59855		1557.83	0	8.791e-05				High	45.34	0.00172817	High	63.77	2.48078e-05	High	61.92	3.8015e-05	High	24.92	0.189077	1
	NSLDDPNLKDK	3	2	2	Q10265;O59855		1258.63	0	0.005244				High	45.28	0.00135048	High	23.54	0.136096				High	37.44	0.00821275	1
	TLSSSAQASIEIDSLFEGIDFYTSITR	6	1	1	O59855	Q7(Deamidated)	2952.44	0	0.0003201				High	44.13	0.00824507				High	13.77	8.91148	High	23.05	1.0013	0
	ETAEAYLGGK	4	1	1	O59855		1038.51	0	0.0006728				High	44.1	0.00105626	High	45.75	0.00073303	High	30.42	0.0250105	High	31.94	0.0176247	0
	LVSDFFNGK	4	2	2	Q10265;O59855	N7(Deamidated)	1027.51	0	0.000885				High	42.14	0.000971398	High	45.96	0.000403085	High	34.51	0.00559316	High	43.08	0.000782343	0
	SNQGESNVLIFDLGGGTFDVSLLTIEEGIFEVK	4	1	1	O59855	Q3(Deamidated)	3528.79	0	8.258e-07				High	41.41	0.0123268	High	37.57	0.030911							0
	TQDLLLLDVAPLSMGIETAGGVMTPLIK	11	1	1	O59855		2896.58	0	3.574e-10				High	39.63	0.0051942	High	19.22	0.57264	High	61.58	3.23186e-05	High	101.84	3.04406e-09	0
	ELESVANPIMAK	3	1	1	O59855	M10(Oxidation)	1317.67	0	0.001854				High	39.14	0.00597914	High	12.95	2.5603	High	42.91	0.0025098				0
	VTDAVVTVPAYFNDSQR	2	2	2	Q10265;O59855	N13(Deamidated)	1882.92	0	0.0002095				High	38.78	0.012568				High	60.52	8.50339e-05				0
	MRETAEAYLGGK	7	1	1	O59855		1325.65	0	0.001808				High	35.7	0.0136865	High	26.67	0.117542	High	30.9	0.0447057	High	18.08	0.849557	1
	ELESVANPIMAK	4	1	1	O59855		1301.68	0	0.0007539				High	35.64	0.0140133	High	49.26	0.000597627	High	49.45	0.000572045	High	39.55	0.00569561	0
	VEIIANDQGNR	5	3	3	P36604;Q10265;O59855	N6(Deamidated)	1229.61	0	0.003923				High	27.79	0.061879	High	23.53	0.154819	High	30.58	0.0325494	High	41.11	0.00226143	0
	GVPQIEVTFDVDANGILNVSALEK	1	2	2	Q10265;O59855	N18(Deamidated)	2529.32	0	0.0002556				High	27.78	0.16364										0
	ETIEWLDSNTTAAKDEFEAK	4	1	1	O59855		2298.08	0	1.536e-10				High	27.65	0.23836	High	28.9	0.186732	High	63.73	6.13647e-05				1
	LVNHFIQEFK	2	1	1	O59855	N3(Deamidated)	1275.67	0	0.001127				High	27.49	0.0725428							High	11.49	2.89153	0
	ATAGDTHLGGEDFDSR	5	2	2	Q10265;O59855		1648.72	0	0.001669				High	26.04	0.160531	High	24.78	0.215896				High	32.64	0.035311	0
	FDDPEVQSDMK	3	1	1	O59855		1310.56	0	0.0003086				High	24.98	0.0872052	High	39.5	0.00307994				High	26.73	0.0581769	0
	GVPQIEVTFDVDANGILNVSALEK	5	2	2	Q10265;O59855		2528.33	0	4.318e-08				High	18.6	1.19955	High	19	1.04994	High	27.87	0.143872	High	20.24	0.834581	0
	FDDPEVQSDMK	2	1	1	O59855	M10(Oxidation)	1326.55	0	0.00069				High	18.47	0.347759				High	14.9	0.883411				0
	TQDLLLLDVAPLSMGIETAGGVMTPLIK	4	1	1	O59855	Q2(Deamidated)	2897.58	0	2.319e-05				High	18.41	0.750621	High	10.7	4.4472	High	18.38	0.740577	High	17.79	0.869133	0
	NQVAMNPHNTIFDAK	8	2	2	Q10265;O59855	Q2(Deamidated)	1700.81	0	0.005667				High	18.39	1.10179	High	16.02	1.90151				High	14.36	2.78309	0
	SIGIDLGTTYSCVGHFSNNR	3	2	2	Q10265;O59855	S1(Phospho)	2220.96	0	5.415e-05							High	55.2	0.000353032	High	18.39	1.67188	High	39.26	0.0136126	0
	TQDLLLLDVAPLSMGIETAGGVMTPLIK	1	1	1	O59855	Q2(Deamidated); M14(Oxidation)	2913.57	0	0.003205							High	23.32	0.283076							0
	KFDDPEVQSDMK	3	1	1	O59855		1438.65	0	0.002095							High	13.46	2.05122	High	30.67	0.0415235	High	15.42	1.31769	1
	ETIEWLDSNTTAAK	1	1	1	O59855	N9(Deamidated)	1579.75	0.001	0.01652				High	17.07	1.22612										0
	NHLESYAYSLR	1	2	2	Q10265;O59855	N1(Deamidated)	1353.64	0.002	0.03743				High	17.83	0.95099										0
	MRETAEAYLGGK	1	1	1	O59855	M1(Oxidation)	1341.65	0.003	0.03567							High	25.18	0.135918							1
	KFDDPEVQSDMK	2	1	1	O59855	M11(Oxidation)	1454.65	0.007	0.09494							High	17.24	0.875084							1
O74874	Glucose-repressible alcohol dehydrogenase transcriptional effector OS=Schizosaccharomyces pombe (strain 972 / ATCC 24843) GN=ccr4 PE=3 SV=1 - [CCR4_SCHPO]	59.86	1	27	27	176					994.115	45.07	21	37	1025.88	48.55	22	43	952.798	45.94	20	41	1138.87	56.81	25	55	690	76.4082	6.94678
	Sequence	# PSMs	# Proteins	# Protein Groups	Protein Group Accessions	Modifications	MH+ [Da]	q-Value	PEP	A2	IonScore A2	Exp Value A2	B2	IonScore B2	Exp Value B2	C2	IonScore C2	Exp Value C2	D2	IonScore D2	Exp Value D2	E2	IonScore E2	Exp Value E2	# Missed Cleavages
	LVSDDDDDVNDNVSTSVR	4	1	1	O74874		1964.87	0	1.238e-11				High	136.05	2.38505e-12	High	87	1.91346e-07	High	41.51	0.00676299	High	60.31	8.69189e-05	0
	NQIMESGTAGLIAALR	8	1	1	O74874		1644.88	0	8.242e-08				High	90.71	4.87005e-08	High	73.41	2.78183e-06	High	61.14	4.59555e-05	High	71.14	4.2033e-06	0
	MVIEYNQAPSLR	5	1	1	O74874		1420.73	0	4.817e-07				High	82.54	2.66335e-07	High	62.34	2.7101e-05	High	66.36	1.10517e-05	High	53.8	0.000210102	0
	SAYGESEALSFTNYTPGFK	4	1	1	O74874		2068.95	0	2.744e-07				High	67.29	2.14634e-05	High	16.6	2.64829				High	71.78	7.77243e-06	0
	EVLLFDNMISVIPAELGTLFQLK	8	1	1	O74874		2590.42	0	4.464e-17				High	65.53	1.23715e-05	High	63.42	2.052e-05	High	81.81	2.94321e-07	High	59.85	4.56498e-05	0
	TIPPELGLLTELR	12	1	1	O74874		1451.85	0	4.535e-06				High	64.29	3.53772e-06	High	65.03	2.98348e-06	High	59.44	1.08075e-05	High	57.68	1.64637e-05	0
	NLVILDASGNSIK	5	1	1	O74874		1343.75	0	1.266e-05				High	60.96	2.4371e-05	High	46.37	0.000701251	High	48.91	0.000390727	High	59.99	3.04701e-05	0
	VIQVAMLMDEIAQVATK	8	1	1	O74874		1860	0	4.895e-17				High	57.1	0.000116016	High	42.91	0.00317754	High	65.7	1.60281e-05	High	61.51	4.1814e-05	0
	ILGIEGNPLQDVYK	4	1	1	O74874		1558.85	0	1.618e-06				High	56.31	0.000115422	High	69.45	5.3913e-06	High	52.51	0.000276316	High	62.21	3.06899e-05	0
	SGGPGFSMNYNAR	4	1	1	O74874		1357.6	0	3.791e-10				High	50.33	0.000334122	High	57.64	6.19012e-05	High	64.55	1.22763e-05	High	48.73	0.000481614	0
	FSFLTELYINHNNLTR	8	1	1	O74874		1982.01	0	4.755e-05				High	48.07	0.00141919	High	48.12	0.00140295	High	47.29	0.00178053	High	72.89	4.6521e-06	0
	GAIDHIWYTGNSLEVTGLLK	7	1	1	O74874		2187.14	0	3.841e-13				High	45.47	0.00253994	High	51.69	0.000636644	High	53.25	0.000459666	High	48.49	0.00131669	0
	DLTAADSNKPSTTSK	7	1	1	O74874		1535.75	0	2.829e-10				High	40.28	0.00540973	High	57.16	0.000113078	High	60.02	5.74349e-05	High	18.05	0.853096	0
	LVSDDDDDVNDNVSTSVR	4	1	1	O74874	N10(Deamidated)	1965.85	0	0.0001118				High	40.15	0.00853989	High	33.15	0.0427766	High	12.3	5.29076				0
	SGGPGFSMNYNAR	4	1	1	O74874	N9(Deamidated)	1358.58	0	0.002702				High	36.83	0.0060795	High	34.19	0.0116035	High	25.01	0.0933881	High	39.44	0.00309435	0
	TGAFTGGPNAAGLSSLGGK	5	1	1	O74874		1662.84	0	1.917e-05				High	36.26	0.0150236	High	51.89	0.000429056	High	45.62	0.00177243	High	28	0.106188	0
	NLVILDASGNSIK	5	1	1	O74874	N10(Deamidated)	1344.74	0	0.0003116				High	35.52	0.0109973	High	51.67	0.000235206	High	46.28	0.000923179	High	36.2	0.00828797	0
	LTSNMYNR	4	1	1	O74874		998.472	0	0.002392				High	35.07	0.00784153	High	45.43	0.000727501	High	37.67	0.00430924	High	48.7	0.000339939	0
	LVSDDDDDVNDNVSTSVR	4	1	1	O74874	S3(Phospho)	2044.83	0	2.486e-07				High	34.39	0.0257652	High	40.53	0.00616926	High	25.04	0.217607	High	83.57	3.05262e-07	0
	QQIALATQSR	4	1	1	O74874		1115.62	0	0.003018				High	31.85	0.0231535	High	46	0.000855297	High	27.79	0.0595502	High	41.88	0.00223455	0
	DNISVITLLENK	4	1	1	O74874		1358.75	0	5.707e-05				High	30.84	0.0349435	High	25.61	0.0957641	High	35.88	0.00905082	High	25.17	0.105975	0
	YATSTLYGYTPSWALSWSYR	8	1	1	O74874		2373.12	0	5.055e-05				High	28.4	0.226934	High	56.63	0.000340571	High	33.82	0.0660814	High	36.13	0.0385784	0
	SAYGESEALSFTNYTPGFK	1	1	1	O74874	N13(Deamidated)	2069.95	0	0.0003876				High	20.3	1.12504										0
	EVLLFDNMISVIPAELGTLFQLK	1	1	1	O74874	M8(Oxidation)	2606.42	0	0.0002694				High	18.63	0.694352										0
	FSFLTELYINHNNLTR	11	1	1	O74874	N12(Deamidated)	1983	0	9.129e-05				High	12.55	5.63965	High	18.88	1.28643	High	23.47	0.43831	High	49.09	0.00117515	0
	SGGPGFSMNYNAR	2	1	1	O74874	M8(Oxidation)	1373.59	0	0.002827				High	10.34	3.09312							High	17.54	0.559427	0
	GAIDHIWYTGNSLEVTGLLK	3	1	1	O74874	N11(Deamidated)	2188.13	0	1.929e-07							High	58.58	0.000147135	High	43.44	0.00482336	High	39.55	0.0118127	0
	VIQVAMLMDEIAQVATK	2	1	1	O74874	M6(Oxidation)	1875.99	0	0.001964							High	29.26	0.0841896				High	22.5	0.383517	0
	YNTSSTTTTLTTSTTLNTSSGTTLNSTSK	2	1	1	O74874		2971.42	0	0.0002743							High	20.07	2.25289				High	16.88	4.64998	0
	NQIMESGTAGLIAALR	4	1	1	O74874	M4(Oxidation)	1660.87	0	3.894e-05							High	17.68	0.990381	High	49.43	0.000672747	High	34.34	0.02056	0
	MVIEYNQAPSLR	1	1	1	O74874	M1(Oxidation)	1436.72	0	6.912e-08										High	66.8	1.18463e-05				0
	YTQGTIYPGAHPGLLTPDHQHAAILSVQNSPALENSNISEHWK	4	1	1	O74874	T2(Phospho)	4772.3	0	0.002083										High	17.11	6.42261	High	34.46	0.124259	0
	TGAFTGGPNAAGLSSLGGK	2	1	1	O74874	N9(Deamidated)	1663.83	0	4.355e-05													High	55.31	0.00019919	0
	TTTSSVAVDDQK	1	1	1	O74874		1251.61	0	0.003678													High	12.33	1.88302	0
	LPPEIGK	6	1	1	O74874		753.451	0.001	0.02196				High	29.46	0.0019817	High	27.22	0.00331924	High	21.91	0.011273	High	28.15	0.0026794	0
	IPSDQLKDERPTYPEYLK	2	1	1	O74874		2192.12	0.001	0.02602				High	23.72	0.442666							High	17.9	1.70128	1
	DNISVITLLENKENGSR	1	1	1	O74874	N14(Deamidated)	1902.98	0.001	0.01947													High	29.35	0.0929159	1
	NVSTDLFK	3	1	1	O74874		923.483	0.002	0.02583				High	22.76	0.0768012	High	28.86	0.0188525	High	12.72	0.855303				0
	DWTCLDLGGIGLR	1	1	1	O74874	T3(Phospho)	1498.67	0.002	0.02588							High	30.71	0.0396992							0
	YTQGTIYPGAHPGLLTPDHQHAAILSVQNSPALENSNISEHWK	1	1	1	O74874		4692.32	0.003	0.06602													High	11.97	15.9627	0
	LTSNMYNR	1	1	1	O74874	M5(Oxidation)	1014.47	0.005	0.08724													High	15.9	0.461386	0
	IPSDQLK	1	1	1	O74874		800.452	0.007	0.129													High	12.83	0.669735	0
Q10284	Heat shock protein sks2 OS=Schizosaccharomyces pombe (strain 972 / ATCC 24843) GN=sks2 PE=1 SV=2 - [HSP75_SCHPO]	61.83	1	28	28	173	348.104	27.08	12	14	907.125	59.05	24	46	1000.39	54.49	25	41	746.87	52.53	20	34	790.039	55.3	24	38	613	67.1639	6.0874
	Sequence	# PSMs	# Proteins	# Protein Groups	Protein Group Accessions	Modifications	MH+ [Da]	q-Value	PEP	A2	IonScore A2	Exp Value A2	B2	IonScore B2	Exp Value B2	C2	IonScore C2	Exp Value C2	D2	IonScore D2	Exp Value D2	E2	IonScore E2	Exp Value E2	# Missed Cleavages
	IINEPTAAAIAYGLDAK	10	1	1	Q10284		1730.93	0	8.254e-05	High	90.1	5.32594e-08	High	70.65	4.21456e-06	High	60.22	5.12851e-05	High	67.31	9.99499e-06	High	77.35	1.00414e-06	0
	TTPSFVAFTETER	5	1	1	Q10284		1485.72	0	4.785e-07	High	72.04	3.21964e-06	High	72.08	3.1034e-06	High	76.29	1.17012e-06	High	76.1	1.21631e-06	High	72.02	3.14029e-06	0
	SINPDEAVAYGAAVQAAVLTNK	9	1	1	Q10284		2202.14	0	5.305e-17	High	51.9	0.00062919	High	58.32	0.000140385	High	51.53	0.000670379	High	72.06	5.96786e-06	High	71.58	6.86337e-06	0
	DAGAIAGLNVLR	6	1	1	Q10284		1169.66	0	0.006678	High	50.73	0.000134399	High	33.54	0.00703716	High	46.04	0.000360884	High	43.15	0.000767413	High	39.54	0.00176765	0
	QFTAQEISAMVLTK	9	1	1	Q10284		1566.82	0	1.624e-07	High	48.55	0.000766606	High	59.54	6.14788e-05	High	84.2	2.15567e-07	High	71.49	3.89913e-06	High	58.91	7.10764e-05	0
	NVLIFDLGGGTFDVSLLK	12	1	1	Q10284		1908.05	0	8.713e-08	High	45.19	0.00122287	High	54.92	0.000124977	High	75.76	1.06184e-06	High	40.57	0.00330629	High	62.07	2.67595e-05	0
	LVSDFFDGR	9	1	1	Q10284		1055.52	0	0.0002298	High	28.69	0.0348159	High	60.01	2.49924e-05	High	47.02	0.000497517	High	44.43	0.000906855	High	47.96	0.000402289	0
	KQFTAQEISAMVLTK	7	1	1	Q10284		1694.91	0	4.073e-06	High	28.41	0.0587662	High	41.37	0.00311478	High	47.56	0.000714706	High	56.56	9.26258e-05	High	39.28	0.00493964	1
	SQLESYISNIETTISEPNVMMK	9	1	1	Q10284		2514.21	0	8.562e-06	High	26.88	0.367466	High	43.39	0.00810682	High	48.53	0.00252577	High	31.26	0.133698	High	39.34	0.0209135	0
	IQEMIENADK	5	1	1	Q10284		1190.57	0	0.000334	High	26.1	0.0854239	High	35.04	0.0100735	High	43.54	0.00142292	High	36.6	0.00702271	High	45.72	0.000861353	0
	ADVHDIVLVGGSTR	9	1	1	Q10284		1438.77	0	1.036e-05	High	18.95	0.438722	High	37.12	0.00612349	High	45.08	0.000979489	High	44.72	0.00116195	High	52.13	0.000193197	0
	AVITVPAYFSDSQR	5	1	1	Q10284		1553.8	0	5.831e-05	High	16.5	1.15182	High	57.61	9.00711e-05	High	59.14	6.32656e-05	High	46.97	0.00100254	High	64.93	1.61165e-05	0
	SAHIEITNSVGHLSSTK	5	1	1	Q10284		1780.92	0	2.396e-09				High	59.55	8.10807e-05	High	62.96	3.69758e-05	High	55.72	0.000195847	High	63.78	3.06138e-05	0
	IQGGVFEVLATAGDTHLGGEDFDNALVEHFIQEFKR	3	1	1	Q10284	N24(Deamidated)	3960.96	0	5.062e-06				High	58.76	0.000315118										1
	SAHIEITNSVGHLSSTK	1	1	1	Q10284	N8(Deamidated)	1781.9	0	6.398e-10				High	57.3	0.000141426										0
	GQAELEATFELDANGILK	5	1	1	Q10284		1918.98	0	0.0003414				High	50.49	0.000791915	High	48.67	0.00116068	High	34.55	0.0308486	High	33.58	0.039709	0
	IQGGVFEVLATAGDTHLGGEDFDNALVEHFIQEFK	5	1	1	Q10284		3803.85	0	9.186e-18				High	47.32	0.00500361	High	50.32	0.00246966	High	55.08	0.00085484	High	20.78	2.30877	0
	IQEMIENADK	4	1	1	Q10284	M4(Oxidation)	1206.57	0	0.0002397				High	43.75	0.00107111	High	28.07	0.0396126	High	19.43	0.329532	High	14.71	0.858685	0
	TFTTVADNQTTVTFPVYQGER	9	1	1	Q10284		2375.15	0	1.261e-09				High	41.15	0.011568	High	43.29	0.00700407	High	69.96	1.53104e-05	High	44.9	0.00487817	0
	IQEMIENADKFK	3	1	1	Q10284		1465.74	0	0.002556				High	38.58	0.00827893	High	18.78	0.790632				High	39.31	0.00683976	1
	ALSSVTQTTVEVDSLSNGIDFSSSITR	4	1	1	Q10284		2814.4	0	0.0001366				High	32.28	0.105357	High	17.65	3.01751	High	10.64	14.8864	High	17.68	2.94385	0
	IQGGVFEVLATAGDTHLGGEDFDNALVEHFIQEFKR	3	1	1	Q10284		3959.96	0	3.447e-06				High	31.25	0.182037	High	40.39	0.0222769				High	14.41	8.51996	1
	IQGGVFEVLATAGDTHLGGEDFDNALVEHFIQEFK	5	1	1	Q10284	N24(Deamidated)	3804.84	0	0.0004622				High	30.92	0.209151	High	33.49	0.132389	High	29.77	0.276566	High	22.85	1.41477	0
	VIDNNGIPTIEVNYLGEK	4	1	1	Q10284		1988.03	0	0.001023				High	24.89	0.270013	High	24.23	0.308476				High	16.13	1.92343	0
	ALSSVTQTTVEVDSLSNGIDFSSSITR	4	1	1	Q10284	N17(Deamidated)	2815.39	0	4.259e-10							High	86.01	4.71149e-07				High	13.6	7.69577	0
	FEDINATTFK	2	1	1	Q10284		1185.58	0	0.0003311							High	46.43	0.000532373				High	55.16	7.13207e-05	0
	ATIDPVAK	4	1	1	Q10284		814.467	0	3.801e-05							High	41.78	0.00075003	High	39.78	0.00118872	High	40.4	0.00103057	0
	RALSSVTQTTVEVDSLSNGIDFSSSITR	1	1	1	Q10284	Q8(Deamidated)	2971.5	0	0.000117							High	32.93	0.080296							1
	RALSSVTQTTVEVDSLSNGIDFSSSITR	1	1	1	Q10284		2970.51	0	0.001365							High	26.36	0.381144							1
	TFTTVADNQTTVTFPVYQGER	1	1	1	Q10284	N8(Deamidated)	2376.15	0	0.00219										High	31.97	0.0977457				0
	ALSSVTQTTVEVDSLSNGIDFSSSITR	1	1	1	Q10284	Q7(Deamidated); N17(Deamidated)	2816.38	0	0.0003317										High	21.27	1.46603				0
	VIDNNGIPTIEVNYLGEK	3	1	1	Q10284	N13(Deamidated)	1989.02	0	0.0003126										High	12.14	5.14108	High	16.96	1.85565	0
	SKIEAQLAECMSQLELEDTNTDALR	2	1	1	Q10284	K2(Methyl); Q6(Deamidated); M11(Oxidation); Q13(Deamidated)	2840.31	0.001	0.01218				High	16.25	5.40555										1
	ARFEDINATTFK	3	1	1	Q10284		1412.72	0.002	0.02759				High	25.43	0.125021	High	30.07	0.0429521	High	23.03	0.217262				1
	NTPIPTIK	2	1	1	Q10284		883.525	0.002	0.03968				High	15.66	0.104583							High	16.09	0.0947242	0
	IDISDDPR	2	1	1	Q10284		930.451	0.002	0.04025							High	37.73	0.00238647				High	37.29	0.00262226	0
	RYEDPETQKDIK	1	1	1	Q10284		1521.75	0.005	0.06644				High	29.25	0.067091										2
Q10289	Fatty acid synthase subunit alpha OS=Schizosaccharomyces pombe (strain 972 / ATCC 24843) GN=fas2 PE=1 SV=2 - [FAS2_SCHPO]	53.15	1	67	67	215	76.73	4.61	5	5	809.511	34.15	43	48	972.716	43.49	51	61	829.587	32.84	42	49	799.211	39.69	48	52	1842	202.043	6.17627
	Sequence	# PSMs	# Proteins	# Protein Groups	Protein Group Accessions	Modifications	MH+ [Da]	q-Value	PEP	A2	IonScore A2	Exp Value A2	B2	IonScore B2	Exp Value B2	C2	IonScore C2	Exp Value C2	D2	IonScore D2	Exp Value D2	E2	IonScore E2	Exp Value E2	# Missed Cleavages
	LAIEMGVPIHGIVGYVSTAMDK	6	1	1	Q10289		2301.2	0	4.089e-09	High	45.31	0.00285462	High	48.76	0.00128256	High	68.04	1.56644e-05	High	48.94	0.00127325	High	46.1	0.00225833	0
	YALVTGAGAGSIGAQIVEGLLAGGAK	8	1	1	Q10289		2344.29	0	7.274e-09	High	33.61	0.0204037	High	56.86	8.66495e-05	High	27.6	0.0787224	High	38.31	0.00613894	High	48.9	0.000495332	0
	VPVVTGFSEVGPWGNSR	8	1	1	Q10289		1787.91	0	3.256e-07	High	22.47	0.466298	High	20.84	0.662195	High	68.34	1.15705e-05	High	26.62	0.17095	High	57.31	0.000147324	0
	VYDSDWNWAR	4	1	1	Q10289		1311.58	0	0.002402	High	18.5	0.482382	High	29.98	0.0347095	High	21.47	0.246647				High	31.52	0.0243471	0
	GNAVYGVFQK	3	1	1	Q10289		1082.56	0	0.003808	High	16.04	0.638392	High	22.44	0.146247				High	14.05	1.00552				0
	NNTMLVTQQLELFAR	2	1	1	Q10289		1777.93	0	1.153e-07				High	88.17	1.09503e-07							High	54.72	0.000242341	0
	DILQESFINTANAWINMLLLSASGPIK	4	1	1	Q10289		2959.56	0	3.587e-09				High	87.52	1.69665e-07	High	89.53	1.09591e-07	High	86.23	2.32633e-07	High	74.11	3.73013e-06	0
	EALNTFGNEFWK	4	1	1	Q10289		1455.69	0	6.04e-05				High	69.67	5.42171e-06	High	74.23	1.93506e-06	High	39.41	0.00599103	High	33.82	0.0212249	0
	GALAVWGLTIDDLGVASFHGTSTK	4	1	1	Q10289		2416.25	0	2.825e-15				High	52.62	0.00056835	High	49.97	0.00109806	High	70.6	9.3977e-06	High	26.25	0.262274	0
	LESVLLLALTMEPASR	4	1	1	Q10289		1742.97	0	2.406e-06				High	50.18	0.000380882	High	61.01	3.13831e-05	High	54.71	0.000133874	High	62.14	2.42544e-05	0
	NADNIDEYLAR	4	1	1	Q10289		1293.61	0	9.905e-05				High	47.98	0.000471294	High	37.82	0.00569927	High	41.75	0.0022189	High	41.96	0.00219694	0
	LKPYEALSHLSDLR	3	1	1	Q10289		1641.9	0	0.0003547				High	46.5	0.00099735				High	45.76	0.00114015				0
	NVNHPTAPSTTIDER	4	1	1	Q10289		1651.8	0	0.0006741				High	45.59	0.00206629	High	40.44	0.00641591	High	35.94	0.0180825	High	36.54	0.016459	0
	TDVEALIDYIYDEK	4	1	1	Q10289		1686.81	0	0.0003071				High	44.63	0.00268937	High	23.3	0.364833	High	18.09	1.18447	High	22.33	0.446195	0
	SVPAPGQGILTGAR	4	1	1	Q10289		1323.74	0	8.088e-05				High	43.79	0.000818948	High	23.23	0.0924527	High	27.43	0.0333424	High	34.48	0.00559628	0
	LGLETLFNR	4	1	1	Q10289		1062.59	0	0.0006987				High	42.63	0.00110789	High	48.03	0.000362803	High	60.5	1.75576e-05	High	63.81	8.19344e-06	0
	AVYLNPLAR	4	1	1	Q10289		1016.59	0	6.403e-05				High	40.57	0.00208726	High	33.25	0.0112847	High	45.03	0.000832235	High	36.94	0.0048249	0
	AWLDSVAQK	2	1	1	Q10289		1017.54	0	0.005357				High	39.95	0.00390975							High	33.49	0.0174384	0
	YTHDALVYNNLVR	4	1	1	Q10289		1577.81	0	0.0001931				High	39.7	0.00668628	High	35.9	0.0162578	High	33.46	0.0265531	High	32.08	0.0384983	0
	MFFDIIFGR	3	1	1	Q10289	M1(Oxidation)	1161.58	0	0.001556				High	37.74	0.00480403	High	29.07	0.0353676				High	27.41	0.051833	0
	TFSQSEMAFNILGLMSQK	6	1	1	Q10289		2031.98	0	0.0001323				High	37.06	0.0239689	High	28.83	0.16044	High	32.21	0.0729825	High	38.17	0.0180067	0
	YENMDAALSINR	4	1	1	Q10289		1396.65	0	0.0001114				High	36.07	0.0131619	High	29.66	0.0578026	High	46.62	0.00113894	High	38.48	0.00678309	0
	SVSVSISHDDNQSVSVALAHK	5	1	1	Q10289		2180.09	0	3.321e-07				High	35.88	0.0316069	High	31.62	0.0808822	High	30.84	0.0977428	High	12.97	6.05089	0
	MFFDIIFGR	4	1	1	Q10289		1145.58	0	0.0009705				High	35.12	0.00907449	High	36.55	0.00599749	High	42.45	0.00168949	High	42.63	0.001479	0
	VTEFYQSLYTR	4	1	1	Q10289		1406.7	0	0.0004328				High	34.8	0.0158281	High	24.01	0.178339	High	29.99	0.0454044	High	10.78	3.75186	0
	SQIGEWAER	2	1	1	Q10289		1075.52	0	0.006723				High	33.39	0.0107205				High	22.26	0.144413				0
	MRPEVEQELAHTLLLELLAYQFASPVR	4	1	1	Q10289		3153.67	0	3.059e-09				High	32.1	0.0482486	High	43.01	0.00387527	High	37.42	0.0150341	High	63.32	3.94817e-05	0
	ELLQEVVIDHDLEPFEASK	4	1	1	Q10289		2211.12	0	9.833e-08				High	30.74	0.095845	High	59.14	0.000136832	High	26.06	0.281187	High	24.94	0.364553	0
	KLTHYVTEMAK	3	1	1	Q10289		1320.7	0	0.001918				High	29.48	0.0488076				High	34.94	0.0138671	High	19.94	0.439024	1
	GAAAPLKDIEIISSESGAPEVVLHGEAAK	3	1	1	Q10289		2859.51	0	0.001098				High	27.13	0.169921	High	29.68	0.090746				High	11.37	5.44175	1
	GNLNYEEIPRPGVR	3	1	1	Q10289		1613.84	0	0.002848				High	23.67	0.282635	High	11.58	4.57326	High	13.71	2.71319				0
	YGLGPGR	4	1	1	Q10289		719.384	0	0.002117				High	23.54	0.039833	High	23.16	0.0434753	High	36.83	0.00186742	High	22.57	0.0498015	0
	AVAAETAFDHSITNGPDSEAVFQK	2	1	1	Q10289		2505.19	0	3.22e-06				High	23.37	0.82593	High	17.05	3.5691							0
	ALEVLHTLVAQK	5	1	1	Q10289		1321.78	0	0.00232				High	21.6	0.0345915	High	21.34	0.0367257	High	23.51	0.0222828				0
	VETAAAAAPAATPAPAPAQTSAPAAALPDEPPK	3	1	1	Q10289		3021.55	0	2.365e-05				High	21.45	0.970732	High	18.17	2.05671				High	16.92	2.78839	0
	TELLETAEIR	4	1	1	Q10289		1174.63	0	0.001378				High	21.24	0.276597	High	29.07	0.0436676	High	18.45	0.526547	High	15.89	0.948086	0
	GTGLMAPNNIVSQGIEK	4	1	1	Q10289		1728.9	0	7.82e-05				High	13.87	2.814	High	50.74	0.000573889	High	22.24	0.438224	High	18.17	1.03712	0
	WIETQDVILSPPVSAER	6	1	1	Q10289		1940.01	0	1.703e-06				High	12.73	3.78401	High	14.23	2.67132	High	25.72	0.216611	High	24.47	0.262774	0
	SLTGTYLDVLESGAK	1	1	1	Q10289		1553.81	0	1.05e-05							High	68.89	6.17848e-06							0
	YIHVSELGNTVGSGIGGMSALR	2	1	1	Q10289		2218.13	0	1.01e-06							High	56.06	0.000286638				High	60.23	0.0001094	0
	EYLYLEEELDAMK	3	1	1	Q10289		1645.76	0	0.0002154							High	52.8	0.000367365	High	19.07	0.942105	High	17.59	1.28371	0
	GGAGAWMLNGALQILR	2	1	1	Q10289		1627.87	0	6.473e-06							High	33.96	0.0198485				High	45.13	0.00150689	0
	DIEIISSESGAPEVVLHGEAAK	1	1	1	Q10289		2251.15	0	0.0001266							High	33.46	0.0495448							0
	TPLPIVDLK	3	1	1	Q10289		995.613	0	0.001582							High	33.27	0.00188391	High	40.99	0.000318464	High	41.15	0.000306945	0
	HGDQVEIFEIPDSTEWSVR	3	1	1	Q10289		2244.06	0	8.392e-10							High	31.87	0.092936	High	38.72	0.0196447	High	30.36	0.13029	0
	MRPEVEQELAHTLLLELLAYQFASPVR	1	1	1	Q10289	M1(Oxidation)	3169.67	0	0.001162							High	31.83	0.0617433							0
	VQNPDLDLEAYR	3	1	1	Q10289		1432.71	0	4.416e-07							High	31.26	0.0351266	High	45.16	0.00143861	High	33.17	0.0227479	0
	AGTWTFPATLPAESDISK	3	1	1	Q10289		1891.94	0	3.197e-05							High	31.15	0.0721703	High	13.87	3.67748	High	11.41	6.55191	0
	GMDTRPAQVILPLSPNHGTFGNDGLYSESK	1	1	1	Q10289	N22(Deamidated)	3202.56	0	0.003878							High	30.17	0.218959							0
	AQLDLWNEEHGEFYASGIAPIFSPLK	1	1	1	Q10289		2932.44	0	0.0005466							High	29.77	0.208136							0
	SVDGNWEFNK	1	1	1	Q10289		1195.54	0	0.001246							High	23.08	0.10013							0
	GGAGAWMLNGALQILR	2	1	1	Q10289	N9(Deamidated)	1628.86	0	6.65e-05							High	19.04	0.713503	High	25.76	0.153303				0
	EFGATPEKPEEVPLDELGAIMQSSFNGSLGK	1	1	1	Q10289	N26(Deamidated)	3278.58	0	0.000546							High	17.29	4.67248							0
	DILQESFINTANAWINMLLLSASGPIK	4	1	1	Q10289	N12(Deamidated)	2960.56	0	0.008331							High	12.35	5.6726	High	17.79	1.54448	High	32.98	0.0480088	0
	MPGGFNNSAVR	2	1	1	Q10289		1149.55	0	3.198e-06										High	70.01	2.25979e-06	High	72.58	1.25046e-06	0
	MRPEVEQELAHTLLLELLAYQFASPVR	1	1	1	Q10289	Q7(Deamidated)	3154.67	0	1.141e-10										High	42.25	0.00516141				0
	VMFPSEGIQTDGIK	2	1	1	Q10289		1521.76	0	0.002812										High	40.66	0.00470739	High	10.18	5.70364	0
	IVEIGPSPTLAGMAK	1	1	1	Q10289		1483.82	0	4.909e-05													High	42.69	0.0018032	0
	IIEAELFHGYNPEK	1	1	1	Q10289		1659.84	0	0.0001051													High	22.07	0.459754	0
	ETIPFLHIR	4	1	1	Q10289		1125.64	0.001	0.01338				High	33.8	0.00435629	High	41.77	0.000771717	High	27.79	0.02046	High	26.54	0.0278384	0
	SIEEVSPQK	3	1	1	Q10289		1016.53	0.001	0.01137				High	18.17	0.354342				High	30.51	0.0206739	High	15.65	0.633028	0
	EFGATPEKPEEVPLDELGAIMQSSFNGSLGK	1	1	1	Q10289		3277.59	0.001	0.01559							High	11.42	18.0133							0
	EIDGIDSR	2	1	1	Q10289		904.439	0.002	0.02023							High	24.84	0.0629943	High	33.96	0.00781483				0
	GETYQLAK	2	1	1	Q10289		909.468	0.002	0.0213							High	21.04	0.114515				High	12.76	0.77066	0
	FVAGQIPLGWDPK	1	1	1	Q10289		1427.77	0.002	0.03075							High	12.04	2.19748							0
	VISDTLR	1	1	1	Q10289		803.463	0.003	0.04849				High	25.54	0.0628322										0
	LKYENMDAALSINR	1	1	1	Q10289		1637.83	0.003	0.04517				High	19.41	0.815032										1
	IMLTNILR	2	1	1	Q10289		973.588	0.003	0.0553							High	19.78	0.118346				High	22.53	0.0628279	0
	GLGWNLDYIVPFAAIPENGR	1	1	1	Q10289	N18(Deamidated)	2203.11	0.003	0.06406													High	17.98	1.80955	0
	SVIDAPPVFK	1	1	1	Q10289		1072.6	0.003	0.06008													High	16.68	1.07821	0
	DPTIAPIR	1	1	1	Q10289		882.504	0.004	0.059							High	35.43	0.00196196							0
	SGFVPGNR	1	1	1	Q10289		833.426	0.006	0.0835				High	30.61	0.0127737										0
	GMVDLEK	2	1	1	Q10289		791.396	0.007	0.09956				High	20.16	0.131081	High	14.52	0.480329							0
P78820	Acetyl-CoA carboxylase OS=Schizosaccharomyces pombe (strain 972 / ATCC 24843) GN=cut6 PE=1 SV=2 - [ACAC_SCHPO]	41.71	1	63	63	218	292.075	11.84	19	20	778.693	27.32	39	47	967.748	36.36	51	57	503.094	25.7	37	41	944.086	32.89	46	53	2280	256.682	6.44287
	Sequence	# PSMs	# Proteins	# Protein Groups	Protein Group Accessions	Modifications	MH+ [Da]	q-Value	PEP	A2	IonScore A2	Exp Value A2	B2	IonScore B2	Exp Value B2	C2	IonScore C2	Exp Value C2	D2	IonScore D2	Exp Value D2	E2	IonScore E2	Exp Value E2	# Missed Cleavages
	LMPIYQQISIHFADLHDR	7	1	1	P78820		2197.12	0	0.01469	High	58.5	0.000140901	High	43.23	0.00479138	High	42.7	0.005373	High	52.8	0.000529006	High	57.7	0.000167956	0
	TTVEYLVR	4	1	1	P78820		980.541	0	0.03011	High	49.3	0.000152737	High	18.72	0.174559	High	27.51	0.0210241	High	48.61	0.000179037				0
	IVNWISYIPDKR	4	1	1	P78820		1503.83	0	0.001853	High	46.29	0.000886986	High	30.28	0.035393				High	31.02	0.0304807	High	56.46	7.93062e-05	1
	SSPGSYHLFLNGSR	5	1	1	P78820	N11(Deamidated)	1522.73	0	0.01097	High	46.07	0.00143607	High	22.51	0.338873	High	28.79	0.0799384	High	18.53	0.848702	High	23.6	0.249032	0
	MGGIPTGVIAVETR	5	1	1	P78820		1400.76	0	0.01524	High	43.77	0.00218694	High	38.26	0.00764311	High	36.64	0.0120416	High	36.76	0.0108278	High	21.79	0.273495	0
	ISSTIVAQSAR	5	1	1	P78820		1132.63	0	3.815e-05	High	40.47	0.00213588	High	31.07	0.0193453	High	55.91	6.3471e-05	High	19.34	0.277062	High	62.19	1.47363e-05	0
	HIEPALAFQLELGR	5	1	1	P78820		1593.88	0	5.52e-08	High	38.64	0.00499905	High	46.63	0.000798468	High	38.41	0.00524209	High	52.25	0.000213545	High	48.43	0.000539026	0
	QVEAALGGFLER	5	1	1	P78820		1289.68	0	0.04565	High	37.12	0.00718128	High	34.81	0.0121741	High	32.03	0.0250959	High	35.29	0.010427	High	27.48	0.0658321	0
	YGSYIVDALASYK	2	1	1	P78820		1449.73	0	1.535e-05	High	36.75	0.0105252				High	52.57	0.000289125							0
	SSSNVWGYFSVGTAGGIHEFADSQFGHIFSFAESR	1	1	1	P78820	Q24(Deamidated)	3782.72	0	0.003062	High	36.61	0.0746166													0
	DGNLVHYNEDER	3	1	1	P78820		1460.64	0	0.02757	High	33.78	0.0179244				High	20.34	0.394384							0
	DDLSADDLSTIK	3	1	1	P78820		1292.62	0	1.4e-05	High	19.86	0.38522				High	34.61	0.0129208	High	19.27	0.432402				0
	LPEMLSASSK	1	1	1	P78820		1062.55	0	0.04204	High	19.58	0.286951													0
	LNQILSDFRDDLLEHNVR	8	1	1	P78820		2197.14	0	0.0008399	High	17.37	1.72604	High	31.05	0.0734981	High	25.54	0.261382				High	22.83	0.494874	1
	LINDILDALEVIGHEQTDLNHIFINFTPAFGLAPK	2	1	1	P78820	N20(Deamidated)	3890.06	0	0.05297	High	11.58	5.53239													0
	GLLEEYYNVEK	1	1	1	P78820		1356.67	0	0.08343	High	10.99	3.51902													0
	TAQAINDFNHGEQLPLFILANWR	4	1	1	P78820		2668.37	0	3.25e-07				High	63.38	6.24739e-05	High	43.63	0.00554244	High	38.71	0.0185123	High	44.87	0.00448188	0
	QPGASLDAGDILGILTLDDPSR	4	1	1	P78820		2224.15	0	1.06e-05				High	61.1	7.33942e-05	High	23.19	0.452149				High	48.48	0.0014219	0
	LQVEHPTTEMVSGVNLPAAQLQVAMGLPLSR	4	1	1	P78820	Q20(Deamidated)	3287.73	0	1.242e-06				High	60.92	7.33041e-05	High	40.47	0.00818455				High	68.51	1.28879e-05	0
	LRDEIPTAEYLISETHR	3	1	1	P78820		2043.05	0	0.0004369				High	58.46	0.000141919	High	53.69	0.000405971				High	41.39	0.00709042	1
	EVYTSNLQLGGTQVMHR	4	1	1	P78820		1932.96	0	1.727e-07				High	51.3	0.000744275	High	40.27	0.00933615	High	38.37	0.0142198	High	88.95	1.24421e-07	0
	VIALALSHSR	1	1	1	P78820		1066.64	0	0.0005354				High	48.96	6.98816e-05										0
	SEPSTFVSLYFNDILR	4	1	1	P78820		1887.95	0	1.667e-05				High	47.74	0.00143616	High	60.07	8.74786e-05	High	56.71	0.000187175	High	41.82	0.0055605	0
	FGTMIAAETFDELENNLALAIDR	4	1	1	P78820		2554.25	0	7.165e-06				High	47.25	0.00308165	High	54.56	0.000578984	High	28.61	0.226413	High	41.24	0.0122627	0
	IDEETNIVTVDDDVYQK	3	1	1	P78820		1995.94	0	1.377e-06				High	46.69	0.00253504	High	24.62	0.400884	High	10.69	10.2159				0
	SSSNVWGYFSVGTAGGIHEFADSQFGHIFSFAESR	4	1	1	P78820		3781.72	0	5.181e-16				High	44.98	0.0106822	High	51.63	0.00231748	High	60.23	0.000320328	High	52.48	0.001877	0
	IVFIGPPGSAMR	4	1	1	P78820		1244.68	0	0.001722				High	44.84	0.00116146	High	28.26	0.0573979	High	55.14	0.000118039	High	58.54	5.38141e-05	0
	NNLLITILDLMK	4	1	1	P78820		1400.82	0	3.384e-05				High	44.01	0.00100092	High	36.14	0.00593458	High	20.95	0.195257	High	16.36	0.564144	0
	LQVEHPTTEMVSGVNLPAAQLQVAMGLPLSR	4	1	1	P78820		3286.74	0	1.35e-06				High	41.86	0.00510225	High	49.89	0.000992318	High	42.82	0.00485567	High	52.54	0.000471101	0
	EFSENEFTTGWLDR	2	1	1	P78820		1730.77	0	0.0002127				High	41.76	0.00411753	High	32.77	0.0320238							0
	NHELPYSEWSAHYSALVNR	7	1	1	P78820		2273.07	0	5.973e-06				High	39.57	0.0164011	High	45.76	0.00397129	High	14.69	5.04344	High	45.75	0.00394586	0
	AYSVLEINYHTEAGTPYVLTWR	4	1	1	P78820		2583.29	0	1.227e-05				High	38.98	0.0184778	High	46.45	0.0034683	High	12.16	9.07946	High	24.33	0.539076	0
	FYFLELNPR	3	1	1	P78820		1198.62	0	0.001498				High	35.27	0.0062405	High	25.14	0.0641481	High	20.01	0.209018				0
	SLTDGGLLVLLNGHSYTVYYR	3	1	1	P78820		2341.22	0	0.00104				High	30.08	0.0984693	High	27.02	0.19712				High	21.56	0.673096	0
	AVGIGAYLVR	3	1	1	P78820		1018.6	0	0.0005726				High	28.47	0.020766				High	30.67	0.0104559	High	21.19	0.0927598	0
	GFDYIYLTPEAYER	4	1	1	P78820		1736.82	0	0.0008629				High	26.53	0.171084	High	20.27	0.704323	High	22.96	0.373552	High	51.06	0.0006099	0
	AVQIEGQPIILTGAPALNK	5	1	1	P78820		1933.11	0	4.741e-11				High	25.38	0.0540355	High	26.12	0.04557	High	44.05	0.000694616				0
	IGYPVMIK	4	1	1	P78820		920.528	0	0.002156				High	25.16	0.03627	High	25.8	0.0313002	High	20.96	0.0962014	High	24.96	0.0382985	0
	NNLLITILDLMK	4	1	1	P78820	N2(Deamidated)	1401.8	0	0.003013				High	25.12	0.0939748				High	20.71	0.260274				0
	VNADYIR	4	1	1	P78820		850.443	0	0.002969				High	23.44	0.0742752	High	14.43	0.632816	High	14.25	0.616373	High	65.2	4.95272e-06	0
	LSNFNIEPVFTDNHNIHVYR	4	1	1	P78820		2429.2	0	3.231e-06				High	22.57	0.827258	High	39.05	0.0188482	High	29.22	0.181905	High	29.93	0.155181	0
	SIGQPGSMHLRPISTPYPTK	4	1	1	P78820		2167.13	0	0.0004742				High	19.17	1.09378	High	12.78	4.62117	High	17.57	1.45412	High	11.79	5.59573	0
	AQLMGTTFVYDFPELFR	4	1	1	P78820		2035	0	8.153e-06				High	16.08	2.72621	High	46.5	0.00249953				High	36.56	0.0247738	0
	LINDILDALEVIGHEQTDLNHIFINFTPAFGLAPK	4	1	1	P78820		3889.05	0	0.001288				High	12.82	4.23402	High	20.53	0.797489	High	25.7	0.228646	High	21.8	0.564893	0
	NVYDIEFIYDNTR	2	1	1	P78820		1661.78	0	4.109e-05							High	71.07	6.1944e-06				High	69.85	8.18797e-06	0
	ITQLIPSLTIR	2	1	1	P78820		1254.78	0	0.0002768							High	62.73	3.25334e-06				High	47.77	0.000101937	0
	WLIAGKEDEDSFLYGLFDK	2	1	1	P78820		2246.1	0	1.597e-06							High	59.19	0.000167379				High	38.49	0.0198777	1
	LGELVGYASAGTIEYLYEPENDRFYFLELNPR	1	1	1	P78820	N21(Deamidated)	3739.84	0	0.0008548							High	56.28	0.000596887							1
	ENPNILTTEEVVTETGELR	3	1	1	P78820		2144.07	0	1.732e-05							High	39	0.0144084	High	27	0.239032	High	34.51	0.0401079	0
	MNVHAVWAGWGHASENPK	2	1	1	P78820		1990.93	0	4.727e-05							High	38.61	0.0149083				High	35.49	0.0309748	0
	GMIDSLAQVLTELDENEKK	3	1	1	P78820		2133.08	0	0.0003007							High	31.76	0.0709482	High	10.35	9.64548	High	34.74	0.0349839	1
	SSVVESHYGDAK	2	1	1	P78820		1278.6	0	0.001249							High	30.13	0.0297461				High	17.28	0.575235	0
	EDEDSFLYGLFDK	2	1	1	P78820		1577.7	0	0.0003867							High	28.21	0.0899253				High	18.34	0.824371	0
	IGVADEIVPLFNIAWVDPDSPEK	4	1	1	P78820		2524.3	0	9.741e-07							High	26.15	0.296653	High	41.77	0.00777039	High	40.08	0.0114766	0
	FAQAFQQVLDELPGSPVFVMK	2	1	1	P78820		2351.21	0	0.001041							High	17.46	1.81178				High	17.61	1.86471	0
	DYIASHGGHTVITSILIANNGIAAVK	2	1	1	P78820		2635.42	0	0.0006727							High	11.35	4.65344				High	14.85	2.11626	0
	SLTDGGLLVLLNGHSYTVYYR	1	1	1	P78820	N12(Deamidated)	2342.19	0	8.968e-06													High	41.69	0.00797584	0
	SSPGSYHLFLNGSR	1	1	1	P78820		1521.75	0	0.0002805													High	34.78	0.0181632	0
	QPVFVYIPPFSELR	1	1	1	P78820		1691.91	0	0.001055													High	16.27	1.27466	0
	ISPVLDK	5	1	1	P78820		771.461	0.001	0.01746	High	24.37	0.0416778	High	24.47	0.0407291	High	24.7	0.0386282	High	15.91	0.292351	High	15.6	0.313982	0
	LFVSIIEK	3	1	1	P78820		948.576	0.001	0.01905	High	22.64	0.0212356				High	32.16	0.00237173				High	20.83	0.0322155	0
	TENNSWIFK	3	1	1	P78820		1138.55	0.001	0.02086				High	13.56	1.18289				High	12.68	1.44859	High	13.15	1.40168	0
	LLSLMR	4	1	1	P78820		732.444	0.002	0.02245	High	21.45	0.0365233	High	35.22	0.0015331	High	24.45	0.018305	High	35.06	0.00159063				0
	DMFNEVLK	1	1	1	P78820		995.487	0.002	0.02274							High	25.79	0.0684128							0
	FLVETGEHIK	1	1	1	P78820		1172.63	0.002	0.03971													High	15.37	1.41426	0
	DVEFYPSQNGYDPR	1	1	1	P78820	N9(Deamidated)	1687.72	0.004	0.02762										High	10.8	4.75353				0
	SAYPSYYTYR	1	1	1	P78820		1270.57	0.007	0.09759				High	21.3	0.238702										0
	ELYGLPR	1	1	1	P78820		847.467	0.007	0.1213													High	18.39	0.34843	0
	FFYWR	1	1	1	P78820		818.398	0.008	0.09337										High	23.92	0.0590015				0
Q9UT19	Probable 5-methyltetrahydropteroyltriglutamate--homocysteine methyltransferase OS=Schizosaccharomyces pombe (strain 972 / ATCC 24843) GN=met26 PE=1 SV=1 - [METE_SCHPO]	59.69	1	35	35	151	195.631	23.04	14	14	877.563	51.57	31	39	952.193	59.69	35	46	329.652	31.94	18	21	591.916	44.11	26	31	764	85.2863	6.37939
	Sequence	# PSMs	# Proteins	# Protein Groups	Protein Group Accessions	Modifications	MH+ [Da]	q-Value	PEP	A2	IonScore A2	Exp Value A2	B2	IonScore B2	Exp Value B2	C2	IonScore C2	Exp Value C2	D2	IonScore D2	Exp Value D2	E2	IonScore E2	Exp Value E2	# Missed Cleavages
	TSAEELLATAK	5	1	1	Q9UT19		1133.6	0	2.347e-05	High	51.64	0.000234437	High	75.02	1.07653e-06	High	52.63	0.000190742	High	56.27	7.93121e-05	High	64.17	1.28629e-05	0
	GMLTAPITILR	5	1	1	Q9UT19		1185.7	0	0.0005865	High	40.44	0.00389021	High	41.5	0.00304771	High	41.46	0.00307591	High	40.88	0.00351539	High	44.46	0.00154161	0
	VPPVSEFK	4	1	1	Q9UT19		902.498	0	0.04324	High	35.69	0.00729739	High	21.81	0.178307	High	25	0.0855396				High	36.1	0.00663999	0
	WFAFAVEK	2	1	1	Q9UT19		997.515	0	0.09578	High	29.67	0.0277289				High	23.39	0.111099							0
	LPLFPTTTIGSFPQTK	7	1	1	Q9UT19		1747.97	0	7.167e-08	High	29.47	0.0466606	High	85.11	1.25794e-07	High	66.8	8.73326e-06	High	88.58	4.94378e-08	High	70.01	4.08059e-06	0
	SAVLGFPR	5	1	1	Q9UT19		846.483	0	0.002096	High	27.98	0.0251569	High	37.18	0.00169412	High	33.33	0.00733934	High	32.5	0.00888499	High	29.83	0.0164307	0
	ATEAYWSGK	5	1	1	Q9UT19		1012.47	0	0.001856	High	27.5	0.0494362	High	30.3	0.0245913	High	17.71	0.437139	High	21.37	0.20133	High	35.75	0.00649217	0
	VQVASSSSILHIPHSLSGEDQINPEIK	4	1	1	Q9UT19		2885.5	0	1.52e-08	High	27.49	0.206221	High	17.52	2.02235	High	51.2	0.00087995	High	19.04	1.44696				0
	LILTTYFGSLQSNADVLK	9	1	1	Q9UT19		1983.08	0	5.219e-07	High	27.14	0.0996896	High	60.74	4.73532e-05	High	76.03	1.38201e-06	High	41.23	0.00426023	High	58.61	7.73992e-05	0
	NDMVQYFGER	5	1	1	Q9UT19		1258.55	0	0.003459	High	21.03	0.252435	High	42.23	0.00181917	High	57.04	6.0001e-05	High	41.22	0.00240497	High	54.49	0.000108112	0
	LLPVYVELIK	5	1	1	Q9UT19		1186.74	0	0.008019	High	16.75	0.0877098	High	29.35	0.00482001	High	27.45	0.00746531	High	14.81	0.137103	High	10.71	0.35241	0
	DDVHDSVQAQQIALGLRDEVLDLEK	7	1	1	Q9UT19		2806.42	0	9.708e-05	High	15.23	4.49425	High	33.55	0.06522	High	29.54	0.164203	High	11.4	10.6637	High	21.56	0.985555	1
	ALAVLGENQIISVGVVSGR	6	1	1	Q9UT19		1882.08	0	8.452e-10				High	81.41	1.87197e-07	High	74.7	8.53887e-07	High	38.25	0.00376303	High	44.69	0.00100529	0
	LSGLSSLDTYFAMGR	3	1	1	Q9UT19		1617.79	0	6.687e-07				High	81.09	5.47738e-07	High	81.38	5.13085e-07				High	81.56	5.29958e-07	0
	LDADVVSIENSK	2	1	1	Q9UT19		1289.66	0	4.145e-06				High	61.66	3.05005e-05	High	83.63	1.81424e-07							0
	GSSIKPIELLPK	3	1	1	Q9UT19		1281.78	0	3.475e-05				High	61.19	4.14378e-06	High	32.52	0.00305068				High	30.78	0.00451226	0
	FQEEVGLDVLVHGEPER	4	1	1	Q9UT19		1952.97	0	2.813e-07				High	55.82	0.000266269	High	51.38	0.000766352	High	62.89	5.31007e-05	High	51.58	0.000725953	0
	AQGVDIIPSNDFSLYDQIMDHSFSFNVIPPR	5	1	1	Q9UT19		3522.71	0	5.519e-08				High	54.77	0.000922091	High	77.88	4.42028e-06				High	41.07	0.021866	0
	GLPIAGVHVDVVR	2	1	1	Q9UT19		1331.78	0	1.095e-05				High	49.17	0.000163431	High	58.91	1.73514e-05							0
	AESPITNVEAVR	3	1	1	Q9UT19		1285.68	0	6.395e-05				High	40.46	0.00331465	High	56.02	6.92596e-05				High	54.12	0.000142704	0
	ESQYAQSITSKPMK	3	1	1	Q9UT19		1597.79	0	0.001184				High	38.4	0.00907013	High	10.27	6.22567				High	34.33	0.0233747	0
	ALDEFLEAK	2	1	1	Q9UT19		1035.54	0	0.002951				High	36.97	0.00446019	High	32.81	0.0116239							0
	EAGIITRPVLVGPVTYLFIAK	5	1	1	Q9UT19		2257.33	0	2.646e-07				High	36.74	0.00122865	High	26.6	0.0150956	High	19.25	0.0766584	High	17.96	0.103971	0
	DDVHDSVQAQQIALGLR	3	1	1	Q9UT19		1864.95	0	3.757e-05				High	33.43	0.0384942	High	31.07	0.068666				High	31.94	0.0552411	0
	AAVDVPAGEMVK	4	1	1	Q9UT19		1186.61	0	3.242e-05				High	30.92	0.0334561	High	39.41	0.0047367	High	26.32	0.0960218	High	26.78	0.0863714	0
	GLISQEEYDAFIR	2	1	1	Q9UT19		1540.76	0	0.0001021				High	29.66	0.0625069	High	47.88	0.000896113							0
	KATEAYWSGK	2	1	1	Q9UT19		1140.57	0	0.0002044				High	26.23	0.0707549	High	45.26	0.000884619							1
	AAVDVPAGEMVK	2	1	1	Q9UT19	M10(Oxidation)	1202.61	0	0.0002424				High	14.44	1.62247	High	23.86	0.185429							0
	GWPETTADLK	3	1	1	Q9UT19		1117.55	0	0.005631				High	13.25	1.61108	High	27.85	0.0576667				High	22.54	0.195294	0
	LTEAGAEYIQIDEPILTLDLPQEILASYK	1	1	1	Q9UT19		3246.71	0	1.56e-05							High	30.77	0.0778902							0
	GMLTAPITILR	2	1	1	Q9UT19	M2(Oxidation)	1201.7	0	0.0009278							High	25.61	0.0963137				High	24.53	0.123506	0
	MEGFVFTVNGWVQSYGSR	4	1	1	Q9UT19	Q13(Deamidated)	2064.94	0	9.489e-05							High	24.69	0.384795				High	27.92	0.183068	0
	MEGFVFTVNGWVQSYGSR	1	1	1	Q9UT19		2063.97	0	0.003499							High	10.54	10.1333							0
	LLNVLSR	5	1	1	Q9UT19		814.515	0.001	0.134	High	40.52	0.00135291	High	42.59	0.000839982	High	42.31	0.000895921	High	38.87	0.0019782	High	41.37	0.00111242	0
	EAYETLGK	4	1	1	Q9UT19		910.452	0.001	0.009788				High	24.85	0.0540112	High	26.63	0.0358496	High	23.19	0.079156	High	21.96	0.105071	0
	LSGLSSLDTYFAMGR	2	1	1	Q9UT19	M13(Oxidation)	1633.79	0.001	0.006603				High	21.35	0.50858	High	23.41	0.310105							0
	DDVHDSVQAQQIALGLRDEVLDLEK	2	1	1	Q9UT19	Q11(Deamidated)	2807.42	0.001	0.009602										High	19.4	1.67343				1
	ESQYAQSITSKPMK	1	1	1	Q9UT19	M13(Oxidation)	1613.79	0.001	0.01896													High	11.51	5.04664	0
	WAIDAFR	4	1	1	Q9UT19		878.452	0.002	0.02998				High	25.47	0.0329199	High	26.96	0.0233592	High	26.68	0.0249148	High	23.41	0.0529003	0
	AEWDEYLK	5	1	1	Q9UT19		1053.49	0.003	0.05332	High	27.28	0.0421839	High	22.76	0.122352	High	14.61	0.780093	High	10.59	1.99474	High	20.4	0.210675	0
	AQGVDIIPSNDFSLYDQIMDHSFSFNVIPPR	1	1	1	Q9UT19	N26(Deamidated)	3523.71	0.003	0.05936													High	14.25	10.0236	0
	EISDVVK	1	1	1	Q9UT19		789.436	0.004	0.06804							High	17.23	0.416316							0
	NDMVQYFGER	1	1	1	Q9UT19	M3(Oxidation)	1274.55	0.005	0.08032							High	16.77	0.624822							0
Q92345	Probable pyruvate decarboxylase C1F8.07c OS=Schizosaccharomyces pombe (strain 972 / ATCC 24843) GN=SPAC1F8.07c PE=1 SV=3 - [PDC2_SCHPO]	48.33	1	21	21	133	254.174	23.55	10	10	939.383	43.23	18	31	936.123	46.05	18	38	379.459	38.84	16	22	590.957	46.4	19	32	569	61.6802	5.64307
	Sequence	# PSMs	# Proteins	# Protein Groups	Protein Group Accessions	Modifications	MH+ [Da]	q-Value	PEP	A2	IonScore A2	Exp Value A2	B2	IonScore B2	Exp Value B2	C2	IonScore C2	Exp Value C2	D2	IonScore D2	Exp Value D2	E2	IonScore E2	Exp Value E2	# Missed Cleavages
	FEVEMQWGHIGWSVPSAMGYAVAAPER	6	1	1	Q92345		3005.41	0	2.391e-19	High	79.69	2.76767e-06	High	83.81	1.08636e-06	High	79.67	2.81281e-06	High	95.58	6.97408e-08	High	80.61	2.23236e-06	0
	AAGAESAFVK	5	1	1	Q92345		950.494	0	0.0001206	High	55.23	6.23826e-05	High	61.83	1.40743e-05	High	51.73	0.000144021	High	57.65	3.56466e-05	High	47.2	0.000395383	0
	NYAGVYWGEVSSSETTK	5	1	1	Q92345		1877.86	0	9.516e-06	High	51.58	0.000605366	High	56.2	0.000215655	High	33.66	0.0369822	High	14.8	2.88415	High	36.92	0.018027	0
	ATDIAAELISK	5	1	1	Q92345		1131.63	0	0.01722	High	47.02	0.000645481	High	40.37	0.00298458	High	41.87	0.00211292	High	40.64	0.00287372	High	44.03	0.00128494	0
	TGEELTSAIK	6	1	1	Q92345		1048.55	0	7.867e-08	High	44.43	0.00111058	High	59.04	3.82323e-05	High	63.65	1.32261e-05	High	67.52	5.45194e-06	High	57.32	5.68107e-05	0
	LPVLIFLLNNR	8	1	1	Q92345		1311.81	0	4.526e-05	High	41.26	0.00102873	High	56.82	2.85958e-05	High	55.6	3.78706e-05	High	50.63	0.000119366	High	48.07	0.000214438	0
	DAESTMTVGTYLAQR	8	1	1	Q92345		1642.77	0	4.721e-05	High	22.8	0.376287	High	58.45	9.99511e-05	High	58.52	9.85639e-05	High	29.18	0.0821917	High	48.89	0.000812823	0
	RAEDAPVMIDHAIR	5	1	1	Q92345		1593.82	0	2.852e-08	High	22.71	0.380148	High	78.48	1.00398e-06	High	37.19	0.0144289	High	33.49	0.0318772	High	43.24	0.00340743	1
	NHFVVPGDYNLR	8	1	1	Q92345		1430.72	0	0.006255	High	21.24	0.383703	High	31.58	0.0346817	High	34.16	0.0210272	High	26.11	0.134209	High	37.51	0.00905724	0
	FEVEMQWGHIGWSVPSAMGYAVAAPER	5	1	1	Q92345	Q6(Deamidated)	3006.41	0	6.477e-08				High	106.52	5.42847e-09	High	52.73	0.00129387	High	18.04	3.8466	High	17.52	4.30933	0
	TIVMVGDGSFQLTGQEISQMIR	6	1	1	Q92345		2410.21	0	1.871e-09				High	89	1.63346e-07	High	113.02	6.79231e-10				High	49.24	0.00157184	0
	TIVMVGDGSFQLTGQEISQMIR	3	1	1	Q92345	Q11(Deamidated)	2411.21	0	1.101e-07				High	76.17	3.2186e-06							High	55.82	0.000348742	0
	AVYESSDLVIGAGVLFNDYSTVGWR	6	1	1	Q92345		2718.33	0	1.42e-08				High	68.14	2.79991e-05	High	93.55	8.13814e-08	High	58.31	0.000264299	High	66.92	3.4103e-05	0
	LPVLIFLLNNR	4	1	1	Q92345	N9(Deamidated)	1312.8	0	8.673e-05				High	65.87	5.21525e-06	High	22.8	0.105749	High	37.69	0.00342985	High	32.67	0.0108962	0
	TIVMVGDGSFQLTGQEISQMIR	1	1	1	Q92345	M4(Oxidation)	2426.2	0	6.294e-07				High	65.31	4.31211e-05										0
	VYMAEFLELLAK	4	1	1	Q92345		1426.77	0	1.976e-05				High	51.3	0.000242408	High	39.03	0.00426338	High	24.41	0.120265	High	35.89	0.0088239	0
	FEVEMQWGHIGWSVPSAMGYAVAAPER	3	1	1	Q92345	M18(Oxidation)	3021.4	0	0.0001699				High	39.26	0.0304268	High	21.15	1.96253				High	26.46	0.584064	0
	GYTIEIQIHDGPYNR	8	1	1	Q92345		1775.87	0	1.249e-05				High	37.92	0.0136171	High	43.58	0.0036113	High	32.52	0.046096	High	40.92	0.0066629	0
	VYMAEFLELLAK	3	1	1	Q92345	M3(Oxidation)	1442.76	0	0.0003403				High	35.98	0.0134754	High	14.66	1.50642				High	23.05	0.219732	0
	AEDAPVMIDHAIR	6	1	1	Q92345		1437.72	0	3.531e-05				High	33.25	0.0298558	High	40.67	0.00541219	High	11.87	4.16733	High	33.01	0.0318022	0
	KEKPILLAGPK	1	1	1	Q92345		1193.76	0	0.008608				High	31.71	0.000674528										1
	AAPNPNILLNSDYTSVSIPGYVFSR	4	1	1	Q92345		2695.38	0	1.725e-05				High	21.61	0.948389	High	38.94	0.0172192				High	14.99	4.15847	0
	AAPNPNILLNSDYTSVSIPGYVFSR	6	1	1	Q92345	N10(Deamidated)	2696.37	0	0.005247				High	14.28	5.27589	High	59.25	0.000176671	High	12.84	7.33974				0
	QIQGLVDSNTTLYAETGDSWFNGLQMK	2	1	1	Q92345		3016.43	0	4.069e-07							High	66.07	6.00753e-05				High	29.43	0.267161	0
	AVYESSDLVIGAGVLFNDYSTVGWR	1	1	1	Q92345	N17(Deamidated)	2719.34	0	7.996e-05													High	35.06	0.0555786	0
	FEVEMQWGHIGWSVPSAMGYAVAAPER	1	1	1	Q92345	Q6(Deamidated); M18(Oxidation)	3022.41	0	0.007216													High	10.39	23.1956	0
	LVEIGIK	5	1	1	Q92345		771.498	0.001	0.02167	High	26.73	0.015075	High	24.68	0.024169	High	28.12	0.0109461	High	22.98	0.0357485	High	24.26	0.0266231	0
	HKLPVLIFLLNNR	3	1	1	Q92345		1576.97	0.001	0.01306				High	29.27	0.00278015	High	20.27	0.0220835				High	14.24	0.0715737	1
	HKLPVLIFLLNNR	2	1	1	Q92345	N11(Deamidated)	1577.95	0.001	0.03287							High	24.18	0.0200521				High	22.64	0.0266806	1
	EKPILLAGPK	1	1	1	Q92345		1065.67	0.001	0.01446										High	28.46	0.00228097				0
	QIQGLVDSNTTLYAETGDSWFNGLQMK	1	1	1	Q92345	N22(Deamidated)	3017.41	0.002	0.03252							High	14.49	8.83922							0
	TKDAESTMTVGTYLAQR	1	1	1	Q92345		1871.92	0.006	0.1047													High	13.59	4.30303	1
Q9UT24	Pre-mRNA-splicing factor brr2 OS=Schizosaccharomyces pombe (strain 972 / ATCC 24843) GN=brr2 PE=1 SV=1 - [BRR2_SCHPO]	55.65	1	92	92	305					1926.12	44.72	72	98	893.079	37.27	54	60	1733.34	48.99	75	93	807.75	30.65	46	54	2176	248.653	5.22412
	Sequence	# PSMs	# Proteins	# Protein Groups	Protein Group Accessions	Modifications	MH+ [Da]	q-Value	PEP	A2	IonScore A2	Exp Value A2	B2	IonScore B2	Exp Value B2	C2	IonScore C2	Exp Value C2	D2	IonScore D2	Exp Value D2	E2	IonScore E2	Exp Value E2	# Missed Cleavages
	HGIAYISEITSSNDQNIVQYLYR	2	1	1	Q9UT24		2684.33	0	1.362e-11				High	117.94	2.67636e-10				High	95.55	4.39789e-08				0
	GLLEIVTSAAEYEQLPIR	6	1	1	Q9UT24		2002.08	0	3.709e-06				High	80.07	5.35302e-07	High	83.06	2.7978e-07	High	80.44	5.01074e-07	High	69.44	6.18869e-06	0
	ELPEWSHQAFLNTQSLNR	4	1	1	Q9UT24		2170.07	0	7.085e-07				High	73.01	6.19293e-06	High	43.33	0.0056996	High	55.85	0.000312279	High	18.1	1.88723	0
	VAASYYVTHNSMAIYNR	6	1	1	Q9UT24		1959.94	0	1.534e-07				High	72.37	6.49829e-06	High	58.28	0.000168579	High	65.65	3.0222e-05	High	31.35	0.0833588	0
	LDGFALVADMVYVTQSAGR	7	1	1	Q9UT24		2013.01	0	1.025e-07				High	71.5	7.09362e-06	High	51.3	0.00072426	High	52.29	0.000581643	High	44.12	0.00389581	0
	QLAFDLVTFSMADEDEYLFSLMENEAFNK	2	1	1	Q9UT24		3417.55	0	1.003e-06				High	67.89	5.03107e-05				High	46.53	0.0068389				0
	EVYDYILSFIQQYLGDQSPEILR	5	1	1	Q9UT24		2789.4	0	9.78e-15				High	65.25	4.8408e-05	High	33.5	0.0774996	High	66.89	3.37561e-05				0
	GIWTELSPQDVLQMLGR	8	1	1	Q9UT24		1943	0	2.9e-07				High	63.98	3.71349e-05	High	64.46	3.13155e-05	High	49.13	0.00111	High	35.04	0.0269306	0
	QRLDGFALVADMVYVTQSAGR	4	1	1	Q9UT24		2297.17	0	8.734e-16				High	60.35	0.000103974	High	33.68	0.0479117	High	78.08	1.76524e-06	High	44.95	0.00356837	1
	IEKPSTLPLELTQEVQEVR	3	1	1	Q9UT24		2209.21	0	1.471e-15				High	59.81	5.07212e-05				High	71.97	2.9257e-06	High	45.17	0.00139881	0
	VEDAALQQSLK	4	1	1	Q9UT24		1201.64	0	1.496e-05				High	59.38	3.65068e-05	High	31.71	0.0213488	High	48.94	0.000403993	High	29.87	0.0326117	0
	ALVQEMVNNFSK	3	1	1	Q9UT24	N8(Deamidated)	1380.69	0	0.002022				High	54.68	0.000186373	High	10.82	4.50815	High	20.71	0.47639				0
	VVGLSVSVANAR	2	1	1	Q9UT24		1171.68	0	8.198e-05				High	54.35	0.000104859				High	48.88	0.000368199				0
	IQTQVFNSVYK	4	1	1	Q9UT24		1326.71	0	0.0001684				High	52.18	0.000172522	High	48	0.000423166	High	25.69	0.0768856	High	28.45	0.0407235	0
	QSGTLTATELGK	4	1	1	Q9UT24		1205.64	0	6.44e-09				High	51.5	0.000246365	High	20.67	0.297821	High	62.45	1.97961e-05	High	59.23	4.14911e-05	0
	LVANPAYYGLQDITHESVSEFLSDLVETTMNDLSEAR	5	1	1	Q9UT24		4127.97	0	5.723e-13				High	51.21	0.0024896	High	23.29	1.48919	High	68.83	4.18742e-05				0
	LVGLSATLPNYTDVASFLHVDPK	4	1	1	Q9UT24		2457.3	0	9.625e-09				High	51.19	0.000621947	High	37.31	0.0155963	High	33.99	0.0326602	High	38.3	0.0120991	0
	VSIADMGSR	4	1	1	Q9UT24		935.463	0	0.001074				High	50.42	0.000177025	High	53.06	0.000105288	High	50.65	0.000167463	High	38.08	0.00256734	0
	VAELTGDSQLTK	3	1	1	Q9UT24		1261.66	0	2.494e-05				High	50.34	0.00037404	High	18.34	0.579624	High	24.49	0.121092				0
	AGRPQFDTYGEGIIITAHSELQYYLSLMNQQLPIESQFMR	3	1	1	Q9UT24		4645.28	0	1.081e-07				High	50.29	0.00237312	High	30.1	0.233364	High	38.58	0.0354247				0
	NQVLIFVHSR	7	1	1	Q9UT24		1212.68	0	0.0004941				High	50.2	0.000155664	High	31.31	0.0120556	High	45.6	0.000448939	High	28.37	0.023724	0
	VYNMVQSFPR	3	1	1	Q9UT24		1240.61	0	0.0006834				High	49.22	0.000485877	High	44.92	0.00129809				High	38.1	0.00680705	0
	ALEEETIGHLLR	6	1	1	Q9UT24		1380.75	0	5.497e-08				High	45.74	0.000806725	High	27.79	0.0503182	High	56.04	7.55368e-05	High	35.49	0.00847464	0
	ADLLHSAAILLEK	4	1	1	Q9UT24		1393.81	0	4.243e-10				High	45.06	0.000315008	High	32.35	0.00587924	High	52.17	6.12804e-05	High	33.28	0.00474593	0
	YNPLTDETR	4	1	1	Q9UT24		1108.53	0	0.003003				High	45.03	0.000648515	High	43.42	0.000982774	High	14	1.02314	High	28.37	0.0312196	0
	FLNEPLPMESHLQVWLHDAFVSEISTQTIESK	1	1	1	Q9UT24	Q13(Deamidated)	3726.86	0	5.639e-06				High	44.04	0.00860903										0
	SNAVIVMGTQYYDGK	1	1	1	Q9UT24		1645.79	0	0.003128				High	43.62	0.00349129										0
	EGVHDVFDIIDLDDEK	4	1	1	Q9UT24		1858.87	0	3.903e-05				High	42.85	0.00518022	High	24.86	0.326751	High	26.39	0.221234	High	21.82	0.656671	0
	ALVQEMVNNFSK	4	1	1	Q9UT24		1379.7	0	3.86e-05				High	41.96	0.00344188	High	48	0.000889918	High	37.26	0.0107121	High	63.84	2.35024e-05	0
	TNDSVFIGAPNGSGK	2	1	1	Q9UT24	N11(Deamidated)	1464.7	0	1.651e-06				High	41.36	0.00366666				High	34.92	0.0161537				0
	FLNEPLPMESHLQVWLHDAFVSEISTQTIESK	4	1	1	Q9UT24		3725.85	0	1.371e-05				High	41.13	0.0170601	High	27.83	0.316694	High	28.71	0.273546	High	21.21	1.6586	0
	EGVHDVFDIIDLDDEKR	3	1	1	Q9UT24		2014.97	0	0.0004067				High	39.35	0.0131186	High	24.24	0.417576	High	34.79	0.0367905				1
	SWILEALRPGAITIPDDGLNELNNNVVEK	4	1	1	Q9UT24		3190.67	0	1.215e-14				High	39.25	0.0119682	High	32.31	0.0549596	High	48.91	0.00128207	High	30.14	0.100507	0
	FPAPTPLLDLQNAPVSSLNNPSFISLYPNFK	4	1	1	Q9UT24		3401.77	0	5.615e-06				High	38.95	0.0147535	High	28.56	0.171846	High	35.3	0.0289661	High	23.09	0.53828	0
	SAADLIIELLK	4	1	1	Q9UT24		1185.71	0	2.261e-07				High	38.57	0.00348878	High	48.39	0.000362193	High	54.97	8.75654e-05	High	46.04	0.000684436	0
	KVTEIPTVHPR	2	1	1	Q9UT24		1276.74	0	0.003179				High	38.32	0.00220111				High	15.03	0.469506				1
	QIEEVLSTELPQDR	4	1	1	Q9UT24		1656.84	0	1.44e-06				High	38.3	0.0091261	High	25.79	0.185598	High	62.94	3.53425e-05				0
	EDLSFNLQNFK	3	1	1	Q9UT24		1354.66	0	1.731e-05				High	38.07	0.00711936	High	30.62	0.0396635	High	41.55	0.00326476				0
	TEHWWLVISDDK	3	1	1	Q9UT24		1528.74	0	0.002218				High	36.85	0.0130635				High	40.14	0.00601301	High	18.95	0.805491	0
	EKPNYGQSQYSYSAMSNLVTQADR	2	1	1	Q9UT24		2737.26	0	1.572e-06				High	36.63	0.0465284				High	15.23	6.59666				0
	DKALEEETIGHLLR	2	1	1	Q9UT24		1623.87	0	0.0001532				High	36.6	0.00998713				High	31.09	0.0366455				1
	IQTQVFNSVYK	2	1	1	Q9UT24	N7(Deamidated)	1327.69	0	0.0007049				High	36.45	0.00689584				High	19.01	0.384345				0
	ANDLSYVNLVR	3	1	1	Q9UT24		1263.67	0	4.149e-06				High	36.43	0.00720068	High	42.24	0.00187171	High	44.83	0.00113947				0
	INALLQSYISR	1	1	1	Q9UT24		1277.72	0	0.002144				High	36.4	0.00415792										0
	LLMQTTSFIELFR	3	1	1	Q9UT24	M3(Oxidation)	1614.85	0	0.002073				High	35.71	0.0145277				High	41.98	0.00384442				0
	TNDSVFIGAPNGSGK	3	1	1	Q9UT24		1463.71	0	0.0007093				High	35.48	0.0138172	High	19.76	0.53792	High	21.54	0.353533				0
	AEADSTSDENLKDLLPYGFAIHHAGMR	4	1	1	Q9UT24		2958.41	0	0.0004412				High	35.03	0.0744772				High	29.46	0.26753				1
	DLLPYGFAIHHAGMR	4	1	1	Q9UT24		1697.86	0	7.008e-05				High	32.41	0.0407049				High	34.43	0.0255109				0
	SPALYSVGPEYDDDKYLVQK	3	1	1	Q9UT24		2287.11	0	3.982e-10				High	32.39	0.083112				High	46.53	0.00328716	High	27.73	0.251465	1
	VFSFSDEFK	4	1	1	Q9UT24		1105.52	0	0.002005				High	32.07	0.0149319	High	35.55	0.00670062	High	44.92	0.000715077	High	38.85	0.00312108	0
	LSVEAHVQPITR	8	1	1	Q9UT24		1349.75	0	5.344e-05				High	31.22	0.0169518	High	26.87	0.0471827	High	39.1	0.0027558	High	29.5	0.0250771	0
	SFILLAAHFSR	4	1	1	Q9UT24		1261.71	0	3.271e-05				High	30.64	0.0239477	High	47.76	0.000407011	High	32.55	0.0132861	High	30.94	0.0192485	0
	VAASYYVTHNSMAIYNR	1	1	1	Q9UT24	N10(Deamidated)	1960.92	0	0.001044				High	30.25	0.102289										0
	MEFVPPAMGTLK	3	1	1	Q9UT24		1320.67	0	0.003103				High	28.55	0.0557849	High	12.62	2.19353	High	30.44	0.0368689				0
	YFDLDPAELGELVGVPK	2	1	1	Q9UT24		1861.95	0	3.749e-05				High	28.32	0.118521				High	25.57	0.215071				0
	NIENPDTEVTFISADTK	3	1	1	Q9UT24		1893.91	0	4.957e-12				High	27.41	0.168571	High	37.36	0.0175573	High	50.8	0.000778531				0
	LVIIDEVHLLHDER	5	1	1	Q9UT24		1700.93	0	6.323e-09				High	25.8	0.12257	High	25.63	0.133481	High	48.67	0.000662857	High	41.95	0.00317536	0
	KANDLSYVNLVR	4	1	1	Q9UT24		1391.76	0	0.003971				High	25.62	0.0715551				High	28.59	0.0360419	High	13.65	1.12626	1
	HQVDLENYVFTEGSR	4	1	1	Q9UT24		1793.85	0	1.38e-07				High	25.38	0.252793	High	23.44	0.380434	High	28.55	0.117295	High	17.57	1.483	0
	VAASYYVTHNSMAIYNR	1	1	1	Q9UT24	M12(Oxidation)	1975.93	0	0.0005885				High	25.03	0.353935										0
	SPALYSVGPEYDDDK	2	1	1	Q9UT24		1655.75	0	0.0006723				High	24.76	0.20553				High	11.11	4.92945				0
	LLHYEQFFLLK	3	1	1	Q9UT24		1450.81	0	0.001009				High	23.15	0.143315	High	24.64	0.0998036				High	13.49	1.30285	0
	FPAPTPLLDLQNAPVSSLNNPSFISLYPNFK	6	1	1	Q9UT24	N12(Deamidated)	3402.78	0	0.00214				High	22.44	0.572445				High	20.08	0.985675	High	12.79	5.60208	0
	HQEETLEQVR	7	1	1	Q9UT24		1268.62	0	0.002033				High	22.22	0.260009	High	18.26	0.664294	High	38.56	0.0057607	High	24.51	0.146555	0
	EIDAFWLQR	4	1	1	Q9UT24		1177.6	0	0.002086				High	21.67	0.213762	High	26.88	0.0596888	High	40.71	0.00268766	High	33.43	0.0141857	0
	VTEIPTVHPR	2	1	1	Q9UT24		1148.64	0	4.23e-08				High	20.1	0.226719				High	61.56	1.41741e-05				0
	QLAFDLVTFSMADEDEYLFSLMENEAFNKVEDAALQQSLK	1	1	1	Q9UT24		4600.17	0	0.001842				High	19.37	4.18166										1
	QDAVDWLTWSYMYR	3	1	1	Q9UT24		1833.83	0	0.006838				High	15.11	2.52051	High	31.05	0.0699645	High	14.85	2.72675				0
	QTSEDLFADGTIQVLVSTATLAWGVNLPAHTVIIK	5	1	1	Q9UT24		3708.99	0	4.446e-05				High	14.19	2.44073	High	12.08	3.47816	High	26.51	0.128989	High	33.64	0.0262968	0
	LLMQTTSFIELFR	3	1	1	Q9UT24		1598.86	0	9.931e-07							High	73.85	1.97601e-06	High	74.55	1.59241e-06	High	91.17	3.34942e-08	0
	AIFEISLR	2	1	1	Q9UT24		948.551	0	0.008146							High	35.7	0.00321638				High	36.3	0.00277791	0
	FSQLVNLGNR	3	1	1	Q9UT24		1147.62	0	0.001049							High	32.14	0.0212608	High	52.01	0.000219068	High	59.98	2.47135e-05	0
	AEPAPVSEIPLSK	3	1	1	Q9UT24		1337.73	0	0.001341							High	28.84	0.0382055	High	17.17	0.540105	High	20.29	0.273606	0
	SWILEALRPGAITIPDDGLNELNNNVVEK	2	1	1	Q9UT24	N20(Deamidated)	3191.66	0	0.008675							High	24.57	0.421063				High	33.03	0.0571153	0
	YIDYPISELLQMLGFTASIGSSELSQVILMTVTTK	1	1	1	Q9UT24		3849	0	0.0005682							High	11.74	7.85775							0
	QEFIGITEK	2	1	1	Q9UT24		1064.56	0	0.001354										High	51.37	0.000137867	High	29.27	0.0212947	0
	QIPYFDDALIER	1	1	1	Q9UT24		1479.75	0	4.35e-05										High	31.03	0.0461089				0
	VHNLLGACVDTLSSEGHLIACIRPMEMSQMVTQALWDR	2	1	1	Q9UT24		4225.05	0	0.002893										High	25.04	0.928236	High	15.98	7.78746	0
	QQISETQIIVTTPEK	2	1	1	Q9UT24		1714.92	0	0.0003254										High	18.93	0.683829	High	37.58	0.00963694	0
	LVIIDEVHLLHDERGPVLESIVAR	1	1	1	Q9UT24		2722.52	0	0.002087										High	18.91	0.328391				1
	TEHWWLVISDDKTLLAIK	1	1	1	Q9UT24		2168.17	0	0.001997										High	13.33	2.61754				1
	ELPEWSHQAFLNTQSLNR	1	1	1	Q9UT24	Q8(Deamidated)	2171.07	0	0.0006695													High	24.93	0.392709	0
	EKPNYGQSQYSYSAMSNLVTQADRR	1	1	1	Q9UT24		2893.36	0.001	0.01154				High	16.07	5.69114										1
	YFDSFEILK	2	1	1	Q9UT24		1161.58	0.001	0.008319				High	14	1.35755	High	22.47	0.154583							0
	YMAVQLEK	3	1	1	Q9UT24		981.507	0.001	0.003835				High	11.86	2.0624				High	27.18	0.0605862	High	24.64	0.108736	0
	AGRPQFDTYGEGIIITAHSELQYYLSLMNQQLPIESQFMR	1	1	1	Q9UT24	Q5(Deamidated)	4646.3	0.001	0.00655							High	32.02	0.144736							0
	DAEPTGEPESLVNR	1	1	1	Q9UT24		1513.72	0.001	0.01615							High	22.13	0.330057							0
	LSNPNYEDPHTK	2	1	1	Q9UT24		1414.66	0.001	0.007143							High	21.19	0.355453	High	13.24	2.18863				0
	STIVFTPDRK	1	1	1	Q9UT24		1163.64	0.001	0.008912										High	22.37	0.12197				1
	IVYIAPLK	2	1	1	Q9UT24		916.586	0.001	0.03125										High	21.66	0.0238819	High	12.17	0.212358	0
	FELPPGLVIDQK	1	1	1	Q9UT24		1355.76	0.001	0.01067										High	12.95	1.58688				0
	QLAFDLVTFSMADEDEYLFSLMENEAFNKVEDAALQQSLK	1	1	1	Q9UT24	N24(Deamidated)	4601.19	0.002	0.0346				High	32.1	0.220525										1
	KDAESLEIGIR	2	1	1	Q9UT24		1230.67	0.002	0.03504				High	25.35	0.102985				High	22.63	0.185831				1
	IKELPEWSHQAFLNTQSLNR	1	1	1	Q9UT24		2411.25	0.002	0.04086				High	18.77	1.44686										1
	YEEWYGK	4	1	1	Q9UT24		974.425	0.003	0.04925				High	23.23	0.0919774	High	25.88	0.0517743	High	14.43	0.690508	High	14.69	0.655477	0
	VPLSFQR	2	1	1	Q9UT24		846.483	0.003	0.05546				High	16.19	0.379889							High	15.85	0.410825	0
	WLHSITK	1	1	1	Q9UT24		884.499	0.003	0.02562										High	19.23	0.0829822				0
	LWPTMSPLR	1	1	1	Q9UT24		1100.59	0.004	0.05481							High	18.48	0.320707							0
	RVYNMVQSFPR	1	1	1	Q9UT24		1396.71	0.004	0.03639										High	19.93	0.504567				1
	DVIYSLK	1	1	1	Q9UT24		837.472	0.006	0.08062				High	22.63	0.0332912										0
	LIMPEK	1	1	1	Q9UT24		730.417	0.006	0.08664							High	17.03	0.48052							0
	RLVANPAYYGLQDITHESVSEFLSDLVETTMNDLSEAR	1	1	1	Q9UT24	N5(Deamidated); Q12(Deamidated)	4286.07	0.007	0.1008				High	39.7	0.0332492										1
	KYEDIVLER	1	1	1	Q9UT24		1164.63	0.007	0.09814				High	10.47	2.27049										1
	HLREDLSFNLQNFK	1	1	1	Q9UT24	Q11(Deamidated)	1761.88	0.007	0.06986										High	15.06	2.25652				1
P40372	60S ribosomal protein L3-A OS=Schizosaccharomyces pombe (strain 972 / ATCC 24843) GN=rpl3a PE=1 SV=2 - [RL3A_SCHPO]	46.65	1	1	20	162	50.0533	10.57	3	3	812.919	42.78	16	37	890.426	46.65	20	41	622.849	44.85	18	37	879.205	44.85	18	44	388	43.7753	10.272
	Sequence	# PSMs	# Proteins	# Protein Groups	Protein Group Accessions	Modifications	MH+ [Da]	q-Value	PEP	A2	IonScore A2	Exp Value A2	B2	IonScore B2	Exp Value B2	C2	IonScore C2	Exp Value C2	D2	IonScore D2	Exp Value D2	E2	IonScore E2	Exp Value E2	# Missed Cleavages
	YAESTQSINR	8	2	2	P40372;P36584		1168.56	0	3.978e-09	High	30.77	0.0308211	High	36.34	0.0091632	High	55.07	0.000114511	High	62.46	2.10843e-05	High	53.48	0.000165138	0
	DDASKPVHLTAFLGYK	9	2	2	P40372;P36584		1761.92	0	2.702e-07	High	28.26	0.100764	High	42.36	0.00369366	High	49.94	0.000722919	High	35.62	0.0194789	High	43.83	0.00294147	0
	SLTTVWAEHLSEEVK	7	2	2	P40372;P36584		1728.88	0	3.614e-05	High	23.69	0.352098	High	41.98	0.00489981	High	45.54	0.00214188	High	26.35	0.167895	High	48.08	0.00112419	0
	YGVVENDFVMLNGATPGPVK	13	2	2	P40372;P36584	N12(Deamidated)	2108.05	0	8.643e-07				High	81.68	7.72594e-07	High	52.2	0.000709514	High	35.73	0.031488	High	71.47	8.26553e-06	0
	STFEQNEMIDVIGVTR	8	2	2	P40372;P36584		1838.89	0	8.674e-07				High	76.45	2.1967e-06	High	62.04	5.97353e-05	High	72.02	6.06704e-06	High	52.44	0.000551919	0
	YGVVENDFVMLNGATPGPVK	6	2	2	P40372;P36584		2107.05	0	7.468e-07				High	60.96	9.27942e-05	High	26.99	0.221785	High	21.42	0.830355	High	38.35	0.015967	0
	AHLMEIQVNGGSVADKVEWAR	6	2	2	P40372;P36584		2310.16	0	2.889e-08				High	59.38	0.000151333				High	57.16	0.000246925	High	76.99	2.63182e-06	1
	HGSLGFLPR	4	2	2	P40372;P36584		983.542	0	8.706e-05				High	58.6	8.83446e-06	High	63.97	2.50542e-06	High	42.04	0.000390733	High	43.83	0.00025875	0
	STFEQNEMIDVIGVTR	1	2	2	P40372;P36584	N6(Deamidated)	1839.87	0	0.003154				High	58.28	0.000131802										0
	AHLMEIQVNGGSVADK	9	2	2	P40372;P36584	N9(Deamidated)	1669.82	0	2.831e-05				High	56.57	0.000159272	High	25.43	0.216389	High	35.17	0.0225482	High	29.25	0.0881274	0
	NASTDFDATEK	6	2	2	P40372;P36584		1198.52	0	9.312e-06				High	53.92	9.85386e-05	High	71.59	1.70929e-06	High	53.41	0.000110589	High	62.54	1.37068e-05	0
	SLTTVWAEHLSEEVKR	8	2	2	P40372;P36584		1884.98	0	0.0007478				High	48.74	0.00104321	High	54.69	0.000266606	High	51.55	0.000550076	High	49.21	0.000935609	1
	ALEPVSLK	4	2	2	P40372;P36584		856.514	0	0.004032				High	46.73	0.000179414	High	52.01	5.31933e-05	High	48.14	0.000129675	High	50.35	7.79573e-05	0
	EILEAVTVIETPPMVVVGVVGYVETPR	16	1	1	P40372		2896.57	0	8.837e-10				High	46.16	0.00127467	High	65.75	1.43945e-05	High	59.11	5.57871e-05	High	88.97	6.6425e-08	0
	AHLMEIQVNGGSVADKVEWAR	14	2	2	P40372;P36584	N9(Deamidated)	2311.15	0	2.11e-05				High	44.2	0.00511355	High	76.29	3.08389e-06	High	36.7	0.0279645	High	31.57	0.0942536	1
	KALEPVSLK	4	2	2	P40372;P36584		984.609	0	0.003308				High	37.88	0.00153968	High	55.01	2.82373e-05	High	48.53	0.000125552	High	47.13	0.00017331	1
	ITPMGGFVR	4	2	2	P40372;P36584		977.524	0	0.005202				High	37.05	0.00370815	High	33.58	0.00824438	High	18.29	0.283161	High	38.33	0.00276158	0
	NASTDFDATEKR	7	2	2	P40372;P36584		1354.62	0	0.0004971				High	34.35	0.0162155	High	46.54	0.000931642	High	28.52	0.0607413	High	39.22	0.00516992	1
	KAHLMEIQVNGGSVADK	2	2	2	P40372;P36584		1796.93	0	0.001089				High	27.09	0.1284	High	17.22	1.24614							1
	AHLMEIQVNGGSVADK	4	2	2	P40372;P36584		1668.84	0	0.0001411				High	25.79	0.191134	High	32.3	0.043545	High	28.93	0.0878295	High	28.9	0.0942355	0
	YGVVENDFVMLNGATPGPVK	1	2	2	P40372;P36584	N6(Deamidated); N12(Deamidated)	2109.02	0	9.932e-06							High	67.36	2.27823e-05							0
	NASTDFDATEK	2	2	2	P40372;P36584	N1(Deamidated)	1199.51	0	8.151e-05							High	44.66	0.000702768	High	13.41	0.914354				0
	STFEQNEMIDVIGVTR	2	2	2	P40372;P36584	M8(Oxidation)	1854.89	0	1.982e-05							High	33.05	0.0433023				High	54.44	0.000321256	0
	ITPMGGFVR	3	2	2	P40372;P36584	M4(Oxidation)	993.519	0	0.003025							High	19.87	0.215866				High	35.43	0.0058286	0
	KAHLMEIQVNGGSVADK	4	2	2	P40372;P36584	N10(Deamidated)	1797.92	0	8.749e-05										High	12.65	4.13957	High	37.48	0.0134076	1
	KYAESTQSINR	4	2	2	P40372;P36584		1296.66	0.001	0.02204							High	34.45	0.0147696	High	10.5	3.41349	High	35.69	0.0103323	1
	KAHLMEIQVNGGSVADKVEWAR	1	2	2	P40372;P36584		2438.27	0.001	0.01072							High	24.29	0.37444							2
	WIDTASK	3	2	2	P40372;P36584		820.42	0.001	0.0201							High	23.32	0.110111	High	20.09	0.231649	High	23.48	0.106128	0
	YGVVENDFVMLNGATPGPVK	1	2	2	P40372;P36584	M10(Oxidation); N12(Deamidated)	2124.03	0.001	0.009107							High	13.02	6.05147							0
	QFLGTLK	1	2	2	P40372;P36584		806.477	0.008	0.1141							High	20.5	0.0926901							0
Q96WV5	Putative coatomer subunit alpha OS=Schizosaccharomyces pombe (strain 972 / ATCC 24843) GN=SPBPJ4664.04 PE=1 SV=1 - [COPA_SCHPO]	50.29	1	47	47	177	74.36	7.62	5	8	667.163	34.47	28	33	877.243	44.82	38	48	571.184	32.48	29	39	891.307	43.91	41	49	1207	136.283	6.15088
	Sequence	# PSMs	# Proteins	# Protein Groups	Protein Group Accessions	Modifications	MH+ [Da]	q-Value	PEP	A2	IonScore A2	Exp Value A2	B2	IonScore B2	Exp Value B2	C2	IonScore C2	Exp Value C2	D2	IonScore D2	Exp Value D2	E2	IonScore E2	Exp Value E2	# Missed Cleavages
	VYLPTISGLDPLVSYVR	7	1	1	Q96WV5		1892.05	0	1.626e-06	High	32.04	0.0241942	High	47.49	0.000618485	High	64.68	1.3327e-05	High	44.43	0.00123678	High	42.05	0.00227663	0
	LNLFAAAHDSGVMVFK	6	1	1	Q96WV5		1719.89	0	1.883e-05	High	32.02	0.0428022	High	29.72	0.0678355	High	46.8	0.00134655	High	29.14	0.0775277	High	34.33	0.0242603	0
	KDYEQVLHLIQNSNLVGQAIIAYLQK	7	1	1	Q96WV5	N14(Deamidated)	2999.64	0	2.984e-07	High	27.37	0.076774				High	27.79	0.0720258	High	28.91	0.0568097				1
	LLQLAESGPAAEAANR	5	1	1	Q96WV5		1610.85	0	0.0002046	High	23	0.247336	High	43.62	0.0020813	High	17.8	0.821496	High	21.53	0.303024	High	28.94	0.0620349	0
	KDYEQVLHLIQNSNLVGQAIIAYLQK	7	1	1	Q96WV5		2998.64	0	0.0003422	High	20.73	0.357976	High	42.49	0.00226301	High	40.78	0.00342597	High	38.54	0.00617218	High	24.39	0.146294	1
	NPHDAFEIEYDPHVEMR	4	1	1	Q96WV5		2098.93	0	0.0003864	High	16.46	2.57124				High	36.69	0.0249325				High	36.86	0.0238621	0
	ALELSYYFASADLQPMHSIIALR	4	1	1	Q96WV5		2609.35	0	7.83e-08				High	75.43	3.40694e-06	High	71.62	8.40156e-06	High	54.93	0.000385318	High	71.86	7.61102e-06	0
	QVGAINFSPLK	4	1	1	Q96WV5		1173.66	0	5.065e-05				High	57.66	6.59017e-05	High	43.2	0.00179247	High	45.62	0.00105276	High	41.95	0.00239349	0
	GVAFHPTQPWILTSLHNGR	4	1	1	Q96WV5	N17(Deamidated)	2132.1	0	3.707e-06				High	56.07	0.000230612	High	37.59	0.0162511	High	37.48	0.0172932	High	41.88	0.00612635	0
	GPGDDAIFVAR	4	1	1	Q96WV5		1117.56	0	0.0001743				High	55.16	8.96081e-05	High	58.14	4.14347e-05	High	49.85	0.000286217	High	32.87	0.0144338	0
	FLEIYTASR	4	1	1	Q96WV5		1099.58	0	0.001162				High	51.53	0.000153621	High	39.05	0.00270682	High	34.89	0.00708682	High	53.54	9.67056e-05	0
	DIFFAGMGHVLLSTATQVHLFDLQQK	8	1	1	Q96WV5		2916.5	0	4.689e-10				High	49.7	0.0013394	High	44.82	0.00441842	High	49.52	0.00146142	High	55.84	0.000361083	0
	INILEQAGMYPIAYLTAK	9	1	1	Q96WV5		2009.07	0	0.0001415				High	48.19	0.000878372	High	40.69	0.00502049	High	22.54	0.328182	High	58.56	8.83958e-05	0
	ERPAHALNINTLLYVNK	4	1	1	Q96WV5		1966.08	0	0.0002151				High	47.8	0.000645579	High	33.17	0.0188924	High	31.05	0.031645	High	34.89	0.0130547	0
	LSFLYLITGNAEK	4	1	1	Q96WV5		1468.81	0	1.547e-06				High	44.73	0.00101458	High	63.1	1.46689e-05	High	56.49	6.1258e-05	High	28.69	0.0404946	0
	IAEITFQK	4	1	1	Q96WV5		949.536	0	0.002395				High	43.56	0.000607966	High	36.7	0.00295039	High	36.67	0.00308924	High	35.55	0.00384485	0
	AAEPVSFEIDPTEYLFK	2	1	1	Q96WV5		1955.96	0	4.212e-05				High	39.52	0.0119504							High	39.58	0.0116983	0
	LASDAMSYGNHK	3	1	1	Q96WV5		1293.59	0	9.563e-05				High	37.39	0.0049154	High	33.33	0.0129368				High	33.76	0.0124114	0
	VALLTSSADNGVYELVNVSSR	3	1	1	Q96WV5		2194.14	0	5.774e-07				High	35.96	0.0247555	High	62.13	5.9153e-05	High	16.46	2.15889				0
	NLELITSIHETIR	4	1	1	Q96WV5		1538.85	0	3.81e-05				High	35.2	0.00688549	High	27.9	0.0408696	High	35.45	0.00718457	High	51.48	0.000179226	0
	SAVWVENNVLLYATLDHLK	4	1	1	Q96WV5		2185.17	0	6.466e-05				High	32.8	0.0385996	High	36.78	0.0152593	High	35.19	0.0220057	High	43.87	0.00295962	0
	GIAFHPTQPLFVSGGDDYK	4	1	1	Q96WV5		2049.01	0	0.002538				High	27.82	0.191297	High	21.84	0.732865	High	17.66	2.06532	High	26.46	0.272827	0
	YVVWSNDNSQAALLGK	4	1	1	Q96WV5		1764.9	0	1.548e-07				High	27.13	0.151041	High	65.61	2.09664e-05	High	42.62	0.00444724	High	39.4	0.00906467	0
	DYEQVLHLIQNSNLVGQAIIAYLQK	4	1	1	Q96WV5		2870.53	0	6.997e-08				High	21.1	0.455657	High	55.31	0.000212293	High	46.74	0.00133563	High	21.9	0.46132	0
	NAAPVSMSLEDQLAQAHNSISNDLFGSTDAIVK	2	1	1	Q96WV5	Q15(Deamidated)	3444.67	0	0.002058				High	20.62	2.21509										0
	VALLTSSADNGVYELVNVSSR	3	1	1	Q96WV5	N10(Deamidated)	2195.12	0	1.85e-09							High	88.16	1.62686e-07	High	51.57	0.000758626	High	81.16	8.19571e-07	0
	RNDTLSLFQNSLYLNEVESR	2	1	1	Q96WV5		2398.2	0	1.701e-05							High	48.5	0.00191964				High	48.11	0.0020745	1
	NDTLSLFQNSLYLNEVESR	4	1	1	Q96WV5		2242.1	0	1.139e-06							High	48.09	0.00213143	High	22.68	0.752078	High	62.39	7.9911e-05	0
	NSPLAADHIAAGDFESAMK	1	1	1	Q96WV5		1944.91	0	0.0002232							High	33.5	0.0458297							0
	IVSSFNANR	2	1	1	Q96WV5		1007.53	0	0.001266							High	33.12	0.00828798				High	43.11	0.000830709	0
	NAAPVSMSLEDQLAQAHNSISNDLFGSTDAIVK	2	1	1	Q96WV5		3443.69	0	0.0004065							High	27.61	0.417933				High	25.41	0.718199	0
	TLESTLYLVK	2	1	1	Q96WV5		1166.67	0	0.002772							High	22.15	0.071011				High	25.75	0.0320617	0
	GVAFHPTQPWILTSLHNGR	3	1	1	Q96WV5		2131.12	0	1.377e-07							High	21.97	0.514618	High	21.24	0.619337	High	32.23	0.050117	0
	LSFLYLITGNAEK	2	1	1	Q96WV5	N10(Deamidated)	1469.79	0	0.001565							High	21.7	0.224798				High	28.85	0.0492597	0
	DIFFAGMGHVLLSTATQVHLFDLQQK	4	1	1	Q96WV5	Q17(Deamidated)	2917.51	0	1.553e-06							High	21.31	0.912673	High	33.77	0.0513575	High	32.13	0.0756559	0
	SLSYNPAEK	2	1	1	Q96WV5		1008.5	0	0.005415							High	18.4	0.296315				High	23.42	0.0909976	0
	LPSLGSAFTTPVPVNETYTHNWPLLDTSHSTFEK	1	1	1	Q96WV5		3786.88	0	0.001605							High	16.3	5.44564							0
	GYPEIALQFVEDPSTR	1	1	1	Q96WV5		1821.9	0	4.518e-05													High	25.93	0.238039	0
	IQLWDYR	4	1	1	Q96WV5		993.515	0.001	0.006351				High	36.63	0.00382395	High	36.53	0.00361288	High	38.41	0.00234344	High	22.82	0.0848894	0
	SIVSYDLLR	2	1	1	Q96WV5		1065.59	0.001	0.02389				High	32.28	0.00961288	High	32.02	0.0102688							0
	HYVYIVK	4	1	1	Q96WV5		921.52	0.001	0.003364				High	27.73	0.0215036	High	29.54	0.0141746	High	27.38	0.0233083	High	24.87	0.0415442	0
	MGTLLDR	4	1	1	Q96WV5		805.423	0.001	0.0259				High	26.7	0.0332453	High	22.31	0.0913546	High	25.07	0.0588114	High	21.59	0.107828	0
	MEQLAIER	1	1	1	Q96WV5		989.509	0.001	0.01518							High	26.24	0.0562123							0
	MAIIAEK	3	1	1	Q96WV5		775.438	0.001	0.009792							High	24.5	0.0626246	High	19.39	0.203692	High	33.58	0.00776199	0
	FWFITVHPK	3	1	1	Q96WV5		1174.64	0.001	0.01678							High	11.54	2.34286				High	25.6	0.117743	0
	TAVQTFR	1	1	1	Q96WV5		822.447	0.001	0.01018													High	34.92	0.00431623	0
	TIQLPEK	2	1	1	Q96WV5		828.483	0.002	0.04783										High	16.27	0.252571	High	27.9	0.0172723	0
	FAVFSR	4	1	1	Q96WV5		726.393	0.004	0.08248				High	30.42	0.0075803	High	28.2	0.0126382	High	32.01	0.00525638	High	30.46	0.0075108	0
	KIVSSFNANR	1	1	1	Q96WV5		1135.62	0.005	0.09461													High	17.98	0.336752	1
	GIAFHPTQPLFVSGGDDYKVNVWNYK	1	1	1	Q96WV5		2952.47	0.006	0.1151													High	14.47	6.68279	1
	IWNWQSR	1	1	1	Q96WV5		989.495	0.007	0.0643										High	18.66	0.543216				0
	DNDRFWFITVHPK	1	1	1	Q96WV5		1674.84	0.008	0.1382													High	12.76	4.09165	1
	VNVWNYK	1	1	1	Q96WV5		922.478	0.009	0.1045										High	15.02	0.45485				0
P36584	60S ribosomal protein L3-B OS=Schizosaccharomyces pombe (strain 972 / ATCC 24843) GN=rpl3b PE=3 SV=2 - [RL3B_SCHPO]	46.65	1	1	20	159	50.0533	10.57	3	3	834.929	42.78	16	37	853.146	46.65	20	39	563.48	44.85	18	35	834.65	44.85	18	45	388	43.7893	10.272
	Sequence	# PSMs	# Proteins	# Protein Groups	Protein Group Accessions	Modifications	MH+ [Da]	q-Value	PEP	A2	IonScore A2	Exp Value A2	B2	IonScore B2	Exp Value B2	C2	IonScore C2	Exp Value C2	D2	IonScore D2	Exp Value D2	E2	IonScore E2	Exp Value E2	# Missed Cleavages
	YAESTQSINR	8	2	2	P40372;P36584		1168.56	0	3.978e-09	High	30.77	0.0308211	High	36.34	0.0091632	High	55.07	0.000114511	High	62.46	2.10843e-05	High	53.48	0.000165138	0
	DDASKPVHLTAFLGYK	9	2	2	P40372;P36584		1761.92	0	2.702e-07	High	28.26	0.100764	High	42.36	0.00369366	High	49.94	0.000722919	High	35.62	0.0194789	High	43.83	0.00294147	0
	SLTTVWAEHLSEEVK	7	2	2	P40372;P36584		1728.88	0	3.614e-05	High	23.69	0.352098	High	41.98	0.00489981	High	45.54	0.00214188	High	26.35	0.167895	High	48.08	0.00112419	0
	YGVVENDFVMLNGATPGPVK	13	2	2	P40372;P36584	N12(Deamidated)	2108.05	0	8.643e-07				High	81.68	7.72594e-07	High	52.2	0.000709514	High	35.73	0.031488	High	71.47	8.26553e-06	0
	STFEQNEMIDVIGVTR	8	2	2	P40372;P36584		1838.89	0	8.674e-07				High	76.45	2.1967e-06	High	62.04	5.97353e-05	High	72.02	6.06704e-06	High	52.44	0.000551919	0
	EILEAVTIIETPPMVVVGVVGYVETPR	13	1	1	P36584		2910.59	0	2.082e-10				High	62.19	2.85668e-05	High	64.25	1.71382e-05	High	29.5	0.0518934	High	69.75	4.8302e-06	0
	YGVVENDFVMLNGATPGPVK	6	2	2	P40372;P36584		2107.05	0	7.468e-07				High	60.96	9.27942e-05	High	26.99	0.221785	High	21.42	0.830355	High	38.35	0.015967	0
	AHLMEIQVNGGSVADKVEWAR	6	2	2	P40372;P36584		2310.16	0	2.889e-08				High	59.38	0.000151333				High	57.16	0.000246925	High	76.99	2.63182e-06	1
	HGSLGFLPR	4	2	2	P40372;P36584		983.542	0	8.706e-05				High	58.6	8.83446e-06	High	63.97	2.50542e-06	High	42.04	0.000390733	High	43.83	0.00025875	0
	STFEQNEMIDVIGVTR	1	2	2	P40372;P36584	N6(Deamidated)	1839.87	0	0.003154				High	58.28	0.000131802										0
	AHLMEIQVNGGSVADK	9	2	2	P40372;P36584	N9(Deamidated)	1669.82	0	2.831e-05				High	56.57	0.000159272	High	25.43	0.216389	High	35.17	0.0225482	High	29.25	0.0881274	0
	NASTDFDATEK	6	2	2	P40372;P36584		1198.52	0	9.312e-06				High	53.92	9.85386e-05	High	71.59	1.70929e-06	High	53.41	0.000110589	High	62.54	1.37068e-05	0
	SLTTVWAEHLSEEVKR	8	2	2	P40372;P36584		1884.98	0	0.0007478				High	48.74	0.00104321	High	54.69	0.000266606	High	51.55	0.000550076	High	49.21	0.000935609	1
	ALEPVSLK	4	2	2	P40372;P36584		856.514	0	0.004032				High	46.73	0.000179414	High	52.01	5.31933e-05	High	48.14	0.000129675	High	50.35	7.79573e-05	0
	AHLMEIQVNGGSVADKVEWAR	14	2	2	P40372;P36584	N9(Deamidated)	2311.15	0	2.11e-05				High	44.2	0.00511355	High	76.29	3.08389e-06	High	36.7	0.0279645	High	31.57	0.0942536	1
	KALEPVSLK	4	2	2	P40372;P36584		984.609	0	0.003308				High	37.88	0.00153968	High	55.01	2.82373e-05	High	48.53	0.000125552	High	47.13	0.00017331	1
	ITPMGGFVR	4	2	2	P40372;P36584		977.524	0	0.005202				High	37.05	0.00370815	High	33.58	0.00824438	High	18.29	0.283161	High	38.33	0.00276158	0
	NASTDFDATEKR	7	2	2	P40372;P36584		1354.62	0	0.0004971				High	34.35	0.0162155	High	46.54	0.000931642	High	28.52	0.0607413	High	39.22	0.00516992	1
	KAHLMEIQVNGGSVADK	2	2	2	P40372;P36584		1796.93	0	0.001089				High	27.09	0.1284	High	17.22	1.24614							1
	AHLMEIQVNGGSVADK	4	2	2	P40372;P36584		1668.84	0	0.0001411				High	25.79	0.191134	High	32.3	0.043545	High	28.93	0.0878295	High	28.9	0.0942355	0
	YGVVENDFVMLNGATPGPVK	1	2	2	P40372;P36584	N6(Deamidated); N12(Deamidated)	2109.02	0	9.932e-06							High	67.36	2.27823e-05							0
	NASTDFDATEK	2	2	2	P40372;P36584	N1(Deamidated)	1199.51	0	8.151e-05							High	44.66	0.000702768	High	13.41	0.914354				0
	STFEQNEMIDVIGVTR	2	2	2	P40372;P36584	M8(Oxidation)	1854.89	0	1.982e-05							High	33.05	0.0433023				High	54.44	0.000321256	0
	ITPMGGFVR	3	2	2	P40372;P36584	M4(Oxidation)	993.519	0	0.003025							High	19.87	0.215866				High	35.43	0.0058286	0
	KAHLMEIQVNGGSVADK	4	2	2	P40372;P36584	N10(Deamidated)	1797.92	0	8.749e-05										High	12.65	4.13957	High	37.48	0.0134076	1
	KYAESTQSINR	4	2	2	P40372;P36584		1296.66	0.001	0.02204							High	34.45	0.0147696	High	10.5	3.41349	High	35.69	0.0103323	1
	KAHLMEIQVNGGSVADKVEWAR	1	2	2	P40372;P36584		2438.27	0.001	0.01072							High	24.29	0.37444							2
	WIDTASK	3	2	2	P40372;P36584		820.42	0.001	0.0201							High	23.32	0.110111	High	20.09	0.231649	High	23.48	0.106128	0
	YGVVENDFVMLNGATPGPVK	1	2	2	P40372;P36584	M10(Oxidation); N12(Deamidated)	2124.03	0.001	0.009107							High	13.02	6.05147							0
	QFLGTLK	1	2	2	P40372;P36584		806.477	0.008	0.1141							High	20.5	0.0926901							0
P09627	Plasma membrane ATPase 1 OS=Schizosaccharomyces pombe (strain 972 / ATCC 24843) GN=pma1 PE=1 SV=1 - [PMA1_SCHPO]	46.03	2	32	32	161	121.5	12.3	8	9	926.061	39.39	29	48	844.143	43.85	31	45	454.117	31.66	21	25	641.327	35.58	25	34	919	99.8204	5.18604
	Sequence	# PSMs	# Proteins	# Protein Groups	Protein Group Accessions	Modifications	MH+ [Da]	q-Value	PEP	A2	IonScore A2	Exp Value A2	B2	IonScore B2	Exp Value B2	C2	IonScore C2	Exp Value C2	D2	IonScore D2	Exp Value D2	E2	IonScore E2	Exp Value E2	# Missed Cleavages
	ADTGIAVEGATDAAR	7	1	1	P09627		1417.69	0	1.062e-08	High	51.27	0.000418011	High	59.5	6.35062e-05	High	71.21	4.4691e-06	High	73.87	2.29714e-06	High	58.01	8.75221e-05	0
	SIEDLVVALQR	9	1	1	P09627		1242.71	0	1.012e-05	High	50.35	0.000241252	High	60.26	2.40653e-05	High	72.22	1.58345e-06	High	42.14	0.00161289	High	57.7	4.33901e-05	0
	VIEFQPFDPVSK	4	1	1	P09627		1405.74	0	0.0002417	High	35.35	0.0134493	High	35.61	0.0126128	High	36.11	0.012331				High	23.34	0.212722	0
	ADNAGEYHDAEK	10	1	1	P09627	N-Term(Acetyl)	1361.56	0	2.141e-07	High	33.99	0.0100754	High	30.9	0.0204427	High	24.76	0.0848855	High	31.05	0.0198272	High	47.7	0.000431354	0
	KADTGIAVEGATDAAR	7	1	1	P09627		1545.79	0	3.674e-05	High	21.35	0.455817	High	56.09	0.000144055	High	50.1	0.000617125	High	53.98	0.000252565	High	48.85	0.000809267	1
	EGQVHELEANEVVPGDILK	8	1	1	P09627		2076.06	0	2.809e-08	High	19.39	1.06334	High	27	0.183764	High	35.81	0.0241428	High	54.98	0.000297355	High	34.46	0.0330881	0
	VVTPDVHLQVDQSAITGESLAVDK	5	1	1	P09627		2521.32	0	1.467e-09	High	17.8	1.79235	High	70.45	9.74598e-06	High	32.16	0.0663171	High	23.99	0.431745	High	65.63	2.95956e-05	0
	RGEGLMVVTATGDSTFVGR	5	1	1	P09627		1952.99	0	8.358e-11	High	15.95	2.54733	High	56.79	0.000209725	High	50.47	0.000896083	High	64	3.80192e-05	High	52.87	0.000492661	1
	GYLVAMTGDGVNDAPSLK	6	2	1	P09627		1807.89	0	6.098e-08				High	75.66	2.3633e-06	High	61.37	6.31345e-05	High	30.69	0.0739211	High	39.6	0.00939134	0
	VTAYVQAPDGTR	4	1	1	P09627		1277.65	0	7.743e-05				High	71.96	2.31794e-06	High	56.59	7.97085e-05	High	42.48	0.00175413	High	61.71	2.32038e-05	0
	YAVVDILQQR	4	2	1	P09627		1204.67	0	0.0001874				High	69.68	2.66963e-06	High	69.54	2.75709e-06	High	51.82	0.000163099	High	69.85	2.56715e-06	0
	QLGMGTNIYNAER	4	1	1	P09627		1466.71	0	1.073e-05				High	57.88	8.99371e-05	High	37.12	0.0121402	High	55.52	0.000174638	High	61.14	4.78784e-05	0
	MLTGDAVDIAK	3	1	1	P09627		1133.59	0	0.0002591				High	52.05	0.000171839	High	60.14	2.67245e-05				High	54.44	9.91109e-05	0
	AVPEELLQTDMNTGLTMSEVEER	5	1	1	P09627		2592.21	0	1.395e-05				High	47.58	0.00337118	High	41.22	0.0147734	High	23.53	0.86792	High	24.48	0.697397	0
	EELENPFLK	4	1	1	P09627		1118.57	0	0.003275				High	44.56	0.000944852	High	36.81	0.00562813	High	20.2	0.354302	High	20.55	0.337882	0
	SAADIVFLAPGLSAIIDALK	5	2	1	P09627		1985.13	0	2.913e-06				High	43.34	0.0012235				High	28.74	0.0355534	High	14.47	0.955705	0
	LGLTGGGNMPGSEVYDFVEAADGFGEVFPQHK	2	1	1	P09627	N8(Deamidated)	3326.53	0	1.637e-06				High	42.71	0.0157524				High	29.96	0.300656				0
	HYGDPTFASSGVK	7	1	1	P09627		1365.64	0	1.961e-06				High	42.06	0.00220605	High	30.17	0.0368778	High	18.93	0.479768	High	47.14	0.000739944	0
	GEGLMVVTATGDSTFVGR	4	1	1	P09627		1796.88	0	2.447e-05				High	38.48	0.0122465	High	31.71	0.0582118	High	20.39	0.805791	High	24.97	0.268587	0
	KVTAYVQAPDGTR	5	1	1	P09627		1405.74	0	0.001233				High	33.69	0.0186845	High	46.76	0.000830799				High	50.83	0.000313481	1
	RGEGLMVVTATGDSTFVGR	3	1	1	P09627	M6(Oxidation)	1968.98	0	1.755e-05				High	33.28	0.0468015	High	33.47	0.0458551				High	18.89	1.28605	1
	GYLVAMTGDGVNDAPSLK	3	2	1	P09627	N12(Deamidated)	1808.87	0	7.837e-06				High	32.06	0.0576561	High	70.54	8.13317e-06				High	19.44	1.04093	0
	TVEEDHPIPEDVLSAYK	6	1	1	P09627		1941.94	0	0.002067				High	31.58	0.070823	High	18.66	1.44722	High	21.29	0.789829	High	19.07	1.2933	0
	GYLVAMTGDGVNDAPSLK	1	2	1	P09627	M6(Oxidation)	1823.88	0	0.002092				High	30.09	0.0900641										0
	QLGMGTNIYNAER	5	1	1	P09627	N10(Deamidated)	1467.69	0	0.004958				High	29.4	0.0691188	High	29.21	0.0708304				High	18.5	0.878598	0
	GYLVAMTGDGVNDAPSLKK	2	2	1	P09627		1935.98	0	0.00037				High	27.57	0.158886	High	25.14	0.269912							1
	GGHQTSIVAVLR	3	2	1	P09627		1237.7	0	0.003349				High	27.33	0.0314376	High	23.65	0.0733582				High	20.48	0.152212	0
	LLEYTLAITIIGVPVGLPAVVTTTMAVGAAYLAEK	2	1	1	P09627		3559.01	0	2.778e-05				High	23.77	0.068001	High	37.26	0.00334518							0
	YGLNQMKEELENPFLK	2	1	1	P09627		1952.98	0	0.001245				High	15.99	2.51012	High	17.57	1.68073							1
	LWGLSTVIGIVLAIGTWITNTTMIAQGQNR	1	1	1	P09627		3227.76	0	5.395e-09							High	75.66	1.09744e-06							0
	TVEEDHPIPEDVLSAYKDK	1	1	1	P09627		2185.07	0	0.003783							High	22.11	0.792348							1
	LGLTGGGNMPGSEVYDFVEAADGFGEVFPQHK	2	1	1	P09627		3325.54	0	8.101e-05							High	21.15	2.2265				High	11.46	20.7311	0
	GIVQNFGVQDEVLFLEISLTENWLIFVTR	1	1	1	P09627		3379.79	0	0.0003501							High	16.24	2.00843							0
	VVTPDVHLQVDQSAITGESLAVDKHYGDPTFASSGVK	1	1	1	P09627		3867.94	0	8.259e-05							High	15.77	5.42943							1
	AVPEELLQTDMNTGLTMSEVEER	2	1	1	P09627	Q8(Deamidated)	2593.21	0	2.8e-05										High	55.73	0.000506134	High	59.16	0.000230362	0
	VVTPDVHLQVDQSAITGESLAVDK	1	1	1	P09627	Q12(Deamidated)	2522.32	0	1.686e-05													High	40.44	0.00952898	0
	MYSYVVYR	4	1	1	P09627		1080.52	0.001	0.02501				High	29.86	0.0221011	High	28.9	0.0285347	High	28.51	0.0305111	High	22.98	0.109008	0
	GAPLWVLK	4	1	1	P09627		883.54	0.001	0.01431				High	20.73	0.0507167	High	21.51	0.0423791	High	19.49	0.0674763	High	20.16	0.0578297	0
	VVTPDVHLQVDQSAITGESLAVDKHYGDPTFASSGVK	2	1	1	P09627	Q12(Deamidated)	3868.93	0.001	0.01114				High	16.08	5.42035										1
	GEGLMVVTATGDSTFVGR	1	1	1	P09627	M5(Oxidation)	1812.88	0.001	0.01358							High	21.24	0.648275							0
	AVPEELLQTDMNTGLTMSEVEER	1	1	1	P09627	M11(Oxidation)	2608.21	0.001	0.009806							High	13.69	8.24983							0
	YGLNQMK	4	2	1	P09627		853.424	0.003	0.06406				High	21.37	0.206436	High	22.2	0.0789353	High	21.4	0.0949011	High	28.58	0.0181665	0
	MYSYVVYR	1	1	1	P09627	M1(Oxidation)	1096.51	0.006	0.1038													High	13.49	1.23793	0
Q10208	Pyruvate kinase OS=Schizosaccharomyces pombe (strain 972 / ATCC 24843) GN=pyk1 PE=1 SV=1 - [KPYK_SCHPO]	59.72	1	23	23	119	114.37	14.73	5	5	678.261	55.8	20	32	839.401	59.53	21	34	377.675	39.88	15	18	527.255	55.99	21	30	509	55.4795	7.95752
	Sequence	# PSMs	# Proteins	# Protein Groups	Protein Group Accessions	Modifications	MH+ [Da]	q-Value	PEP	A2	IonScore A2	Exp Value A2	B2	IonScore B2	Exp Value B2	C2	IonScore C2	Exp Value C2	D2	IonScore D2	Exp Value D2	E2	IonScore E2	Exp Value E2	# Missed Cleavages
	MNFSHGSYEYHQSVIDNAR	6	1	1	Q10208		2254.99	0	6.991e-10	High	76.21	3.09097e-06	High	18.78	1.71436	High	92.57	7.07458e-08	High	67.72	2.16123e-05	High	30.3	0.119317	0
	GSYPVEAVTYMAETAR	8	1	1	Q10208		1744.82	0	9.065e-05	High	35.32	0.0248672	High	48.28	0.00129945	High	51.23	0.000669356	High	49.12	0.00106787	High	50.99	0.000707388	0
	GVYPVIYEK	5	1	1	Q10208		1067.58	0	0.002917	High	30.88	0.0134736	High	30.14	0.0213505	High	34.53	0.00704742	High	29.26	0.0261462	High	29.96	0.022254	0
	KASATNPLFPLAIALDTK	3	1	1	Q10208		1871.07	0	0.0003323	High	24.78	0.0898181							High	34.94	0.00918596	High	39.32	0.0031635	1
	AIVVLSTSGNTAR	5	1	1	Q10208		1288.72	0	1.669e-05	High	22.38	0.178054	High	61.52	2.18807e-05	High	61.67	2.11379e-05	High	65.7	8.35722e-06	High	36.55	0.00687166	0
	VAEASIPYGSLYQEMFGLVR	7	1	1	Q10208		2230.12	0	9.715e-08				High	78.48	1.71351e-06	High	56.36	0.000264963	High	59.07	0.000146488	High	67	2.38833e-05	0
	QWVAGLNSELDIPAVNR	3	1	1	Q10208		1881.98	0	4.445e-08				High	78.08	1.06973e-06	High	73.89	2.93786e-06				High	85.01	2.22428e-07	0
	NGVDMIFASFIR	4	1	1	Q10208		1369.69	0	4.085e-06				High	66.6	1.02168e-05	High	60.84	3.824e-05	High	33.79	0.0198261	High	75.47	1.39342e-06	0
	NGVDMIFASFIR	8	1	1	Q10208	N1(Deamidated)	1370.68	0	5.068e-06				High	65.23	1.54307e-05	High	53.25	0.000235866	High	33.69	0.021143	High	38.52	0.00705133	0
	AEVSDVGNAVLDGADLVMLSGETTK	6	1	1	Q10208		2491.22	0	7.129e-07				High	55.72	0.00041219	High	60.4	0.000142456				High	59.35	0.000180257	0
	IIVLQGAVGGK	4	1	1	Q10208		1054.66	0	0.0009814				High	48.3	6.87785e-05	High	46.17	0.000112319	High	48.12	7.16891e-05	High	30.59	0.00405932	0
	IENQQGVNNFDSILDVTDGIMVAR	7	1	1	Q10208		2648.3	0	3.523e-08				High	46.74	0.00358003	High	78.21	2.57771e-06	High	28.35	0.242648	High	55.34	0.000497545	0
	ASATNPLFPLAIALDTK	6	1	1	Q10208		1742.97	0	1.319e-05				High	39.14	0.00524166	High	53.32	0.000197874	High	45.41	0.00114377	High	46.27	0.000996122	0
	FGVKNGVDMIFASFIR	5	1	1	Q10208	N5(Deamidated)	1801.93	0	0.0005575				High	37.91	0.0125239	High	29.74	0.0790963				High	33.7	0.0319081	1
	IIYVDDGILSFTVIEK	6	1	1	Q10208		1825	0	5.158e-06				High	36.09	0.00914027	High	49.01	0.000532557	High	14.77	1.27369	High	45.24	0.00131211	0
	NGVDMIFASFIR	2	1	1	Q10208	N1(Deamidated); M5(Oxidation)	1386.67	0	0.0009553				High	35.55	0.0152401	High	30.67	0.0483798							0
	MNFSHGSYEYHQSVIDNAR	3	1	1	Q10208	M1(Oxidation)	2270.99	0	2.41e-05				High	33.73	0.0556455	High	20.04	1.28412	High	33.67	0.0561189				0
	TGLTVGGTDYPISSGHEMIFTTDDAYAEK	3	1	1	Q10208		3076.41	0	0.001181				High	27.79	0.444381	High	22.51	1.50726				High	11.64	18.4362	0
	GVYPVIYEKEPLSDWQK	2	1	1	Q10208		2051.05	0	0.005023				High	25.47	0.270454							High	16.34	2.13808	1
	DAGMNIVR	4	1	1	Q10208		875.44	0	0.00102				High	24.52	0.0522711	High	23.32	0.0689067	High	35.19	0.00447983	High	20.28	0.138759	0
	YRPSIPIVMVTR	6	1	1	Q10208		1431.81	0	0.0004659				High	23.49	0.130956	High	27.6	0.0508307	High	25.9	0.0718426	High	24.63	0.100722	0
	GDLGIEIPASQVFVAQK	5	1	1	Q10208		1771.96	0	9.366e-05				High	20.73	0.429824	High	27.65	0.0920799	High	10.49	4.16727	High	17.55	0.917636	0
	VAEASIPYGSLYQEMFGLVR	1	1	1	Q10208	M15(Oxidation)	2246.11	0	1.407e-05							High	44.64	0.00458135							0
	AEDVIHIR	1	1	1	Q10208		952.522	0	0.004016							High	39.77	0.00168175							0
	TDVDLPALSEK	1	1	1	Q10208		1187.62	0	0.0005356							High	32.91	0.0176274							0
	EPLSDWQK	4	1	1	Q10208		1002.49	0.001	0.006467				High	18	0.33362	High	34.94	0.00681332	High	26.94	0.0429892	High	21.11	0.164573	0
	GSYPVEAVTYMAETAR	1	1	1	Q10208	M11(Oxidation)	1760.81	0.001	0.02045							High	11.03	6.75264							0
	VMYIDYK	3	1	1	Q10208		931.459	0.005	0.09983				High	22.32	0.110194	High	20.39	0.171853				High	13.75	0.792789	0
P40370	Enolase 1-1 OS=Schizosaccharomyces pombe (strain 972 / ATCC 24843) GN=eno101 PE=1 SV=2 - [ENO11_SCHPO]	71.98	2	23	23	150	335.81	36.45	9	11	914.136	71.75	20	40	838.338	69.7	21	42	455.008	56.72	17	24	728.745	61.73	19	33	439	47.4064	6.66846
	Sequence	# PSMs	# Proteins	# Protein Groups	Protein Group Accessions	Modifications	MH+ [Da]	q-Value	PEP	A2	IonScore A2	Exp Value A2	B2	IonScore B2	Exp Value B2	C2	IonScore C2	Exp Value C2	D2	IonScore D2	Exp Value D2	E2	IonScore E2	Exp Value E2	# Missed Cleavages
	VNQIGSVTESLNAVR	7	1	1	P40370		1586.85	0	9.305e-05	High	79.62	5.96472e-07	High	75.75	1.43812e-06	High	28.28	0.0871501	High	62.68	2.81355e-05	High	26.32	0.126707	0
	GNPTVEVDLTTETGIHR	12	1	1	P40370		1838.93	0	3.547e-10	High	77.57	1.54774e-06	High	95.74	2.28683e-08	High	59.32	0.000104904	High	49.15	0.00107511	High	133.26	4.0739e-12	0
	SGETADTFISHLTVGIGAGQLK	4	1	1	P40370		2202.14	0	1.627e-08	High	69.55	1.11916e-05	High	96.55	2.17879e-08	High	28.81	0.128629				High	27.44	0.177237	0
	AIVPSGASTGIWEALEMR	10	1	1	P40370		1887.97	0	3.94e-08	High	53.26	0.00039016	High	76.43	1.79619e-06	High	86.76	1.68479e-07	High	66.15	1.9607e-05	High	85.7	2.23397e-07	0
	AVGNVNNIIAPAVVK	6	1	1	P40370		1478.87	0	8.16e-06	High	51.82	5.78739e-05	High	58.16	1.51993e-05	High	70.4	8.0257e-07	High	65.84	2.56706e-06	High	50.85	6.29016e-05	0
	KYPIVSIEDPFDQDDWSAWTHMK	7	1	1	P40370		2808.3	0	3.827e-06	High	42.36	0.0134505	High	53.3	0.00110128	High	19.1	2.87391	High	46.96	0.00467889	High	35.96	0.0587136	1
	IEEELGSEGVYAGAHAGK	9	1	1	P40370		1816.87	0	8.996e-07	High	38.85	0.0126603	High	50.87	0.000790228	High	64.85	3.17684e-05	High	59.75	0.000104813	High	53.61	0.000452715	0
	AETDFQIVGDDLTVTNVK	9	1	1	P40370		1964.98	0	4.1e-08	High	29.4	0.111658	High	48.83	0.0013118	High	46.98	0.00200247	High	44.98	0.00291161	High	70.94	8.06587e-06	0
	MSYEAGWGVMVSHR	8	1	1	P40370		1609.73	0	2.062e-06	High	11.59	4.25417	High	48.35	0.000818819	High	24.72	0.203216	High	15.48	1.64079	High	39.42	0.00665155	0
	LTYQQLTDLYVELSK	7	1	1	P40370		1813.96	0	5.526e-06				High	63.7	2.69172e-05	High	57.72	0.000108357	High	45.07	0.00196349	High	51.43	0.000432029	0
	ANLDVTDQK	4	1	1	P40370		1003.51	0	0.000218				High	62.16	1.48385e-05	High	76.16	5.90731e-07	High	39.39	0.00280795	High	61.81	1.60179e-05	0
	KYPIVSIEDPFDQDDWSAWTHMK	2	1	1	P40370	Q13(Deamidated)	2809.3	0	5.29e-06				High	57.84	0.000379932							High	22.08	1.43679	1
	YPIVSIEDPFDQDDWSAWTHMK	4	1	1	P40370		2680.2	0	5.421e-07				High	55.3	0.000585667	High	47.74	0.00329299	High	33.98	0.0792291	High	44.74	0.00669461	0
	MSYEAGWGVMVSHR	5	1	1	P40370	M1(Oxidation)	1625.72	0	4.044e-05				High	48.46	0.00082614	High	56.26	0.000136868	High	27.36	0.10606	High	29.44	0.0658117	0
	YGSSAGNVGDEGGIAPDLQTPQEALDLIVEAINK	2	1	1	P40370		3441.69	0	2.853e-07				High	44.59	0.00802113	High	16.51	4.89376							0
	GPYVLPVPSFNVLNGGSHAGGDLAFQEFMILPTGAPSFSEAMR	12	1	1	P40370	N11(Deamidated)	4479.17	0	2.158e-05				High	37.01	0.0597501	High	21.44	2.18676	High	19.41	3.10033	High	37.05	0.0567367	0
	AIVPSGASTGIWEALEMR	3	1	1	P40370	M17(Oxidation)	1903.96	0	1.046e-07				High	33.83	0.0357075	High	68.02	1.34886e-05							0
	WGAETYHTLK	1	1	1	P40370		1205.6	0	0.004529				High	32.94	0.0169217										0
	IGLDVASSEFYVDGK	3	1	1	P40370		1599.79	0	5.649e-06				High	32.72	0.0375264				High	20.91	0.530774	High	42.88	0.00342627	0
	KYPIVSIEDPFDQDDWSAWTHMK	2	1	1	P40370	M22(Oxidation)	2824.29	0	0.001696				High	31.99	0.14419	High	32.53	0.127108							1
	GPYVLPVPSFNVLNGGSHAGGDLAFQEFMILPTGAPSFSEAMR	6	1	1	P40370		4478.2	0	3.153e-06				High	28.66	0.363846	High	18.44	4.07887				High	14.77	8.97917	0
	AADEFLLK	4	1	1	P40370		906.493	0	0.007432				High	25.39	0.0476962	High	24.24	0.0621561	High	23.94	0.0631705	High	40.72	0.00126237	0
	IGLDVASSEFYVDGKYDLDIK	3	1	1	P40370		2347.17	0	0.0009487				High	14.59	4.67957	High	48.26	0.00202647				High	36.19	0.0318939	1
	YIAENFGTK	4	1	1	P40370		1042.52	0	0.002973				High	14.42	0.755347	High	24.82	0.0674052	High	25.03	0.0656366	High	26.15	0.0496242	0
	LTYQQLTDLYVELSKK	1	1	1	P40370		1942.05	0	2.897e-05							High	53.69	0.000251407							1
	YPIVSIEDPFDQDDWSAWTHMK	1	1	1	P40370	Q12(Deamidated)	2681.2	0	0.0001087							High	36.61	0.0422577							0
	AETDFQIVGDDLTVTNVKR	1	1	1	P40370		2121.08	0	0.00032							High	35.89	0.02633							1
	YPIVSIEDPFDQDDWSAWTHMK	1	1	1	P40370	M21(Oxidation)	2696.21	0	0.0005213							High	22.07	1.19486							0
	VNQIGSVTESLNAVR	3	1	1	P40370	Q3(Deamidated)	1587.83	0	0.0007415							High	17.51	1.05387							0
	GPYVLPVPSFNVLNGGSHAGGDLAFQEFMILPTGAPSFSEAMR	2	1	1	P40370	N11(Deamidated); N14(Deamidated)	4480.18	0	0.002924										High	13.17	14.2006	High	19.09	3.65986	0
	YNELLR	4	2	1	P40370		807.436	0.003	0.05873				High	37.01	0.003414	High	39.71	0.00183343	High	36.68	0.00368353	High	38.83	0.00224525	0
	YDLDIK	3	1	1	P40370		766.398	0.007	0.09851							High	16.28	0.244925	High	15.63	0.284468	High	22.56	0.0576811	0
Q9UTN2	Uncharacterized protein C139.01c OS=Schizosaccharomyces pombe (strain 972 / ATCC 24843) GN=SPAC139.01c PE=1 SV=2 - [YII1_SCHPO]	55.99	1	30	30	125					493.746	42.14	22	30	805.541	51.37	27	40	286.334	35.91	20	24	573.695	47.13	24	31	802	90.096	6.40479
	Sequence	# PSMs	# Proteins	# Protein Groups	Protein Group Accessions	Modifications	MH+ [Da]	q-Value	PEP	A2	IonScore A2	Exp Value A2	B2	IonScore B2	Exp Value B2	C2	IonScore C2	Exp Value C2	D2	IonScore D2	Exp Value D2	E2	IonScore E2	Exp Value E2	# Missed Cleavages
	ASQGTFSGANSGLNPGR	4	1	1	Q9UTN2		1620.77	0	7.608e-07				High	82.61	3.53639e-07	High	87.19	1.24522e-07	High	32.03	0.0404166	High	53.22	0.000307298	0
	ELMAMILASVILNR	8	1	1	Q9UTN2		1573.88	0	3.513e-06				High	75.9	8.63653e-07	High	65.7	8.18227e-06	High	45.39	0.000932244	High	68.24	4.46156e-06	0
	MDASGPANYGESKPTLLYTNQR	2	1	1	Q9UTN2		2413.15	0	1.158e-08				High	58.56	0.000231682	High	34.73	0.0559114							0
	FVDDLEEIWSQGLNLLTQPLNR	8	1	1	Q9UTN2		2600.33	0	2.775e-05				High	51.77	0.000804315	High	63.69	5.26971e-05	High	41.24	0.00895934	High	30.99	0.0970916	0
	EEPVVLFDLLR	4	1	1	Q9UTN2		1329.74	0	0.0001584				High	51.5	0.000312912	High	51.04	0.000348661	High	51.57	0.000307561	High	50.9	0.000358865	0
	AVLHFAEIFPQPIFQDYLQQYK	4	1	1	Q9UTN2		2695.39	0	1.592e-05				High	46.45	0.0026836	High	22.23	0.760581	High	36.92	0.025689	High	45.97	0.0027367	0
	SLNLFIIDK	4	1	1	Q9UTN2		1062.62	0	0.002672				High	42.79	0.000549688	High	43.63	0.000453019	High	31.95	0.00666985	High	43.78	0.000443921	0
	DNAAAVAAVDQR	4	1	1	Q9UTN2		1200.6	0	1.045e-05				High	42.4	0.00179825	High	59.43	3.70011e-05	High	11.92	2.08552	High	43.16	0.00142261	0
	RFVDDLEEIWSQGLNLLTQPLNR	4	1	1	Q9UTN2		2756.44	0	4.378e-05				High	38.31	0.0168304	High	21.59	0.805067	High	29.22	0.132479	High	66.55	2.52514e-05	1
	LGIDASFYLTQIIHSFTPQELQSLAVNGESEYLQHR	4	1	1	Q9UTN2	N27(Deamidated)	4106.04	0	2.935e-05				High	37.89	0.0372494	High	25.08	0.625258				High	29.15	0.278689	0
	LGIDASFYLTQIIHSFTPQELQSLAVNGESEYLQHR	5	1	1	Q9UTN2	Q22(Deamidated); N27(Deamidated)	4107.05	0	0.002047				High	33.94	0.0859361				High	38.86	0.0279341	High	16.71	4.84414	0
	FVDDLEEIWSQGLNLLTQPLNR	1	1	1	Q9UTN2	Q11(Deamidated)	2601.33	0	0.0006004				High	32.58	0.0715768										0
	LPNEIYFYISR	4	1	1	Q9UTN2		1414.74	0	0.001356				High	29.67	0.0544868	High	18.21	0.66066	High	31.82	0.0332446	High	31.75	0.0335174	0
	EPSLLSSSSASIADLSITSATEFLAK	4	1	1	Q9UTN2		2625.35	0	3.27e-05				High	26.6	0.280471	High	34.26	0.048784	High	23.47	0.573244	High	36.85	0.0261167	0
	DIVSLHGHNQQASLK	4	1	1	Q9UTN2		1646.86	0	2.478e-05				High	25.3	0.170432	High	42.02	0.00383744	High	37.58	0.0104313	High	50.67	0.000509509	0
	ISIVDENLLQFYQLQTSFGSNLK	4	1	1	Q9UTN2		2657.38	0	1.28e-06				High	23.97	0.413895	High	12.03	6.57318	High	21.54	0.764937	High	49.62	0.00117221	0
	SHSALTDFEAFDPYDANIQR	5	1	1	Q9UTN2		2297.04	0	2.235e-05				High	23.39	0.667284	High	44.51	0.00498074	High	40.94	0.0116901	High	31.56	0.0994283	0
	TENITPIFVFNGIPLTFEASSQLEVPGK	3	1	1	Q9UTN2		3048.59	0	3.228e-05				High	20.07	1.20246	High	43.86	0.00460899				High	20.73	0.996584	0
	ALNDPVFVK	4	1	1	Q9UTN2		1002.56	0	0.002076				High	19.87	0.488403	High	26.05	0.117825	High	18.57	0.658838	High	19.53	0.529847	0
	FITSMNTSSNVK	3	1	1	Q9UTN2		1328.65	0	0.001935				High	18.31	0.4951	High	16.06	1.14085	High	11.51	3.25259				0
	LGIDASFYLTQIIHSFTPQELQSLAVNGESEYLQHR	4	1	1	Q9UTN2		4105.07	0	2.031e-05				High	16.59	4.18935	High	38.54	0.0256404	High	30.63	0.164301	High	40.98	0.0149026	0
	FGIVMDTK	1	1	1	Q9UTN2		910.47	0	0.00215							High	58.52	4.4642e-05							0
	ISIVDENLLQFYQLQTSFGSNLK	1	1	1	Q9UTN2	Q10(Deamidated)	2658.38	0	0.0001699							High	57.78	0.000182564							0
	TLPFQNINGSLVSGFVVK	4	1	1	Q9UTN2		1920.06	0	4.343e-05							High	57.46	7.82504e-05				High	45.91	0.0011117	0
	ISSDPSSPSTQTTINSAAK	1	1	1	Q9UTN2		1891.92	0	2.631e-06							High	53.03	0.00045966							0
	EFPTIGSAENHIAQFLEFWK	2	1	1	Q9UTN2		2364.17	0	9.233e-07							High	45.69	0.00390498				High	26.25	0.346813	0
	TLPFQNINGSLVSGFVVK	4	1	1	Q9UTN2	N8(Deamidated)	1921.04	0	4.737e-06							High	43.15	0.00260727				High	33.79	0.0230851	0
	TENITPIFVFNGIPLTFEASSQLEVPGK	2	1	1	Q9UTN2	N11(Deamidated)	3049.57	0	0.002782							High	39.74	0.0141577							0
	QLKEPSLLSSSSASIADLSITSATEFLAK	1	1	1	Q9UTN2		2994.59	0	0.000252							High	32.3	0.0471958							1
	AWMIYEENLPSYLSSNFLK	2	1	1	Q9UTN2		2305.12	0	0.005078							High	31.29	0.105137				High	36.85	0.030041	0
	QLKEPSLLSSSSASIADLSITSATEFLAK	1	1	1	Q9UTN2	Q1(Deamidated)	2995.59	0	0.00185							High	27.56	0.143643							1
	MDASGPANYGESKPTLLYTNQR	1	1	1	Q9UTN2	M1(Oxidation)	2429.15	0	0.002242							High	13.18	8.20793							0
	AVLHFAEIFPQPIFQDYLQQYK	1	1	1	Q9UTN2	Q15(Deamidated)	2696.39	0	0.00189										High	13.44	5.26946				0
	GLTLPPVPTESVPNDINIYFGTR	1	1	1	Q9UTN2		2500.31	0	0.003135													High	14.77	3.19423	0
	SAMELVR	3	1	1	Q9UTN2		805.424	0.001	0.02868				High	34.61	0.00537936	High	28.96	0.0240139	High	31.48	0.0110594				0
	MFGSAYR	4	1	1	Q9UTN2		831.382	0.001	0.01897				High	18.59	0.172946	High	23.32	0.0581983	High	11.73	0.839286	High	18.81	0.161115	0
	AYEIIEK	3	1	1	Q9UTN2		865.467	0.001	0.0323				High	16.79	0.216741				High	27.3	0.0192726	High	27.62	0.0179036	0
	TENITPIFVFNGIPLTFEASSQLEVPGK	1	1	1	Q9UTN2	N11(Deamidated); Q22(Deamidated)	3050.57	0.001	0.01196							High	13.32	5.74533							0
	FFEIISK	3	1	1	Q9UTN2		883.492	0.003	0.05415				High	22.62	0.0358295				High	22.82	0.034217	High	26.26	0.0137223	0
	SLNLFIIDKK	2	1	1	Q9UTN2		1190.71	0.003	0.05355							High	15.83	0.165872				High	42.65	0.000344964	1
Q9UUG0	Fatty acid synthase subunit beta OS=Schizosaccharomyces pombe (strain 972 / ATCC 24843) GN=fas1 PE=1 SV=1 - [FAS1_SCHPO]	41.87	1	61	61	223	118.408	8.06	12	12	819.648	31.21	45	53	804.178	35.55	48	59	619.782	29.67	41	48	634.503	31.79	44	51	2073	230.416	6.37939
	Sequence	# PSMs	# Proteins	# Protein Groups	Protein Group Accessions	Modifications	MH+ [Da]	q-Value	PEP	A2	IonScore A2	Exp Value A2	B2	IonScore B2	Exp Value B2	C2	IonScore C2	Exp Value C2	D2	IonScore D2	Exp Value D2	E2	IonScore E2	Exp Value E2	# Missed Cleavages
	ANPTFPIVLQWTGGR	7	1	1	Q9UUG0		1656.88	0	0.0004595	High	34.78	0.0179137	High	49.58	0.000633385	High	30.82	0.0461164	High	49.59	0.000591815	High	49.8	0.000580109	0
	DYLVSAPVSLPLVGLTQLVHFSVTAQILGLNPGELASR	9	1	1	Q9UUG0		3975.18	0	0.0001321	High	33.68	0.0130922	High	25.99	0.0746491	High	45.71	0.000863338	High	31.02	0.0246692	High	18.5	0.429411	0
	LPPMPFDGILFGSR	5	1	1	Q9UUG0		1546.81	0	2.434e-05	High	30.91	0.040913	High	45.18	0.00154425	High	39.15	0.00642146				High	37.24	0.0104123	0
	HNPHSITIHFGGSK	5	1	1	Q9UUG0		1531.78	0	0.0001778	High	29.3	0.0684965	High	30.16	0.0544563				High	13.23	2.76883	High	42.77	0.00307819	0
	EYFQNVYDLTGSQR	5	1	1	Q9UUG0		1719.79	0	0.0001053	High	26.69	0.166288	High	47.35	0.0014266	High	64.77	2.5057e-05	High	33.02	0.0386635	High	31.65	0.0519773	0
	SDYGMVAANPSR	5	1	1	Q9UUG0		1267.57	0	0.0001394	High	25.51	0.0937769	High	27.91	0.0597072	High	16.28	0.723	High	41.41	0.00266702	High	41.6	0.00258745	0
	LSHTGMINGR	5	1	1	Q9UUG0	N8(Deamidated)	1086.54	0	0.004194	High	18.59	0.405385	High	27.79	0.0485716	High	25.89	0.0760015	High	24.65	0.101116	High	36.46	0.00666534	0
	GLNVLDWLAGERPER	5	1	1	Q9UUG0		1724.91	0	1.17e-05	High	15.79	1.42098	High	32.83	0.0280924	High	26.71	0.119344	High	19.3	0.638557	High	16.93	1.06048	0
	VVPVFETITK	4	1	1	Q9UUG0		1132.66	0	0.002702	High	13.91	0.575117	High	24.42	0.055115	High	17.36	0.247014	High	26.7	0.0332453				0
	SLESVSVTEEAGSK	4	1	1	Q9UUG0		1422.7	0	1.353e-06				High	78.5	7.71245e-07	High	84.28	1.78787e-07	High	39.12	0.00592714	High	21.07	0.384952	0
	VALTTLFWIGVR	4	1	1	Q9UUG0		1375.81	0	3.373e-06				High	60.67	1.2727e-05	High	72.88	7.67691e-07	High	64.33	5.49777e-06	High	60.48	1.30723e-05	0
	TYDGPTGGIVTVLSELGEPIHK	4	1	1	Q9UUG0		2283.19	0	1.64e-08				High	57.87	0.000160937	High	68.5	1.36804e-05	High	42.3	0.00578539	High	40.71	0.00835169	0
	SWFQLLDPSQDLSGSILTFR	7	1	1	Q9UUG0		2310.17	0	1.765e-07				High	56.63	0.000269089	High	56.33	0.000270641	High	30.79	0.101417	High	37.87	0.0190006	0
	VEAEQVHQSLR	4	1	1	Q9UUG0		1295.67	0	0.0002665				High	56.29	0.000105733	High	36.03	0.0125353	High	27.58	0.0880767	High	26.7	0.0917186	0
	VPVYSTDDAGDLR	3	1	1	Q9UUG0		1407.68	0	6.496e-07				High	55.1	0.0001352	High	65.14	1.36564e-05	High	60.5	3.89922e-05				0
	FLSISVPFHSPYLAPVR	4	1	1	Q9UUG0		1930.06	0	2.789e-06				High	46.42	0.00111737	High	51.61	0.000325448	High	21.69	0.318492	High	40.98	0.00393411	0
	VEAEQVHQSLR	2	1	1	Q9UUG0	N-Term(Acetyl)	1337.68	0	2.143e-05				High	43.38	0.00249574										0
	SAFEDMR	1	1	1	Q9UUG0		855.367	0	0.007438				High	42.55	0.0015065										0
	HYEVTFVNMVLPNTELITK	4	1	1	Q9UUG0		2248.16	0	1.031e-06				High	41.5	0.00693787	High	11.89	6.38083	High	37.9	0.01621	High	30.83	0.0793822	0
	LVHLSNSFR	2	1	1	Q9UUG0		1072.59	0	0.003851				High	37.85	0.00442139							High	25.18	0.0860108	0
	GTFTDFENTFEHTQETPMQLTLATPK	3	1	1	Q9UUG0		2984.4	0	9.88e-05				High	37.74	0.041175	High	14.15	9.33404	High	17.12	4.71732				0
	VAILQGPMAAK	4	1	1	Q9UUG0		1098.63	0	0.0002384				High	35.72	0.00746148	High	25.73	0.0525246	High	14.28	1.0395	High	39.41	0.00319025	0
	LWFELLAGPEYTWFR	4	1	1	Q9UUG0		1927.97	0	3.011e-06				High	34.73	0.030774	High	56.43	0.00021511							0
	DMVAEGYPIR	2	1	1	Q9UUG0		1150.56	0	0.002944				High	34.73	0.0104319	High	32.92	0.0168977							0
	EEETPGQYTQLLR	3	1	1	Q9UUG0		1563.76	0	0.0004837				High	33.86	0.0264369	High	54.14	0.00023572	High	40.91	0.00554697				0
	MAPMDFAIVVGWQAITK	10	1	1	Q9UUG0		1877.97	0	2.765e-06				High	33.77	0.0342104	High	37.71	0.0139952	High	29.47	0.0975014	High	53.28	0.000404344	0
	GLTMQNAVHR	7	1	1	Q9UUG0		1126.58	0	0.001012				High	33.17	0.0102655	High	25.91	0.0529566	High	35.93	0.00476079	High	32.2	0.0128345	0
	DLQGLQFSALK	4	1	1	Q9UUG0		1219.67	0	0.0009527				High	32.22	0.0152647	High	34.56	0.0089061	High	33.82	0.0105191	High	30.55	0.0224227	0
	AGGHHSFEDFHSPILLTYSAIR	4	1	1	Q9UUG0		2455.21	0	3.012e-09				High	28.61	0.211815	High	13.55	6.5794	High	36.61	0.0327082	High	12.16	9.37744	0
	TYAWQIPLIR	3	1	1	Q9UUG0		1260.71	0	0.0008436				High	27.21	0.0577928				High	42.16	0.00181832	High	27.26	0.0561916	0
	LSYDGETIVVSMFENR	6	1	1	Q9UUG0		1859.88	0	0.0002167				High	26.57	0.217429	High	21.27	0.738611	High	16.46	2.37806	High	23.09	0.516435	0
	LLLALAVMITEK	4	1	1	Q9UUG0		1314.81	0	1.178e-05				High	24.97	0.0270657	High	63.49	3.80556e-06	High	47.23	0.000160849	High	64.09	3.31451e-06	0
	VYFPAHIVEQVSPEK	4	1	1	Q9UUG0		1742.91	0	3.44e-05				High	24.91	0.215502	High	33.11	0.0334238	High	12.4	3.9504	High	12.36	3.96952	0
	FHGSALLDESSVK	4	1	1	Q9UUG0		1389.7	0	0.001198				High	21.62	0.323322	High	15.21	1.41461				High	14.78	1.57847	0
	FSAASGHSQGIVVAAAVSASTDSASFMENAK	1	1	1	Q9UUG0	Q9(Deamidated)	2999.42	0	0.00347				High	19.43	2.71322										0
	IDVPFHSSFLR	4	1	1	Q9UUG0		1317.7	0	0.0001449				High	18.31	0.660379	High	28.49	0.0633568	High	34.7	0.0151124	High	33.61	0.0204255	0
	EGAELEFEHELHLLAGFLGLIAAK	5	1	1	Q9UUG0		2607.39	0	0.001236				High	17.83	1.31359	High	18.39	1.25391				High	25.68	0.207664	0
	DSTSFSFTHPSGLLSATQFTQPALTLMEK	4	1	1	Q9UUG0		3142.54	0	0.0001576				High	11.55	15.7359	High	12.29	13.5127	High	34.62	0.0773295	High	21.92	1.41681	0
	LSHTGMINGR	1	1	1	Q9UUG0		1085.55	0	0.002057							High	32.08	0.0139065							0
	FSAASGHSQGIVVAAAVSASTDSASFMENAK	2	1	1	Q9UUG0		2998.41	0	8.518e-05							High	29.62	0.273897				High	17.97	3.98252	0
	GIVLSELPSK	3	1	1	Q9UUG0		1042.61	0	0.0002127							High	28.02	0.0388092	High	27.71	0.0408335	High	26.06	0.0642891	0
	SLVLSYAHFSPSILIPASQYLLAAQLRDEFLSLHPAPSAESVEK	1	1	1	Q9UUG0		4795.54	0	0.0008067							High	27.36	0.155647							1
	TTLIENFEDLNDPYPVAAR	4	1	1	Q9UUG0		2178.07	0	0.0001917							High	27.02	0.249553	High	19.95	1.267	High	27.11	0.250076	0
	SLVLSYAHFSPSILIPASQYLLAAQLRDEFLSLHPAPSAESVEK	1	1	1	Q9UUG0	Q25(Deamidated)	4796.53	0	0.0007295							High	20.12	0.849695							1
	AGFTYELAGGGYFDPK	2	1	1	Q9UUG0		1692.79	0	3.07e-06							High	16.12	1.79226	High	19.3	0.881761				0
	ELLDGINETHIQHFIK	2	1	1	Q9UUG0		1907	0	0.003064							High	14.27	2.89				High	20.25	0.722207	0
	SLYGLNLSLR	2	1	1	Q9UUG0		1135.65	0	6.029e-07										High	63.76	6.79474e-06	High	47.07	0.000317083	0
	SLVLSYAHFSPSILIPASQYLLAAQLR	2	1	1	Q9UUG0		2958.64	0	1.174e-07										High	53.87	0.000107063	High	68	4.30299e-06	0
	VIVADSFESLDMGAK	2	1	1	Q9UUG0		1581.78	0	3.082e-06										High	26.61	0.15421	High	10.75	6.55447	0
	IITLEFER	4	1	1	Q9UUG0		1020.57	0.001	0.003964	High	31.36	0.0114423	High	30.82	0.0128331				High	31.12	0.0113198	High	31.53	0.0103352	0
	AIDLMYVTK	4	1	1	Q9UUG0		1053.56	0.001	0.1425	High	18.49	0.303688	High	22.63	0.130709	High	12.68	1.15725				High	16.35	0.497081	0
	EVIEVISR	5	1	1	Q9UUG0		944.54	0.001	0.01758	High	12.49	1.22873	High	27.99	0.0391577	High	31.04	0.0194007	High	25.21	0.070655	High	23.01	0.123259	0
	AIFTTQR	1	1	1	Q9UUG0		836.463	0.001	0.01032				High	33.3	0.00584669										0
	SFVVSGPAR	3	1	1	Q9UUG0		919.5	0.001	0.02076				High	25.12	0.0573692	High	25.13	0.0572373				High	32.28	0.0110326	0
	LPALLAK	4	1	1	Q9UUG0		725.492	0.001	0.0118				High	23.96	0.00482149	High	15.67	0.0325223	High	11.78	0.0796492	High	28.36	0.00175058	0
	SIEFAPNWVK	2	1	1	Q9UUG0		1190.62	0.001	0.007485				High	17.01	0.792288	High	22.53	0.222271							0
	DNYMAMAYEK	2	1	1	Q9UUG0		1235.51	0.001	0.005353							High	22.34	0.174158				High	12.96	1.53012	0
	LKETLTIEQLK	1	1	1	Q9UUG0		1315.78	0.001	0.007528							High	17.06	0.265665							1
	DSLWQSEDLAAVVGEDVGR	1	1	1	Q9UUG0		2045.97	0.001	0.006538										High	14	4.71956				0
	GYATIPLK	2	1	1	Q9UUG0		862.503	0.001	0.0214										High	10.94	0.833567	High	25.57	0.0287039	0
	HFLTNYGFSIIDIVK	1	1	1	Q9UUG0		1766.95	0.001	0.009418													High	13.12	2.52784	0
	ELDDTIFSLPRPK	1	1	1	Q9UUG0		1530.81	0.002	0.03051							High	13.13	2.50013							0
	SDYGMVAANPSR	1	1	1	Q9UUG0	M5(Oxidation)	1283.57	0.002	0.02028										High	16.02	0.817613				0
	WIDVTLR	2	1	1	Q9UUG0		902.509	0.006	0.09757				High	22	0.209162	High	22.44	0.189295							0
	GVDDSEWEK	1	1	1	Q9UUG0		1064.45	0.006	0.05749										High	10.02	1.77182				0
	FEIFDR	1	1	1	Q9UUG0		826.41	0.009	0.1357							High	28.94	0.0266137							0
Q10161	Probable clathrin heavy chain OS=Schizosaccharomyces pombe (strain 972 / ATCC 24843) GN=chc1 PE=1 SV=1 - [CLH_SCHPO]	43.58	1	47	47	165	89.67	7.08	6	7	761.503	31.27	30	40	785.726	32.65	33	37	705.56	28.39	28	33	735.993	39.62	40	48	1666	189.898	5.23682
	Sequence	# PSMs	# Proteins	# Protein Groups	Protein Group Accessions	Modifications	MH+ [Da]	q-Value	PEP	A2	IonScore A2	Exp Value A2	B2	IonScore B2	Exp Value B2	C2	IonScore C2	Exp Value C2	D2	IonScore D2	Exp Value D2	E2	IonScore E2	Exp Value E2	# Missed Cleavages
	VLVEDIVSLDR	4	1	1	Q10161		1257.71	0	0.001306	High	52.49	0.00026801	High	50.07	0.0003139	High	54.53	0.000107825				High	45.84	0.000831363	0
	IVDIFMSQNLVQQATAFLLDALKDDNPEHSHLQTR	6	1	1	Q10161	N26(Deamidated)	4009.03	0	4.432e-08	High	34.29	0.0735474	High	14.94	5.83862	High	41.2	0.0141437	High	55.19	0.000560282	High	30.04	0.183403	1
	IAGNLQLYSK	5	1	1	Q10161		1106.62	0	1.442e-05	High	25.46	0.0460803	High	45.78	0.000429391	High	39.85	0.00170281	High	47.17	0.000313702				0
	IVDIFMSQNLVQQATAFLLDALKDDNPEHSHLQTR	4	1	1	Q10161		4008.04	0	0.0009292	High	23.44	0.842389	High	42.27	0.0109395				High	41.48	0.0136873	High	46.71	0.00362511	1
	LIQAAPGQIAPILQYFGTLLDK	3	1	1	Q10161		2370.34	0	0.02026	High	23.2	0.117264	High	11.64	1.71715							High	13.99	0.859899	0
	RPISADSVILHPK	4	1	1	Q10161		1432.83	0	4.472e-05	High	20.79	0.13464	High	14.14	0.639894				High	29.25	0.0197291	High	13.13	0.902285	0
	LLEINLINAPQVADAILGNQMFTHFDR	4	1	1	Q10161		3053.58	0	5.83e-07	High	10.91	9.65044	High	69.97	1.22946e-05				High	56.54	0.000260416	High	48.83	0.00166462	0
	ALNFYLEQHPMLLTDLLAALTPR	4	1	1	Q10161		2640.44	0	3.107e-17				High	73.54	2.58693e-06	High	46.49	0.00131491	High	79.02	6.44115e-07	High	63.84	2.70753e-05	0
	ADDPSNYSEVIELASR	4	1	1	Q10161		1765.83	0	2.547e-07				High	72.58	4.41386e-06	High	72.94	4.06019e-06	High	42.87	0.00429142	High	54.47	0.000283496	0
	VSQPLESHASAFAVIQPEGVDHEVQVLALASR	3	1	1	Q10161		3384.75	0	1.124e-09				High	69.04	1.67773e-05	High	30.12	0.111963				High	35.38	0.0335657	0
	LLLPYLESLLQSGSQDR	6	1	1	Q10161		1932.04	0	8.378e-07				High	67.7	9.8583e-06	High	75.93	1.48057e-06	High	65.27	1.72357e-05	High	70.74	5.21603e-06	0
	VSGESIFVTTAHK	3	1	1	Q10161		1375.72	0	2.824e-06				High	65.26	1.16162e-05				High	35.02	0.0122762	High	46.47	0.000917475	0
	LATYTSQQNITPDYVSLLQNLVR	4	1	1	Q10161		2637.39	0	6.411e-13				High	60.46	7.5198e-05	High	33.32	0.0401102	High	70.92	7.39109e-06	High	51.35	0.000596886	0
	IVLQPSSFSENANLQNLLFLTAIK	4	1	1	Q10161		2660.46	0	7.675e-07				High	58.68	5.42076e-05	High	33.04	0.0175545	High	52.09	0.000231138	High	41.29	0.00259314	0
	DIIVHVANLELYYR	6	1	1	Q10161		1717.93	0	6.554e-06				High	50.88	0.00040135	High	46.15	0.00119511	High	48.34	0.000709325	High	58.74	7.54508e-05	0
	LLEINLINAPQVADAILGNQMFTHFDR	3	1	1	Q10161	Q20(Deamidated)	3054.59	0	0.0001251				High	42.65	0.00658419	High	30.03	0.113712							0
	QNLQIVVQIATR	4	1	1	Q10161		1382.81	0	0.0001236				High	39.35	0.00161441	High	29.53	0.0154887	High	34.7	0.00504878	High	46.28	0.000327352	0
	VIVHSNLLNPEWLMNYFSR	4	1	1	Q10161		2332.19	0	1.977e-05				High	39.29	0.013937	High	51.73	0.000809072	High	42.45	0.00670678	High	38.89	0.0155463	0
	AQDYAETVEQPEVWSR	4	1	1	Q10161		1907.87	0	0.0001176				High	38.59	0.0132407	High	44.15	0.00368824	High	50.36	0.000866143	High	41.06	0.00736816	0
	NNMFQFIEIYVQR	8	1	1	Q10161		1701.84	0	2.647e-05				High	37.79	0.0138645	High	60.03	8.19817e-05	High	54.15	0.000324019	High	37.4	0.015522	0
	WTQSIELSK	4	1	1	Q10161		1091.57	0	0.001604				High	36.99	0.00494966	High	33.49	0.0110809	High	25.19	0.0708298	High	16.2	0.593711	0
	YSDLVGAQR	4	1	1	Q10161		1008.51	0	0.002086				High	31.82	0.013186	High	32.23	0.0129556	High	33.18	0.00964083	High	32.51	0.011249	0
	KGQVLSVSINPETIIPYILSNLNDPGLAVR	4	1	1	Q10161	N10(Deamidated)	3221.8	0	0.00215				High	28.02	0.0392036				High	31.03	0.0184199	High	28.93	0.0326882	1
	IPDAIESYLK	3	1	1	Q10161		1148.62	0	0.0006067				High	26.87	0.0529392	High	29.8	0.0298432	High	27.81	0.0471067				0
	SDSNLWSEVLQDSAYR	4	1	1	Q10161		1869.86	0	0.0001636				High	24.77	0.324757	High	30.69	0.0763951	High	10.87	7.50941	High	18.55	1.28955	0
	VNPDQAAEFATQMFNSNPSINLEK	2	1	1	Q10161		2665.25	0	0.0003281				High	24.3	0.723751							High	14.19	7.63846	0
	ENNFYDTLTVGK	4	1	1	Q10161		1400.67	0	7.106e-06				High	23.16	0.206749	High	14.53	1.59272	High	29.14	0.0513804	High	14.5	1.53634	0
	MASHANLPGADNLYMQQFQQLMAQGNYSEAAK	7	1	1	Q10161	Q20(Deamidated)	3528.62	0	0.002172				High	20.99	2.54851	High	24.13	1.25898	High	21.49	2.30755	High	19.49	3.67577	0
	MASHANLPGADNLYMQQFQQLMAQGNYSEAAK	3	1	1	Q10161		3527.6	0	0.0004726				High	11.64	22.1036	High	16.95	6.59198				High	14.68	11.0803	0
	IYIDSNNNPEVFLK	4	1	1	Q10161		1665.85	0	0.001858				High	10.43	6.90168	High	11.67	5.03769	High	22.34	0.451587	High	21.37	0.553658	0
	FSPDEVYDYLR	3	1	1	Q10161		1403.65	0	9.26e-05							High	60.52	4.50675e-05	High	44.7	0.00172302	High	28.34	0.0633117	0
	NDLVMEISWR	3	1	1	Q10161		1262.62	0	0.0001949							High	56.66	8.26416e-05	High	27.95	0.066695	High	49.17	0.000463054	0
	GYFEEVISLMEAGLGLER	2	1	1	Q10161		2013	0	5.371e-05							High	45.17	0.00295574				High	32.79	0.0508659	0
	YDFVNDLVFYLFR	3	1	1	Q10161		1710.86	0	2.473e-05							High	43.16	0.00328963				High	40.02	0.00691807	0
	IYETANVPNK	3	1	1	Q10161		1148.6	0	0.0001976							High	41.02	0.00198065	High	38.17	0.00381775	High	61.53	1.77174e-05	0
	SNYNEEWFTLIGISSR	2	1	1	Q10161		1915.91	0	2.214e-05							High	39.89	0.0107693				High	51.95	0.000694431	0
	TNQLTEMETFLIGSNVADVK	1	1	1	Q10161		2210.1	0	6.408e-05							High	36.26	0.0297514							0
	VSQPLESHASAFAVIQPEGVDHEVQVLALASR	1	1	1	Q10161	Q25(Deamidated)	3385.75	0	3.552e-06							High	30.5	0.109891							0
	GQVLSVSINPETIIPYILSNLNDPGLAVR	2	1	1	Q10161		3092.7	0	3.523e-05							High	30.13	0.034259				High	27.56	0.0625258	0
	HSSLNGTQIISYK	1	1	1	Q10161	N5(Deamidated)	1448.74	0	0.001176							High	27.1	0.0960298							0
	KGQVLSVSINPETIIPYILSNLNDPGLAVR	3	1	1	Q10161		3220.8	0	0.006432							High	25.71	0.0592118	High	18.31	0.321704	High	20.04	0.206588	1
	ALMEVDLPSQLIELLEK	2	1	1	Q10161		1941.06	0	3.475e-06										High	41.21	0.00412852	High	12.94	2.77963	0
	NPNNPAFATK	1	1	1	Q10161		1073.54	0	0.001121													High	18.71	0.30551	0
	FSEVLQLASVGIQPSSFGFANVTLESDK	1	1	1	Q10161		2970.51	0	0.0002124													High	14.73	5.30006	0
	SVNGLMAINR	1	1	1	Q10161		1074.57	0	0.009041													High	14.35	1.45627	0
	ALELYDKPADIK	3	1	1	Q10161		1375.75	0.001	0.0239				High	30.83	0.0325459							High	12.44	2.29491	0
	RDPYLAFIAYEK	1	1	1	Q10161		1485.77	0.001	0.02076													High	31.25	0.0403068	1
	TSQVIDQFK	2	1	1	Q10161		1065.56	0.003	0.05948							High	16.41	0.524545				High	10.68	1.98803	0
	LSIVEVDR	1	1	1	Q10161		930.526	0.003	0.05329													High	34.77	0.00820229	0
	YLLMAR	1	1	1	Q10161		766.427	0.004	0.0562				High	24.86	0.0187788										0
	IIEMFEK	1	1	1	Q10161		909.475	0.007	0.1069				High	18.68	0.248										0
	LSIVEVDRNPNNPAFATK	1	1	1	Q10161		1985.05	0.008	0.08805										High	14.38	2.75389				1
P40998	Thiamine thiazole synthase OS=Schizosaccharomyces pombe (strain 972 / ATCC 24843) GN=thi2 PE=2 SV=2 - [THI4_SCHPO]	69.82	1	16	16	113	246.18	37.5	8	8	662.376	69.82	16	29	766.65	69.82	16	33	383.564	53.35	12	17	405.434	69.51	15	26	328	35.252	6.31592
	Sequence	# PSMs	# Proteins	# Protein Groups	Protein Group Accessions	Modifications	MH+ [Da]	q-Value	PEP	A2	IonScore A2	Exp Value A2	B2	IonScore B2	Exp Value B2	C2	IonScore C2	Exp Value C2	D2	IonScore D2	Exp Value D2	E2	IonScore E2	Exp Value E2	# Missed Cleavages
	AYPTYSLDESFSFAPIR	9	1	1	P40998		1963.94	0	3.363e-07	High	82.18	6.20777e-07	High	103.6	4.51357e-09	High	86.31	2.42771e-07	High	75.27	3.09499e-06	High	50.53	0.000953712	0
	AAQEALAIFDER	6	1	1	P40998		1333.68	0	1.431e-05	High	68.97	5.3178e-06	High	76.08	1.0456e-06	High	70.76	3.63066e-06	High	64.39	1.52662e-05	High	40.06	0.00426566	0
	MGPTFGGMMFSGIK	2	1	1	P40998		1460.67	0	5.247e-06	High	51.45	0.000373111										High	55.01	0.000164218	0
	LFNATAVEDLIVK	8	1	1	P40998		1432.8	0	0.0001411	High	48.12	0.000521095	High	62.19	1.77561e-05	High	58.57	3.69032e-05	High	32.53	0.0144644	High	49.7	0.000285024	0
	APATAVVTPQTAFK	7	1	1	P40998		1401.77	0	1.349e-07	High	46.13	0.00100072	High	53.23	0.000192748	High	89.23	4.90132e-08	High	28.6	0.0615651	High	20.13	0.4377	0
	EVFPGMIVGGMELSEFDGANR	9	1	1	P40998		2255.05	0	4.451e-08	High	37.07	0.027703	High	77.56	2.46596e-06	High	55.84	0.00035157	High	55.87	0.000367914	High	26.34	0.322396	0
	HAALFTSTVMAR	9	1	1	P40998		1304.68	0	2.521e-06	High	21.74	0.261925	High	50.49	0.000348836	High	58.15	6.78272e-05	High	57.79	7.34397e-05	High	29.22	0.0467327	0
	LASAQLVSNLHDMRPLDMNR	9	1	1	P40998		2281.15	0	6.058e-05	High	18.27	1.75894	High	22.05	0.73476	High	29.03	0.151406	High	31.61	0.0827252	High	30.14	0.114063	0
	MGPTFGGMMFSGIK	5	1	1	P40998	M1(Oxidation)	1476.67	0	1.993e-06				High	59.73	5.99645e-05	High	24.67	0.19175				High	57.63	0.000104154	0
	YFSDLDKYAESDIVIVGAGSAGLTAAYYIGTR	4	1	1	P40998		3386.68	0	7.236e-10				High	50.1	0.00207419	High	98.15	3.2972e-08				High	40.65	0.018266	1
	IAIIEASVAPGGGAWLGGQLFSAMVVR	10	1	1	P40998		2670.45	0	3.579e-19				High	43.12	0.00266191	High	45.91	0.00160537	High	75.08	1.8053e-06	High	57.44	0.000102051	0
	IAIIEASVAPGGGAWLGGQLFSAMVVR	3	1	1	P40998	M24(Oxidation)	2686.44	0	1.735e-05				High	35.52	0.0173516	High	20.28	0.583164				High	12.78	3.56935	0
	YAESDIVIVGAGSAGLTAAYYIGTR	3	1	1	P40998		2518.3	0	7.058e-08				High	34.99	0.0421077	High	77.32	2.19087e-06				High	46.06	0.00294194	0
	KPADLFLNEIGVPYEDEGDYVVVK	4	1	1	P40998		2709.36	0	2.853e-05				High	34.03	0.0590875	High	36.3	0.0354096	High	20.24	1.42929	High	16.57	3.30439	0
	RLASAQLVSNLHDMRPLDMNR	3	1	1	P40998		2437.26	0	0.002181				High	18.97	1.38681	High	16.25	2.57175	High	12.38	6.46022				1
	HAALFTSTVMAR	3	1	1	P40998	M10(Oxidation)	1320.67	0	0.003876				High	18.93	0.631375	High	24.48	0.176087				High	27.01	0.0983393	0
	EVFPGMIVGGMELSEFDGANR	3	1	1	P40998	M11(Oxidation)	2271.04	0	0.003				High	15.89	3.67383	High	12.5	7.96838				High	11.74	9.36164	0
	LFNATAVEDLIVK	3	1	1	P40998	N3(Deamidated)	1433.79	0	2.38e-06							High	60.77	3.12398e-05	High	32.3	0.0250259	High	22.98	0.187806	0
	IAIIEASVAPGGGAWLGGQLFSAMVVR	2	1	1	P40998	Q19(Deamidated)	2671.45	0	0.000276							High	23.34	0.272043				High	36.23	0.0138889	0
	TDLPVEK	4	1	1	P40998		801.436	0.001	0.0141				High	38.63	0.00174102	High	21.52	0.089496	High	33.56	0.00559505	High	23.69	0.0543005	0
	AEDLIVK	4	1	1	P40998		787.456	0.001	0.02046				High	38.29	0.00279455	High	39	0.00237307	High	28.99	0.0237854	High	15.95	0.478973	0
	TLALPNVK	3	1	1	P40998		855.53	0.001	0.005618				High	31.41	0.00350543	High	33.76	0.00204052				High	31.66	0.00330934	0
Q9C102	Putative glutamate synthase [NADPH] OS=Schizosaccharomyces pombe (strain 972 / ATCC 24843) GN=glt1 PE=2 SV=1 - [GLT1_SCHPO]	26.39	1	42	42	97	37.82	1.23	3	3	592.187	17.95	27	33	747.641	23.35	34	37	141.55	4.17	7	7	283.497	10.18	17	17	2111	232.701	6.34131
	Sequence	# PSMs	# Proteins	# Protein Groups	Protein Group Accessions	Modifications	MH+ [Da]	q-Value	PEP	A2	IonScore A2	Exp Value A2	B2	IonScore B2	Exp Value B2	C2	IonScore C2	Exp Value C2	D2	IonScore D2	Exp Value D2	E2	IonScore E2	Exp Value E2	# Missed Cleavages
	LGLAILAWR	5	1	1	Q9C102		1012.63	0	0.0003553	High	35.31	0.00331247	High	54.08	6.09712e-05	High	57.26	2.11423e-05	High	54.75	3.76836e-05	High	44.95	0.000359876	0
	IFTWNDLVFK	5	1	1	Q9C102		1282.68	0	0.0003745	High	17.57	0.499581	High	31.8	0.0197878	High	43.18	0.00144011	High	19.61	0.328734	High	26.83	0.0590313	0
	VYDAVVLASGSTVPR	4	1	1	Q9C102		1533.83	0	2.85e-06				High	78.16	7.50799e-07	High	57.65	7.8852e-05	High	60.81	4.25713e-05	High	40.59	0.00429502	0
	NSEEFFPADLVILALGFLGPEEQATAGMNVDR	2	1	1	Q9C102		3450.69	0	9.152e-10				High	77.18	4.51477e-06	High	72.44	1.39776e-05							0
	YAGLPWELGVAETHQTLVLNDLR	4	1	1	Q9C102		2595.36	0	7.38e-08				High	72.43	5.52048e-06	High	51.65	0.000712636	High	44.67	0.00351429	High	52.82	0.000525008	0
	GQLAPVQVYNYFLDLNNAEYVSHFALVHSR	3	1	1	Q9C102		3464.75	0	4.165e-09				High	68.09	2.64992e-05	High	98.09	2.67011e-08				High	68.84	2.36025e-05	0
	GQLAPVQVYNYFLDLNNAEYVSHFALVHSR	5	1	1	Q9C102	N17(Deamidated)	3465.74	0	5.038e-07				High	57.63	0.000332828	High	66.79	4.04792e-05							0
	FGEEFASLLPIIER	4	1	1	Q9C102		1620.86	0	5.851e-06				High	55.5	0.000171217	High	54.98	0.000192995	High	26.84	0.12338	High	43.69	0.0025782	0
	FEGQPEHVVNFFYYVAEELR	3	1	1	Q9C102		2473.19	0	8.064e-08				High	51.61	0.00115615	High	54.85	0.000552224				High	13.52	7.56985	0
	MPTPILTVEEFNALK	2	1	1	Q9C102		1702.91	0	6.422e-06				High	47.86	0.000927257	High	59.43	6.47092e-05							0
	AFDNPWPQYPR	1	1	1	Q9C102		1390.65	0	0.0003281				High	45.65	0.00138449										0
	LIIYPPR	2	1	1	Q9C102		871.54	0	0.006406				High	40.76	0.00135153				High	23.75	0.0678931				0
	MLLVDTK	2	1	1	Q9C102		819.464	0	0.007118				High	40.32	0.00125875	High	25.44	0.0508651							0
	VVIQTDGQIR	4	1	1	Q9C102		1128.64	0	0.001248				High	36.33	0.00806684	High	32.33	0.0203799	High	27.37	0.0634897	High	38.37	0.00507227	0
	LAAHNGEINTLR	3	1	1	Q9C102		1308.7	0	0.0002401				High	31.16	0.0311215	High	24.93	0.129993				High	20.51	0.425038	0
	ADHILVSGHDGGTGASR	1	1	1	Q9C102		1649.8	0	0.001928				High	28.35	0.100671										0
	GMLDFDFDSSQAIPIEQVEPWTEIVR	2	1	1	Q9C102	Q11(Deamidated)	3023.45	0	0.001813				High	26.69	0.516329										0
	SLQIPDMGDFYYR	2	1	1	Q9C102		1604.74	0	0.0008998				High	25.27	0.222726	High	15.5	2.05601							0
	MAQGAKPGEGGELPGNK	2	1	1	Q9C102		1640.81	0	0.006188				High	20.35	0.689622	High	13.45	3.37536							0
	SEGVAGYAAAIER	3	1	1	Q9C102		1293.64	0	0.000344				High	16.57	0.779836	High	29.06	0.0423403							0
	QLFAQVTNPPIDPIR	2	1	1	Q9C102		1708.95	0	0.004038				High	12.88	1.93211	High	27.72	0.0486847							0
	GMLDFDFDSSQAIPIEQVEPWTEIVR	2	1	1	Q9C102		3022.46	0	9.043e-05				High	10.17	23.5018	High	27.69	0.397114							0
	GVTFEHIALDAFALHER	3	1	1	Q9C102		1925.98	0	3.121e-09							High	84.81	2.87091e-07				High	46.33	0.00203708	0
	FGVTSWYLSDADELQIK	1	1	1	Q9C102		1971.97	0	1.811e-06							High	57.23	0.000195858							0
	YGEEGLPTDSIR	1	1	1	Q9C102		1336.64	0	0.000152							High	51.63	0.000265208							0
	NEAAYAEFSR	2	1	1	Q9C102		1157.52	0	0.0002102							High	32.97	0.0125408				High	22.02	0.157015	0
	VASIDITFFK	1	1	1	Q9C102		1140.63	0	0.00141							High	20.38	0.133768							0
	LLDLTPLLTPAFTLRPGAATYNVR	1	1	1	Q9C102		2613.47	0	0.0003792							High	19.32	0.260798							0
	AAYDGEAEFDTDLFER	1	1	1	Q9C102		1848.79	0	0.001672							High	14.09	2.83683							0
	AIVLSDR	1	1	1	Q9C102		773.452	0.001	0.01433				High	30.12	0.0339975										0
	GQSLVVWGIQEGR	1	1	1	Q9C102		1428.76	0.001	0.01707				High	27.39	0.0721351										0
	ADRPGGLLQYGIPNMK	3	1	1	Q9C102		1729.91	0.001	0.02465				High	26.76	0.13453	High	15.95	1.66688				High	16.15	1.53362	0
	RGQSLVVWGIQEGR	1	1	1	Q9C102		1584.86	0.001	0.007308							High	22.05	0.31405							1
	HSTAGVGLISPPPHHDIYSIEDLK	1	1	1	Q9C102		2583.32	0.001	0.01017							High	20.09	1.31448							0
	NGDVSLDELHK	1	1	1	Q9C102		1226.6	0.001	0.007174							High	12.94	2.03772							0
	KFEGQPEHVVNFFYYVAEELR	2	1	1	Q9C102		2601.28	0.002	0.02821							High	38.61	0.0249068				High	22.76	0.9526	1
	ILSDFPR	2	1	1	Q9C102		847.467	0.002	0.04505							High	19.74	0.255338				High	24.87	0.0783637	0
	FSTNTFPSWDR	1	1	1	Q9C102		1357.62	0.002	0.03118							High	16.29	0.858791							0
	LLYDYFR	4	1	1	Q9C102		989.509	0.003	0.0611	High	24.94	0.0766298	High	23.45	0.115901	High	25.01	0.0754046				High	38.17	0.00364249	0
	QLYVLR	3	1	1	Q9C102		791.478	0.003	0.06164				High	25.78	0.0196859	High	28.95	0.0094876				High	28.53	0.010451	0
	SLLDSELK	1	1	1	Q9C102		904.499	0.004	0.07732													High	18.53	0.192887	0
	AFMPGNPIR	1	1	1	Q9C102		1002.52	0.007	0.09488							High	14.31	1.28441							0
	DLPIPNR	1	1	1	Q9C102		824.462	0.008	0.1138				High	17.82	0.171804										0
	QLIYDMK	1	1	1	Q9C102		910.47	0.009	0.1355				High	20.44	0.287361										0
O13799	Uncharacterized helicase C17H9.02 OS=Schizosaccharomyces pombe (strain 972 / ATCC 24843) GN=SPAC17H9.02 PE=1 SV=1 - [YE02_SCHPO]	43.69	1	35	37	116					567.923	34.95	27	32	735.831	41.65	35	45	281.066	21.84	17	17	387.689	27.28	21	22	1030	118.386	6.18896
	Sequence	# PSMs	# Proteins	# Protein Groups	Protein Group Accessions	Modifications	MH+ [Da]	q-Value	PEP	A2	IonScore A2	Exp Value A2	B2	IonScore B2	Exp Value B2	C2	IonScore C2	Exp Value C2	D2	IonScore D2	Exp Value D2	E2	IonScore E2	Exp Value E2	# Missed Cleavages
	ELVTEIFDSAINQLSEEDR	6	1	1	O13799		2208.06	0	7.451e-07				High	80.94	1.09411e-06	High	64.81	4.4699e-05	High	65.29	4.15749e-05	High	32.35	0.079428	0
	GLSIVILDQSIDEQAAR	4	1	1	O13799		1827.98	0	3.203e-06				High	68.96	7.60439e-06	High	47.72	0.000949183	High	61.07	5.01805e-05	High	50.36	0.000534781	0
	FIFLSATLPNALQFAR	6	1	1	O13799		1809.01	0	7.58e-07				High	65.26	1.0127e-05	High	50.87	0.000233262	High	55.12	9.15139e-05	High	65.5	8.11694e-06	0
	ILFATETFSIGLNMPAR	4	1	1	O13799		1880.99	0	3.387e-06				High	59.44	7.30926e-05	High	84.25	2.39596e-07				High	26.17	0.153986	0
	ITNTEAIIQLR	5	1	1	O13799		1271.73	0	2.535e-05				High	51.11	0.00024047	High	64.77	1.03195e-05	High	62.08	1.92336e-05	High	53.16	0.000149507	0
	GVVWEETLILLPDAIR	6	1	1	O13799		1824.03	0	7.789e-07				High	45.29	0.000656679	High	71.77	1.66984e-06	High	24.48	0.0867959	High	40.83	0.00207336	0
	IATVSLESK	4	1	1	O13799		947.541	0	0.0004262				High	44.17	0.000434506	High	45.04	0.000346228	High	26.56	0.0250609	High	53.33	5.27225e-05	0
	TYPFELDPFQSTAIK	3	1	1	O13799		1756.88	0	1.042e-05				High	43.92	0.00340627	High	24.2	0.308334				High	20.74	0.683101	0
	ELVEILFQEGLVR	3	1	1	O13799		1544.87	0	6.889e-06				High	43.25	0.0015543	High	38.09	0.00534797				High	64.54	1.25683e-05	0
	VVVPDDYDYIPLNK	3	1	1	O13799		1649.84	0	7.722e-05				High	35.58	0.0187737	High	22.32	0.400332	High	19.06	0.832528				0
	TVIAEYAIAQALK	3	1	1	O13799		1390.79	0	1.104e-05				High	35.37	0.00545956				High	22.37	0.151231	High	55.06	5.69197e-05	0
	NFQFSEGSR	2	1	1	O13799		1071.49	0	0.0016				High	35.27	0.00655252	High	28.07	0.0364156							0
	LGGIIFPWGVLVNVIK	4	1	1	O13799		1725.05	0	0.0004423				High	33.57	0.00474705	High	10.02	0.985451	High	17.8	0.181725				0
	LYEGSIVR	4	1	1	O13799		936.515	0	0.005302				High	32.73	0.00765336	High	33.16	0.00693189	High	35.91	0.00368003	High	23.92	0.0608263	0
	IINMVLSNR	4	1	1	O13799		1059.6	0	0.001801				High	30.11	0.0276897	High	32.62	0.0156994	High	32.73	0.0151467	High	34.05	0.0111768	0
	IEEISPEDILK	2	1	1	O13799		1285.69	0	0.000615				High	29.41	0.0418112	High	14.95	1.09242							0
	EIPYLDPLEHMHIESSTLSLSLR	4	1	1	O13799		2680.37	0	6.018e-06				High	28.75	0.189693	High	11	11.2239	High	22.08	0.881774	High	27.43	0.263215	0
	VNEVIEEFK	3	1	1	O13799		1106.57	0	0.001421				High	27.43	0.0397578	High	50.81	0.000183397	High	32.61	0.0121169				0
	MYLTIIEAAK	4	1	1	O13799		1152.63	0	0.0004429				High	23.9	0.086772	High	36.97	0.00422914	High	25.52	0.0541449	High	20.48	0.188474	0
	WLTSGEYMQMSGR	4	1	1	O13799		1545.68	0	0.0004138				High	20.98	0.343537	High	30.94	0.0397052	High	26.54	0.0924988	High	27.22	0.0916109	0
	EQVAPHETYVLDVLLPISSNSMSNHK	1	1	1	O13799	Q2(Deamidated)	2909.45	0	0.0005476				High	20.66	1.55868										0
	EQVAPHETYVLDVLLPISSNSMSNHK	2	1	1	O13799		2908.45	0	4.173e-06				High	16.76	3.90623	High	27.57	0.324159							0
	NSEIMHEIAWVIFDEVHYMR	4	1	1	O13799		2519.19	0	7.766e-07				High	15.63	4.98092	High	28.6	0.241705				High	46.85	0.00376416	0
	NEETSINIPNETAVK	2	1	1	O13799		1658.83	0	0.0002654				High	10.6	6.16207	High	49.78	0.000734269							0
	MESVLVSAHTSAGK	4	1	1	O13799		1416.72	0	0.0002953							High	41.25	0.00397819				High	33.01	0.0265018	0
	LDLNDTENKELVTEIFDSAINQLSEEDR	1	1	1	O13799		3250.56	0	0.0001005							High	38.58	0.035806							1
	VIYTSPIK	2	2	2	O14232;O13799		920.545	0	0.007534							High	35.53	0.00198728				High	36.29	0.00166824	0
	VNEVIEEFKEIPYLDPLEHMHIESSTLSLSLR	1	1	1	O13799	N2(Deamidated)	3768.92	0	0.0004339							High	32.55	0.0856648							1
	QLEHAAIVLGNNELK	1	1	1	O13799		1648.9	0	0.0001632							High	30.57	0.038588							0
	VNEVIEEFKEIPYLDPLEHMHIESSTLSLSLR	1	1	1	O13799		3767.91	0	0.0002608							High	26.91	0.349149							1
	MESVLVSAHTSAGK	1	1	1	O13799	M1(Oxidation)	1432.71	0	0.003639							High	21.23	0.348804							0
	GIGIHHSGLLPILK	4	2	2	O14232;O13799		1454.88	0	0.0007354							High	18.22	0.195859	High	15.98	0.328053	High	19.56	0.143861	0
	LFDSPYYK	4	1	1	O13799		1032.5	0.001	0.01293				High	27.34	0.0282287	High	31.89	0.0111632	High	34.4	0.00628125	High	27.24	0.0288863	0
	LDLNDTENK	2	1	1	O13799		1061.51	0.001	0.006526				High	14.86	0.819735	High	23.33	0.116593							0
	SEVSTLNLK	1	1	1	O13799		990.547	0.001	0.009259							High	32.72	0.0149143							0
	FSGNNFR	2	1	1	O13799		841.395	0.002	0.02535				High	27.64	0.0236757	High	32.27	0.00815272							0
	YGEEIQK	1	1	1	O13799		866.425	0.004	0.0695							High	16.08	0.364974							0
	YLNPLLK	2	1	1	O13799		860.524	0.005	0.07272				High	16.08	0.300857	High	15.86	0.31649							0
	SFYQFQNMESLPLIK	1	1	1	O13799		1844.93	0.006	0.08689							High	14.03	3.74808							0
	KLEILEPK	1	1	1	O13799		969.598	0.006	0.1058													High	25.86	0.0132303	1
O42938	6-phosphofructokinase OS=Schizosaccharomyces pombe (strain 972 / ATCC 24843) GN=pfk1 PE=1 SV=1 - [K6PF_SCHPO]	49.79	1	30	30	129	217.664	18.26	11	11	923.34	39.17	22	31	703.48	47.77	27	36	637.308	30.04	18	23	570.482	38.22	22	28	942	102.491	6.18896
	Sequence	# PSMs	# Proteins	# Protein Groups	Protein Group Accessions	Modifications	MH+ [Da]	q-Value	PEP	A2	IonScore A2	Exp Value A2	B2	IonScore B2	Exp Value B2	C2	IonScore C2	Exp Value C2	D2	IonScore D2	Exp Value D2	E2	IonScore E2	Exp Value E2	# Missed Cleavages
	ANDLGNDPSSAVVIGIR	7	1	1	O42938		1697.88	0	5.409e-09	High	70.2	5.76338e-06	High	88.31	9.84296e-08	High	38.23	0.0103191	High	88.09	9.96632e-08	High	87.74	1.06429e-07	0
	IAVMTSGGDSPGMNAVVR	5	1	1	O42938		1761.86	0	9.149e-12	High	49.54	0.000912176	High	39.44	0.00907258	High	35.22	0.0238983	High	56.87	0.000167658	High	39.15	0.00965652	0
	GWLAEGGTLIGTAR	9	1	1	O42938		1401.75	0	7.556e-07	High	48.83	0.000528255	High	47.46	0.000716996	High	51.49	0.000283122	High	59.68	4.2951e-05	High	54.59	0.000138667	0
	YQAFPNEK	5	1	1	O42938		996.478	0	0.007467	High	35.07	0.00754591	High	40.19	0.0023212	High	37.29	0.00452597	High	35.03	0.00761573	High	25.47	0.0716575	0
	AFIVEVMGR	5	1	1	O42938		1021.55	0	0.0001244	High	32.46	0.0128833	High	35.9	0.00497372	High	18.19	0.364851	High	39.72	0.0020692	High	22.9	0.149756	0
	TAVPGHVQQGGNPTPMDR	5	1	1	O42938		1861.9	0	2.946e-08	High	28.35	0.136129	High	63.76	3.9359e-05	High	27.19	0.17246	High	42.52	0.00523933	High	54.37	0.000330315	0
	SGYIATVGGLITGASAIYTPEDGISLDMLR	5	1	1	O42938		3041.55	0	6.971e-11	High	22.35	0.930783	High	39.46	0.0171219	High	47.3	0.00296724	High	53.6	0.000672016	High	23.68	0.768173	0
	GHTPLAIDNGFSGFLR	9	1	1	O42938	N9(Deamidated)	1702.86	0	1.082e-06	High	21.23	0.565393	High	65.71	1.91062e-05	High	49.82	0.000743172	High	41.65	0.00520799	High	33.8	0.0307233	0
	VYTTEVIGNIISEEAHK	5	1	1	O42938		1902.98	0	3.404e-06	High	17.47	1.45218	High	24.43	0.310639	High	21.63	0.563396	High	42.9	0.00434137	High	58.05	0.000125888	0
	EDWMHVAGNNSAESVTIK	3	1	1	O42938		1987.92	0	0.0001431	High	16.51	2.38322	High	33.06	0.0554617	High	37.75	0.0181982							0
	IDALIIIGGFEAFTALSQLESAR	8	1	1	O42938		2435.32	0	6.856e-19				High	99.05	6.6146e-09	High	110.7	4.73658e-10	High	115.53	1.44707e-10	High	104.38	1.93867e-09	0
	HLTIVGLVGSIDNDMSSTDVTIGAFSSLHR	1	1	1	O42938	N13(Deamidated)	3143.58	0	4.169e-10				High	90.54	1.57188e-07										0
	HLTIVGLVGSIDNDMSSTDVTIGAFSSLHR	3	1	1	O42938		3142.58	0	4.365e-08				High	81.09	1.39735e-06	High	54.88	0.000599298				High	23.79	0.751468	0
	SIVIVAEGAIDSELNHISPEDIK	2	1	1	O42938		2449.29	0	2.554e-10				High	77.89	1.53452e-06	High	69.16	1.16728e-05							0
	VAIIHVGAPAGGMNSATR	4	1	1	O42938		1721.91	0	4.471e-09				High	58.42	9.98526e-05	High	52.93	0.00035806	High	65.81	1.79628e-05	High	72.16	4.15052e-06	0
	DMHNLVNILAGK	8	1	1	O42938		1324.7	0	7.013e-06				High	52.29	0.000213948	High	63.55	1.55654e-05	High	41.32	0.00262694	High	37.06	0.00702535	0
	VASFGTSDSDNAR	4	1	1	O42938		1326.59	0	1.37e-05				High	40.46	0.00314374	High	33.29	0.0165022	High	49.22	0.00042604	High	63.34	1.61975e-05	0
	LTHEVADAIEK	3	1	1	O42938		1225.64	0	0.004999				High	38.36	0.00343551	High	30.81	0.019543	High	36.95	0.00475325				0
	LVPGELSLSPAAEDSEWR	5	1	1	O42938		1955.97	0	3.185e-05				High	35.78	0.0260806	High	48.66	0.00142611	High	34.47	0.0378531	High	21.59	0.722896	0
	GHTPLAIDNGFSGFLR	4	1	1	O42938		1701.87	0	1.273e-05				High	35.5	0.020546	High	46.42	0.00163729	High	31.37	0.0490925	High	26.21	0.16107	0
	VAIIHVGAPAGGMNSATR	1	1	1	O42938	N14(Deamidated)	1722.9	0	3.296e-05				High	24.03	0.265686										0
	SEESGAASNLESGLATPVVETLK	4	1	1	O42938		2289.15	0	1.894e-07				High	20.94	0.98981	High	13.65	5.69389	High	43.61	0.00539164	High	13.46	5.6307	0
	SSLVFYYPNLLDLLK	2	1	1	O42938		1784.99	0	0.001868				High	18.71	0.630536	High	24.42	0.169321							0
	IAVMTSGGDSPGMNAVVR	1	1	1	O42938	N14(Deamidated)	1762.85	0	0.001145				High	12.54	4.39341										0
	KPDEVYVEDPLGNLIGFSDR	2	1	1	O42938		2263.12	0	8.802e-06							High	39.94	0.0131555				High	17.6	2.27999	0
	VAIIHVGAPAGGMNSATR	2	1	1	O42938	M13(Oxidation)	1737.91	0	0.0001806							High	22.26	0.39461				High	30.27	0.060988	0
	YNPFAHANLK	3	1	1	O42938		1174.6	0	0.001405							High	19.76	0.483494	High	12.21	2.63915	High	14.18	1.7283	0
	AGQLILR	1	1	1	O42938		770.489	0.001	0.1267	High	45.9	0.000172217													0
	QLQWGDVR	3	1	1	O42938		1001.52	0.001	0.02216				High	32.31	0.0110742	High	32.12	0.0113853	High	19.18	0.234316				0
	QLSADAIK	2	1	1	O42938		845.473	0.001	0.01091							High	19.54	0.314064				High	16.07	0.698262	0
	VASFGTSDSDNAR	1	1	1	O42938	N11(Deamidated)	1327.58	0.001	0.009552							High	11.17	2.38699							0
	KQFAHAMELR	2	1	1	O42938		1230.64	0.002	0.03898				High	17.42	0.680158	High	18.71	0.702539							1
	ICEAVDSISSTAISHSR	1	1	1	O42938	S7(Phospho)	1855.82	0.004	0.05697							High	14.62	2.84053							0
	DPEFADYLHTWEGTTFIEDESHFVPK	2	1	1	O42938		3110.4	0.004	0.07519							High	14.56	9.32604				High	11.92	17.253	0
	VNYPSFR	1	1	1	O42938		882.447	0.004	0.0843													High	26.53	0.047023	0
	NAWWR	1	1	1	O42938	N1(Deamidated)	733.341	0.007	0.1191													High	20.24	0.00943996	0
Q92372	Replication factor A protein 1 OS=Schizosaccharomyces pombe (strain 972 / ATCC 24843) GN=ssb1 PE=1 SV=1 - [RFA1_SCHPO]	70.11	1	31	31	144	720.66	57.14	20	31	704.757	61.9	25	39	696.345	63.71	28	42	179.165	33.33	13	14	291.823	41.38	16	18	609	68.1542	6.7417
	Sequence	# PSMs	# Proteins	# Protein Groups	Protein Group Accessions	Modifications	MH+ [Da]	q-Value	PEP	A2	IonScore A2	Exp Value A2	B2	IonScore B2	Exp Value B2	C2	IonScore C2	Exp Value C2	D2	IonScore D2	Exp Value D2	E2	IonScore E2	Exp Value E2	# Missed Cleavages
	VVLSDSINYAQSMLSTQLNHLVAENK	5	1	1	Q92372		2874.47	0	1.912e-05	High	108.41	2.11847e-09	High	47.18	0.00279577	High	58.83	0.000189962	High	64.37	5.30478e-05	High	43.4	0.00688375	0
	FSFVSLQEVGDVAK	4	1	1	Q92372		1525.79	0	8.524e-08	High	76.48	1.17063e-06	High	71.95	2.97112e-06	High	86.11	1.17677e-07				High	45.48	0.00143835	0
	IGNPAGLETVDALR	5	1	1	Q92372		1425.77	0	0.0002982	High	72.89	1.61924e-06	High	58.7	4.26272e-05	High	45.77	0.000864735							0
	DAVIDVIGVLQNVGPVQQITSR	4	1	1	Q92372		2321.28	0	0.0001122	High	72.64	1.99832e-06	High	47.92	0.000605384	High	51.78	0.000255873							0
	LFSVNLLDESGEIR	6	1	1	Q92372		1591.83	0	0.001396	High	72.19	3.02276e-06	High	30.49	0.0526604	High	33.95	0.0227938	High	47.12	0.0010704	High	57.23	0.000109567	0
	GAFVQLTQFTVNVMK	6	1	1	Q92372		1682.9	0	0.0003847	High	68.35	6.68215e-06	High	49.74	0.000522885	High	53.34	0.00022454	High	14.7	1.6417	High	20.41	0.402637	0
	YTVMSINQMDWK	4	1	1	Q92372		1515.7	0	0.003437	High	60.68	4.30526e-05	High	33.17	0.0242661				High	18.29	0.710867	High	26.31	0.11776	0
	SLSMLTSSTMSVDPDIQESHLLK	4	1	1	Q92372		2519.24	0	9.299e-08	High	56.89	0.000328045	High	79.96	1.63146e-06	High	49.78	0.00165579				High	33.15	0.077395	0
	TAIEFSVSEESILAFK	1	1	1	Q92372		1770.92	0	0.003501	High	55.04	0.000193794													0
	KPAAPNSLSTIIYPIEGLSPYQNK	5	1	1	Q92372		2601.39	0	1.215e-09	High	50.36	0.000653979	High	63.21	3.24242e-05	High	55.45	0.00023022				High	38.18	0.0108871	0
	NIAEVQAEHLGMSETPDYFSLK	5	1	1	Q92372		2479.18	0	0.000883	High	48.6	0.00249781	High	32.41	0.103255	High	44.15	0.00691496	High	17.88	2.89363	High	36.67	0.0387178	0
	VVLSDSINYAQSMLSTQLNHLVAENK	1	1	1	Q92372	M13(Oxidation)	2890.46	0	0.06742	High	40.16	0.0154405													0
	KILIVLGLNVLTELGVMDK	4	1	1	Q92372		2068.24	0	2.071e-05	High	34.2	0.00209104	High	25.18	0.0203271	High	53.74	2.30354e-05							1
	KPAAPNSLSTIIYPIEGLSPYQNK	4	1	1	Q92372	N6(Deamidated)	2602.39	0	5.486e-07	High	29.8	0.0765975	High	14.99	2.89065	High	22.61	0.501125				High	51.11	0.000558387	0
	HSVISSTLSTTGR	11	1	1	Q92372		1345.71	0	2.026e-06	High	26.57	0.095607	High	53.35	0.000192351	High	60.59	3.51807e-05	High	28.15	0.0636932	High	47.98	0.000739581	0
	TGISTSTNSFYGNNAAATAPAPPPMMK	5	1	1	Q92372		2697.27	0	0.0004719	High	25.92	0.520544	High	29.97	0.202192	High	20.4	1.88421							0
	YIITIAVGDHTGQLWLNVFDDVGK	5	1	1	Q92372		2674.39	0	1.226e-05	High	25.75	0.318356	High	29.57	0.123822	High	23.4	0.558105	High	12.06	7.23113				0
	KNIAEVQAEHLGMSETPDYFSLK	2	1	1	Q92372		2607.28	0	0.04636	High	24.55	0.602066													1
	AEDQTAVPVAK	4	1	1	Q92372		1128.59	0	0.04605	High	21.18	0.217574	High	20.16	0.189392	High	21.62	0.13532				High	17.88	0.329932	0
	DITIVDQTGYEMR	3	1	1	Q92372		1540.73	0	2.539e-05	High	15.69	1.74814	High	53.68	0.000250701	High	48.75	0.000822783							0
	SLSMLTSSTMSVDPDIQESHLLK	1	1	1	Q92372	M10(Oxidation)	2535.23	0	0.09221	High	14.86	5.5177													0
	KQYTNVQNEYELMFER	3	1	1	Q92372		2091.98	0	0.0002286	High	13.95	4.96349	High	38.08	0.0191306	High	40.6	0.0105691							1
	YIITIAVGDHTGQLWLNVFDDVGK	2	1	1	Q92372	N17(Deamidated)	2675.39	0	0.0002595	High	12.94	5.61516	High	50.05	0.00105973										0
	IINTSDASSFPPNPILQVLTVK	1	1	1	Q92372		2354.3	0	0.01199	High	11.29	3.27671													0
	ATGFNDQVDAFYDILQEGSVYYISR	4	1	1	Q92372		2871.35	0	1.045e-06				High	59.33	0.000258565	High	37.49	0.0400322	High	39.94	0.0224328	High	12.73	11.8027	0
	ELNSNPTSGAPK	2	1	1	Q92372	N3(Deamidated)	1215.59	0	8.801e-05				High	54.14	0.000191197	High	28.04	0.077733							0
	VFDQGGSWR	4	1	1	Q92372		1051.5	0	0.00133				High	49.46	0.00022648	High	36.06	0.00495484	High	19.58	0.214249	High	31.03	0.0157772	0
	ELNSNPTSGAPK	4	1	1	Q92372		1214.6	0	0.001005				High	38.35	0.00610459	High	20.22	0.396878	High	32.73	0.0222667	High	27.55	0.0733933	0
	ILIVLGLNVLTELGVMDK	6	1	1	Q92372		1940.15	0	0.001411				High	35.78	0.00348798	High	20.41	0.0996355	High	37.96	0.0018235	High	26.26	0.0259068	0
	QYTNVQNEYELMFER	2	1	1	Q92372		1963.89	0	1.032e-05				High	16.05	2.47941	High	56.43	0.000221936							0
	NIAEVQAEHLGMSETPDYFSLK	1	1	1	Q92372	M12(Oxidation)	2495.18	0	0.001057							High	20	1.795							0
	ATGFNDQVDAFYDILQEGSVYYISR	2	1	1	Q92372	Q7(Deamidated)	2872.34	0	0.0006986							High	18.78	2.97778							0
	NIAEVQAEHLGMSETPDYFSLK	1	1	1	Q92372	Q6(Deamidated)	2480.18	0	4.652e-05										High	16	4.40334				0
	LSVGALR	5	1	1	Q92372		715.446	0.001	0.0286				High	36.39	0.00598147	High	36.11	0.00637981	High	35.49	0.00735881	High	31.07	0.0203614	0
	EYDAPQYR	2	1	1	Q92372		1041.46	0.001	0.01475				High	15.67	0.677548	High	42.04	0.00156293							0
	TGISTSTNSFYGNNAAATAPAPPPMMK	6	1	1	Q92372	N13(Deamidated)	2698.26	0.001	0.02266				High	14	8.18508	High	21.01	1.59253							0
	YTVMSINQMDWK	1	1	1	Q92372	M4(Oxidation)	1531.69	0.001	0.01681							High	22.35	0.328306							0
	YTVMSINQMDWKEESK	1	1	1	Q92372		1988.91	0.002	0.0223							High	14.09	4.16653							1
	GTIVYIR	2	1	1	Q92372		821.488	0.004	0.07292							High	42.27	0.000418012				High	29.79	0.00739927	0
	KAEDQTAVPVAK	1	1	1	Q92372		1256.68	0.004	0.05092							High	34.41	0.0109035							1
	VTLWGK	2	1	1	Q92372		703.414	0.004	0.05487							High	28.78	0.0425776	High	15.97	0.813169				0
	GTIVYIR	2	1	1	Q92372	N-Term(Acetyl)	863.499	0.006	0.09095				High	37.9	0.00208403	High	41.86	0.000847117							0
	SLSMLTSSTMSVDPDIQESHLLK	1	1	1	Q92372	M10(Oxidation); Q17(Deamidated)	2536.23	0.008	0.1112							High	19.16	2.06337							0
P36604	78 kDa glucose-regulated protein homolog OS=Schizosaccharomyces pombe (strain 972 / ATCC 24843) GN=bip1 PE=3 SV=2 - [GRP78_SCHPO]	62.75	1	32	33	158	101.03	9.05	5	5	722.171	59.13	26	35	691.086	51.89	28	35	800.515	61.24	30	41	757.939	61.24	30	42	663	73.1816	4.95752
	Sequence	# PSMs	# Proteins	# Protein Groups	Protein Group Accessions	Modifications	MH+ [Da]	q-Value	PEP	A2	IonScore A2	Exp Value A2	B2	IonScore B2	Exp Value B2	C2	IonScore C2	Exp Value C2	D2	IonScore D2	Exp Value D2	E2	IonScore E2	Exp Value E2	# Missed Cleavages
	ITPSYVAFTEDER	5	1	1	P36604		1527.73	0	0.0004368	High	54.96	0.000187343	High	41.14	0.00444173	High	56.94	0.00011511	High	55.61	0.000156493	High	52.26	0.000346175	0
	VEIIANDQGNR	6	3	3	P36604;Q10265;O59855		1228.63	0	5.992e-05	High	45.49	0.000800853	High	45.97	0.000857432	High	31.16	0.0217047	High	46.21	0.000617475	High	51.04	0.000223127	0
	DAGTIAGLNVIR	5	1	1	P36604		1199.67	0	1.639e-08	High	42.93	0.00134463	High	31.49	0.0186974	High	50.79	0.000219675	High	54.03	0.000104377	High	21.35	0.196031	0
	SFPFHIVNDK	6	1	1	P36604		1203.62	0	0.003304	High	21.4	0.31187	High	24.77	0.14204	High	30.7	0.0353222	High	27.51	0.0755805	High	27.74	0.068569	0
	SEIDDIVLVGGSTR	5	1	1	P36604		1460.76	0	5.374e-06	High	17.18	0.970528	High	24.97	0.163509	High	63.51	2.31296e-05	High	55.8	0.000131382	High	52.43	0.00029374	0
	QAVLDAVEDVAEWLEIHGEDASKEEFEDQR	4	1	1	P36604		3457.61	0	4.264e-09				High	83.99	1.24117e-06	High	69.14	3.73925e-05	High	31.05	0.24197	High	96.75	6.50532e-08	1
	KSEIDDIVLVGGSTR	8	1	1	P36604		1588.85	0	1.279e-06				High	80.04	5.15728e-07	High	95.17	1.49155e-08	High	85.46	1.39521e-07	High	65.7	1.33096e-05	1
	LSEEDIER	4	1	1	P36604		990.474	0	0.0009145				High	67.03	4.01259e-06	High	68.43	2.76332e-06	High	37.97	0.00307207	High	49.9	0.000196984	0
	IEIESFFNGQDFSETLSR	7	1	1	P36604		2119	0	1.606e-06				High	58.77	0.00017442	High	58.02	0.000205957	High	45.47	0.00369213	High	22.39	0.769406	0
	IVNEPTAAAIAYGLDK	5	1	1	P36604		1645.88	0	5.897e-14				High	58.75	7.3477e-05				High	77.02	1.09632e-06	High	49.75	0.00055346	0
	NQAPSNPENTIFDIK	4	1	1	P36604		1687.83	0	5.193e-11				High	54.36	0.000289302	High	33.57	0.0361303	High	55.35	0.000241709	High	22.77	0.442573	0
	VQELLESFFGK	4	1	1	P36604		1296.69	0	0.000107				High	53.54	0.000140522	High	40.14	0.0027257	High	37.94	0.00452354	High	35.71	0.00757267	0
	SQIFSTAVDNQNTVLIQVYEGER	4	1	1	P36604		2611.31	0	1.473e-11				High	53.49	0.000718132	High	10.66	12.941	High	54.45	0.000549868	High	50.46	0.00146123	0
	IVNEPTAAAIAYGLDKTDTEK	4	1	1	P36604		2220.14	0	4.172e-07				High	51.83	0.00067911	High	49.62	0.00114438	High	42.63	0.00595422	High	52.88	0.000540217	1
	GQFDDDEQLGGK	4	1	1	P36604		1308.57	0	5.141e-05				High	49.99	0.000320738	High	50.28	0.000275643	High	49.7	0.000315562	High	50.01	0.000315772	0
	NRPLVEVNVGGK	8	1	1	P36604		1281.73	0	0.0001174				High	49.56	0.000146074	High	58.74	1.73757e-05	High	33.69	0.00564383	High	44.97	0.000420314	0
	GINPDEAVAYGAAVQAGVLSGEEGSDNIVLLDVIPLTLGIETTGGVMTK	3	1	1	P36604		4854.49	0	1.135e-17				High	47.83	0.00202394				High	73.65	5.77373e-06	High	60.41	0.000109417	0
	FTPEEISAMILSK	4	1	1	P36604		1465.76	0	2.525e-05				High	46.28	0.00156022	High	44.73	0.00222939	High	34.83	0.0214905	High	48.47	0.000939448	0
	FEEINMDLFK	4	1	1	P36604		1285.61	0	0.001202				High	36.12	0.00995698	High	43.62	0.00169676	High	37.41	0.00706236	High	24.54	0.136757	0
	NTLENYAYSLK	4	1	1	P36604		1315.65	0	0.0001474				High	33.52	0.0181187	High	48.41	0.000589104	High	27.05	0.0803762	High	28.97	0.0521639	0
	QAVLDAVEDVAEWLEIHGEDASK	4	1	1	P36604		2524.22	0	5.295e-13				High	30.2	0.162969	High	30.47	0.157095	High	63.6	7.54736e-05	High	35.41	0.0502682	0
	VEIIANDQGNR	5	3	3	P36604;Q10265;O59855	N6(Deamidated)	1229.61	0	0.003923				High	27.79	0.061879	High	23.53	0.154819	High	30.58	0.0325494	High	41.11	0.00226143	0
	QTAEAYLGKPVTHAVVTVPAYFNDAQR	6	1	1	P36604		2946.51	0	4.552e-08				High	25.28	0.416707	High	13.33	6.55199	High	26.99	0.279881	High	27.12	0.275606	0
	HIVVYDLGGGTFDVSLLSIDNGVFEVLATSGDTHLGGEDFDNR	4	1	1	P36604	N21(Deamidated)	4552.2	0	8.922e-06				High	24.43	1.19694				High	17.41	6.33343	High	24.07	1.20715	0
	LDAVVHPITQK	4	1	1	P36604		1220.7	0	5.806e-06				High	19.75	0.14194				High	21.74	0.0941188	High	22.42	0.0767547	0
	EAEEFAEEDK	4	1	1	P36604		1196.5	0	0.0005268				High	19.69	0.205669	High	34.9	0.006213	High	27.22	0.0364168	High	12.1	1.27943	0
	SFPFHIVNDK	4	1	1	P36604	N8(Deamidated)	1204.6	0	0.001721				High	13.19	1.66228	High	22.93	0.179284	High	17.97	0.578506				0
	HIVVYDLGGGTFDVSLLSIDNGVFEVLATSGDTHLGGEDFDNR	1	1	1	P36604	N21(Deamidated); N42(Deamidated)	4553.19	0	0.007486				High	12.69	17.0847										0
	AKFEEINMDLFK	2	1	1	P36604		1484.75	0	0.0008552							High	35.64	0.0146	High	23.9	0.218152				1
	KSQIFSTAVDNQNTVLIQVYEGER	3	1	1	P36604		2739.4	0	2.561e-05							High	32.56	0.0767879	High	27.81	0.218313	High	50.63	0.00122133	1
	KFTPEEISAMILSK	3	1	1	P36604		1593.85	0	0.001696							High	26.74	0.117781	High	18.81	0.730607	High	11.02	4.38431	1
	HIVVYDLGGGTFDVSLLSIDNGVFEVLATSGDTHLGGEDFDNR	3	1	1	P36604		4551.2	0	3.544e-05							High	12.82	17.1529	High	48	0.00541162	High	48.95	0.00412488	0
	IEIESFFNGQDFSETLSR	4	1	1	P36604	N8(Deamidated)	2119.98	0	4.455e-05							High	11.76	8.26507				High	51.08	0.00096582	0
	TLKPVEQVLK	3	1	1	P36604		1154.71	0	7.701e-05										High	28.18	0.013913	High	14.29	0.340738	0
	QTAEAYLGKPVTHAVVTVPAYFNDAQR	2	1	1	P36604	Q1(Deamidated)	2947.51	0	0.0002187										High	27	0.279636	High	20.84	1.16574	0
	VQELLESFFGKK	1	1	1	P36604		1424.78	0.001	0.01879							High	45.26	0.000698462							1
	ITPSYVAFTEDERLVGEAAK	1	1	1	P36604		2196.12	0.001	0.004741							High	20.11	1.0486							1
	QAVLDAVEDVAEWLEIHGEDASKEEFEDQR	1	1	1	P36604	Q29(Deamidated)	3458.6	0.001	0.01186													High	43.01	0.015096	1
	VINYLAR	4	1	1	P36604		848.499	0.002	0.02635				High	36.37	0.00224908	High	38.2	0.00147572	High	37.54	0.00171793	High	34.43	0.00351564	0
	QKLDAVVHPITQK	1	1	1	P36604		1476.85	0.003	0.05317													High	17.34	0.234317	1
P41887	Heat shock protein 90 homolog OS=Schizosaccharomyces pombe (strain 972 / ATCC 24843) GN=swo1 PE=1 SV=2 - [HSP90_SCHPO]	56.39	1	32	32	127	151.28	14.35	9	9	564.558	41.05	24	29	685.992	52.13	29	35	498.043	40.63	23	25	456.158	43.32	24	29	704	80.5461	4.95752
	Sequence	# PSMs	# Proteins	# Protein Groups	Protein Group Accessions	Modifications	MH+ [Da]	q-Value	PEP	A2	IonScore A2	Exp Value A2	B2	IonScore B2	Exp Value B2	C2	IonScore C2	Exp Value C2	D2	IonScore D2	Exp Value D2	E2	IonScore E2	Exp Value E2	# Missed Cleavages
	GVVDSEDLPLNLSR	5	1	1	P41887		1513.79	0	4.046e-07	High	71.91	4.06149e-06	High	72.51	3.08576e-06	High	89.17	7.34228e-08	High	89.32	6.43225e-08	High	89.26	7.19169e-08	0
	ELISNASDALDK	5	1	1	P41887		1275.64	0	2.162e-05	High	48.14	0.000597733	High	52.94	0.000197928	High	63.46	1.91372e-05	High	34.52	0.0137565	High	46.83	0.000882876	0
	HSEFISYPIQLVVTR	8	1	1	P41887		1788.96	0	9.207e-06	High	45.73	0.00151426	High	52.33	0.000331868	High	53.24	0.000259885	High	44.12	0.00219575	High	57.1	0.000106851	0
	APMDLFEAK	5	1	1	P41887		1021.5	0	0.002071	High	25.2	0.0789717	High	34.23	0.00955258	High	23.01	0.126509	High	49.14	0.000244407	High	38.38	0.0036811	0
	HFSVEGQLEFR	6	1	1	P41887		1348.66	0	0.002069	High	21.53	0.308297	High	37.79	0.00729406	High	28.55	0.0616497	High	23.75	0.17142	High	32.24	0.0266875	0
	QAVENSPFLEIFR	5	1	1	P41887		1549.8	0	4e-06	High	17.13	1.05535	High	57.28	0.0001085	High	64.29	2.00905e-05	High	45.65	0.00157917	High	71.99	3.43716e-06	0
	DGLELEETDEEK	5	1	1	P41887		1406.62	0	0.000361	High	13.86	1.6631	High	24.34	0.148908	High	44.65	0.00132994	High	16.44	0.91816	High	28.28	0.0576543	0
	DLATILYETALLSSGFTLDDPSAYAQR	6	1	1	P41887		2931.46	0	1.537e-17				High	96.33	4.39427e-08	High	96.59	3.96021e-08	High	109.96	1.88377e-09	High	57.6	0.000318365	0
	FEAEISQLMSLIINTVYSNK	8	1	1	P41887		2300.18	0	9.541e-12				High	72.1	6.69006e-06	High	65.66	2.90252e-05	High	73.5	4.86885e-06	High	61.73	7.08693e-05	0
	KFDVLFMVDPIDEYAVTQLK	4	1	1	P41887		2371.23	0	8.968e-07				High	63.98	4.15543e-05	High	65.9	2.67835e-05	High	53.7	0.000442576	High	37.37	0.0196058	1
	FDVLFMVDPIDEYAVTQLK	4	1	1	P41887		2243.13	0	1.119e-06				High	48.31	0.00187562	High	49.76	0.00130464	High	42.87	0.00659464				0
	DLATILYETALLSSGFTLDDPSAYAQR	2	1	1	P41887	Q26(Deamidated)	2932.46	0	0.0008995				High	42.98	0.00913098	High	16.74	3.79822							0
	NPSEVTKEEYASFYK	4	1	1	P41887		1791.84	0	0.0003342				High	39.34	0.0103374	High	35.45	0.025317	High	22.39	0.491982	High	32.94	0.0450992	1
	YNSLNSPDDLISLEDYITK	4	1	1	P41887		2200.07	0	5.545e-05				High	36.05	0.0323801	High	19.76	1.39289	High	10.29	11.9264	High	16.6	2.82878	0
	ETTTETEELNK	4	1	1	P41887		1294.6	0	0.0003202				High	32.61	0.0194912	High	43.45	0.00152501	High	27.9	0.0548172	High	29.42	0.0410293	0
	YQSLSDPHALDAEK	4	1	1	P41887		1573.75	0	3.062e-10				High	29.37	0.0726038				High	40.44	0.00550774	High	18.95	0.773653	0
	KHSEFISYPIQLVVTR	3	1	1	P41887		1917.06	0	0.0001938				High	26.76	0.0894058	High	35.95	0.0107737				High	31.35	0.0310718	1
	SLTNDWEDHLAVK	3	1	1	P41887		1527.74	0	0.001281				High	24.34	0.202287	High	15.47	1.52396	High	13.85	2.24593				0
	IEEVDDESEK	3	1	1	P41887		1192.52	0	0.001349				High	23.97	0.0903954	High	40.2	0.00215351	High	33.67	0.0121559				0
	NIYFITGESK	4	1	1	P41887		1171.6	0	0.002169				High	22.21	0.169531	High	22.22	0.168541	High	14.85	0.923101	High	22.64	0.15355	0
	DTSMSAYMSSR	4	1	1	P41887		1235.5	0	0.002605				High	13.39	1.37443	High	23.72	0.126112	High	26.82	0.0620789	High	22.28	0.175694	0
	LGIHEDAANRPALAK	1	1	1	P41887		1575.86	0	0.001726				High	12.32	2.072										0
	VKETTTETEELNK	2	1	1	P41887		1521.77	0	0.001507				High	12.16	3.26568	High	23.62	0.249626							1
	SNTETFKFEAEISQLMSLIINTVYSNK	4	1	1	P41887	N-Term(Acetyl)	3149.57	0	4.665e-07							High	75.87	5.12207e-06				High	23.07	0.949853	1
	KTFEINPK	3	1	1	P41887		976.545	0	0.002413							High	48.61	0.000215533	High	48.05	0.000245197	High	34.94	0.00501781	1
	QFMEAAASGADISMIGQFGVGFYSAYLVADK	1	1	1	P41887		3244.54	0	0.000266							High	23.24	1.29705							0
	EVPEEEETEEVKNEEDDKAPK	1	1	1	P41887		2473.11	0	0.00282							High	21.82	1.06869							2
	LISLGLSIDEEEEAPIEEISTESVAAENNAESK	1	1	1	P41887		3516.69	0	0.001311							High	20.06	2.68169							0
	AILFVPR	5	1	1	P41887		815.514	0.001	0.0161	High	28.57	0.0205018	High	42.94	0.000749535	High	23.21	0.0704356	High	41.05	0.00115822	High	32.23	0.00882657	0
	TFYDAFSK	5	1	1	P41887		978.457	0.001	0.1205	High	27.82	0.0194931	High	18.29	0.174937	High	27.64	0.020318	High	26.2	0.0283062	High	23.31	0.0550658	0
	KFDVLFMVDPIDEYAVTQLK	1	1	1	P41887	M7(Oxidation)	2387.22	0.001	0.01843							High	22.04	0.74208							1
	LISLGLSIDEEEEAPIEEISTESVAAENNAESK	2	1	1	P41887	N29(Deamidated)	3517.7	0.001	0.01351													High	11.93	16.633	0
	RAPMDLFEAK	1	1	1	P41887		1177.6	0.002	0.03804													High	26.75	0.0748175	1
	EYEEFAK	3	1	1	P41887		915.41	0.003	0.02471							High	18.08	0.139259	High	12.96	0.452713	High	14.95	0.286301	0
	EVPEEEETEEVKNEEDDK	1	1	1	P41887		2176.93	0.003	0.04247							High	13.41	5.07113							1
P0CT42	Transposon Tf2-7 polyprotein OS=Schizosaccharomyces pombe (strain 972 / ATCC 24843) GN=Tf2-7 PE=3 SV=1 - [TF27_SCHPO]	42.09	4	38	38	121					311.812	24.61	23	23	682.985	38.18	33	40	320.01	23.03	21	25	409.565	30.01	28	33	1333	154.858	9.14404
	Sequence	# PSMs	# Proteins	# Protein Groups	Protein Group Accessions	Modifications	MH+ [Da]	q-Value	PEP	A2	IonScore A2	Exp Value A2	B2	IonScore B2	Exp Value B2	C2	IonScore C2	Exp Value C2	D2	IonScore D2	Exp Value D2	E2	IonScore E2	Exp Value E2	# Missed Cleavages
	SEISEIYDFLEDKR	4	4	1	P0CT42		1743.84	0	3.437e-06				High	83.31	4.29793e-07	High	53.53	0.000388601	High	44.66	0.00301113	High	63.88	3.31092e-05	1
	LIHPGIELLTNIILR	6	4	1	P0CT42		1715.06	0	2.147e-08				High	48.92	4.61639e-05	High	53.76	1.51462e-05	High	61.34	2.27699e-06	High	54.62	1.24252e-05	0
	LAPSFAGPFYVLQK	3	4	1	P0CT42		1537.84	0	4.707e-06				High	47.96	0.000527054	High	35.94	0.00851915				High	40.16	0.00321437	0
	WQLFLQDFNFEINYRPGSANHIADALSR	4	4	1	P0CT42		3322.63	0	2.258e-05				High	43.63	0.00929014	High	60.8	0.000188894	High	31.24	0.152692	High	34.37	0.077433	0
	HNSELNYATIDESDIGTILHILEHK	4	4	1	P0CT42		2862.43	0	2.744e-07				High	42.62	0.00963295	High	32.68	0.0956013	High	38.85	0.022838	High	24.6	0.614418	0
	MQAMNDEINQGLK	4	4	1	P0CT42		1491.7	0	5.658e-05				High	39.52	0.00667884	High	44.35	0.00211922	High	33.43	0.0271911	High	29.63	0.0632124	0
	LNISLNGISIK	4	4	1	P0CT42		1171.71	0	0.001509				High	38.29	0.00281678	High	25.94	0.0483898	High	24.28	0.0709175	High	39.81	0.00198497	0
	DQILLPNDTQLTR	2	4	1	P0CT42		1526.82	0	0.001577				High	34.57	0.0175443	High	45.59	0.00119395							0
	YISNLNPSTIMSGWTTLATALQADK	4	4	1	P0CT42		2696.37	0	0.0003203				High	34.4	0.0552242	High	42.53	0.00775436	High	17.76	2.48227	High	33.12	0.0709841	0
	ANVDDFHTR	3	4	1	P0CT42		1074.5	0	0.001948				High	31.98	0.0155932	High	35.17	0.00748058	High	36.03	0.00609928				0
	DITAETNTEK	4	4	1	P0CT42		1121.53	0	0.001139				High	28.61	0.0364272	High	43.47	0.00118967	High	30.21	0.0252967	High	16.9	0.54004	0
	NQVVTEYTNDTK	4	4	1	P0CT42		1411.67	0	2.342e-06				High	24.34	0.169155	High	19.66	0.495837	High	56.53	0.00011828	High	28.38	0.0670876	0
	WRPENLDGIQTSDEHLINLFAK	6	4	1	P0CT42		2596.31	0	1.371e-06				High	22.61	0.736062	High	44.36	0.00498538	High	30.82	0.114918	High	34.81	0.0446164	0
	QYTLNHLEELEQQFAER	4	4	1	P0CT42		2148.04	0	1.024e-05				High	21.88	0.793604	High	69.04	1.58418e-05	High	58.62	0.000174503	High	24.6	0.435328	0
	YVKPNIYPLPLIEQLLAK	3	4	1	P0CT42		2112.25	0	3.525e-05				High	20.32	0.0822135	High	16.08	0.22441				High	21.4	0.0666481	0
	WTPTQTQAIENIK	3	4	1	P0CT42		1529.8	0	4.491e-07				High	17.89	0.995649	High	17.38	1.10326	High	42.01	0.00379907				0
	AQLNYSVSDK	2	4	1	P0CT42		1124.56	0	0.0016				High	15.76	0.889293	High	33.78	0.0140296							0
	YSPALSPLELPSFSDK	4	4	1	P0CT42		1750.89	0	2.488e-05				High	13.88	3.23521	High	28.96	0.0990413	High	12.97	3.93131	High	19.4	0.866282	0
	IVDETEPIPK	2	4	1	P0CT42		1140.62	0	0.001053				High	11.62	1.1225							High	23.31	0.0706989	0
	LFILWMLPYSLR	2	4	1	P0CT42		1551.88	0	0.003094							High	55.85	4.8623e-05				High	41.58	0.00129275	0
	MFSENGSLTWQELLR	1	4	1	P0CT42	N5(Deamidated)	1811.86	0	4.054e-05							High	45.18	0.00278056							0
	MFSENGSLTWQELLR	1	4	1	P0CT42		1810.89	0	1.745e-05							High	43.8	0.0036747							0
	NQVVTEYTNDTK	1	4	1	P0CT42	N9(Deamidated)	1412.66	0	0.001614							High	41.46	0.00306519							0
	SGPNNYELDLPDSIK	3	4	1	P0CT42		1661.8	0	0.001052							High	40.6	0.00643207	High	24.41	0.280919	High	40.69	0.00645797	0
	QFLGSVNYLR	2	4	1	P0CT42		1196.64	0	0.0005805							High	38.85	0.00309502				High	38.87	0.00273705	0
	LNISLNGISIK	2	4	1	P0CT42	N6(Deamidated)	1172.69	0	0.0006326							High	36.65	0.00512564				High	30.48	0.0212201	0
	SVIYGGVYPNK	3	4	1	P0CT42		1196.63	0	0.00492							High	31.28	0.0219696	High	10.4	2.67675	High	24.24	0.104347	0
	NHKPYGPLQPIPPSERPWESLSMDFITALPESSGYNALFVVVDR	2	4	1	P0CT42	N1(Deamidated)	4955.45	0	0.001366							High	30.73	0.202022							0
	YEMVLQAELPDFK	2	4	1	P0CT42		1582.78	0	0.003596							High	28.87	0.0905431				High	16.95	1.43607	0
	VIAYFGNPK	3	4	1	P0CT42		1008.55	0	0.004957							High	26.43	0.0499384	High	21.96	0.139458	High	30.39	0.020339	0
	GVFEYLVMPYGISIAPAHFQYFINTILGEVK	1	2	1	P0CT42	Q20(Deamidated)	3517.83	0	0.0002614							High	25.63	0.327001							0
	FDPNKDVESYISK	3	4	1	P0CT42		1541.75	0	0.006037							High	21.06	0.456348	High	14.58	2.00294	High	41.88	0.00372965	1
	GLEFEVELTQENYR	2	4	1	P0CT42		1726.83	0	0.0008913							High	20.39	0.718493				High	21.24	0.591527	0
	HNSELNYATIDESDIGTILHILEHK	1	4	1	P0CT42	N6(Deamidated)	2863.43	0	0.0002776							High	19.85	1.8586							0
	NANLIINQAK	2	4	1	P0CT42		1098.63	0	0.002336							High	17.55	0.300605				High	23.1	0.0837522	0
	WQLFLQDFNFEINYRPGSANHIADALSR	5	4	1	P0CT42	N20(Deamidated)	3323.64	0	0.0008946										High	40.67	0.0191805	High	47.39	0.00396424	0
	HYLESTIEPFK	1	4	1	P0CT42		1363.69	0	0.002095										High	16.06	1.17058				0
	WRPENLDGIQTSDEHLINLFAK	1	4	1	P0CT42	N18(Deamidated)	2597.32	0	0.004479													High	23.37	0.649882	0
	AIVNDYIK	2	4	1	P0CT42		935.518	0.001	0.01543				High	29.67	0.0164539							High	14.05	0.600164	0
	VEENIQLK	3	4	1	P0CT42		972.535	0.001	0.01858				High	13.34	1.01031	High	18.59	0.301617	High	13.49	0.976015				0
	EQVLYLNVK	2	4	1	P0CT42		1105.62	0.001	0.02893							High	37.73	0.00270692				High	27.96	0.0256729	0
	EIIADNDHIFTSQTWK	1	4	1	P0CT42		1917.94	0.001	0.02432													High	18.37	1.4984	0
	MVVDYKPLNK	4	4	1	P0CT42		1206.66	0.003	0.0606				High	29.22	0.0465532	High	32.47	0.0220267	High	19.68	0.418745	High	10.22	3.69785	0
	TEFLVVK	1	4	1	P0CT42		835.492	0.005	0.07311				High	16.76	0.130735										0
P22774	Heat shock 70 kDa protein, mitochondrial OS=Schizosaccharomyces pombe (strain 972 / ATCC 24843) GN=ssp1 PE=2 SV=2 - [HSP7M_SCHPO]	50	1	27	27	115	264.007	23.15	11	11	855.217	45.7	23	27	677.808	44.21	23	29	616.294	46.59	21	25	686.921	45.7	21	23	674	72.9319	7.1665
	Sequence	# PSMs	# Proteins	# Protein Groups	Protein Group Accessions	Modifications	MH+ [Da]	q-Value	PEP	A2	IonScore A2	Exp Value A2	B2	IonScore B2	Exp Value B2	C2	IonScore C2	Exp Value C2	D2	IonScore D2	Exp Value D2	E2	IonScore E2	Exp Value E2	# Missed Cleavages
	TYSPSQIGGFILSK	1	1	1	P22774		1497.8	0	0.0008787	High	61.87	2.63953e-05													0
	AAGAIAGLNVLR	5	1	1	P22774		1125.67	0	1.595e-05	High	55.63	2.57115e-05	High	58.09	1.45924e-05	High	51.21	7.11423e-05	High	54.83	3.09121e-05	High	49.45	0.000106691	0
	QAVINPENTFFATK	5	1	1	P22774		1579.81	0	0.004311	High	53.56	0.000271602	High	41.3	0.00451087	High	45.4	0.0018775	High	43.77	0.00279979	High	27.58	0.0987262	0
	SVNPDEAVAIGAAIQGGVLSGHVK	5	1	1	P22774		2289.22	0	1.257e-15	High	48.91	0.0009871	High	56.13	0.000189052	High	49.52	0.00083318	High	73.2	3.65673e-06	High	42.16	0.00456709	0
	ETASTYLGK	5	1	1	P22774		969.488	0	0.001252	High	45.85	0.000280817	High	52.51	7.37778e-05	High	36.84	0.0022668	High	53.07	5.40025e-05	High	52.53	6.11525e-05	0
	TTPSVVAFTK	5	1	1	P22774		1050.58	0	0.0005703	High	43.82	0.000811235	High	33.34	0.0091299	High	34.07	0.00771731	High	48.94	0.000251458	High	48.25	0.000273063	0
	TDISLPFITADATGPK	5	1	1	P22774		1646.86	0	1.212e-06	High	27.33	0.102172	High	64.9	1.78624e-05	High	63.17	2.84831e-05	High	55.1	0.000171511	High	62.45	3.41881e-05	0
	DLVLLDVTPLSLGIETLGGVFTR	9	1	1	P22774		2428.37	0	5.726e-09	High	25.57	0.0669757	High	104.49	8.51737e-10	High	94.48	9.10733e-09	High	91.98	1.52129e-08	High	115.29	6.9957e-11	0
	DKLDQQAVEDLR	7	1	1	P22774		1429.73	0	0.0006262	High	20.71	0.413126	High	44.4	0.00176456	High	23.52	0.218092	High	29.03	0.0728276	High	30.33	0.0463878	1
	LIGNFQLTGIAPAPK	5	1	1	P22774		1539.89	0	2.113e-06	High	20	0.238	High	53.27	0.000112328	High	40.59	0.00195109	High	33.71	0.0102782	High	42.95	0.00120917	0
	DANLQTSEINEVILVGGMTR	7	1	1	P22774		2160.1	0	2.174e-07				High	99.13	1.30794e-08	High	91.64	7.42384e-08	High	57.91	0.000176533	High	37.96	0.0176991	0
	SQVFSTAADGQTAVEIR	4	1	1	P22774		1779.89	0	4.751e-09				High	94.33	3.23778e-08	High	50.5	0.000770932	High	30.25	0.0785459	High	114.42	3.17137e-10	0
	VNAGDEGITSEDMK	2	1	1	P22774		1465.65	0	9.219e-07				High	74.44	1.5847e-06				High	32.42	0.0247161				0
	KIDEIQQLSLK	3	1	1	P22774		1314.76	0	8.567e-05				High	56.38	5.46592e-05				High	18.93	0.307052	High	14.47	0.848523	1
	LDQQAVEDLR	2	1	1	P22774		1186.61	0	0.0003883				High	54.72	9.32599e-05	High	35.96	0.00700963							0
	VVNEPTAAALAYGLDK	2	1	1	P22774		1631.86	0	4.943e-06				High	54.36	0.000199708							High	76.27	1.29826e-06	0
	VVNEPTAAALAYGLDKK	3	1	1	P22774		1759.96	0	8.943e-07				High	48.94	0.000656728	High	33.73	0.0216693	High	50.63	0.00039702				1
	NAVVTVPAYFNDSQR	6	1	1	P22774		1680.83	0	5.262e-05				High	41.5	0.00537685	High	42.19	0.00473798	High	38.18	0.0122404	High	41.64	0.00521999	0
	STNGDTHLGGEDFDVALVR	4	1	1	P22774	N3(Deamidated)	2003.93	0	2.13e-12				High	40.09	0.0104805	High	47.19	0.00205118	High	55.54	0.000298802	High	51.04	0.000852371	0
	KNDAIVAVFDLGGGTFDISILELNNGVFEVR	4	1	1	P22774		3322.72	0	1.717e-05				High	39.09	0.0127318	High	58.43	0.000173838	High	56.91	0.000215315	High	18.2	1.68686	1
	KSQVFSTAADGQTAVEIR	2	1	1	P22774		1907.98	0	9.638e-05				High	23.98	0.351751	High	28.48	0.129063							1
	HINMEISR	4	1	1	P22774		999.504	0	0.008453				High	23.91	0.0599504	High	25.35	0.043032	High	22.73	0.0786669	High	36.79	0.00308882	0
	IVEHSNGDAWLEAR	3	1	1	P22774		1596.78	0	0.0008005				High	21.02	0.536871	High	19.89	0.739495	High	25.64	0.196896				0
	STNGDTHLGGEDFDVALVR	1	1	1	P22774		2002.95	0	3.456e-06							High	53.42	0.000503672							0
	NDAIVAVFDLGGGTFDISILELNNGVFEVR	1	1	1	P22774		3194.63	0	2.851e-06							High	41.58	0.0105435							0
	KNDAIVAVFDLGGGTFDISILELNNGVFEVR	3	1	1	P22774	N24(Deamidated)	3323.73	0	0.0008157							High	34.04	0.0434889	High	23.89	0.466913	High	37.62	0.0195469	1
	NEGLDLSK	2	1	1	P22774		875.447	0	0.001269							High	18.41	0.343945				High	40.02	0.00237404	0
	VFESVYK	4	1	1	P22774		871.456	0.001	0.022				High	15.13	0.211763	High	23.37	0.0317577	High	11.25	0.517427	High	29.96	0.00696384	0
	LVDPLVR	4	1	1	P22774		811.504	0.002	0.04064	High	26.66	0.00733633				High	21.87	0.0221044	High	24.1	0.0132275	High	32.31	0.00199746	0
	IVEHSNGDAWLEAR	2	1	1	P22774	N6(Deamidated)	1597.76	0.002	0.02252							High	17.03	1.20378				High	10.33	5.76488	0
P36620	Acetolactate synthase, mitochondrial OS=Schizosaccharomyces pombe (strain 972 / ATCC 24843) GN=ilv1 PE=3 SV=2 - [ILVB_SCHPO]	50.67	1	24	24	115	310.14	30.34	13	13	527.037	42.15	19	24	667.025	44.39	21	33	374.934	34.08	16	18	466.358	44.84	20	27	669	73.1474	9.29053
	Sequence	# PSMs	# Proteins	# Protein Groups	Protein Group Accessions	Modifications	MH+ [Da]	q-Value	PEP	A2	IonScore A2	Exp Value A2	B2	IonScore B2	Exp Value B2	C2	IonScore C2	Exp Value C2	D2	IonScore D2	Exp Value D2	E2	IonScore E2	Exp Value E2	# Missed Cleavages
	LQIPVTTSLLGLGAVDER	6	1	1	P36620		1882.07	0	3.851e-09	High	56.5	7.26465e-05	High	72.53	1.59443e-06	High	103.58	1.34848e-09	High	68.77	4.3074e-06	High	61.4	2.06464e-05	0
	EPIPILSSVPSMNR	6	1	1	P36620		1539.82	0	9.347e-06	High	53.1	0.000190034	High	54.05	0.000152304	High	54.37	0.00015355	High	40.54	0.00342635	High	57.38	7.58662e-05	0
	STSTVTTASPIK	5	1	1	P36620		1192.64	0	0.01012	High	52.47	0.000151752	High	30.01	0.0267882	High	42.93	0.00136501	High	36.5	0.00599977	High	46.56	0.000591745	0
	VTGNVSLFAPQAR	5	1	1	P36620		1359.74	0	7.549e-07	High	52.29	0.000202734	High	32.9	0.021053	High	12.92	2.05734	High	63.49	1.58267e-05	High	63.12	1.72341e-05	0
	VTITTGVGAHQMWAATFYR	6	1	1	P36620		2110.05	0	2.625e-11	High	51.62	0.000740301	High	121.87	6.94664e-11	High	77.78	1.79062e-06	High	50.22	0.00103188	High	33.88	0.0439955	0
	GPVLMEVLVAQK	3	1	1	P36620		1283.74	0	5.653e-05	High	46.45	0.000546912	High	48.71	0.000318296							High	34.93	0.00760031	0
	VVQPTEAIEGDVYESLK	6	1	1	P36620		1876.95	0	5.117e-06	High	42.89	0.0044619	High	56.63	0.000193153	High	35.98	0.021601	High	14.57	3.06196	High	48.36	0.00127354	0
	LADAMGIK	1	1	1	P36620		818.444	0	0.06034	High	42.15	0.00102097													0
	HVFGYPGGAILPVFDAIYR	6	1	1	P36620		2092.1	0	1.099e-12	High	34.34	0.029211	High	36.4	0.0184529	High	34.34	0.0289533	High	41.94	0.00511468	High	35.17	0.0244031	0
	SPHFEFILPR	5	1	1	P36620		1242.66	0	0.001282	High	31.08	0.02745	High	33.19	0.0168866	High	36.8	0.00675887				High	18.49	0.499067	0
	GGIIHFDISPK	5	1	1	P36620		1183.65	0	0.0007516	High	25.34	0.0485409	High	27.28	0.0311469	High	45.17	0.000506307	High	24.94	0.0559494	High	33.65	0.00759474	0
	SDLSLHMLGMHGSGYANMAMQEADLILALGVR	8	1	1	P36620		3401.65	0	2.603e-09	High	19.91	2.59472	High	66.65	5.58955e-05	High	77.03	5.03605e-06	High	61.51	0.000177462	High	55.74	0.000676049	0
	SAPGELVKPQEVIQELDK	3	1	1	P36620		1980.06	0	6.773e-06	High	13.31	2.54096				High	31.35	0.0373008				High	17.92	0.809601	0
	FDWLSQIQTWK	5	1	1	P36620		1451.73	0	9.404e-06				High	80.33	6.52488e-07	High	50.18	0.000619773	High	50.16	0.0005436	High	51.84	0.000448753	0
	ILILNNEEQGMVTQWQNLFYEK	4	1	1	P36620		2710.36	0	1.083e-06				High	39.85	0.0165364				High	23.88	0.65318	High	10.38	14.5816	0
	WTKPSSLVTSGGLGTMGFGLPAAIGASVAAPK	3	1	1	P36620		3029.61	0	6.952e-06				High	33.84	0.0320731	High	28.96	0.101837				High	15.42	2.08993	0
	EHVYPFVPGGK	6	1	1	P36620		1229.63	0	0.002736				High	31.89	0.0236207	High	44.1	0.00142001	High	19.78	0.435512	High	27.94	0.0665274	0
	DKVTITTGVGAHQMWAATFYR	6	1	1	P36620		2353.18	0	0.0002603				High	20.29	1.24736	High	31.39	0.0968262	High	11.63	8.92158	High	49.95	0.00130544	1
	TGGEIFHDMMLK	6	1	1	P36620		1378.65	0	0.0002448				High	18.5	0.574197	High	45.36	0.00120504	High	32.61	0.0228906	High	20.07	0.410825	0
	SDLSLHMLGMHGSGYANMAMQEADLILALGVR	3	1	1	P36620	N17(Deamidated)	3402.65	0	1.628e-17							High	54.36	0.000932767	High	67.62	4.25362e-05				0
	DKVTITTGVGAHQMWAATFYR	1	1	1	P36620	Q13(Deamidated)	2354.17	0	0.0001409							High	44.44	0.00496454							1
	DVTASVLKEPIPILSSVPSMNR	2	1	1	P36620		2353.28	0	0.002354							High	19.44	0.558575				High	26.33	0.131537	1
	ILILNNEEQGMVTQWQNLFYEK	1	1	1	P36620	Q16(Deamidated)	2711.35	0	0.001161										High	16.8	3.54867				0
	SDLSLHMLGMHGSGYANMAMQEADLILALGVR	2	1	1	P36620	M10(Oxidation)	3417.64	0	1.569e-05													High	31.66	0.186688	0
	FPFTFTR	4	1	1	P36620		915.472	0.001	0.01232				High	27.15	0.0356592	High	23.22	0.0881397	High	36.26	0.00437695	High	34.97	0.00589077	0
	SDLSLHMLGMHGSGYANMAMQEADLILALGVR	2	1	1	P36620	M20(Oxidation); Q21(Deamidated)	3418.65	0.001	0.008538							High	20.31	2.4665							0
	YDSSFVGK	1	1	1	P36620		902.425	0.001	0.009212							High	18.47	0.120898							0
	DVTASVLK	3	1	1	P36620		832.477	0.005	0.07988				High	13.59	0.680347	High	21.01	0.175143	High	12.55	0.858872				0
	RIDEAFEIATSGRPGPVLVDLPK	1	1	1	P36620		2480.35	0.006	0.08459							High	19.3	0.634445							1
O74976	Putative peroxisomal-coenzyme A synthetase OS=Schizosaccharomyces pombe (strain 972 / ATCC 24843) GN=SPCC1827.03c PE=1 SV=1 - [FAT2_SCHPO]	51.37	1	18	18	106	35.29	9.18	3	3	634.46	50.2	17	29	654.194	48.44	16	26	672.293	50.2	17	28	451.91	44.34	14	20	512	56.2386	9.29053
	Sequence	# PSMs	# Proteins	# Protein Groups	Protein Group Accessions	Modifications	MH+ [Da]	q-Value	PEP	A2	IonScore A2	Exp Value A2	B2	IonScore B2	Exp Value B2	C2	IonScore C2	Exp Value C2	D2	IonScore D2	Exp Value D2	E2	IonScore E2	Exp Value E2	# Missed Cleavages
	IAIMDLQR	5	1	1	O74976		959.534	0	0.008021	High	32.94	0.00711423	High	42.17	0.00146527	High	38.27	0.00359681	High	34.45	0.00866796	High	37.89	0.00227577	0
	LVIVPEGSVAANTPAVR	9	1	1	O74976		1692.96	0	7.229e-07	High	21.02	0.138369	High	63.86	7.81184e-06	High	97.79	3.39336e-09	High	51.47	0.000144709	High	54.58	6.40941e-05	0
	EFIQYGATWYTAVPTIHQILLR	6	1	1	O74976		2620.39	0	8.355e-17	High	17.33	1.27784	High	31.1	0.0525907	High	37.21	0.0141535	High	90.91	6.22818e-08	High	39.64	0.00792004	0
	ALVAPSLNAELSFSELR	7	1	1	O74976		1816.98	0	1.241e-08				High	120.63	4.8049e-11	High	91.13	4.35946e-08	High	102.44	3.15871e-09	High	100.79	4.67278e-09	0
	VGDPVNIAIPNGLEFVVAFYAVSWQR	6	1	1	O74976		2861.5	0	2.706e-17				High	72.72	5.27882e-06	High	75.14	3.11861e-06	High	83.99	4.13789e-07	High	64.25	3.43891e-05	0
	VGDPVNIAIPNGLEFVVAFYAVSWQR	6	1	1	O74976	N11(Deamidated)	2862.48	0	4.775e-06				High	67.5	2.08059e-05	High	44.62	0.00388459	High	38.72	0.0155694	High	25.85	0.301358	0
	SFTTLYSAIQGDASAR	8	1	1	O74976	N-Term(Acetyl)	1729.84	0	7.52e-14				High	57.08	0.000168559	High	60.83	6.59178e-05	High	81.65	5.82693e-07	High	65.77	2.33333e-05	0
	INAPQPLGLPQPDDVMLVLHTSGTTGRPK	4	1	1	O74976		3052.62	0	1.472e-07				High	55.27	0.000233722	High	38.43	0.0110461	High	35.1	0.0237798	High	33.41	0.0358673	0
	GYLNNPAANK	5	1	1	O74976		1061.54	0	0.000413				High	52.5	0.000152957	High	48.72	0.000357175	High	48.37	0.000395885	High	48.12	0.000431676	0
	LDKDGYVFITGR	5	1	1	O74976		1383.73	0	0.0007561				High	51.26	0.000231933	High	42.79	0.00163328	High	34.78	0.0103291	High	45.12	0.000955128	1
	QSEFEFYIDDLK	4	1	1	O74976		1533.71	0	4.988e-05				High	46.01	0.0014761	High	61.51	4.48158e-05	High	38.86	0.00825608	High	50.26	0.000610344	0
	YGQDIQAAINPVAGK	3	1	1	O74976		1544.81	0	2.132e-07				High	39.04	0.00711632	High	80.44	5.27279e-07	High	37.12	0.0106361				0
	QLHDYLEQK	2	1	1	O74976		1173.59	0	0.001167				High	35.5	0.00887791				High	32.37	0.018252				0
	QIASLGIK	4	1	1	O74976		829.515	0	0.006098				High	34.31	0.00693173	High	30.49	0.0167048	High	33.07	0.00922235	High	34.51	0.00661975	0
	DGYVFITGR	5	1	1	O74976		1027.52	0	0.00434				High	31.89	0.0112279	High	36.44	0.00402901	High	32.04	0.0110968	High	34.43	0.00638224	0
	SIHNITTSYR	7	1	1	O74976		1191.61	0	0.001589				High	28.2	0.0538071	High	25.29	0.0896278	High	37.52	0.0065317	High	27.71	0.0625211	0
	GYLNNPAANK	4	1	1	O74976	N9(Deamidated)	1062.52	0	0.00337				High	25.88	0.0618451				High	14.57	0.864122				0
	VGDPVNIAIPNGLEFVVAFYAVSWQR	1	1	1	O74976	N6(Deamidated); N11(Deamidated)	2863.49	0	7.964e-05				High	24.59	0.387329										0
	APVLEAYAMTEASHQMTTNPLPPLVHKPHSVGKPFGVELK	7	1	1	O74976		4322.25	0	2.115e-07				High	24.43	0.39285	High	31.84	0.0741048	High	45.89	0.00262141	High	18.37	1.61192	0
	APVLEAYAMTEASHQMTTNPLPPLVHKPHSVGKPFGVELK	2	1	1	O74976	Q15(Deamidated)	4323.25	0	0.0003431				High	11.08	8.30909							High	19.5	1.21683	0
	INAPQPLGLPQPDDVMLVLHTSGTTGRPK	2	1	1	O74976	Q11(Deamidated)	3053.62	0	3.635e-05							High	51.18	0.000649672							0
	LEATFR	2	1	1	O74976		736.399	0.004	0.02899				High	27.52	0.0261976				High	24.68	0.0503804				0
	EFIQYGATWYTAVPTIHQILLR	1	1	1	O74976	Q18(Deamidated)	2621.39	0.005	0.07926				High	12.31	4.5736										0
	FYFTDR	1	1	1	O74976		848.394	0.008	0.1107							High	23.03	0.0447963							0
P78958	Glyceraldehyde-3-phosphate dehydrogenase 1 OS=Schizosaccharomyces pombe (strain 972 / ATCC 24843) GN=tdh1 PE=1 SV=1 - [G3P1_SCHPO]	65.48	1	11	20	156	533.22	47.62	14	22	743.001	63.39	17	38	643.636	63.39	18	39	478.654	54.17	15	23	577.824	63.69	19	34	336	35.8473	6.69775
	Sequence	# PSMs	# Proteins	# Protein Groups	Protein Group Accessions	Modifications	MH+ [Da]	q-Value	PEP	A2	IonScore A2	Exp Value A2	B2	IonScore B2	Exp Value B2	C2	IonScore C2	Exp Value C2	D2	IonScore D2	Exp Value D2	E2	IonScore E2	Exp Value E2	# Missed Cleavages
	VINDTFGIEEGLMTTVHATTATQK	8	2	2	P78958;O43026		2577.28	0	5.516e-10	High	79.36	1.8158e-06	High	92.02	9.5088e-08	High	26.03	0.388907	High	70.08	1.533e-05	High	56.81	0.000325076	0
	VPTPDVSVVDLTVK	11	2	2	P78958;O43026		1468.83	0	4.107e-08	High	69.98	2.58689e-06	High	76.83	5.49852e-07	High	70.61	2.23757e-06	High	66.16	6.41573e-06	High	63	1.32815e-05	0
	LVIDGNAIDVHNER	13	1	1	P78958		1564.81	0	3.869e-06	High	65.19	1.66178e-05	High	53.56	0.000241865	High	75.77	1.64472e-06	High	55.29	0.000169494	High	58.42	8.31626e-05	0
	RVVDLVAYTAAK	7	1	1	P78958		1305.75	0	5.976e-06	High	60.44	1.21541e-05	High	60.09	1.23905e-05	High	58.21	2.03106e-05	High	74.74	4.51567e-07	High	62.24	8.03012e-06	1
	WSTSGADYVIESTGVFTTQETASAHLK	5	1	1	P78958		2886.38	0	8.98e-09	High	58.68	0.000305392	High	60.5	0.000203517	High	70.02	2.22573e-05	High	37.73	0.0388835	High	27.05	0.443203	0
	WSTSGADYVIESTGVFTTQETASAHLK	1	1	1	P78958	Q19(Deamidated)	2887.38	0	0.0009918	High	52.67	0.00120886													0
	VIISAPSK	5	2	2	P78958;O43026		814.504	0	0.002543	High	45.43	0.00041101	High	43.32	0.000668116	High	48.56	0.000199918	High	35.09	0.0044448	High	42.3	0.000844991	0
	VGINGFGR	5	2	2	P78958;O43026		819.447	0	0.003406	High	40	0.001045	High	53.14	5.07126e-05	High	53.2	5.00168e-05	High	35.88	0.00269846	High	41.43	0.000751824	0
	VVDLVAYTAAK	5	1	1	P78958		1149.65	0	3.467e-06	High	39.97	0.00125363	High	44.49	0.000442761	High	32.07	0.00772982	High	46.31	0.000291185	High	36.79	0.00260717	0
	VGINGFGR	9	2	2	P78958;O43026	N4(Deamidated)	820.431	0	0.00302	High	36.25	0.00322507	High	34.25	0.00511139	High	50.82	0.0001126	High	22.88	0.0700711	High	25.96	0.0344777	0
	LVSWYDNEWGYSR	5	1	1	P78958		1674.75	0	8.849e-07	High	34.93	0.0208727	High	41.94	0.00420306	High	15.97	1.65416	High	47.11	0.00125378	High	47.01	0.00130986	0
	RVIISAPSK	4	2	2	P78958;O43026		970.604	0	0.002074	High	34.4	0.00481078				High	22.88	0.0682678	High	27.19	0.0253056	High	28.31	0.0194055	1
	LTGMAFR	2	2	2	P78958;O43026		795.419	0	0.1172	High	29.42	0.00708585	High	23.87	0.0254327										0
	VIPALNGK	9	2	2	P78958;O43026	N6(Deamidated)	812.488	0	0.008727	High	23.76	0.0128322	High	28.99	0.00384857	High	25.72	0.00817146	High	28.16	0.00465908	High	28.54	0.00426874	0
	DAPMYVVGVNEEK	5	1	1	P78958	M4(Oxidation)	1466.68	0	0.0008935	High	21.42	0.365962	High	31.11	0.0405818	High	19.76	0.541619	High	20.57	0.452532	High	35.04	0.0160424	0
	LAKPTNYEDIK	7	2	2	P78958;O43026		1291.69	0	0.001651	High	19.87	0.300873	High	17.95	0.468148	High	16.14	0.710204	High	24.69	0.0991706	High	26.45	0.0660144	0
	VINDTFGIEEGLMTTVHATTATQK	7	2	2	P78958;O43026	N3(Deamidated)	2578.27	0	1.228e-07				High	67.02	3.29096e-05	High	33.87	0.0648533	High	45.87	0.00420843	High	55.83	0.000430745	0
	TIQVVAINDPFIDLEYMAYMFK	7	1	1	P78958		2621.31	0	3.498e-06				High	55.03	0.000496514	High	52.8	0.000773829	High	36.12	0.0386306				0
	DAPMYVVGVNEEK	5	1	1	P78958		1450.69	0	6.495e-06				High	47.84	0.000809031	High	45.51	0.00138346	High	37.98	0.00787347	High	58.41	7.58553e-05	0
	LTGMAFR	4	2	2	P78958;O43026	M4(Oxidation)	811.413	0	0.003672				High	41.3	0.000570809				High	28.02	0.0149873	High	33.13	0.00374534	0
	TIQVVAINDPFIDLEYMAYMFK	2	1	1	P78958	N8(Deamidated); M20(Oxidation)	2638.29	0	0.0005026				High	37.14	0.0332105							High	32.36	0.0991074	0
	GASANIIPSSTGAAK	3	2	2	P78958;O43026		1344.71	0	1.931e-06				High	30.06	0.0424593	High	25.92	0.101064				High	46.36	0.000995344	0
	TIQVVAINDPFIDLEYMAYMFK	6	1	1	P78958	M20(Oxidation)	2637.3	0	0.0003396				High	27.49	0.306302	High	19.93	1.79825	High	25.51	0.479007	High	14.92	5.68358	0
	FDGSVEIKDGK	4	1	1	P78958		1194.6	0	0.0003578				High	24.95	0.109082	High	50.34	0.000315784				High	30.69	0.0289627	1
	DAPMYVVGVNEEKFNPSEK	4	1	1	P78958		2153.02	0	2.242e-05				High	19.04	1.61973	High	37.27	0.0243562				High	13.33	5.84128	1
	TIQVVAINDPFIDLEYMAYMFK	1	1	1	P78958	N8(Deamidated)	2622.3	0	0.001061				High	14.03	6.27645										0
	LVIDGNAIDVHNER	1	1	1	P78958	N6(Deamidated)	1565.79	0	0.0002506							High	33.84	0.0281492							0
	LVSWYDNEWGYSR	2	1	1	P78958	N7(Deamidated)	1675.74	0	0.001483							High	33.6	0.0264092				High	19.94	0.648396	0
	LVIDGNAIDVHNERDPADIK	1	1	1	P78958	N6(Deamidated)	2205.11	0	0.002474							High	22	0.703202							1
	DAPMYVVGVNEEK	1	1	1	P78958	N10(Deamidated)	1451.67	0	0.001403							High	21.98	0.298553							0
	VINDTFGIEEGLMTTVHATTATQK	1	2	2	P78958;O43026	M13(Oxidation)	2593.28	0	6.288e-05													High	33.25	0.0770054	0
	VIPALNGK	5	2	2	P78958;O43026		811.504	0.001	0.1248	High	26.53	0.00755925	High	21.62	0.0234142	High	26.58	0.00747272	High	23.15	0.0164619	High	22.48	0.0192079	0
	FDGSVEIK	1	1	1	P78958		894.457	0.001	0.02752													High	16.19	0.400326	0
O59838	Heat shock protein homolog pss1 OS=Schizosaccharomyces pombe (strain 972 / ATCC 24843) GN=pss1 PE=1 SV=2 - [HSP7F_SCHPO]	57.22	1	32	32	99	70.97	3.47	2	2	395.964	37.22	21	21	642.166	49.44	28	30	443.164	38.61	22	22	483.414	42.36	23	24	720	80.3255	5.07178
	Sequence	# PSMs	# Proteins	# Protein Groups	Protein Group Accessions	Modifications	MH+ [Da]	q-Value	PEP	A2	IonScore A2	Exp Value A2	B2	IonScore B2	Exp Value B2	C2	IonScore C2	Exp Value C2	D2	IonScore D2	Exp Value D2	E2	IonScore E2	Exp Value E2	# Missed Cleavages
	NALEEYIYDTR	5	1	1	O59838		1386.66	0	1.715e-05	High	45.76	0.00118926	High	44.56	0.00143478	High	33.13	0.0214019	High	63.83	1.66428e-05	High	42.18	0.00269074	0
	GLSFTLNQDEAVAR	5	1	1	O59838		1520.77	0	5.399e-06	High	42.21	0.00333952	High	51.44	0.000430677	High	16.14	1.39852	High	53.75	0.000250277	High	71.02	4.66105e-06	0
	ALLEAANIAGLNPLR	5	1	1	O59838		1535.89	0	1.59e-07				High	81.81	7.54754e-08	High	108.42	1.93518e-10	High	81.14	1.03448e-07	High	91.69	7.5557e-09	0
	AIDVIVNEVSNR	4	1	1	O59838		1328.72	0	7.114e-06				High	57.89	5.99827e-05	High	44.48	0.00123154	High	45.93	0.000883235	High	38.07	0.00456169	0
	LTEVDGFVGAK	4	1	1	O59838		1135.6	0	0.0009019				High	54.76	7.95384e-05	High	54.49	8.41068e-05	High	41.95	0.00148396	High	57.34	4.39114e-05	0
	AIAEAELIGSVSDVVISIPAWFTDIQR	5	1	1	O59838		2900.54	0	1.744e-08				High	53.95	0.000320965	High	87.42	1.44998e-07	High	69.13	1.04403e-05	High	61.04	6.48526e-05	0
	ALIDYFAAEFK	4	1	1	O59838		1287.66	0	0.0001152				High	45.04	0.00150711	High	49.21	0.000445614	High	51.15	0.000332268	High	53.38	0.000220874	0
	ALELAGIK	4	1	1	O59838		814.505	0	0.004888				High	42.84	0.000746194	High	35.81	0.00376575	High	27.99	0.0227956	High	36.92	0.00291643	0
	VAIVDFGHSNYSVSIVEFSR	3	1	1	O59838		2226.12	0	6.024e-09				High	33.85	0.0513267	High	50.52	0.00106015				High	78.45	1.7261e-06	0
	TNVVGIDFGNSK	4	1	1	O59838		1250.64	0	2.573e-05				High	33	0.0187945	High	56.81	7.44163e-05	High	17.68	0.635516	High	52.16	0.00022653	0
	VLSANANAPLNVEMIMNDIDASSFIK	4	1	1	O59838		2777.39	0	6.672e-07				High	29.78	0.180727	High	41.43	0.0120004	High	29.32	0.204487	High	30.44	0.16094	0
	TDLPEPESPR	3	1	1	O59838		1140.55	0	0.00167				High	27.76	0.0602142	High	21.34	0.231005				High	17.59	0.546927	0
	VQYLNEETAFSNIQLIAAYFTK	3	1	1	O59838		2563.31	0	0.001135				High	27.65	0.231316				High	16.14	3.489	High	13.22	6.1007	0
	LVAETVDR	4	1	1	O59838		902.494	0	0.002491				High	24.86	0.0867091	High	51.95	0.000169459	High	29.1	0.0326636	High	24.48	0.103014	0
	EAQLPGSIK	2	1	1	O59838		942.525	0	0.0005659				High	23.61	0.0470353	High	33.68	0.00512115							0
	LPTEVLEK	4	1	1	O59838		928.535	0	0.002099				High	22.4	0.0710668	High	19.64	0.134174	High	29.36	0.0154117	High	19.15	0.149591	0
	AEDWLYEEGEDTTK	4	1	1	O59838		1685.72	0	5.697e-06				High	22.34	0.31506	High	26.26	0.13048	High	41.61	0.00374455	High	12.9	2.80279	0
	LMNDNAAAALTYGITK	3	1	1	O59838		1666.85	0	7.302e-08							High	74.49	2.38629e-06	High	57.49	0.000124232	High	23.12	0.345658	0
	VADLSVSVQEDR	3	1	1	O59838		1317.66	0	2.972e-05							High	43.45	0.00210113	High	57.43	8.72865e-05	High	32.96	0.0243555	0
	LDDIYAPFTNEEESSK	2	1	1	O59838		1857.84	0	2.209e-05							High	25.7	0.23376				High	25.51	0.258132	0
	EFHVHDVTTYPITFSWEPIPENPEEDSSLEVFSEGNPIPSTK	2	1	1	O59838	N22(Deamidated)	4802.26	0	0.001508							High	20.69	3.24434							0
	QNIAQYLINDVVPNK	1	1	1	O59838		1728.93	0	0.0005758							High	14.37	2.0912							0
	SDFEELIKPLLER	1	1	1	O59838		1588.86	0	8.076e-08										High	32.12	0.0332659				0
	LLAAYSK	4	1	1	O59838		765.451	0.001	0.008259				High	28.55	0.00886694	High	32.8	0.00333253	High	30.96	0.00509066	High	31.97	0.00403435	0
	DGDLSIVK	3	1	1	O59838		846.457	0.001	0.008875				High	22.27	0.128072	High	28.15	0.033837	High	17.68	0.369367				0
	YLDAEEAK	2	1	1	O59838		938.446	0.001	0.005783							High	26.79	0.0299458				High	12.18	0.880771	0
	TVIAVAR	2	1	1	O59838		729.462	0.001	0.0103							High	22.67	0.138974	High	27.12	0.0498808				0
	AKLDDIYAPFTNEEESSK	1	1	1	O59838		2056.97	0.001	0.006315							High	21.25	0.832383							1
	STPSLVSYGER	1	1	1	O59838		1195.6	0.001	0.01671													High	32.59	0.0178186	0
	ILTFYR	4	1	1	O59838		812.466	0.004	0.03302				High	31.09	0.00490163	High	24.93	0.0202461	High	29.22	0.00753947	High	28.63	0.00863656	0
	YKIDVLSNPK	1	1	1	O59838		1176.66	0.004	0.02682										High	22.59	0.0906079				1
	YLDAEEAKR	2	1	1	O59838		1094.55	0.006	0.08455				High	20.99	0.213769	High	34.24	0.0100392							1
Q10475	Eukaryotic translation initiation factor 4 gamma OS=Schizosaccharomyces pombe (strain 972 / ATCC 24843) GN=tif471 PE=1 SV=1 - [IF4G_SCHPO]	37.85	1	39	39	192					1526.46	37.85	38	70	624.431	30.36	29	39	1176.07	34.35	36	58	445.115	22.81	23	25	1403	153.942	9.23193
	Sequence	# PSMs	# Proteins	# Protein Groups	Protein Group Accessions	Modifications	MH+ [Da]	q-Value	PEP	A2	IonScore A2	Exp Value A2	B2	IonScore B2	Exp Value B2	C2	IonScore C2	Exp Value C2	D2	IonScore D2	Exp Value D2	E2	IonScore E2	Exp Value E2	# Missed Cleavages
	LLMTVGVNIDATEK	8	1	1	Q10475		1503.81	0	2.492e-13				High	92.51	2.77158e-08	High	88.09	6.98574e-08	High	107.15	9.52197e-10	High	70.53	4.46098e-06	0
	SGSQVSDQVVESPNSSTLSPR	5	1	1	Q10475		2161.04	0	3.408e-08				High	84.07	4.87915e-07	High	62.62	6.91702e-05	High	73.08	6.11359e-06	High	49.31	0.00144297	0
	NYNNQGAYPTYMSNGR	4	1	1	Q10475	N14(Deamidated)	1850.78	0	1.432e-16				High	83.65	2.90197e-07				High	95.39	1.8616e-08				0
	GSNPPFSSSDWSNNK	5	1	1	Q10475		1623.71	0	8.149e-15				High	78.73	7.16727e-07	High	16.65	1.11272	High	93.47	2.38608e-08	High	40.81	0.00432767	0
	MKETVASAFSDK	5	1	1	Q10475		1313.64	0	9.732e-06				High	69.55	4.4977e-06	High	25.57	0.112181	High	28.27	0.0603191				1
	YEYDVPFLLQFQSVYTDKPMK	4	1	1	Q10475		2611.28	0	7.749e-08				High	68.06	2.65813e-05	High	24.11	0.688967	High	45.78	0.00459383	High	56.45	0.000385669	0
	TIAEIHEEAER	8	1	1	Q10475		1297.64	0	3.679e-06				High	67.2	8.26017e-06	High	54.31	0.00016625	High	46.54	0.000918333	High	10.68	3.75802	0
	ISDQILEIAMQSR	9	1	1	Q10475		1503.78	0	8.45e-06				High	66.74	1.05918e-05	High	44	0.00199452	High	74.42	1.82331e-06	High	80.59	4.42596e-07	0
	SQSVNSSVTSNPPHTEEPVAAKPEASSTATK	3	1	1	Q10475		3138.52	0	5.542e-11				High	66.73	4.97582e-05	High	24.78	0.779255							0
	DLLSGLESLSLK	6	1	1	Q10475		1274.72	0	2.442e-05				High	64.72	9.59582e-06	High	46.48	0.000629735	High	50.81	0.000233603	High	35.3	0.0100636	0
	QTNATEPEVVDK	3	1	1	Q10475		1330.65	0	4.738e-06				High	64.1	1.79155e-05	High	37.67	0.00787462	High	33.66	0.0198258				0
	STSQETAPPVSTVPIQFGSITR	5	1	1	Q10475		2303.19	0	8.607e-07				High	63.61	4.35076e-05				High	44.84	0.00334001	High	15.53	2.83957	0
	SGSNTHSHAGPGFGGPSER	5	1	1	Q10475		1838.82	0	3.027e-09				High	61.27	5.84843e-05	High	87.88	1.28796e-07	High	79.31	9.18415e-07				0
	APPSNVAVTSANSFELLEEHDHDNDGGQK	3	1	1	Q10475		3078.4	0	1.73e-07				High	54.59	0.000918191	High	46.61	0.00565	High	40.69	0.0228034				0
	SGSNTHSHAGPGFGGPSER	1	1	1	Q10475	N4(Deamidated)	1839.8	0	6.141e-07				High	54.27	0.000285072										0
	SSAPLASSEANVDTSK	5	1	1	Q10475		1563.75	0	3.907e-06				High	52.25	0.00036663	High	39.88	0.00626576	High	45.57	0.00167231	High	35.46	0.0173654	0
	YSHYQHGFNYNNSGNNR	4	1	1	Q10475		2071.88	0	1.417e-05				High	50.73	0.00072694	High	36	0.0208612				High	11.99	5.43558	0
	GFSSSGAGFGSGSNYK	5	1	1	Q10475		1509.66	0	1.038e-10				High	50.24	0.000398839				High	59.8	4.42412e-05				0
	IVNPVTHTEVVVPQK	5	1	1	Q10475		1659.94	0	2.996e-09				High	48.56	0.000362221	High	12.66	1.56638	High	50.23	0.000297329	High	34.63	0.0093491	0
	ETVASAFSDK	4	1	1	Q10475		1054.5	0	0.0004916				High	47.51	0.000498547	High	16.75	0.603401	High	38.74	0.00372242	High	34.49	0.00990433	0
	DKPDPSSLTIPVDQVAPLQLSANR	4	1	1	Q10475		2561.36	0	2.631e-06				High	44.29	0.00304244	High	38.12	0.0134513	High	30.24	0.0773076	High	36.46	0.0187307	0
	ITSEADTEKYNSSK	3	1	1	Q10475		1572.74	0	6.557e-10				High	43.82	0.00283829	High	14.95	2.19284	High	48.15	0.00104956				1
	GHAAMDVYVLR	7	1	1	Q10475		1231.63	0	0.0001753				High	43.2	0.00193367	High	48.57	0.000561541	High	40.76	0.00339142	High	24.56	0.141378	0
	ATDEPNFSNMYAR	3	1	1	Q10475		1515.65	0	7.749e-05				High	41.87	0.00267853				High	25.6	0.116642	High	24.86	0.134554	0
	LLMTVGVNIDATEK	2	1	1	Q10475	M3(Oxidation)	1519.8	0	4.976e-05				High	41.68	0.00286284				High	36.1	0.0128995				0
	RDLLSGLESLSLK	2	1	1	Q10475		1430.82	0	0.0004477				High	41.17	0.00239081				High	34.43	0.00997				1
	DNAAPVENVNEK	4	1	1	Q10475		1299.62	0	8.803e-05				High	40.82	0.00359741	High	45.71	0.00116678	High	22.76	0.230139	High	32.95	0.0220287	0
	SGSQVSDQVVESPNSSTLSPR	2	1	1	Q10475	N14(Deamidated)	2162.02	0	8.486e-05				High	39.97	0.0127629				High	13.32	5.9013				0
	FMLMDVMDSR	4	1	1	Q10475		1244.55	0	0.0005759				High	39.17	0.00348047	High	54.58	0.000100147	High	54.62	9.99191e-05	High	31.96	0.0183079	0
	AETPTAAPPQISEEEASQR	5	1	1	Q10475		2011.96	0	7.343e-07				High	36.83	0.0233324	High	20.08	1.11036	High	38.46	0.0158314				0
	FIGELFK	4	1	1	Q10475		853.482	0	0.00701				High	35.02	0.00163683	High	35.27	0.00154527	High	34.43	0.00187501	High	28.64	0.00711219	0
	GFSSSGAGFGSGSNYK	3	1	1	Q10475	N14(Deamidated)	1510.64	0	0.0003198				High	34.11	0.0175832				High	16.65	0.869413				0
	GHAAMDVYVLR	3	1	1	Q10475	M5(Oxidation)	1247.62	0	0.003287				High	32.94	0.018624				High	32.18	0.022216				0
	MMDSIDDSIRDEGVLDK	5	1	1	Q10475		1938.88	0	1.031e-05				High	31.92	0.0606055	High	18.25	1.44611	High	23.72	0.404875				1
	SGTQGSHGPTSLSSMLK	3	1	1	Q10475		1674.82	0	0.002066				High	31.17	0.0655753				High	26.21	0.196013	High	27.11	0.152905	0
	NGFAPIVK	2	1	1	Q10475	N1(Deamidated)	846.471	0	0.008691				High	29.3	0.0376555				High	22.47	0.18063				0
	QVIQLTFEK	4	1	1	Q10475		1105.62	0	0.00503				High	25.61	0.0479508	High	22.85	0.0845644	High	17.41	0.29139	High	30.45	0.0146505	0
	APPSNVAVTSANSFELLEEHDHDNDGGQK	3	1	1	Q10475	N12(Deamidated)	3079.39	0	0.0001126				High	25.54	0.703721	High	33.16	0.122359							0
	GEDEEALLPPEVVQR	3	1	1	Q10475		1680.84	0	0.003158				High	25.06	0.226587	High	30.75	0.0628943	High	30.73	0.0666502				0
	FMLMDVMDSR	2	1	1	Q10475	M7(Oxidation)	1260.54	0	0.001582				High	24.56	0.103059				High	18.71	0.397029				0
	AGEAEIMSDEYYVAAAIK	2	1	1	Q10475	M7(Oxidation)	1946.91	0	7.439e-06				High	24.27	0.376168				High	15.35	3.09685				0
	YEYDVPFLLQFQSVYTDKPMK	2	1	1	Q10475	M20(Oxidation)	2627.28	0	1.646e-10				High	22.69	0.999836				High	38.69	0.0249119				0
	NYNNQGAYPTYMSNGR	1	1	1	Q10475		1849.79	0	4.18e-05				High	22.32	0.426416										0
	APPSNVAVTSANSFELLEEHDHDNDGGQK	1	1	1	Q10475	N5(Deamidated); N12(Deamidated)	3080.39	0	0.002122				High	21.04	2.07387										0
	QAVKPSGVEPTNTSR	6	1	1	Q10475		1570.82	0	0.000363				High	17.85	0.960565	High	29.4	0.061541	High	29.27	0.0682023	High	14.4	2.09859	0
	RNYNNQGAYPTYMSNGR	2	1	1	Q10475	N15(Deamidated)	2006.88	0	0.0001063				High	15.7	2.58656				High	35.54	0.0264594				1
	MMDSIDDSIR	1	1	1	Q10475		1182.51	0	6.623e-06										High	55.72	5.98794e-05				0
	AGEAEIMSDEYYVAAAIK	1	1	1	Q10475		1930.91	0	9.773e-07										High	30.02	0.106309				0
	SGSNTHSHAGPGFGGPSER	1	1	1	Q10475	S7(Phospho)	1918.78	0	0.001828										High	13.16	2.77517				0
	IPNLPSR	4	1	1	Q10475		796.468	0.001	0.02525				High	43.62	0.000217255	High	35.79	0.00131817	High	39.71	0.000534527	High	38.26	0.000746397	0
	KMMDSIDDSIRDEGVLDK	1	1	1	Q10475		2066.97	0.001	0.0143				High	18.36	1.7039										2
	NGFAPIVK	2	1	1	Q10475		845.489	0.001	0.005419							High	35.48	0.00747487				High	23.21	0.126068	0
	ISDQILEIAMQSR	2	1	1	Q10475	M10(Oxidation)	1519.78	0.004	0.02639				High	18.16	0.867658				High	21.16	0.404235				0
	SGSQVSDQVVESPNSSTLSPR	1	1	1	Q10475	S19(Phospho)	2241	0.008	0.1188							High	11.3	9.47394							0
Q9USR3	Phosphatidylinositol 4-kinase stt4 OS=Schizosaccharomyces pombe (strain 972 / ATCC 24843) GN=stt4 PE=3 SV=1 - [STT4_SCHPO]	32.98	1	40	41	102	27.79	0.69	1	1	394.62	13.32	19	22	621.203	29.57	36	39	219.139	9.7	13	13	399.038	17.74	24	27	1877	213.826	6.63916
	Sequence	# PSMs	# Proteins	# Protein Groups	Protein Group Accessions	Modifications	MH+ [Da]	q-Value	PEP	A2	IonScore A2	Exp Value A2	B2	IonScore B2	Exp Value B2	C2	IonScore C2	Exp Value C2	D2	IonScore D2	Exp Value D2	E2	IonScore E2	Exp Value E2	# Missed Cleavages
	SLLEEIIHIGIVR	8	1	1	Q9USR3		1491.89	0	5.645e-06	High	27.79	0.0106458	High	47.67	0.000108586	High	62.11	5.01369e-06	High	36.57	0.00169625	High	41.29	0.000594415	0
	QDVLTLQLIAMFK	4	1	1	Q9USR3		1519.86	0	2.651e-06				High	68.39	4.69402e-06	High	10.69	2.99012	High	22.55	0.194289	High	16.76	0.732748	0
	LSALVEYLLDPSLR	5	1	1	Q9USR3		1588.89	0	1.86e-06				High	59.53	3.38746e-05	High	52.37	0.000163689	High	62.24	2.02395e-05	High	52.17	0.000182021	0
	IPFLDFSPSSFK	4	1	1	Q9USR3		1384.72	0	6.906e-05				High	45.25	0.00123147	High	46.04	0.00102665	High	42.84	0.00224118	High	48.58	0.000572037	0
	ALLALVR	2	1	1	Q9USR3		755.513	0	0.007752				High	39.29	0.00035917	High	22.08	0.018893							0
	LIAIYAPR	4	1	1	Q9USR3		916.561	0	0.003801				High	39.12	0.00129809	High	25.56	0.029465	High	19.67	0.114368	High	12.29	0.625613	0
	NIFNSVGLDVYLFPYR	5	1	1	Q9USR3		1916.99	0	2.281e-07				High	39.02	0.00993741	High	82.35	4.86638e-07	High	54.85	0.000274148	High	67.04	1.52523e-05	0
	SLEDDILQGNTVSPQR	2	1	1	Q9USR3		1771.88	0	4.602e-05				High	35.78	0.0220377	High	34.94	0.0255059							0
	QMALNFVIANPFTSVK	2	1	1	Q9USR3		1779.95	0	0.0005039				High	32.57	0.0336714							High	32.82	0.0322057	0
	ASENALTLFQQLR	4	1	1	Q9USR3		1490.79	0	3.774e-05				High	30.33	0.0467122	High	47.48	0.00090039	High	18.14	0.746591	High	12.14	2.97223	0
	IYGLAISLLIQK	1	1	1	Q9USR3		1331.83	0	4.561e-05				High	30.3	0.0023798										0
	FLNSIFLALTR	4	1	1	Q9USR3		1294.75	0	2.498e-05				High	29.99	0.0116267	High	52.01	7.1449e-05	High	43.9	0.000478672	High	57.45	2.13166e-05	0
	AAAHAVQEPIFQFSVLAR	4	1	1	Q9USR3		1955.04	0	0.0001989				High	27.72	0.100497	High	35.69	0.015539	High	26.78	0.11922	High	26.23	0.127335	0
	LTTEMIAVMGGSNK	2	1	1	Q9USR3		1451.73	0	0.001886				High	27.01	0.102321							High	16.89	1.13066	0
	AIALYNLTSFVESLSK	6	1	1	Q9USR3		1755.96	0	8.004e-07				High	26.27	0.114365	High	69.21	5.4997e-06	High	50.8	0.000400494	High	42.61	0.00279621	0
	FDDGNVTYAQLASR	3	1	1	Q9USR3		1556.73	0	3.138e-05				High	24.8	0.181294	High	19.68	0.599053				High	20.48	0.49827	0
	SMESYPVSVTFFYVPQIVQSLR	4	1	1	Q9USR3		2577.3	0	4.776e-05				High	19.29	1.64865	High	20.74	1.18404	High	10.27	13.9784	High	30.43	0.132871	0
	ITSMEVNLNVLTR	2	1	1	Q9USR3		1489.8	0	4.097e-06							High	53.93	0.000191364				High	26.97	0.0950301	0
	DMWFTLVINR	2	1	1	Q9USR3		1294.66	0	0.0003565							High	50.47	0.000377818				High	38.93	0.0053862	0
	FILYWEPMYPVSGPVMFMPNVK	2	1	1	Q9USR3		2645.3	0	9.089e-07							High	39.07	0.0213692				High	26.12	0.42198	0
	LDVGVYLPSNPDGVIVGIDR	1	1	1	Q9USR3		2098.12	0	0.0001145							High	38.11	0.0108709							0
	IAENLLNSPLGSR	1	1	1	Q9USR3		1383.76	0	0.00104							High	35.3	0.00816009							0
	WNPQLLQYTMR	2	1	1	Q9USR3		1449.73	0	0.000183							High	33.3	0.0232464				High	46.73	0.00105525	0
	SPLALPMTYSPTER	1	1	1	Q9USR3		1562.79	0	0.0005444							High	31.32	0.0434995							0
	HEVALEYLFEHYPSGEFPIDR	1	1	1	Q9USR3		2548.22	0	0.002538							High	31.27	0.136787							0
	NLLESYLADFVDFDDLEVVELGR	1	1	1	Q9USR3		2671.31	0	0.0002							High	28.15	0.286313							0
	LAQLFNYSSR	2	1	1	Q9USR3		1198.62	0	0.002107							High	25.29	0.0578291				High	38.22	0.00313374	0
	NSPLLVFEDFGSNFESNLELNTVLR	2	1	1	Q9USR3		2854.43	0	0.003875							High	19.56	1.90395				High	14.34	6.36311	0
	HRPSSPEEKPFLTQFQSILNLSDK	1	1	1	Q9USR3		2798.44	0	0.001116							High	19.37	1.4619							0
	EAVNGLYDYFR	1	1	1	Q9USR3		1346.64	0	0.003979							High	19.03	0.564492							0
	DEAATVPDSIKPILDR	1	1	1	Q9USR3		1739.92	0	0.003803							High	16.47	1.33226							0
	YDSMGYAESFILETSGTSQLFAHQILWNMK	1	1	1	Q9USR3		3467.62	0	0.001971							High	10.16	29.2426							0
	ASFLSYK	1	1	1	Q9USR3		815.43	0	0.004425													High	44.3	0.000352958	0
	SMESYPVSVTFFYVPQIVQSLR	2	1	1	Q9USR3	Q16(Deamidated)	2578.31	0.001	0.02566				High	17.01	2.80287										0
	VASSTIDEFQK	1	1	1	Q9USR3		1224.61	0.001	0.01096							High	16.99	0.957934							0
	EILFSVLELSSLLWK	2	1	1	Q9USR3		1777.02	0.001	0.004472										High	16.14	0.53022	High	10.55	1.96033	0
	SELLVR	2	2	2	O74953;Q9USR3		716.43	0.002	0.03214				High	20.38	0.252877	High	17.93	0.444538							0
	LHVAAEISVMR	2	1	1	Q9USR3		1225.67	0.002	0.0311							High	17.57	0.332471	High	14.88	0.593284				0
	EEMYPALFR	3	1	1	Q9USR3		1155.55	0.003	0.04612				High	16.5	0.940263	High	24.2	0.105503				High	14.99	0.930268	0
	ANDRDFSILVQFYSIQNK	1	1	1	Q9USR3		2158.09	0.003	0.04762							High	15.91	2.81196							1
	FYLLNYLFLEDTSEYK	1	1	1	Q9USR3		2058	0.003	0.04667							High	13.48	4.90479							0
	DTAITSIYQFANLLSPADTPDSYLAAPK	1	1	1	Q9USR3		2983.49	0.003	0.04705							High	10.69	15.5861							0
	EAVNGLYDYFR	1	1	1	Q9USR3	N4(Deamidated)	1347.62	0.003	0.05254													High	15.46	1.22881	0
[truncated: 19,089 more rows]

## Sheet: correspondence
	A2	wt (untagged) +RNaseA/T1
	B2	Mmi1-TAP -RNaseA/T1
	C2	Mmi1-TAP +RNaseA/T1
	D2	mot2∆ Mmi1-TAP -RNaseA/T1
	E2	mot2∆ Mmi1-TAP +RNaseA/T1
