# Supplementary material for: Ubiquitination-dependent control of sexual differentiation in fission yeast
Source: eLife journal article supplement (doi:10.7554/elife.28046), 2017-08-25
Supplement: supp [file elife-28046-supp-v1.zip › elife_poa_e28046_Figure_2_source_data_1.xlsx]

## Sheet: mot2∆ vs wt
Gene= Name of the feature
Shown are log2 fold changes between the mot2∆ mutant and WT as provided by DeSEQ2
adjusted p-value = significance of the upregulation corrected for multiple hypothesis testing, as provided by DeSEQ2
Gene	Log2(fold change mot2∆ vs WT)	Adjusted p-value mot2∆ vs WT
pfl9	6.20498692186711	3.89600663941989E-82
mug14	4.73096002852997	3.77500005267184E-68
ght3	3.84441059890265	2.55596502803739E-39
SPCC794.01c	3.78287399154699	1.49537154873978E-52
SPCC1739.08c	3.69754368266942	6.55809510142993E-51
shk2	3.63957296754528	9.98381908657774E-37
SPAC1F8.04c	3.42516289836541	1.90241270406323E-29
ght1	3.27555520817872	7.52604594132909E-51
mcp5	3.25306661296538	1.7580193245705E-43
meu13	3.06615028149402	1.27529860629294E-18
spo5	3.02849536319479	5.69385204718187E-19
mfm3	3.0040360331803	2.39420067242712E-24
zym1	2.95769451698224	5.74393313926387E-42
rti1	2.9097547803354	1.54725578124779E-18
meu26	2.87910667025118	1.3932556008049E-19
SPCC576.01c	2.78546758780713	3.29523650510963E-30
hsp16	2.75689492891799	1.00392154087594E-29
SPAC1565.03	2.74261559328328	9.82375979270922E-27
mug4	2.71644509342019	2.2669376052289E-23
rec10	2.70937064963751	1.47740728702707E-55
SPAC6B12.03c	2.64852904309334	5.34748824839245E-26
mei3	2.64768375676424	2.9661304954284E-13
map4	2.58855390750845	7.48527173638727E-13
mug55	2.55560582784836	1.05977894891236E-15
fbp1	2.55301420874052	1.28735956575863E-19
ght4	2.53710887236703	7.41946158039418E-21
rec15	2.51647446924904	1.33770601484316E-14
meu19	2.46624495413201	6.27013323011467E-11
mek1	2.46557226833839	1.70167625155186E-29
map3	2.35804266957419	3.79535136289823E-28
mfm1	2.31631087618505	7.05552417319175E-12
sxa2	2.31136379088143	2.28524250246188E-11
dmc1	2.29262856987128	1.25809195436072E-08
mug146	2.28244925487059	1.94652561223192E-08
matPi	2.23542582864591	1.07193688098569E-07
atf21	2.20063637274922	1.32487688854596E-09
mde3	2.17532462902843	4.14421889205315E-16
dni2	2.16142236119743	3.46709912459863E-09
hop1	2.16068488460481	9.95578669235892E-18
meu31	2.1385247269284	3.04771256729348E-09
agn2	2.13261625678034	2.7456435770085E-12
ssa1	2.13123308666824	4.91705386115194E-37
pfl4	2.13065597758344	2.84617216276836E-13
SPCC338.18	2.0977448260276	2.24289313961408E-21
mcp3	2.09591565330391	4.73429224928867E-17
SPNCRNA.1165	2.06225954962	1.6718848835178E-08
SPNCRNA.1276	2.05658797634455	1.46581538236453E-14
mam2	2.05378953012849	1.07939047658281E-11
SPNCRNA.71	2.04926176542583	7.09983285691685E-09
prl46	2.04633300695827	0.000001471692959529
mug108	2.02785241626315	4.32581235639285E-10
SPCC737.04	2.02779373338108	2.21698782524693E-07
rec11	2.02370304693019	6.15542390099669E-10
sme2	2.00772734350612	3.1358629032004E-10
spn6	2.00280595723659	2.07008343824515E-24
meu25	1.9998569159386	2.53954156131481E-07
map2	1.99444477464165	2.84191845475301E-06
SPNCRNA.584	1.99245228936142	2.40922014478716E-12
fus1	1.99082485137075	9.49444771841835E-14
mug103	1.95899892931575	9.64535078469708E-08
rec7	1.93904937725533	2.85454454857184E-11
mcp6	1.93439082190426	4.27839593236374E-13
SPAC3G9.11c	1.92586506347389	4.84604504905373E-07
mug147	1.91065235417402	2.92477778588094E-14
egt1	1.86117363412342	4.73429224928867E-17
meu1-1	1.82876710576151	2.50820040898653E-08
SPBC1289.14	1.81407979160013	0.0000143608495615144
spo13	1.80537830250542	1.24036600160008E-09
SPAC1F7.09c	1.78489932847648	9.53930667655114E-11
rec8	1.77298033586171	8.35219488857278E-15
SPNCRNA.650	1.76867141501804	7.26957130040893E-06
SPAC26H5.09c	1.76848807283717	2.78140490242348E-14
eno102	1.76576485179426	2.24927896359656E-07
rsv1	1.75711121398659	0.0000159399595244178
meu15	1.7361842483802	0.000046348533846292
mug131	1.72893549121009	7.0231695718846E-10
SPNCRNA.556	1.72878266120848	7.70083590794729E-06
SPAPB17E12.09	1.72391437191963	0.0000103492626235666
SPCC965.14c	1.72086518094381	2.3107997149065E-08
SPNCRNA.1318	1.72000209268577	1.73132389716803E-07
dni1	1.71804710909708	3.65480156615144E-11
SPAPB1A11.02	1.70870291791865	0.0000389969599927841
SPAC13G6.08	1.70521382858182	2.83931959042743E-06
SPCC1235.18	1.70462229139287	5.25445317379061E-07
spo4	1.70044148909851	7.19651922633775E-07
cuf2	1.69724357622164	0.0000054159307456855
mug62	1.68599674932875	2.15407430570061E-13
SPACUNK4.10	1.67500576969157	1.42476241920187E-18
meu27	1.66674055552541	0.0000706530145466246
SPNCRNA.1238	1.66412107949986	8.15681419711445E-06
inv1	1.66257559821285	1.72234063600805E-06
SPAC23H3.15c	1.66104089171003	1.76708106741693E-07
trp663	1.65559625448316	0.0000858171431257388
cid11	1.65456120082384	5.13712754922606E-07
SPBC146.02	1.65159522525213	1.03103106149491E-09
gsf2	1.64443455469268	0.0000619705810069198
omt3	1.64397107416313	1.39202043927592E-12
SPBC21D10.08c	1.63553599606212	0.0000012381954481817
SPAPB1A11.03	1.63482241936628	4.96157121351417E-08
spn7	1.62112182969327	9.38972165490438E-10
mug137	1.62042213903569	0.0000103492626235666
mug98	1.61751482921042	0.000105266357163731
spo6	1.61099178849821	0.000141600235776244
shu1	1.60214389478544	0.000245152515047044
mug28	1.60090552689763	4.36044065713331E-07
SPAC27D7.09c	1.59929375015236	0.0000123385870408415
SPNCRNA.1647	1.59666549393623	0.0000835717002892465
mug10	1.59546472659726	5.11172658014638E-07
mei4	1.5954577756321	0.0000016939859302122
wtf13	1.59173393878926	0.0000399299038850393
SPNCRNA.606	1.5780898991416	0.000237118698462223
rec25	1.56956743237857	2.8898011414669E-09
mug133	1.5680998556902	6.74854548084694E-12
gal10	1.5441001914171	1.80327368967732E-07
mug20	1.54358316745668	4.75630809467805E-06
meu14	1.53873535113393	8.91114527090271E-06
rep1	1.5386574696263	2.78144339481243E-10
SPBP4H10.10	1.53825296501712	8.94173079525891E-14
matPc	1.52608510005185	0.0000013143954206882
mug136	1.52466943182081	8.05904904832327E-06
spn5	1.52401955639979	0.0000687447485244282
wtf20	1.5226485538387	3.33335668809668E-06
mde5	1.52089477890343	0.000260320721648603
mug68	1.51220037867393	8.05904904832327E-06
SPNCRNA.569	1.50209727622752	2.80777827264866E-06
SPAC1399.01c	1.49863033511014	2.07739332368541E-09
mfr1	1.49856161850389	0.000142325801225435
SPNCRNA.1201	1.49662820090462	3.83141253255133E-06
meu3	1.48717186283524	0.000762877492967143
mug45	1.47591310227195	5.79370208280971E-12
mug126	1.47129187084024	0.000359714578284121
SPNCRNA.1278	1.4656197323097	0.0000103492626235666
SPCC70.04c	1.46128350389228	5.61011095204671E-08
mam3	1.44714394686968	0.000107639869168404
SPAC977.05c	1.44647633022175	0.00101796028815887
mug96	1.42557646831653	0.00140611402188642
SPBC17D1.07c	1.42301525076625	1.53068786261379E-06
grt1	1.41938079627226	0.000452146006918276
rgs1	1.41388775540557	4.78839797924502E-07
meu22	1.41122020191322	0.000269617094667174
gld1	1.41062161651724	0.0000339893600717574
isp6	1.40917475980708	1.42080762680457E-19
SPNCRNA.576	1.40592563676206	0.0000104827299360222
meu32	1.40151502229074	0.000109321894530795
SPBPB21E7.04c	1.40042031267558	0.0000136142627316719
mug93	1.39930394468532	0.00133809392032829
rem1	1.3980229768553	8.79503232120569E-06
yak3	1.39710777631188	1.11767439174993E-08
SPAC4H3.03c	1.39155904700501	5.94863145029172E-08
wtf23	1.38390161778743	0.000755518648872253
SPCC569.07	1.37881753723156	3.04780256280981E-12
hsp104	1.37766255058229	2.85230685046899E-07
mug125	1.37604631651642	1.48918866187418E-08
agl1	1.36518620902684	0.0000965243262902348
mpf1	1.36427186948215	0.000235981619141848
wtf16	1.36220580280022	0.000485689101239971
atf31	1.3600601303175	0.0000254811545731876
mug24	1.3591029876953	0.000122044001712155
SPNCRNA.1205	1.35711920851307	0.000822028095327014
SPNCRNA.1473	1.35642045918509	1.86951555690077E-06
crs1	1.34536440871363	5.69132995713731E-06
mpd2	1.34158156353428	1.34035026703233E-08
mal1	1.33926496096008	6.63346438719482E-08
rad50	1.33850434746464	1.79743316572791E-14
mug97	1.3367810623589	0.0000156007155953499
SPCC1450.12	1.31727736354601	3.14459408188867E-16
SPNCRNA.687	1.31625128923224	0.000333262015577914
SPBP8B7.32	1.31207431100533	1.50173141620955E-06
mde6	1.30638176749557	0.0000125760827682502
SPBC713.09	1.30363173706385	7.73162756699518E-13
mei2	1.29822805397939	2.71940259418185E-06
ste6	1.29242657139073	0.0000529037125935274
gas4	1.29104731660743	0.000498001278448626
dhc1	1.28971174186917	1.28941609857115E-07
SPBC6B1.03c	1.28873375516822	0.00269278857334908
mug143	1.28576448852815	5.67573063225715E-07
psm3	1.28491610099198	6.29760521952791E-12
SPCC622.15c	1.28345755107365	3.95732175302168E-08
eta2	1.279479939827	1.22705162483026E-08
mug27	1.27935405134315	0.0026557144476804
pep3	1.2756168524722	5.72046627075933E-09
hri1	1.27429480402089	2.92173814668101E-07
mug95	1.27225171392225	0.00171399919114664
opt3	1.238804183921	2.49904837159549E-07
isp3	1.23849538537046	0.00542926593858962
SPCC1281.04	1.23667572726404	0.00132965099363794
mcp4	1.23435459708875	0.000173064038455791
mug63	1.23177485405274	0.0000173159777494296
SPNCRNA.1121	1.22891905957204	0.00120413004301535
hsp3102	1.22844460316735	0.00145317652777844
ssm4	1.22809494293124	0.00143171043308463
mug135	1.22277900249286	0.00119450335387288
bqt1	1.21682009866696	0.000945617858948646
SPAC22F8.04	1.2067655111446	3.71197940334101E-11
mug114	1.2055429102113	0.00284939203590542
pol4	1.20488928582649	0.000263580587453608
meu7	1.20424126416379	0.00589778884722811
ste7	1.20297135852169	0.00359972297522253
mug130	1.1993222140223	0.0000669415327619895
dic1	1.19504026283946	0.000224667824348433
lsd90	1.19233510441812	1.84882537969769E-06
wtf19	1.18641831362568	0.000447381109841319
wtf9	1.17829401298521	0.0000110754815874908
wtf12	1.1663878133213	0.000140358367906871
png2	1.16511357252695	3.45761264069929E-13
SPAC11D3.19	1.16476209372051	3.42006031100441E-09
spk1	1.16315989328824	0.00048941961646653
SPAC6G10.06	1.16131167347666	0.00296181096788401
SPNCRNA.1481	1.15644479576192	0.0027728720338014
mde1	1.15416798544709	0.00235598311586736
SPAPB15E9.02c	1.15378192446974	0.000536532974863671
sst6	1.14003037780695	0.000583643937860526
SPAC343.04c	1.13890707993206	1.80538155634814E-20
SPNCRNA.1164	1.13647059751792	0.0089261251956444
SPBC354.11c	1.13327963826541	0.00204982972433002
mde7	1.1331871379029	0.0129128493787718
SPAC1F7.10	1.12922663828815	6.56334138945596E-07
adh4	1.12900931888106	0.0000364125423478633
cdc10	1.12895682486163	2.8898011414669E-09
mok14	1.12738834085338	0.00464792314199458
SPAC3H1.06c	1.12229622539875	8.36371056501868E-17
SPCC777.04	1.12174420426803	0.00240695465062951
SPCPB16A4.06c	1.11383425826936	2.53954156131481E-07
tpp2	1.10575424874593	9.27414203769652E-10
SPNCRNA.1068	1.10298226657123	0.00128340037037524
crp79	1.0939234250065	0.01443241157696
ste4	1.09057605709239	0.0000356520540373938
SPBC28E12.02	1.08716053417593	0.0160080664494156
cta3	1.08702515180613	0.003791662951997
SPCC11E10.09c	1.08567357030596	0.000134177094614466
xlf1	1.08254964331853	0.000235981619141848
aah2	1.07750769442721	0.0000579319451707083
hsp3101	1.07378803402521	0.00023672250142918
meu6	1.07358783457476	0.017775823745846
eaf1	1.06820686807741	3.23881959644887E-07
prl65	1.06528414170582	0.00538246034199515
SPNCRNA.801	1.06467353051345	0.000249889194936707
SPBP19A11.02c	1.0547281355296	0.00722620531549019
SPNCRNA.963	1.05210402420113	0.0141531658808108
ght5	1.04980396861167	0.000219783782196916
ucp7	1.04857741410746	0.000143898643490958
SPAC637.03	1.04807825186005	0.00332109196228871
psm1	1.04630660404993	2.14116488699056E-09
SPAC22F8.05	1.04353010853284	0.00207618544585391
map1	1.0417334407603	2.06627106145418E-06
dli1	1.03990212453444	0.000438646453339804
SPAC959.05c	1.03970576008379	0.000188167468398795
SPAC4F10.17	1.03488179623071	0.0160080664494156
SPAC513.02	1.03389841129014	0.0000812056208060467
SPAPB24D3.07c	1.02571789816838	0.0148313049279215
tht1	1.02303760104031	1.08177519779106E-06
SPAC4H3.04c	1.01920151387378	0.00677097207196972
meu23	1.01844305299576	0.000332815009247791
SPNCRNA.1601	1.01702861694451	5.92957062950216E-07
mug82	1.01498794354087	0.0103671710686291
SPBC17D11.08	1.0148018899683	1.69836979802027E-12
str3	1.01279051403849	0.0271802616974965
ppk33	1.00838963863458	0.000511238541892367
mug185	1.00829097339303	6.63017393859795E-06
SPBC16H5.12c	1.00767361298073	3.12978304038742E-07
SPNCRNA.888	1.00708897162719	0.0000721909392518144
scn3	1.00688257743971	0.0000772363668462429
pdc1	1.00554144751175	5.99650951628518E-08
rec24	1.00407857490312	0.000983282586808102
myo51	0.995287664064243	2.5463992392424E-10
SPNCRNA.626	0.995018339874952	0.00165572028894801
SPNCRNA.1637	0.993048768332247	0.00340885501079874
SPCC1235.17	0.992447644623288	0.0110178584519062
prm1	0.992141671669361	0.000677918954272509
SPAC11D3.01c	0.991086728382385	0.0331341589951465
meu10	0.990860314394825	0.0274540520937847
SPCC1442.02	0.985822362071935	1.53286771045026E-11
apc5	0.984403251886991	0.0000173159777494296
mug186	0.980192929572554	2.34406243551001E-06
cwf25	0.979460892467218	9.41509804007322E-09
SPNCRNA.561	0.976205867983707	0.0121460885545445
wtf7	0.975895551499407	0.0011119467025289
mik1	0.974161160187957	1.65750446221499E-09
gpd3	0.97312859597663	0.0000177700707577915
SPCC569.09	0.971414874466536	0.00334261274724216
klp9	0.970484959560932	9.50300864766035E-06
SPAC10F6.15	0.967988304490617	0.0381143849880808
SPBC56F2.03	0.965817503802477	0.00957051986116629
SPAC32A11.02c	0.964692187916041	0.0000271261947638361
SPAC6C3.05	0.964464328850701	0.0303005122764623
slt1	0.954567692178509	0.000643342196512662
SPBC776.16	0.95352741467687	0.0049909898807862
SPAC22G7.11c	0.95037661812456	0.0102783337340707
itr2	0.949626635576125	1.41100624014543E-06
SPAC222.14c	0.947671413575708	5.92957062950216E-07
mug110	0.946880140038515	0.00725568868532703
SPNCRNA.952	0.944668916693706	0.00850786675556529
SPNCRNA.1542	0.941879106080024	0.0190851648019995
SPAC56F8.12	0.937865926698469	0.0270611484048465
mdb1	0.935946474626437	0.000025533750539801
SPBC1711.11	0.933103237880472	0.000619687954560561
prl56	0.93176843646775	0.0172698245576081
eng2	0.931534061246839	0.000396221100574698
wtf21	0.931458478266594	0.000438646453339804
gpa2	0.929231449503483	8.05904904832327E-06
mug1	0.927807853629477	0.000257701927921372
bgl2	0.924376197456177	0.000596668342108504
SPAC31G5.21	0.92425408047051	2.06129478316793E-09
SPBC2F12.05c	0.922939054459417	3.84579527945684E-07
SPAC12G12.11c	0.922696937465523	7.25734094150333E-06
SPNCRNA.580	0.921877615216889	0.0230754339823658
adg2	0.92025488024273	8.05586830220357E-07
cwf23	0.91817496698925	0.0000502178527935064
rec6	0.916954674520737	0.00118879270908206
atg1801	0.915445027703953	1.08046710483322E-07
wtf11	0.913912428805413	0.0115993464216481
rim20	0.911026057840693	6.06839376082123E-06
cut9	0.90928432566083	0.00033178453873538
cnd3	0.906959309428856	0.0000570775536742475
cda1	0.905906050978569	0.000122995653114178
SPNCRNA.573	0.905891114548977	0.00990992040440272
SPAC13A11.06	0.903063221096858	0.0498150197427156
ubx4	0.90267102839461	5.16050157499815E-07
cps3	0.894217571195237	6.48684854620391E-10
SPCC1672.03c	0.891695560491675	0.00202867687213861
etr1	0.891364009267717	0.0000194922429834827
SPAC25B8.08	0.890417313394071	4.34288010032625E-12
bzz1	0.889733456286278	0.000175659139145614
ppk31	0.888448889006157	9.50300864766035E-06
SPNCRNA.1118	0.887996064674415	0.0172115130484279
wtf8	0.886924866007589	0.0102272881043235
SPCC4G3.03	0.885941440214508	3.51110615246531E-07
ste11	0.885626767427592	0.0283748916900749
SPAC23A1.14c	0.883968859208394	0.000276900397832755
sst4	0.88202682229252	0.0003201502333143
SPCC576.02	0.881945927383096	0.000804270378462331
SPAC167.05	0.877496103523366	2.93357580792874E-09
SPCC794.16	0.877130464818812	0.0182407593200473
SPNCRNA.993	0.875315838104891	0.01510087359041
cdc37	0.87426401212588	0.00101796028815887
mis4	0.874164274790469	0.00039207854781149
SPCC1223.09	0.872674129867581	0.0000875940300779234
spt16	0.870617787020279	0.0000398608269187158
SPAC18G6.01c	0.869901319862405	0.0000513566015408036
rad54	0.869013675537854	0.0000254405268189965
atg8	0.86692211154789	0.0000371911017914512
erf4	0.866678280471161	0.00663638225199193
SPBC725.03	0.866620376799155	0.0118570719114077
SPCC569.01c	0.865513019976098	0.0208946569281893
SPBP19A11.07c	0.860033449294088	4.1771154865377E-07
SPAC26F1.07	0.859335929652031	0.0000087499311073327
gmh1	0.859207575419492	0.0163889475703819
SPNCRNA.935	0.858150814730002	0.00122553737961582
SPAC12B10.13	0.85701526633353	0.0000039237813224297
tti2	0.856320122170148	0.000134985975858647
mug109	0.855685690096002	0.0160080664494156
mad3	0.855671852770898	0.000874553435487247
bgs2	0.854997313577447	0.0378495034539999
SPNCRNA.1115	0.854683355635226	0.00575490685384762
SPCC757.13	0.854134285829414	0.00804430845281339
SPBC4F6.17c	0.852480350807773	0.0156748238350446
abp1	0.851269327023153	0.000432804952959972
arb2	0.851166883703852	0.00253268804271065
pof3	0.850935791641869	0.000482573465993624
otu2	0.850672573416065	0.0000103492626235666
mug37	0.849145685715941	0.00782363190684397
atg7	0.847646920700316	1.84270481156082E-08
SPNCRNA.1079	0.847174430400709	0.0171312090535348
rpn2	0.845177448245856	2.99587481502365E-07
pmh1	0.844232140455991	0.00327646339932686
SPCC1235.01	0.843262091569109	0.0129128493787718
SPAC22A12.08c	0.842829395475685	0.0000715272737771774
nep2	0.83248335766329	0.000876612929400441
SPNCRNA.628	0.831540285495348	0.0498256016199604
pil2	0.830654880580358	0.0328601045386591
SPBC4.03c	0.830475987630821	3.73481215871316E-06
cay1	0.830031889766841	0.000249889194936707
SPAC4G9.12	0.826655104547399	0.000132476170116053
mug153	0.82638624132486	0.0474266086844928
SPAC15E1.02c	0.82378818401014	0.0158221164546811
tht2	0.823030786556441	0.00223687282782118
rdh54	0.82197069664343	0.000679097401915132
nbs1	0.817634270615029	0.00445433067570392
mus81	0.815841440811951	3.28824990447568E-06
SPAC1952.17c	0.815013104507045	0.00295160825485474
ran1	0.814533229052768	0.0250975931169331
SPNCRNA.1696	0.813355762117103	0.02901351853492
spo15	0.813217268081333	0.000452219359144718
gti1	0.812665730137536	0.00415257199397321
mfm2	0.812283458233928	0.00264863097190573
SPNCRNA.733	0.807987637971727	0.0115993464216481
SPAC212.04c	0.807367818542848	0.0458238777623368
mok13	0.807262141474813	0.000191910398208464
cdt2	0.807213749117815	0.000645909138775581
ufd2	0.806970098850116	2.21698782524693E-07
sre1	0.806686743844355	2.43525621439368E-06
SPBC365.07c	0.805989019716138	0.00182974440938553
sgf73	0.804364242128314	0.0014867564809995
SPNCRNA.1480	0.801715715983202	0.0199378275695829
SPAC1610.02c	0.801271192351175	0.0000124755099228117
lkh1	0.801262686490433	0.0287151827335523
rng3	0.800096340188359	0.0000811379743380095
ptr6	0.79959725607112	1.11335228500709E-06
ppn1	0.79911925950326	1.60202409105124E-07
pnk1	0.798766292899555	2.34406243551001E-06
SPBC1604.18c	0.797489328577977	0.00866095370474317
mde10	0.796800937839397	0.00312162908658714
SPCC1322.09	0.795442188030765	0.00219937558770493
tfg1	0.795043528686865	0.0121563723254442
SPNCRNA.560	0.79356529902194	0.0466148285389853
arp6	0.792378195972784	0.0000315746555492551
dma1	0.79158041545051	0.00948146125480539
mvp1	0.790680753413455	0.0000811379743380095
SPNCRNA.575	0.789908320253434	0.0376305454915918
SPAC222.13c	0.789367450258291	0.00235444766584824
cog6	0.788784917779756	0.0158221164546811
osh3	0.788717036677909	1.70048710438573E-07
knd1	0.78743420045425	0.00164660289043822
hhp2	0.785667345417955	1.26403504347761E-07
SPNCRNA.796	0.784753772620557	0.00343382121493734
cul1	0.781838788175348	0.0000124780257349191
ell1	0.778740372894541	0.00625226989733518
far11	0.775697222712435	0.000349777768821597
SPBC428.10	0.77377459492141	0.0000118141185900858
ubp6	0.773537502419549	0.000134524707327384
SPBC3E7.04c	0.772999117939438	0.000245152515047044
pof2	0.767600462639717	0.00143997439791323
ccq1	0.766830896419215	0.000178212054576051
frp2	0.766710574957811	0.00581813476683175
mug168	0.766701325380309	0.0140708811514765
SPCPB1C11.02	0.765997466457466	0.00129397814645255
cut2	0.764914732654802	0.0000872839191614328
SPNCRNA.111	0.764796179973327	3.15054249290393E-06
SPBC106.13	0.763780784554599	0.0000787207667984682
pom2	0.76235041675434	5.21177761729302E-06
SPCC16A11.15c	0.759971687111975	0.00621629681294072
cmc4	0.756532273768253	0.040244003069377
ecl1	0.755950991967431	0.000145823966913164
apl4	0.755594360337195	8.11524246432535E-07
SPBPB21E7.11	0.754085115826218	0.0462820261386019
hri2	0.752022992664021	0.0109533827176427
cph1	0.750223691625132	0.00265730673811457
SPCC1259.12c	0.749848689293041	0.0000502178527935064
aif1	0.748781983055818	0.0000686548798229632
SPCC191.01	0.748661375785317	0.0000532228064966178
cut23	0.746822866004829	0.00175102025226768
mcs6	0.745037851148792	0.00588521147943273
arp8	0.744588265186457	0.0000039237813224297
fsc1	0.744131763558907	0.00018247797090192
SPNCRNA.859	0.743013755659311	0.0298458803874329
rga8	0.741780882198521	0.0000112320334849525
SPAC3A11.10c	0.741644331566679	0.000364714089148549
mug174	0.741206110583179	0.0166141222040081
SPBC3H7.08c	0.740534023816667	0.0257460390597053
SPNCRNA.710	0.739960059164334	0.040244003069377
csn2	0.739312231175714	0.00763222349835821
pof14	0.738837203180901	0.00399308411073821
vac8	0.735048817331558	0.00267435618285818
SPAC23C11.06c	0.735009951185707	0.00691987594731447
plo1	0.73311351363454	0.0000850479427643063
atg20	0.732769367658759	0.0000106199204733536
dal1	0.730805533835589	0.00307999042935216
SPAC4H3.08	0.727214239372895	0.0168382256587565
SPNCRNA.1156	0.726391775185352	0.042083714165455
SPNCRNA.1454	0.726385826736842	0.00394525594642528
sst2	0.726143257266678	0.00136761088100044
prp24	0.725393240473073	0.00090400654596778
adn2	0.723927565844815	0.00017344607718796
sck1	0.72302348717907	0.0000264422631878138
SPCC1620.12c	0.72212756703506	0.0000236444514404018
SPAC13C5.05c	0.721876562157091	5.53734704063703E-07
gdh2	0.718564211965918	0.0055249163298108
git7	0.718301243753124	0.000439355757071235
SPAC1F3.03	0.7180947627317	0.0000809874545801188
dnm1	0.717047264670112	4.62923845868278E-06
mag2	0.715986512501413	0.0495800736040327
SPAC4G9.22	0.713794987553129	0.000173064038455791
hba1	0.713379303392604	4.98066813413562E-06
pir2	0.712729103886871	0.0143012267169311
SPAC24B11.05	0.712594281390474	0.0014398588293533
SPBC1685.14c	0.712441073508544	0.0115132893860646
pms1	0.711492993856502	0.0000509978372715388
SPAC1B3.06c	0.709959520445569	1.72234063600805E-06
SPNCRNA.920	0.708150864651984	0.00807063632249365
lub1	0.707802717121383	0.000026046892940489
ufd1	0.707261960355672	0.0000222469961618334
spc19	0.705449917581858	0.0363268471888267
SPBC29A3.03c	0.704878499504398	0.00010575994097476
myo52	0.704127827051251	0.0000072746742637094
meu34	0.703334907631186	0.0452096131753438
rev1	0.702293026526266	0.0392648600823911
uba5	0.702034198490068	0.0145735168141356
SPBC119.03	0.701240929725037	0.00767131423023298
SPBC12C2.03c	0.698875015924897	8.05904904832327E-06
ain1	0.696689087786896	0.000417939626524336
cap1	0.696123705401728	0.00279161173943919
ams1	0.692203871596969	0.00345320838925905
bxi1	0.690298589588577	4.89404154852144E-06
SPAC23A1.17	0.68954475151905	0.0038832928181893
SPCC1442.07c	0.688371976494154	0.00192400712759465
mug30	0.684423667601788	0.0147389920185174
SPAC4G9.19	0.6836426884903	0.0170801794202016
vps901	0.683004116193154	0.000250904005547801
SPAPB2B4.06	0.680824101748529	0.000294374713350971
lip5	0.679936524021024	0.0105125938116178
bro1	0.679700842142934	0.000332815009247791
SPCC622.11	0.679700148402482	0.0000463240822368564
atg22	0.679571592330353	0.00674061314738486
SPCPJ732.02c	0.678977384575615	0.000153391485758079
dbl3	0.67595385536492	0.014860869707413
SPCC576.17c	0.674120296523269	0.0375466922535647
mug74	0.672336843023851	0.00770975270354287
sid4	0.672114191547504	0.000409494329470338
SPBC660.08	0.671848302923705	0.0000822118319380469
SPBC23G7.06c	0.671543271710107	0.015974592194236
SPBC18H10.05	0.67128438232697	0.0379123669501968
csm1	0.670493293245023	0.0103660377634127
SPBC215.07c	0.670193171847227	0.0250332490244205
tah18	0.669724494380209	5.71595499343112E-06
for3	0.668807018173418	0.0152369098326123
uap2	0.668680832469652	0.000669305615790237
med15	0.668347138117485	0.0106041546448922
pbi2	0.667359054250644	0.00634231957072635
SPAC4D7.02c	0.667129240481824	0.00181613211763807
SPBPJ4664.02	0.666963038084806	0.0000872839191614328
npr2	0.666881690678641	0.0176234097392365
sac11	0.665954810790439	0.00589778884722811
dcp2	0.66495632561566	0.00253235682566056
SPBC354.08c	0.663373357032568	0.0324728436775385
SPCC364.04c	0.663156398983955	0.00295160825485474
SPNCRNA.511	0.662434239738387	0.0209151351264308
SPNCRNA.1087	0.661032683446922	0.000886751667999769
cyp8	0.660981019078018	0.0000195843337347666
fzo1	0.659291862246352	0.000679302506885788
apn2	0.658787402309747	0.000836170953922567
cwf19	0.657352661670329	0.000119552015141408
pcp1	0.657196714689004	0.0000576015105350936
mug8	0.656383824194709	0.0231539762721764
SPBC3B9.03	0.654775949583621	0.0000241649318613097
SPBC32F12.17	0.654192927633761	0.0224798729739813
gyp7	0.653555861975126	0.000935885283834238
sgo2	0.652884558709603	0.00141757916600976
ntr2	0.652560165728256	0.00315036417679987
dsc5	0.651922036746608	0.00017344607718796
pck1	0.651920520500575	0.000286232302664132
SPAC110.05	0.651105169610462	0.044918059517361
byr2	0.651013410512538	0.00556044965444058
spp1	0.64931251129535	8.05904904832327E-06
SPAC139.01c	0.648788425663019	5.38197203309928E-06
saf1	0.647581458957898	0.00142311121598474
ppk15	0.646935321458351	0.00055896745995474
SPAC24H6.08	0.646116339879518	0.00428384554219722
cul3	0.644898403444703	1.14784382525467E-06
SPACUNK4.16c	0.642598934666515	0.0305318248783599
lin1	0.64220036973847	0.00737182452652818
SPCC1919.02	0.64107078681422	0.0125242725491512
mcp1	0.641023516041958	0.00981350994867699
exo1	0.638699477235471	0.000004502201427776
mug190	0.637634779768095	0.00470130544703847
asp1	0.636922189928361	0.0000880076399784714
SPAC869.02c	0.636380286942262	0.0470400750134421
SPBC13E7.07	0.635292838724678	0.0000338525174287796
rtf1	0.634478188107229	0.000554847821565544
cwf15	0.634418026069608	0.0438014781624657
kms1	0.633552693721664	0.0085929671892283
scm3	0.632579703849348	0.00434786001687447
SPBC11C11.06c	0.632378342803439	0.00406371005747672
sfr1	0.631057646479945	0.0058084229406211
cut14	0.631055943563361	0.0104604727044447
atg12	0.630243657705377	0.0426309940314836
mam1	0.62971682703604	0.01911448338764
cfr1	0.628938048816191	0.0014845717990241
tsc1	0.627488655412379	0.0000574805850307063
cwf26	0.625756622521998	0.00043214279349266
apc2	0.625213041957333	0.0017862773756317
SPBC119.05c	0.62268395776455	0.00398654164386045
cdc15	0.622430628336086	0.00119450335387288
SPCC736.13	0.622399558698071	0.0104032903621819
SPNCRNA.1626	0.61983433822634	0.0378857286327544
SPAC57A7.09	0.615946441107182	0.00460086292739257
ftp105	0.615580934147301	0.0000513566015408036
saf4	0.613824277060678	0.0427870695984893
SPBC16E9.02c	0.613639463090347	0.0406924611370646
usp105	0.611566400006097	4.40938350592944E-06
SPNCRNA.1588	0.610889057119029	0.0461679422318372
rap1	0.610448284149982	0.00690328801887656
swc2	0.609986091999906	0.00199968644621372
SPNCRNA.865	0.608994347635154	0.0218087170297632
imp1	0.608218178024508	0.00182974440938553
mug51	0.606665028838833	0.0118756499834549
mug170	0.606201694992753	0.000419358940767395
fkh2	0.604981053477831	0.000116329074230572
ubp11	0.604495190229207	0.00105931371887528
cut12	0.604074247872956	0.0221406531099852
cwp1	0.60364945887196	0.0460370747441169
mrc1	0.603478369288411	0.0027728720338014
mkh1	0.602699661544476	0.00110031637653997
rpt6	0.600769777046223	0.000980898103210418
SPBC25H2.03	0.600299937355929	0.00276290885024942
SPNCRNA.1494	0.599722972753104	0.0304663767093617
spn1	0.59934682926384	0.00143171043308463
SPBC32F12.10	0.598128299091658	0.000191993103129269
cho2	0.597037061100852	0.00171399919114664
SPAC10F6.08c	0.596975166820334	0.000310206035751205
cig2	0.596882331948947	0.0250870488984457
ate1	0.596434091103105	0.0423625724078529
set11	0.596212979384855	0.0104078234550892
mre11	0.595698320844291	0.0239351443728856
vta1	0.595178218503719	0.0102349575037132
alp4	0.594885330305148	0.000176753403816079
bdp1	0.592975540577355	0.00170555969821355
atg1802	0.59256783479185	0.00532993040384119
ivn1	0.590956435436038	0.00036912726698591
SPAC6F12.08c	0.590954233851879	0.0304663767093617
tps1	0.59085328363093	0.000374601694391871
pds5	0.589674144844172	0.033635533082913
SPCC16A11.03c	0.589096056443039	0.00282409519708106
pom34	0.588725199964953	0.0266150563182488
spo7	0.588606592100013	0.0149517341999834
gle1	0.588402663254611	0.00101786071078693
mmm1	0.587849632713076	0.00464792314199458
SPBC3E7.05c	0.58735550202338	0.0089261251956444
spo2	0.58676629612778	0.0191077626751936
SPAC16E8.02	0.586572555803688	0.0022595503533025
SPBC20F10.07	0.586383452721889	0.002888037768178
nuc2	0.585490508070438	0.000459045537425648
vps26	0.5850952272685	0.018571717270171

## Sheet: rrp6∆ vs wt
Gene= Name of the feature
Shown are log2 fold changes between the rrp6∆ mutant and WT as provided by DeSEQ2
adjusted p-value = significance of the upregulation corrected for multiple hypothesis testing, as provided by DeSEQ2
Gene	Log2(fold change rrp6∆ vs WT)	Adjusted p-value rrp6∆ vs WT
SPNCRNA.1114	3.43104601497822	1.58480857732202E-38
SPNCRNA.1037	3.39385525055107	1.38832976890025E-23
sme2	3.21451186798983	2.651370194944E-31
SPNCRNA.1696	3.10730567931122	4.51246050359394E-47
SPNCRNA.942	2.97143478918149	2.0894920580612E-24
SPNCRNA.807	2.79846688704506	6.901710267317E-25
SPAC5H10.04	2.76937300591556	2.03854123190815E-23
SPNCRNA.1444	2.72466811836056	4.17476173742738E-18
SPNCRNA.1650	2.71357928227122	1.54489882141726E-24
ssm4	2.65296518817132	8.60031864081872E-16
mek1	2.64347684377467	2.75650922053309E-27
SPNCRNA.1235	2.56898928122774	5.77253716968603E-21
SPNCRNA.1057	2.52124662047929	1.10613314379902E-12
rec10	2.49647691742144	8.43392861906759E-41
mug10	2.47645593066312	1.52648942356569E-18
meu26	2.46608303658532	2.7580905708838E-14
mug125	2.4562194102032	3.26366321632429E-27
SPBPB21E7.04c	2.45477613163553	2.51620495300535E-17
rec8	2.43538014038802	5.64970024219432E-28
atf31	2.43034941556526	1.90808660638853E-19
SPNCRNA.1365	2.3835301362795	5.54547515824193E-14
SPNCRNA.1664	2.35322667728249	8.60031864081872E-16
mcp5	2.33441405306956	6.98217584112837E-21
SPAPB17E12.09	2.33342820700293	7.48783534549415E-12
meu32	2.30955647221205	1.09522994114866E-13
meu1-1	2.30632986782816	4.26796765507464E-15
mug4	2.29554255078389	1.13263860871039E-18
SPNCRNA.1523	2.29429012074881	3.73437850608807E-17
rec11	2.26745881679898	4.60590108970626E-13
SPAC27D7.09c	2.2642781346207	8.08153938648539E-11
mpn1	2.25099399941173	3.67489096362039E-23
SPNCRNA.513	2.22055948341515	5.62947625498804E-08
SPNCRNA.1570	2.20883390753439	5.03055641193857E-14
mug45	2.17668472513019	6.68746961557482E-24
rec25	2.17495845154678	1.11845055795049E-18
eng2	2.14138630542362	1.62298511832064E-27
SPNCRNA.584	2.13787634579271	7.42717535125176E-13
SPNCRNA.1366	2.1250180811209	1.07377603554773E-22
SPNCRNA.1651	2.11113893558882	3.46113459584203E-12
SPNCRNA.257	2.0854945446541	3.0741577663406E-07
SPAC23H4.05c	2.07037315204369	1.56177781683161E-09
SPNCRNA.1494	2.04302323392034	3.6973808985943E-24
SPNCRNA.1220	2.03389641104912	2.88195084675237E-11
SPCC737.04	2.02405299929912	1.62418450471775E-12
SPNCRNA.1363	2.01777027995508	5.07627782325981E-09
SPNCRNA.1124	2.01652384523366	3.44871958059844E-07
SPATRNACYS.01	1.99935025441061	1.68578044371394E-07
SPAC4H3.12c	1.98444906776272	2.60593245317665E-10
mei4	1.97594752776383	5.19682097012762E-10
SPCC1442.04c	1.97584574965863	1.34221518991137E-31
SPNCRNA.1259	1.94370823751617	2.80930333002821E-06
SPACUNK4.17	1.91886943764967	7.02120598916135E-08
SPNCRNA.1352	1.91839871821112	4.70239637086966E-09
SPNCRNA.580	1.89897528617759	2.06084901821596E-08
SPNCRNA.561	1.87677535581966	6.61830363687169E-12
SPNCRNA.1290	1.87676226763808	1.88382351381049E-11
SPNCRNA.301	1.87431542780859	6.61830363687169E-12
SPNCRNA.1327	1.86660923266887	4.01862706164421E-10
rpl3002	1.8617166693148	6.81161324868423E-23
SPNCRNA.1023	1.85424520933354	2.41727368204248E-22
SPNCRNA.1050	1.84678918059163	2.60593245317665E-10
SPNCRNA.698	1.83834388301669	6.57008987465969E-15
mcp6	1.83341946720564	2.92654564205477E-11
SPNCRNA.1626	1.82888882096295	1.82465803372234E-17
SPNCRNA.266	1.82855952108454	0.0000027973359198732
SPNCRNA.405	1.82425510131204	1.22405087443356E-06
SPNCRNA.1579	1.82019602013907	2.57705471319575E-08
SPNCRNA.626	1.79826671565924	3.53182269250892E-10
SPNCRNA.1492	1.79696508638296	4.78174170436553E-09
SPBC13G1.15c	1.78428853386435	7.07893091061875E-07
SPNCRNA.292	1.77140060650217	0.0000339354359799343
SPBC13G1.16	1.76649758670311	0.0000133281993099378
prl4	1.76027989043348	0.0000189603245952526
SPBC1271.10c	1.75512161792633	4.07169569641377E-12
pog1	1.75421089244428	2.30247232022461E-16
dic1	1.74674954030379	3.85143010742778E-09
SPNCRNA.1372	1.7462471941445	2.67936027985802E-10
meu13	1.74157188865637	0.000039412441041658
mug1	1.73233412869449	1.8047810730504E-14
mcp3	1.72683846171499	6.86913815198756E-14
arp1	1.72244322735977	4.66102792680967E-09
SPNCRNA.1407	1.71699051323483	3.1989714621443E-13
SPBC1711.15c	1.70355655665391	3.1362215881175E-09
SPBC557.05	1.6759432809518	6.34281944369119E-10
SPNCRNA.893	1.65120518183657	0.000041603539280486
SPNCRNA.664	1.64555121941634	0.0000195122057850661
cbh2	1.63889048607202	1.84467891448819E-18
pus2	1.63677398135524	1.15241353798037E-14
SPAC3A11.04	1.63516639434285	2.22421067651436E-21
crs1	1.62653447030763	5.02350201992843E-10
SPNCRNA.218	1.61629789486516	0.000170827460412367
SPNCRNA.1060	1.60366985253273	1.37131068795311E-09
SPATRNAPHE.01	1.5751462059049	0.000431510076112051
SPCC188.05	1.57436303145515	0.000332187489295259
lsd90	1.55441670646425	2.78447720004056E-06
tht2	1.54716933401806	2.69882293462224E-09
SPCC191.05c	1.53363541461475	6.02337237662953E-06
SPNCRNA.1010	1.51469510043769	0.000181504114391674
mug28	1.51310248959992	2.65772285434619E-06
SPAC4H3.03c	1.51053761716954	7.03588499725395E-07
SPAC23H3.15c	1.50926769447027	0.0000396222128710813
SPNCRNA.915	1.50500285381574	0.000263542875504249
SPNCRNA.431	1.50221257845441	0.000145384019817244
bqt1	1.4977571551823	0.0000304834332076191
SPCC569.07	1.4758233015937	1.91473315766577E-13
SPAC29E6.07	1.47447319105409	0.000419004323509956
SPNCRNA.173	1.47022428675337	0.0000750967110799358
SPNCRNA.1055	1.46937411053881	0.000549703953335155
hsp16	1.4676615423467	1.08432972098701E-07
prl56	1.46535222005645	0.0000094426675056169
SPCC2H8.02	1.45483543320053	5.19848549461935E-09
SPNCRNA.1000	1.45455414482938	6.21087242608152E-06
SPNCRNA.659	1.44273191015851	0.0000013601953780581
rec15	1.44087990852036	0.000533134359296155
SPNCRNA.1038	1.43948971420129	0.0000684663949274005
SPNCRNA.556	1.43040043721475	0.000717853443919874
SPNCRNA.1566	1.42348021051684	0.000035810541585719
SPNCRNA.656	1.40979108130923	0.00203234517674235
SPNCRNA.1619	1.39968609552367	0.00196528863405469
SPNCRNA.771	1.38712769514409	2.11108171819132E-09
mug9	1.37654064325062	2.06015266874141E-07
SPNCRNA.427	1.37246203493953	0.000240170368434422
SPNCRNA.1435	1.37176411487959	0.0000714815365455709
SPBC8E4.02c	1.36317648999753	8.08153938648539E-11
SPNCRNA.983	1.36211712821251	0.00236678425946127
amt3	1.36009695821254	0.000267370065031319
SPNCRNA.423	1.35332280111873	0.00261726773573224
SPNCRNA.1508	1.3388354670854	5.46878135036493E-08
SPNCRNA.1686	1.33435170849796	0.000125401483970719
SPNCRNA.201	1.33342213535343	0.00387234233954122
SPNCRNA.190	1.33264253597778	0.000575009354595895
mcp4	1.33255075944804	3.60274659336163E-07
SPNCRNA.1409	1.32890488267685	0.000415043693004587
rim20	1.32792079921012	3.37050644268879E-12
SPBC24C6.09c	1.32120466491203	0.00120438041647705
SPNCRNA.960	1.31950188575066	7.84448403599245E-06
spo5	1.31922708136409	0.000789160802892095
SPNCRNA.1476	1.3162843535369	1.2589385803536E-11
SPNCRNA.1107	1.316272707447	0.00500298711099027
rep1	1.31615386282771	9.31305191072854E-09
SPNCRNA.760	1.3043829695649	0.0000161407927388239
SPNCRNA.441	1.2992627348555	0.00489593235986309
SPNCRNA.1634	1.29514389618112	3.92470138900938E-06
rhp42	1.2918252866134	2.0895399478505E-08
SPNCRNA.243	1.28757082477112	0.00396762499914264
SPNCRNA.380	1.28240064085628	0.0035118602848109
SPAC139.05	1.28164127036832	0.00236193168930751
prl40	1.27827699820671	0.00477357969214409
SPNCRNA.1161	1.27807853160324	0.00563731764329551
SPNCRNA.751	1.27331047696198	0.00621057310239658
SPNCRNA.268	1.26143476316945	0.00751243076827225
mug8	1.25223396602579	2.22083411081034E-06
rec6	1.24810258722894	7.84271227482061E-06
SPNCRNA.1248	1.24199151385596	0.00124571037767661
SPNCRNA.1455	1.2408361689519	0.00110806189777739
SPNCRNA.1359	1.24064327855273	0.000131790828277935
SPATRNAALA.06	1.23641138446461	0.00807444502071079
SPNCRNA.886	1.23485974274676	0.0000884314244841182
hsp3101-antisense-1	1.23302889018494	4.59902288259287E-06
SPBPB10D8.04c	1.23073870690704	0.00244165502124065
SPNCRNA.649	1.22336977154532	0.00529453794808143
SPAC16E8.16	1.21550260655039	2.88432152687303E-13
SPNCRNA.1258	1.20703333107226	0.00871756599636898
SPNCRNA.1654	1.20669831726297	0.00264599662146889
SPNCRNA.1320	1.20240603382122	0.0000534552926717386
SPAC343.20	1.19884842404602	1.74641136827702E-08
SPNCRNA.239	1.19845666664335	0.0123575401981493
SPNCRNA.1189	1.18971384263251	0.000571468237440709
SPNCRNA.667	1.18298795641129	0.0121651351720035
SPBP4G3.03	1.17734711804025	0.0147507820428659
SPCTRNAPHE.05	1.16937932339042	0.00801210094710064
SPNCRNA.1623	1.16869756394232	0.0106302578593406
SPNCRNA.1364	1.16629399369284	0.0044140987344766
SPNCRNA.885	1.16197619824735	8.57461153730109E-07
SPNCRNA.813	1.1608268261657	0.00353055164491429
SPNCRNA.194	1.15111059185941	0.016083538398914
SPAC14C4.01c	1.14722485931202	1.12553820408947E-09
SPNCRNA.739	1.14255188399952	0.00542489546878339
SPCC11E10.09c	1.14025665812722	0.0000020874631523082
agp3	1.13668978746705	0.0000171916465715434
SPNCRNA.719	1.13488308360447	0.0128836359907142
SPNCRNA.240	1.13035937139544	0.0191258385087354
SPNCRNA.1168	1.12660987500352	0.0105538225128287
SPNCRNA.798	1.12109654742476	7.18245843590624E-06
SPNCRNA.765	1.12030317659838	0.006531313004429
SPNCRNA.1581	1.10578764845863	0.0000750967110799358
SPNCRNA.1236	1.10352979939121	2.22083411081034E-06
SPNCRNA.71	1.09699703198738	0.0190343349148802
SPNCRNA.823	1.09607140725098	0.0247632080800903
SPCC569.09	1.09292887589085	0.000329701494249031
SPNCRNA.887	1.08378580343608	0.000219739030073324
mug20	1.0786461974836	0.00656973163956219
SPNCRNA.749	1.0729709723959	0.00139365188453596
SPAC1142.09	1.07291640804614	0.0163983560402726
SPNCRNA.1238	1.07093240315274	0.0215427367914736
SPNCRNA.1493	1.06692876075038	0.0172075930284696
SPNCRNA.1483	1.0651338385831	0.0000469156644962839
SPNCRNA.1001	1.06351870495123	0.00300669351729371
mug82	1.0624211049889	0.0123496374639913
SPNCRNA.1231	1.05465142623259	0.00489867369489262
SPAC637.03	1.05128292732421	0.00509868591521186
mug95	1.05113316968712	0.0247184962618834
sds21	1.05063745731974	2.69591599449157E-11
SPNCRNA.990	1.04871480191822	0.00525642938416462
SPNCRNA.965	1.04061901699645	0.0283442404046531
SPNCRNA.417	1.04023536834557	0.0377160441325346
spt7	1.04002295931921	4.07758153117992E-11
SPNCRNA.1176	1.03970832769294	0.000241508260645743
spn7	1.03754391163115	0.0000714815365455709
rec24	1.03548576538498	0.00340058755828011
mde6	1.03494067155507	0.0000491878279722887
ppk31	1.0327415931	1.09226583672173E-06
SPAC6C3.05	1.03213843540238	0.0273748647492704
SPNCRNA.717	1.02418019562504	0.0295201714441183
SPNCRNA.255	1.01872251108101	0.0434117399959738
chs1	1.01618176495854	0.000646623552540068
SPNCRNA.1102	1.01362982717877	0.00485558566456548
mde10	1.01318923563356	0.0000392563651212391
SPNCRNA.1217	1.01021928332262	0.0411750050025304
SPNCRNA.177	1.00978047324427	0.0443455290335366
SPNCRNA.1129	1.0096110900883	0.00325348065867435
SPNCRNA.1687	1.00916127638348	0.00292840191528148
SPNCRNA.1249	1.00770449187995	0.0358385617482293
SPNCRNA.530	1.00649278245143	0.018152971866074
SPAC22F8.05	1.00605080311515	0.0047455323447614
SPBC1652.01	1.0018615205537	0.0000285260263966553
sgo1	0.998072534894073	0.0000961510103072601
SPNCRNA.1402	0.99783251469131	0.00098660733230146
SPACUNK4.09	0.9912997030802	0.00931350006901346
SPNCRNA.1150	0.989074576557902	0.000209762440709608
SPNCRNA.621	0.986722822595195	0.0109918586336648
SPNCRNA.647	0.985716417654855	0.0000112864173357345
SPNCRNA.1596	0.983402524510777	0.0490249384099403
new2	0.982985010059198	0.00292840191528148
SPNCRNA.670	0.982594935678578	0.016668181396487
SPCC417.04	0.981295949619901	0.02363063328565
SPNCRNA.971	0.964949097080034	0.000533134359296155
SPNCRNA.1593	0.964437598282401	0.0109947408706446
ppm1	0.963233773785133	2.62832800536343E-06
SPNCRNA.1267	0.957930652106179	0.0476504607866473
SPNCRNA.1548	0.955194296561548	0.00315223943579498
SPNCRNA.1211	0.952423846074985	0.0385907441558981
SPAC750.01	0.947820085710424	0.0300667542286279
dal1	0.944982451348333	0.000556431689989295
gon7	0.943480055903581	0.0000319493878766641
mug147	0.941306699474972	0.00145266140477766
SPNCRNA.1684	0.937524978639803	0.00994839167186742
SPNCRNA.901	0.934558519730462	0.0451599657617482
SPNCRNA.802	0.934312525376111	0.0363136843975268
rsd1	0.933330547073402	0.0000917629735496722
SPNCRNA.562	0.930048269751602	0.0347614263997958
tam13	0.928302032551173	0.000369344770744494
hsp9	0.927431818232662	0.0293340242634841
SPNCRNA.838	0.927356316090788	0.000662636640435187
SPNCRNA.746	0.927003700602089	0.00436701340588089
SPNCRNA.856	0.924281930157598	0.00910408555390392
SPNCRNA.1615	0.92064508026523	0.00800320112467105
SPNCRNA.1398	0.919326840895935	0.0117540750960443
SPNCRNA.1239	0.918357070206795	0.0166956873542633
SPNCRNA.920	0.917649473305746	0.000763252439733275
SPNCRNA.1504	0.913002369514978	0.00151066334087175
SPAPB24D3.07c	0.912559432201284	0.0137483340914833
rdh54	0.911234616095767	0.000430371903347927
mus81	0.91063108745364	7.25266225405902E-07
nbl1	0.90942221562645	0.0258129052770255
meu19	0.908040071133016	0.0391209732127074
nuc2	0.903769563214056	1.68192655235902E-07
SPNCRNA.891	0.901618456527316	0.0404081593650449
SPBC21C3.19	0.900971166740918	0.0430315686763611
SPBC19C7.04c	0.898808021473323	0.000700727142004578
dbp2	0.896112624230637	0.00219053343599112
SPNCRNA.1025	0.894753851182335	0.0231032865192981
iph1	0.894185455360034	5.19848549461935E-09
SPNCRNA.1428	0.892257054222047	0.000161641568575783
zym1	0.889601583338505	0.0447297909764925
SPBC1734.10c	0.888898128373033	1.9430205970352E-07
SPBC21D10.08c	0.885019340189674	0.0135849919118325
spn6	0.87735909394361	0.0119155341901308
SPAC12B10.08c	0.872431671691499	0.0085779683420194
SPNCRNA.1297	0.870811603545876	0.0102048320791773
sen54	0.868423459949683	0.000514294251137519
SPNCRNA.1142	0.868404690268611	0.0232976863962725
SPNCRNA.1487	0.864427135084424	0.00158658847924205
SPNCRNA.972	0.861083159673546	0.000147101645098248
SPNCRNA.1567	0.861027617582133	0.00921132181655989
ebp2	0.860234355106801	0.000120639411596683
SPNCRNA.605	0.857724886696199	0.000159347415469346
cid11	0.85622322304779	0.0249081504837981
SPCC417.11c	0.855753353222715	0.0110759267353587
SPNCRNA.827	0.855599238628242	0.00948234950017513
SPNCRNA.814	0.855375940314704	0.0195928667874133
SPBP8B7.15c	0.850050659254016	3.59817553716964E-06
SPBC2F12.05c	0.849816208367578	1.54384454281766E-06
SPNCRNA.1067	0.848742850273498	0.0282929958074376
osr2	0.844310566069903	0.00161899089124056
hsp3102	0.843695387557283	0.021845185757991
SPNCRNA.955	0.841723403057779	0.0373611568394946
SPNCRNA.724	0.83930156965016	0.000935117347313759
SPNCRNA.1667	0.83899253612519	0.0255821443801169
SPNCRNA.1026	0.837806037449045	0.00169001788848662
ish1	0.836780917784075	0.000181504114391674
csn71	0.835028379909774	0.000575009354595895
rga9	0.834208684731243	8.31163344273895E-07
SPCC1672.09	0.830479933146207	5.28783233346377E-07
rec7	0.828163466414487	0.0305318482503555
SPNCRNA.609	0.827459092733721	0.0103267820968586
alo1	0.824040549333225	0.000143642073793774
SPAC637.06	0.822415489209724	1.68578044371394E-07
ypt4	0.818859879603856	0.020051430832489
SPNCRNA.1408	0.817981162445541	0.00351518541071577
SPNCRNA.1286	0.815450172409011	0.0077787187520901
alr1	0.810040872400132	0.00295574169420177
slm5	0.806111783545586	0.00139303323275369
SPCC1682.08c	0.804101769786491	0.000826581378319543
meu14	0.803076122277388	0.0426023171466688
SPAP32A8.02	0.799462164314179	0.0190893754725449
mst1	0.79181705149815	0.0018946949163946
pof14	0.791493702961652	0.0194000206621694
ubp4	0.791481513514586	0.0000868625915829414
SPNCRNA.1682	0.789303435717365	0.02145866667565
man1	0.788221459387953	0.000872058259208461
SPNCRNA.1531	0.786556348871074	0.000849249220716003
hrr1	0.783881115392737	0.000181504114391674
frp2	0.783348752461941	0.0067740959532183
mfc1	0.779170022840481	0.0133700566364084
SPNCRNA.773	0.778959380152566	0.0133283356815383
dli1	0.7785636076467	0.0246201986217319
rbd2	0.773831988861132	0.000371874931926038
SPNCRNA.1080	0.772083849601453	0.0270383387256334
kpa1	0.769050049903404	0.00520435916598867
SPCC1020.13c	0.767907443956594	0.00580778212423353
ctp1	0.767121939659074	0.00535330578704247
SPNCRNA.797	0.764767981088783	0.00537469203526186
SPBC18E5.08	0.764134540970147	0.00978498518276117
red1	0.759953255936818	0.0000891691736411811
SPNCRNA.1183	0.753239109583587	0.0255821443801169
SPNCRNA.1532	0.75270212768851	0.0344884219535545
SPAC27D7.11c	0.748517568901663	0.00663524023239227
SPCC736.03c	0.740409573655975	0.00198791519817445
pyp3	0.739649413439235	0.00510647364622484
SPAC1A6.01c	0.737015110102202	0.00124926111569757
SPNCRNA.1212	0.732551416981882	0.0414767494951122
SPNCRNA.713	0.731620962929789	0.00340527695288673
SPBC3B9.04	0.729800442647212	0.00183403375567081
rmi1	0.726722865082341	0.0117540750960443
mug5	0.723516819459371	0.0447297909764925
SPCC16C4.22	0.721335782576133	0.00509905976083243
SPAC11D3.18c	0.712497350963529	0.00526723013297503
SPAC4F8.04	0.711774507948544	0.00359099605711041
SPNCRNA.1459	0.709526584409472	0.00871699894534115
pof2	0.703383170526827	0.00247968534408605
SPAPB24D3.03	0.702906402696642	0.00425753450950711
SPNCRNA.1662	0.696346442028418	0.0287779032667188
SPCC18.03	0.689428168145625	0.0000218936354350631
SPAC32A11.02c	0.688457194769198	0.00181449172755923
SPNCRNA.688	0.683711228169309	0.00295110034480807
ynd1	0.68332476702813	0.000585673292565553
SPNCRNA.1019	0.683246155185577	0.0197661721737612
SPAC823.02	0.682590059066173	0.00644586378773482
SPNCRNA.1077	0.68104615563818	0.0249575952949127
SPNCRNA.1421	0.678228331118222	0.00231555036415308
hrq1	0.677387206759194	0.00139876324909334
cog2	0.671602206819559	0.0000176539795628754
SPNCRNA.865	0.670957623282062	0.024124952400305
byr2	0.664218422599196	0.00994839167186742
hcn1	0.663741422243405	0.0139754211219271
chp2	0.662734874196142	0.00774436050437866
SPNCRNA.683	0.661469125462709	0.0442698375914272
SPNCRNA.655	0.65627327554992	0.0211524457961822
esf2	0.656045522685768	0.0110270117152907
ecl1	0.655837057949897	0.00815996633702212
SPCC965.12	0.651248011752762	0.0438022238802318
mok13	0.638106807924315	0.00602639806951838
hsp3101	0.637074634289553	0.013248030673559
SPBC18H10.09	0.636220236628464	0.0371251460745822
rhp41	0.632226050814113	0.000430871078753512
SPNCRNA.1027	0.629422958702788	0.0163600456465225
mug190	0.629160807221642	0.00872868959261104
npr2	0.62784682098025	0.0192381371447749
SPCC645.10	0.622659325268301	0.000452479802111371
mik1	0.617206894708321	0.00139351158734549
sgt1	0.617156353744076	0.0244738499093026
utp25	0.607744693601202	0.0192309875316896
SPBC14C8.15	0.60166010656718	0.00733343663248722
mug30	0.600383053776884	0.00525642938416462
SPAC6G10.10c	0.596903714269929	0.00957873040311316
cwf25	0.594356807157695	0.0150514840163943
wtf25	0.592303387816693	0.0133700566364084
SPAC9G1.08c	0.589667800098047	0.00276925792631181
pbi2	0.587793514806017	0.0326166104890016
SPBC14F5.10c	0.587118121690712	0.00194648820452647
tbp1	0.586579699677525	0.040427909997754
SPCPB16A4.06c	0.586151078901514	0.0362909588134627

## Sheet: Overlap mot2∆-rrp6∆
Gene= Name of the feature
Shown are log2 fold changes between the indicated mutant and WT as provided by DeSEQ2
adjusted p-value = significance of the upregulation corrected for multiple hypothesis testing. As provided by DeSEQ2
Blue rows indicate known Mmi1 targets (Hiriart et al.. 2012)
Gene	Log2(fold change mot2∆ vs WT)	Adjusted p-value mot2∆ vs WT	Log2(fold change rrp6∆ vs WT)	Adjusted p-value rrp6∆ vs WT
mcp5	3.25306661296538	1.7580193245705E-43	2.33441405306956	6.98217584112837E-21
meu13	3.06615028149402	1.27529860629294E-18	1.74157188865637	0.000039412441041658
spo5	3.02849536319479	5.69385204718187E-19	1.31922708136409	0.000789160802892095
zym1	2.95769451698224	5.74393313926387E-42	0.889601583338505	0.0447297909764925
meu26	2.87910667025118	1.3932556008049E-19	2.46608303658532	2.7580905708838E-14
hsp16	2.75689492891799	1.00392154087594E-29	1.4676615423467	1.08432972098701E-07
mug4	2.71644509342019	2.2669376052289E-23	2.29554255078389	1.13263860871039E-18
rec10	2.70937064963751	1.47740728702707E-55	2.49647691742144	8.43392861906759E-41
rec15	2.51647446924904	1.33770601484316E-14	1.44087990852036	0.000533134359296155
meu19	2.46624495413201	6.27013323011467E-11	0.908040071133016	0.0391209732127074
mek1	2.46557226833839	1.70167625155186E-29	2.64347684377467	2.75650922053309E-27
mcp3	2.09591565330391	4.73429224928867E-17	1.72683846171499	6.86913815198756E-14
SPNCRNA.71	2.04926176542583	7.09983285691685E-09	1.09699703198738	0.0190343349148802
SPCC737.04	2.02779373338108	2.21698782524693E-07	2.02405299929912	1.62418450471775E-12
rec11	2.02370304693019	6.15542390099669E-10	2.26745881679898	4.60590108970626E-13
sme2	2.00772734350612	3.1358629032004E-10	3.21451186798983	2.651370194944E-31
spn6	2.00280595723659	2.07008343824515E-24	0.87735909394361	0.0119155341901308
SPNCRNA.584	1.99245228936142	2.40922014478716E-12	2.13787634579271	7.42717535125176E-13
rec7	1.93904937725533	2.85454454857184E-11	0.828163466414487	0.0305318482503555
mcp6	1.93439082190426	4.27839593236374E-13	1.83341946720564	2.92654564205477E-11
mug147	1.91065235417402	2.92477778588094E-14	0.941306699474972	0.00145266140477766
meu1-1	1.82876710576151	2.50820040898653E-08	2.30632986782816	4.26796765507464E-15
rec8	1.77298033586171	8.35219488857278E-15	2.43538014038802	5.64970024219432E-28
SPNCRNA.556	1.72878266120848	7.70083590794729E-06	1.43040043721475	0.000717853443919874
SPAPB17E12.09	1.72391437191963	0.0000103492626235666	2.33342820700293	7.48783534549415E-12
SPNCRNA.1238	1.66412107949986	8.15681419711445E-06	1.07093240315274	0.0215427367914736
SPAC23H3.15c	1.66104089171003	1.76708106741693E-07	1.50926769447027	0.0000396222128710813
cid11	1.65456120082384	5.13712754922606E-07	0.85622322304779	0.0249081504837981
SPBC21D10.08c	1.63553599606212	0.0000012381954481817	0.885019340189674	0.0135849919118325
spn7	1.62112182969327	9.38972165490438E-10	1.03754391163115	0.0000714815365455709
mug28	1.60090552689763	4.36044065713331E-07	1.51310248959992	2.65772285434619E-06
SPAC27D7.09c	1.59929375015236	0.0000123385870408415	2.2642781346207	8.08153938648539E-11
mug10	1.59546472659726	5.11172658014638E-07	2.47645593066312	1.52648942356569E-18
mei4	1.5954577756321	0.0000016939859302122	1.97594752776383	5.19682097012762E-10
rec25	1.56956743237857	2.8898011414669E-09	2.17495845154678	1.11845055795049E-18
mug20	1.54358316745668	4.75630809467805E-06	1.0786461974836	0.00656973163956219
meu14	1.53873535113393	8.91114527090271E-06	0.803076122277388	0.0426023171466688
rep1	1.5386574696263	2.78144339481243E-10	1.31615386282771	9.31305191072854E-09
mug45	1.47591310227195	5.79370208280971E-12	2.17668472513019	6.68746961557482E-24
meu32	1.40151502229074	0.000109321894530795	2.30955647221205	1.09522994114866E-13
SPBPB21E7.04c	1.40042031267558	0.0000136142627316719	2.45477613163553	2.51620495300535E-17
SPAC4H3.03c	1.39155904700501	5.94863145029172E-08	1.51053761716954	7.03588499725395E-07
SPCC569.07	1.37881753723156	3.04780256280981E-12	1.4758233015937	1.91473315766577E-13
mug125	1.37604631651642	1.48918866187418E-08	2.4562194102032	3.26366321632429E-27
atf31	1.3600601303175	0.0000254811545731876	2.43034941556526	1.90808660638853E-19
crs1	1.34536440871363	5.69132995713731E-06	1.62653447030763	5.02350201992843E-10
mde6	1.30638176749557	0.0000125760827682502	1.03494067155507	0.0000491878279722887
mug95	1.27225171392225	0.00171399919114664	1.05113316968712	0.0247184962618834
mcp4	1.23435459708875	0.000173064038455791	1.33255075944804	3.60274659336163E-07
hsp3102	1.22844460316735	0.00145317652777844	0.843695387557283	0.021845185757991
ssm4	1.22809494293124	0.00143171043308463	2.65296518817132	8.60031864081872E-16
bqt1	1.21682009866696	0.000945617858948646	1.4977571551823	0.0000304834332076191
dic1	1.19504026283946	0.000224667824348433	1.74674954030379	3.85143010742778E-09
lsd90	1.19233510441812	1.84882537969769E-06	1.55441670646425	2.78447720004056E-06
SPCPB16A4.06c	1.11383425826936	2.53954156131481E-07	0.586151078901514	0.0362909588134627
SPCC11E10.09c	1.08567357030596	0.000134177094614466	1.14025665812722	0.0000020874631523082
hsp3101	1.07378803402521	0.00023672250142918	0.637074634289553	0.013248030673559
SPAC637.03	1.04807825186005	0.00332109196228871	1.05128292732421	0.00509868591521186
SPAC22F8.05	1.04353010853284	0.00207618544585391	1.00605080311515	0.0047455323447614
dli1	1.03990212453444	0.000438646453339804	0.7785636076467	0.0246201986217319
SPAPB24D3.07c	1.02571789816838	0.0148313049279215	0.912559432201284	0.0137483340914833
mug82	1.01498794354087	0.0103671710686291	1.0624211049889	0.0123496374639913
rec24	1.00407857490312	0.000983282586808102	1.03548576538498	0.00340058755828011
SPNCRNA.626	0.995018339874952	0.00165572028894801	1.79826671565924	3.53182269250892E-10
cwf25	0.979460892467218	9.41509804007322E-09	0.594356807157695	0.0150514840163943
SPNCRNA.561	0.976205867983707	0.0121460885545445	1.87677535581966	6.61830363687169E-12
mik1	0.974161160187957	1.65750446221499E-09	0.617206894708321	0.00139351158734549
SPCC569.09	0.971414874466536	0.00334261274724216	1.09292887589085	0.000329701494249031
SPAC32A11.02c	0.964692187916041	0.0000271261947638361	0.688457194769198	0.00181449172755923
SPAC6C3.05	0.964464328850701	0.0303005122764623	1.03213843540238	0.0273748647492704
prl56	0.93176843646775	0.0172698245576081	1.46535222005645	0.0000094426675056169
eng2	0.931534061246839	0.000396221100574698	2.14138630542362	1.62298511832064E-27
mug1	0.927807853629477	0.000257701927921372	1.73233412869449	1.8047810730504E-14
SPBC2F12.05c	0.922939054459417	3.84579527945684E-07	0.849816208367578	1.54384454281766E-06
SPNCRNA.580	0.921877615216889	0.0230754339823658	1.89897528617759	2.06084901821596E-08
rec6	0.916954674520737	0.00118879270908206	1.24810258722894	7.84271227482061E-06
rim20	0.911026057840693	6.06839376082123E-06	1.32792079921012	3.37050644268879E-12
ppk31	0.888448889006157	9.50300864766035E-06	1.0327415931	1.09226583672173E-06
tht2	0.823030786556441	0.00223687282782118	1.54716933401806	2.69882293462224E-09
rdh54	0.82197069664343	0.000679097401915132	0.911234616095767	0.000430371903347927
mus81	0.815841440811951	3.28824990447568E-06	0.91063108745364	7.25266225405902E-07
SPNCRNA.1696	0.813355762117103	0.02901351853492	3.10730567931122	4.51246050359394E-47
mok13	0.807262141474813	0.000191910398208464	0.638106807924315	0.00602639806951838
mde10	0.796800937839397	0.00312162908658714	1.01318923563356	0.0000392563651212391
pof2	0.767600462639717	0.00143997439791323	0.703383170526827	0.00247968534408605
frp2	0.766710574957811	0.00581813476683175	0.783348752461941	0.0067740959532183
ecl1	0.755950991967431	0.000145823966913164	0.655837057949897	0.00815996633702212
pof14	0.738837203180901	0.00399308411073821	0.791493702961652	0.0194000206621694
dal1	0.730805533835589	0.00307999042935216	0.944982451348333	0.000556431689989295
SPNCRNA.920	0.708150864651984	0.00807063632249365	0.917649473305746	0.000763252439733275
mug30	0.684423667601788	0.0147389920185174	0.600383053776884	0.00525642938416462
pbi2	0.667359054250644	0.00634231957072635	0.587793514806017	0.0326166104890016
npr2	0.666881690678641	0.0176234097392365	0.62784682098025	0.0192381371447749
mug8	0.656383824194709	0.0231539762721764	1.25223396602579	2.22083411081034E-06
byr2	0.651013410512538	0.00556044965444058	0.664218422599196	0.00994839167186742
mug190	0.637634779768095	0.00470130544703847	0.629160807221642	0.00872868959261104
SPNCRNA.1626	0.61983433822634	0.0378857286327544	1.82888882096295	1.82465803372234E-17
SPNCRNA.865	0.608994347635154	0.0218087170297632	0.670957623282062	0.024124952400305
SPNCRNA.1494	0.599722972753104	0.0304663767093617	2.04302323392034	3.6973808985943E-24
nuc2	0.585490508070438	0.000459045537425648	0.903769563214056	1.68192655235902E-07

## Sheet: Functional analysis
enriched functional clusters for upregulated genes in mot2∆ cells, as provided by the DAVID analytic tool
540 out of 622 genes were used for the analysis, the 82 remaining correspond to ncRNAs whose systematic ID could not be recognized
the first 3 clusters are reported using the highest stringency settings
Cluster 1: Meiosis	Enrichment Score: 48.01
Annotation Dataset	Annotation	gene Count	Benjamini p-value
GOTERM_BP_FAT	meiotic cell cycle	138	5.3E-46
GOTERM_BP_FAT	M phase of meiotic cell cycle	137	8.3E-46
GOTERM_BP_FAT	meiosis	137	8.3E-46
Cluster 2: Mating and conjugation	Enrichment Score: 9.39
Annotation Dataset	Annotation	gene Count	Benjamini p-value
GOTERM_BP_FAT	sexual sporulation	33	0.000000037
GOTERM_BP_FAT	ascospore formation	33	0.000000037
GOTERM_BP_FAT	sexual sporulation resulting in formation of a celluar spore	33	0.000000037
Cluster 3: Kinase Activity	Enrichment Score: 2.64
Annotation Dataset	Annotation	gene Count	Benjamini p-value
INTERPRO	Serine/threonine protein kinase. active site	22	0.26
INTERPRO	Serine/threonine protein kinase-related	22	0.18
INTERPRO	protein kinase. ATP binding site	22	0.19
INTERPRO	Protein Kinase. core	22	0.19
SP_PIR_KEYWORDS	serine/threonine-protein kinase	22	0.085
UP_SEQ_FEATURE	domain:protein kinase	22	0.77
