# Supplementary material for: Ubiquitination-dependent control of sexual differentiation in fission yeast
Source: eLife journal article supplement (doi:10.7554/elife.28046), 2017-08-25
Supplement: supp [file elife-28046-supp-v1.zip › elife_poa_e28046_Figure_3_figure_supplement_1.pdf]

**A**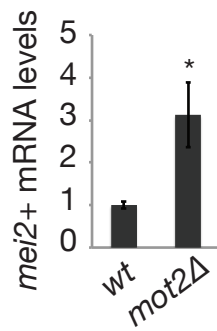**B**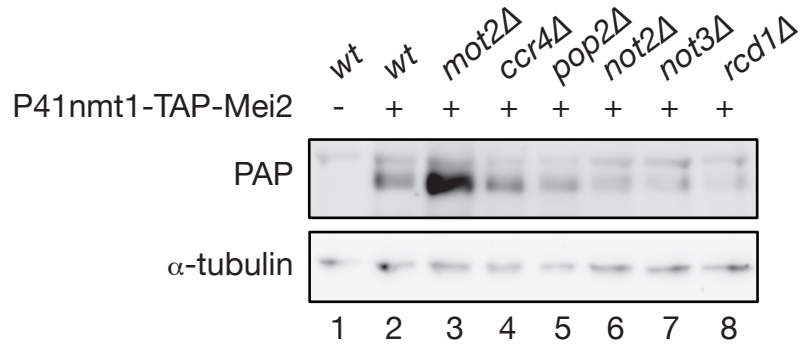

**Figure 3-figure supplement 1. The E3 ubiquitin ligase Mot2 negatively affects the levels of the Mmi1 inhibitor Mei2.**

**(A)** RT-qPCR analysis of *mei2*<sup>+</sup> mRNAs levels in wt and *mot2*Δ cells grown in minimal medium (EMM0.5X). Signals were normalized to *act1*<sup>+</sup> mRNA levels and expressed relative to the wild type strain. Error bars represent the standard deviation from at least three independent experiments. The star denotes statistical significance relative to wild type cells (t-test p-value=1.1E-2).

**(B)** Western blot showing total TAP-Mei2 levels expressed from the P41nmt1 promoter in minimal medium (EMM0.5X) in wild type cells and strains deleted for non-essential subunits of the Ccr4-Not complex (i.e. all but Not1). An anti-tubulin antibody was used as a loading control.
