# Supplementary material for: Ubiquitination-dependent control of sexual differentiation in fission yeast
Source: eLife journal article supplement (doi:10.7554/elife.28046), 2017-08-25
Supplement: supp [file elife-28046-supp-v1.zip › elife_poa_e28046_Figure_6_figure_supplement_2.pdf]

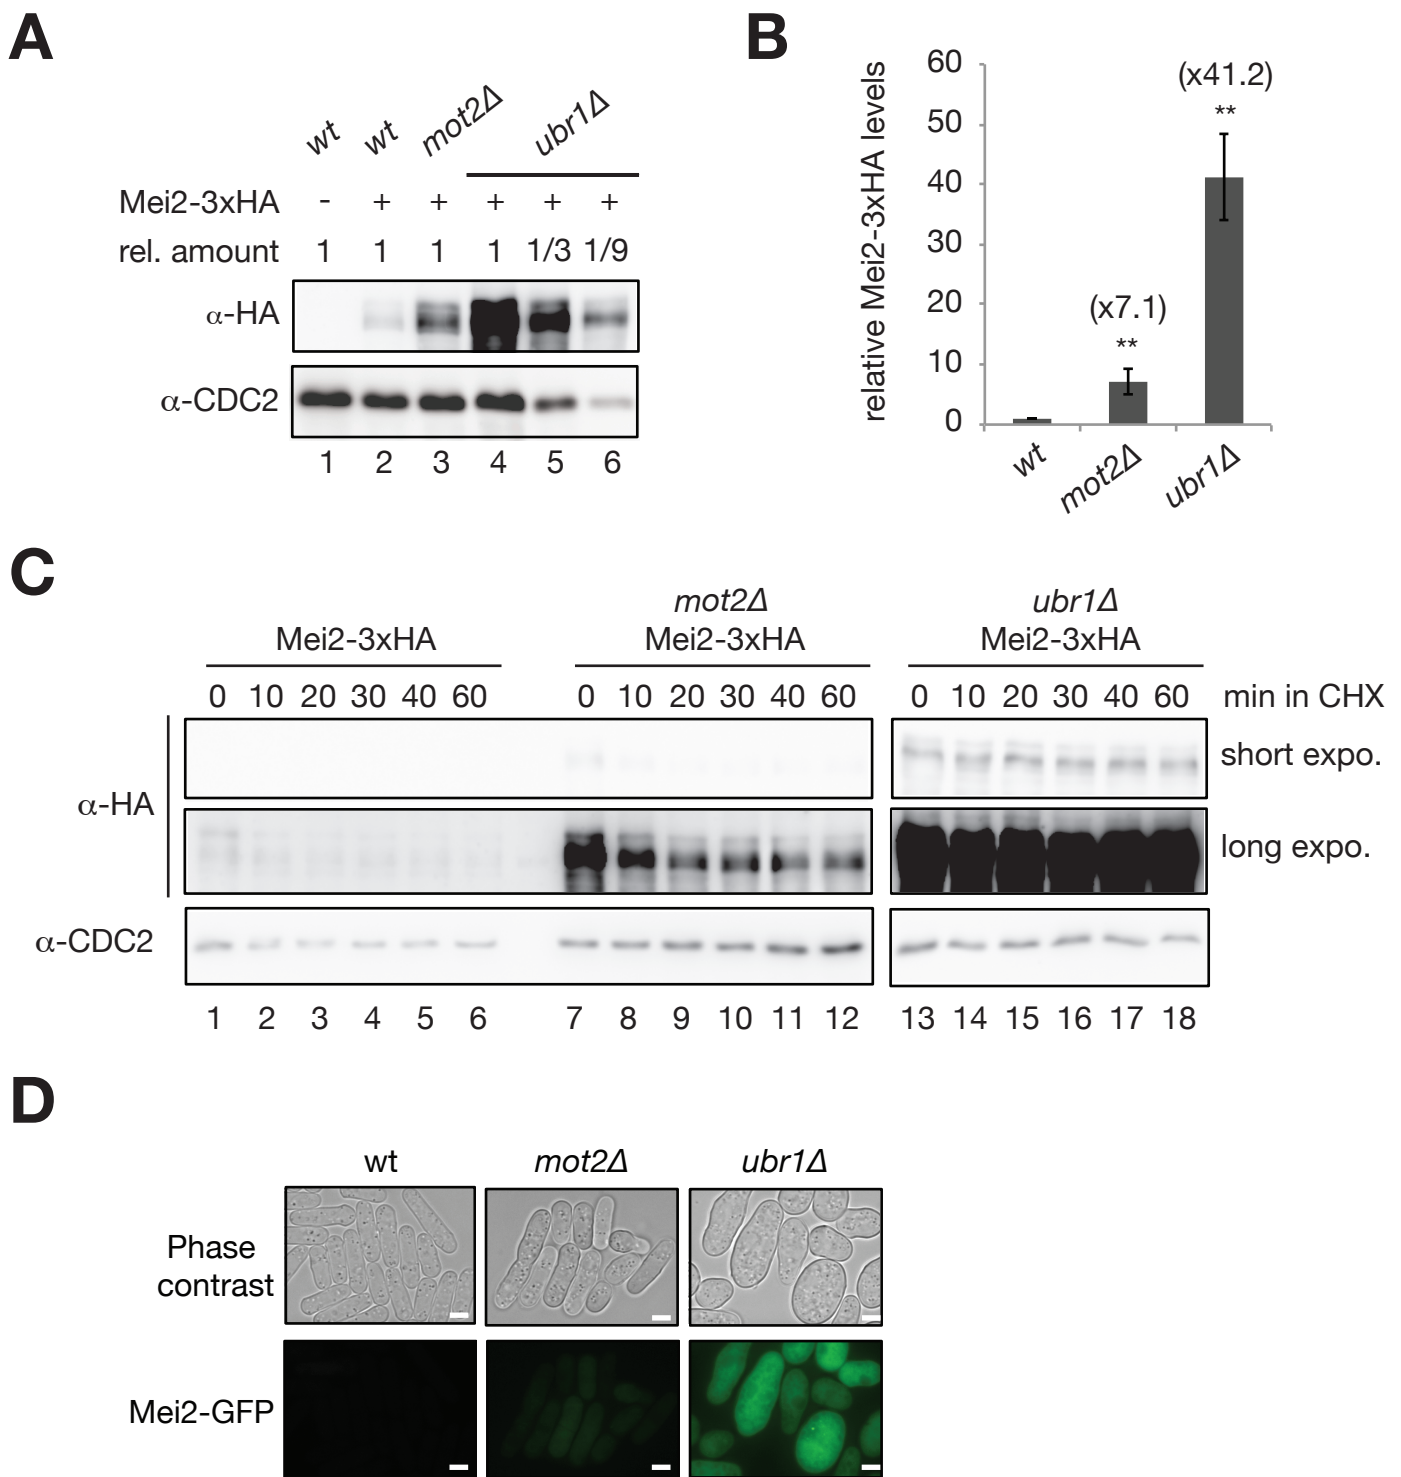

**Figure 6-figure supplement 2. Both Mot2 and Ubr1 limit the accumulation of Mei2.**

(A) Representative Western blot showing total Mei2-3xHA levels in wt, *mot2Δ* and *ubr1Δ* cells grown in minimal medium (EMM0.5X) at 30°C. Mei2 was detected using an anti-HA antibody and an anti-CDC2 antibody was used as a loading control.

(B) Quantification of total Mei2-3xHA levels, normalized to CDC2 and expressed relative to wild type cells. Error bars represent the standard deviation from five independent experiments. Stars denote statistical significance relative to Mei2-3xHA wild type cells (t-test p-values = 2.66E-3 for *mot2Δ*, and 2.25E-4 for *ubr1Δ*).

(C) Cycloheximide chase experiment of Mei2-3xHA in wt, *mot2Δ* and *ubr1Δ* cells. Cells were grown in minimal medium (EMM0.5X) at 30°C and harvested at the indicated time points following addition of 100 µg/mL cycloheximide. Mei2 was detected by immunoblotting using an anti-HA antibody and an anti-CDC2 antibody was used as a loading control.

(D) Live cell microscopy of GFP-tagged Mei2 in wt, *mot2Δ* and *ubr1Δ* cells. Cells were grown in minimal medium (EMM0.5X) and imaged by phase contrast and with a GFP filter. Scale bars = 5 µm.
