# Supplementary material for: Ubiquitination-dependent control of sexual differentiation in fission yeast
Source: eLife journal article supplement (doi:10.7554/elife.28046), 2017-08-25
Supplement: supp [file elife-28046-supp-v1.zip › elife_poa_e28046_Supplementary_file_1.docx]

**Supplementary file 1. *S. pombe* strains used in this study**

| Strain | Genotype | Source |
| --- | --- | --- |
| PR040 | h90, *ura4-DS/E, ade6-M210, leu1-32, mat3M::ura4+* | D. Moazed |
| PR167 | h90, *ura4-DS/E, leu1-32, mat3M::gfp+::natRMX* | M. Bühler |
| PR206 | PR167, rrp6::*kanRMX* | This study |
| PR314 | PR040, Mmi1-TAP::*hphRMX* | This study |
| PR389 | PR040, Pop2-3xFLAG::*kanRMX* | This study |
| PR398 | PR040, Not1-3xFLAG::*kanRMX* | This study |
| PR403 | PR040, Mmi1-TAP::*hphRMX* Pop2-3xFLAG::*kanRMX* | This study |
| PR404 | PR040, Mmi1-TAP::*hphRMX* Not1-3xFLAG::*kanRMX* | This study |
| PR425 | PR040, pop2::*natRMX* | This study |
| PR426 | PR040, ccr4::*natRMX* | This study |
| PR430 | PR040, Mtl1-TAP::*hphRMX* Not1-3xFLAG::*kanRMX* | This study |
| PR440 | PR040, red1::*natRMX* Mmi1-TAP::*hphRMX* Not1-3xFLAG::*kanRMX* | This study |
| PR446 | PR040, Red1-TAP::*hphRMX* Not1-3xFLAG::*kanRMX* | This study |
| PR469 | PR040, not3::*kanRMX* | This study |
| PR471 | PR040, rcd1::*kanRMX* | This study |
| PR483 | PR040, not2::*natRMX* | This study |
| PR486 | PR040, rrp6::*hphRMX* | This study |
| PR523 | PR040, mot2::*natRMX* Mmi1-TAP::*hphRMX* | This study |
| PR524 | PR040, mot2::*natRMX* Pop2-3xFLAG::*kanRMX* | This study |
| PR526 | PR167, mot2::*kanRMX* | This study |
| PR576 | PR040, Mot2-3xFLAG::*kanRMX* | This study |
| PR597 | PR040, *kanRMX*::P41nmt1-3xFLAG-Mmi1 | This study |
| PR637 | PR040, Mei2-3xHA::*hphRMX* | This study |
| PR646 | PR040, *kanRMX*::P41nmt1-TAP-Mmi1 Mei2-3xHA::*hphRMX* | This study |
| PR647 | PR040, mot2::*natRMX* Mei2-3xHA::*hphRMX* | This study |
| PR652 | PR040, mei2::*hphRMX* | This study |
| PR657 | PR040, mot2::*natRMX* mei2::*hphRMX* | This study |
| PR658 | PR040, rrp6::*natRMX* mei2::*hphRMX* | This study |
| PR662 | PR040, pREP1-6His-Ubi::*LEU2* | This study |
| PR664 | PR040, mot2::*natRMX* *kanRMX*::P41nmt1-TAP-Mmi1 Mei2-3xHA::*hphRMX* | This study |
| PR667 | PR040, Mei2-3xHA::*hphRMX*, pREP1-6His-Ubi::*LEU2* | This study |
| PR668 | PR040, mot2::*natRMX* Mei2-3xHA::*hphRMX*, pREP1-6His-Ubi::*LEU2* | This study |
| PR669 | PR040, *kanRMX*::P3nmt1-3xFLAG-Mei2 | This study |
| PR675 | PR040, *kanRMX*::P41nmt1-TAP-Mei2 | This study |
| PR676 | PR040, Mei2-GFP::*kanRMX* | This study |
| PR687 | PR040, mot2::*natRMX* Mei2-GFP::*kanRMX* | This study |
| PR714 | PR040, mei4::*natRMX* *kanRMX*::P41nmt1-TAP-Mmi1-(1-65)∆ Mei2-3xHA::*hphRMX* | This study |
| PR720 | PR040, mot2::*natRMX* *kanRMX*::P41nmt1-TAP-Mei2 | This study |
| PR721 | PR040, red1::*natRMX* *kanRMX*::P41nmt1-TAP-Mei2 | This study |
| PR722 | PR040, pop2::*natRMX* *kanRMX*::P41nmt1-TAP-Mei2 | This study |
| PR723 | PR040, rrp6::*natRMX* *kanRMX*::P41nmt1-TAP-Mei2 | This study |
| PR725 | h-, *ura4-D18, leu1-32, mts2-1* Mei2-3xHA*::hphRMX* | This study |
| PR726 | PR040, mei4::*natRMX* mmi1::*hphRMX kanRMX*::P41nmt1-TAP-Mei2 | This study |
| PR728 | h-, *ura4-D18, leu1-32, mts2-1* mot2::*natRMX* Mei2-3xHA*::hphRMX* | This study |
| PR731 | PR040, mot2::*natRMX* *kanRMX*::P41nmt1-TAP-Mei2 pREP41::*LEU2* | This study |
| PR735 | PR040, ccr4::*natRMX* *kanRMX*::P41nmt1-TAP-Mei2 | This study |
| PR736 | PR040, not2::*natRMX* *kanRMX*::P41nmt1-TAP-Mei2 | This study |
| PR737 | PR040, not3::*natRMX* *kanRMX*::P41nmt1-TAP-Mei2 | This study |
| PR747 | h-, *ura4-D18, leu1-32, mts2-1,* Mei2-3xHA*::hphRMX* pREP1-6His-Ubi::*LEU2* | This study |
| PR748 | h-, *ura4-D18, leu1-32, mts2-1* mot2::*natRMX* Mei2-3xHA*::hphRMX* pREP1-6His-Ubi::*LEU2* | This study |
| PR753 | PR040, Mot2-GFP::*kanRMX* | This study |
| PR759 | PR040, red1::*natRMX* Mmi1-TAP::*hphRMX* Pop2-3xFLAG::*kanRMX* | This study |
| PR785 | PR040, Mmi1-TAP::*hphRMX* Mot2-GFP::*kanRMX* | This study |
| PR790 | PR040, red1::*natRMX* Mmi1-TAP::*hphRMX* Mot2-GFP::*kanRMX* | This study |
| PR792 | PR040, mot2::*natRMX* | This study |
| PR802 | PR040, mot2::*natRMX* Mmi1-TAP::*hphRMX* Mei2-GFP::*kanRMX* | This study |
| PR821 | PR040, ubr1::*kanRMX*, Mei2-3xHA*::hphRMX* | This study |
| PR853 | PR040, ubr1::*kanRMX* Mei2-3xHA*::hphRMX* pREP1-6His-Ubi::*LEU2* | This study |
| PR860 | PR040, rcd1::*hphRMX* *kanRMX*::P41nmt1-TAP-Mei2 | This study |
| PR869 | PR040, ubr1::*hphRMX* | This study |
| PR882 | PR040, Tef3-3xFLAG::*kanRMX* | This study |
| PR883 | PR040, Rpl1601-3xFLAG::*kanRMX* | This study |
| PR884 | PR040, *kanRMX*::P3nmt1-3xFLAG-Mei2 pREP1-6His-Ubi::*LEU2* | This study |
| PR887 | PR040, mot2::*natRMX* Rpl1601-3xFLAG::*kanRMX* | This study |
| PR888 | PR040, mot2::*natRMX* Tef3-3xFLAG::*kanRMX* | This study |
| PR889 | PR040, mot2::*natRMX* *kanRMX*::P41nmt1-TAP-Mei2 pREP41-Mot2-2xFLAG::*LEU2* | This study |
| PR890 | PR040, mot2::*natRMX* *kanRMX*::P41nmt1-TAP-Mei2 pREP41-Mot2-RING∆-2xFLAG::*LEU2* | This study |
| PR893 | PR040, ubr1::*hphRMX* Mei2-GFP::*kanRMX* | This study |
| PR904 | PR040, mot2::*natRMX* *kanRMX*::P41nmt1-TAP-Mei2 pREP41-Mot2-C37A-2xFLAG::*LEU2* | This study |
| PR905 | PR040, mot2::*natRMX* *kanRMX*::P41nmt1-TAP-Mei2 pREP41-Mot2-C45A-2xFLAG::*LEU2* | This study |
| PR906 | PR040, mot2::*natRMX* *kanRMX*::P41nmt1-TAP-Mei2 pREP41-Mot2-C57A-2xFLAG::*LEU2* | This study |
| PR930 | PR040, Mei2-3xFLAG::*kanRMX* pREP1-6His-Ubi::*LEU2* | This study |
