# Supplementary material for: Ubiquitination-dependent control of sexual differentiation in fission yeast
Source: eLife journal article supplement (doi:10.7554/elife.28046), 2017-08-25
Supplement: supp [file elife-28046-supp-v1.zip › elife_poa_e28046_Transparent_Reporting_File.pdf]

## eLife's transparent reporting form

We encourage authors to provide detailed information *within their submission* to facilitate the interpretation and replication of experiments. If you have any questions, please contact us: [editorial@elifesciences.org](mailto:editorial@elifesciences.org).

### Sample-size estimation

- You should state whether an appropriate sample size was computed when the study was being designed
- You should state the statistical method of sample size computation and any required assumptions
- If no explicit power analysis was used, you should describe how you decided what sample (replicate) size (number) to use

Please outline where this information can be found within the submission (e.g., page numbers or figure legends), or explain why this information doesn't apply to your submission:

The present study used the fission yeast *Schizosaccharomyces pombe* as a model organism and did not require sample-size estimation.

### Replicates

- You should report how often each experiment was performed
- You should include a definition of biological versus technical replication
- The data obtained should be provided and sufficient information should be provided to indicate the number of independent biological and/or technical replicates
- If you encountered any outliers, you should describe how these were handled
- Criteria for exclusion/inclusion of data should be clearly stated
- High-throughput sequence data should be uploaded before submission, with a private link for reviewers provided (these are available from both GEO and ArrayExpress)

Please outline where this information can be found within the submission (e.g., page numbers or figure legends), or explain why this information doesn't apply to your submission:

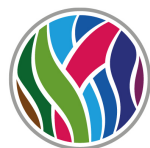

Information regarding the number of replicates is indicated in each figure legend where appropriate (Figures 2A-C, 3C-D, 4A-B, 5A-C, 6B-D, Figure 1-figure supplement 1A, Figure 2-figure supplement 1, Figure 3-figure supplement 1A, Figure 4-figure supplement 1B, Figure 5-figure supplement 1A-B, Figure 6-figure supplement 1B-E, Figure 6-figure supplement 2B). Data represent the average of at least 3 independent biological replicates, except in Figure 2-figure supplement 1, Figure 6D and Figure 6-figure supplement 1D-E (biological duplicates).

### Statistical reporting

- Statistical analysis methods should be described and justified
- Raw data should be presented in figures whenever informative to do so (typically when N per group is less than 10)
- For each experiment, you should identify the statistical tests used, exact values of N, definitions of center, methods of multiple test correction, and dispersion and precision measures (e.g., mean, median, SD, SEM, confidence intervals; and, for the major substantive results, a measure of effect size (e.g., Pearson's  $r$ , Cohen's  $d$ ))
- Report exact p-values wherever possible alongside the summary statistics and 95% confidence intervals. These should be reported for all key questions and not only when the p-value is less than 0.05.

Please outline where this information can be found within the submission (e.g., page numbers or figure legends), or explain why this information doesn't apply to your submission:

Information regarding statistical analyses is indicated in each figure legend where appropriate (Figures 2A-C, 3C-D, 4A-B, 5A-C, 6C, Figure 2-source data 1, Figure 3-figure supplement 1A, Figure 5-figure supplement 1A-B, Figure 6-figure supplement 1C, Figure 6-figure supplement 2B). Error bars represent the standard deviation from at least 3 independent experiments, except in Figure 6D and Figure 6-figure supplement 1E where they represent the deviation from the mean of 2 experiments. p-values were calculated using two-tailed t-tests and cut-offs can be found in the "Materials and Methods" section.

(For large datasets, or papers with a very large number of statistical tests, you may upload a single table file with tests, Ns, etc., with reference to page numbers in the manuscript.)

### Additional data files ("source data")

- We encourage you to upload relevant additional data files, such as numerical data that are represented as a graph in a figure, or as a summary table
- Where provided, these should be in the most useful format, and they can be uploaded as "Source data" files linked to a main figure or table

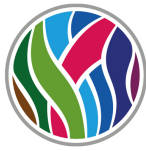

- Include model definition files including the full list of parameters used
- Include code used for data analysis (e.g., R, MatLab)
- Avoid stating that data files are “available upon request”

Please indicate the figures or tables for which source data files have been provided:

Source data files have been provided for Figures 1 and 2 (Figure 1-source data 1, Figure 2-source data 1)
