# Supplementary figures and images for: Ubiquitination-dependent control of sexual differentiation in fission yeast
Source: eLife journal article supplement (doi:10.7554/elife.28046), 2017-08-25

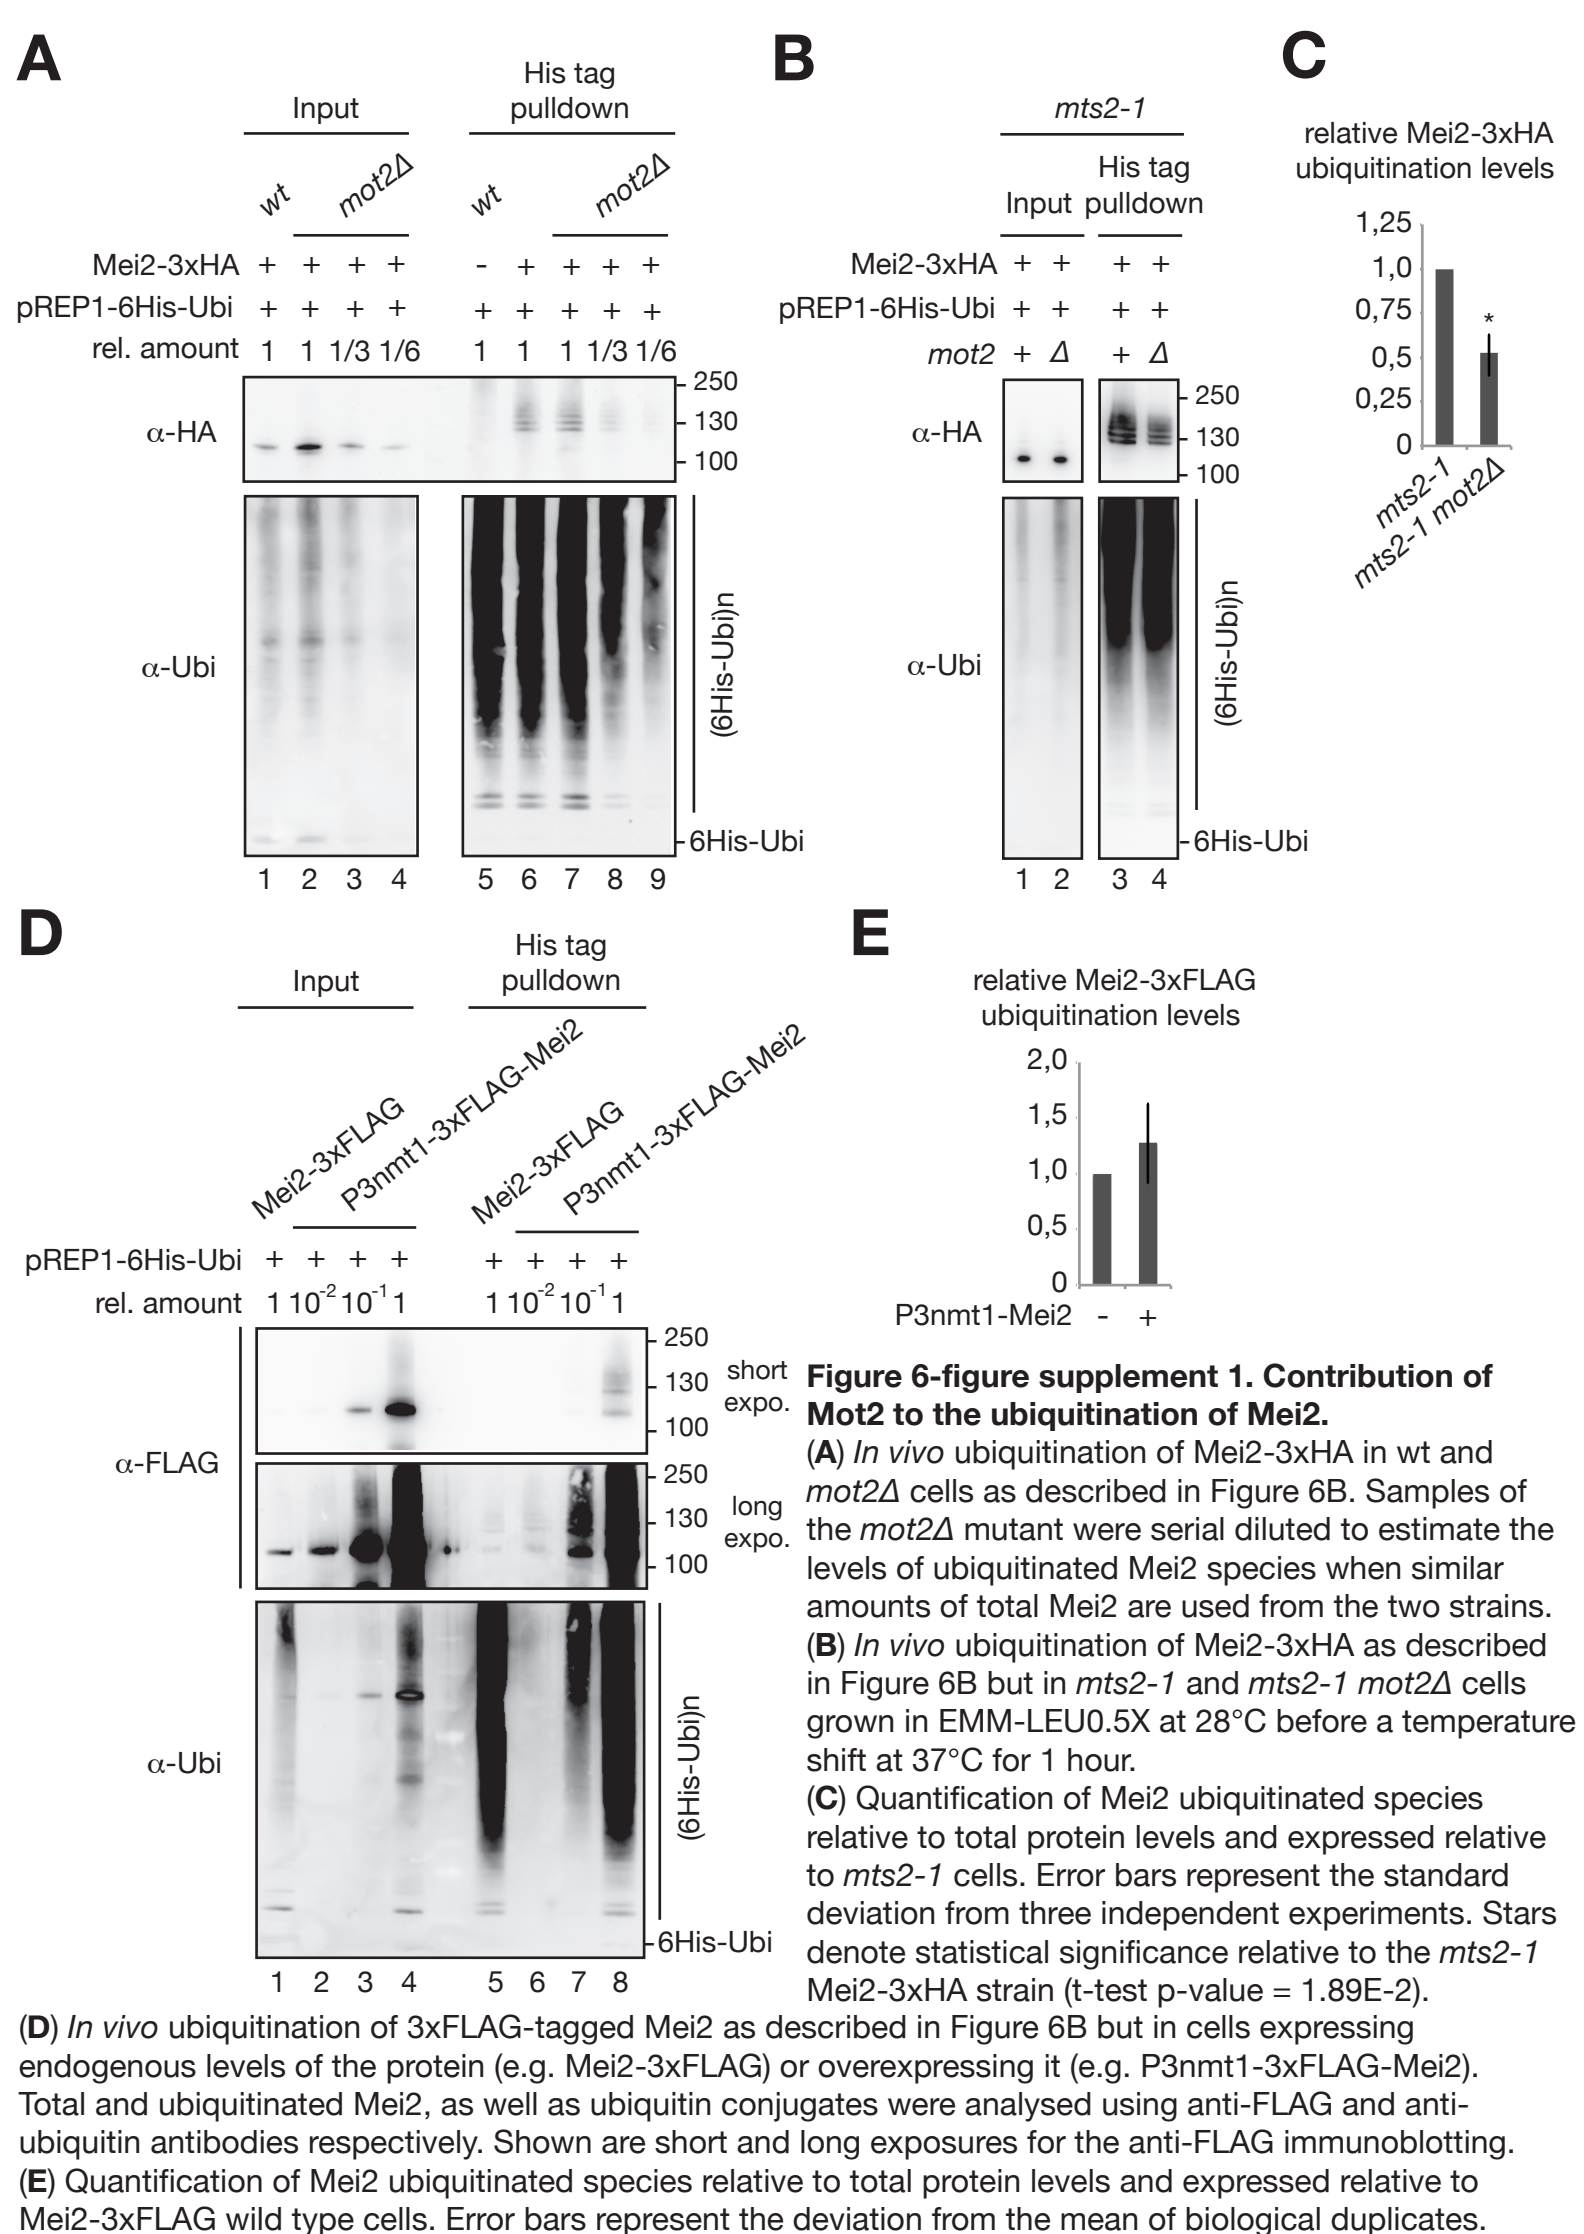

Supplement: supp [file elife-28046-supp-v1.zip › elife_poa_e28046_Figure_6_figure_supplement_1.pdf]
